# Supplementary material for: Entrainment and suspension of sand and gravel
Source: Copernicus journal article supplement (doi:10.5194/esurf-8-485-2020), 2020-06-03
Supplement: Supplementary file 1 [file esurf-8-485-2020-supplement.zip]

Archive with 3 entries (3 files):
- esurf-8-485-2020-supplement-title-page.pdf
- Table_S1.xlsx
- Table_S2.xlsx
