# Supplementary material for: Entrainment and suspension of sand and gravel
Source: Copernicus journal article supplement (doi:10.5194/esurf-8-485-2020), 2020-06-03
Supplement: Supplementary file 1 [file esurf-8-485-2020-supplement.zip › esurf-8-485-2020-supplement-title-page.pdf]

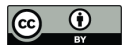

## *Supplement of*

# **Entrainment and suspension of sand and gravel**

**Jan de Leeuw et al.**

*Correspondence to:* Michael P. Lamb ([mpl@gps.caltech.edu](mailto:mpl@gps.caltech.edu))

- [esurf-8-485-2020-supplement-title-page.pdf](#)
- [Table\\_S1.xlsx](#)
- [Table\\_S2.xlsx](#)

The copyright of individual parts of the supplement might differ from the CC BY 4.0 License.
