# Supplementary material for: Entrainment and suspension of sand and gravel
Source: Copernicus journal article supplement (doi:10.5194/esurf-8-485-2020), 2020-06-03
Supplement: Supplementary file 1 [file esurf-8-485-2020-supplement.zip › Table_S1.xlsx]

## Sheet: parameters
Type	River	Reference	Name	Database no	Flow depth (m)	D_50 bed (m)	Bed slope, S (-)	Dune height (m)	Bed grainsize geom. stand. deviation, sigma_psi	Flow velocity, U (m/s)	Water temperature (deg)	Channel width (m)
River	Miss	Jordan 1965	P1	1	3.53568	0.00031	8.22e-05	0	0.678072	0.76	2.2	460
River	Miss	Jordan 1965	P2	2	4.63296	0.00031	8.22e-05	0	0.678072	0.74	2.2	460
River	Miss	Jordan 1965	P3	3	7.22376	0.00031	8.22e-05	0	0.678072	0.71	2.2	460
River	Miss	Jordan 1965	P4	4	3.62712	0.00031	8.22e-05	0	0.669027	0.69	2.2	460
River	Miss	Jordan 1965	P5	5	4.35864	0.00031	8.22e-05	0	0.669027	0.71	2.2	460
River	Miss	Jordan 1965	P6	6	6.79704	0.00031	8.22e-05	0	0.669027	0.77	2.2	460
River	Miss	Jordan 1965	P7	7	5.6388	0.00031	8.22e-05	0	0.669027	0.76	2.2	460
River	Miss	Jordan 1965	P8	8	8.47344	0.0003	8.36e-05	0	0.575312	1.14	9.4	497
River	Miss	Jordan 1965	P9	9	8.2296	0.0003	8.36e-05	0	0.575312	1.22	9.4	497
River	Miss	Jordan 1965	P10	10	13.3807	0.0003	8.36e-05	0	0.575312	1.12	9.4	497
River	Miss	Jordan 1965	P11	11	9.32688	0.0003	8.36e-05	0	0.575312	1.27	9.4	491
River	Miss	Jordan 1965	P12	12	8.47344	0.00029	8.36e-05	0	0.378512	1.09	16.1	491
River	Miss	Jordan 1965	P13	13	8.2296	0.00029	8.36e-05	0	0.378512	1.14	16.1	491
River	Miss	Jordan 1965	P14	14	13.3807	0.00029	8.36e-05	0	0.378512	1.06	16.1	491
River	Miss	Jordan 1965	P15	15	9.99744	0.00029	8.36e-05	0	0.378512	1.28	16.1	491
River	Miss	Jordan 1965	P16	16	7.86384	0.00033	7.49e-05	0	0.604071	1.08	25	493
River	Miss	Jordan 1965	P17	17	7.83336	0.00033	7.49e-05	0	0.604071	1.19	25	493
River	Miss	Jordan 1965	P18	18	11.8262	0.00033	7.49e-05	0	0.604071	1.08	25	493
River	Miss	Jordan 1965	P19	19	9.144	0.00033	7.49e-05	0	0.604071	1.19	25	493
River	Miss	Jordan 1965	P20	20	12.7102	0.000435	9.03e-05	0	0.678072	1.32	19.4	508
River	Miss	Jordan 1965	P21	21	12.0091	0.000435	9.03e-05	0	0.678072	1.62	19.4	508
River	Miss	Jordan 1965	P22	22	13.5331	0.000435	9.03e-05	0	0.678072	1.58	19.4	508
River	Miss	Jordan 1965	P23	23	13.716	0.000435	9.03e-05	0	0.678072	1.6	19.4	508
River	Miss	Jordan 1965	P24	24	11.2166	0.000435	9.03e-05	0	0.678072	1.56	19.4	508
River	Miss	Jordan 1965	P25	25	11.6434	0.000435	9.03e-05	0	0.678072	1.6	19.4	508
River	Miss	Jordan 1965	P26	26	10.4242	0.000435	9.03e-05	0	0.678072	1.54	19.4	508
River	Miss	Jordan 1965	P27	27	9.93648	0.000435	9.03e-05	0	0.678072	1.38	19.4	508
River	Miss	Jordan 1965	P28	28	9.144	0.000435	9.03e-05	0	0.678072	1.32	19.4	508
River	Miss	Jordan 1965	P29	29	8.65632	0.000435	9.03e-05	0	0.678072	1.27	19.4	508
River	Miss	Jordan 1965	P30	30	7.86	0.00039	8.929e-05	0	1.32769	1.3934	2.2	498
River	Miss	Jordan 1965	P31	31	9.69	0.00039	8.929e-05	0	1.32769	1.3934	2.2	498
River	Miss	Jordan 1965	P32	32	11.03	0.00039	8.929e-05	0	1.32769	1.3934	2.2	498
River	Miss	Jordan 1965	P33	33	12.04	0.00039	8.929e-05	0	1.32769	1.3934	2.2	498
River	Miss	Jordan 1965	P34	34	14.69	0.00039	8.929e-05	0	1.32769	1.3934	9.4	498
River	Miss	Jordan 1965	P35	35	12.74	0.00039	8.929e-05	0	1.32769	1.3934	9.4	498
River	Miss	Jordan 1965	P36	36	10.15	0.00044	0.000113	0	1.30451	1.64925	9.4	508
River	Miss	Jordan 1965	P37	37	11.8	0.00044	0.000113	0	1.30451	1.64925	9.4	508
River	Miss	Jordan 1965	P38	38	12.68	0.00044	0.000113	0	1.30451	1.64925	16.1	508
River	Miss	Jordan 1965	P39	39	13.17	0.00044	0.000113	0	1.30451	1.64925	16.1	508
River	Miss	Jordan 1965	P40	40	16.34	0.00044	0.000113	0	1.30451	1.64925	16.1	508
River	Miss	Jordan 1965	P41	41	15.06	0.00044	0.000113	0	1.30451	1.64925	16.1	508
River	Miss	Jordan 1965	P42	42	13.75	0.00044	0.000113	0	1.30451	1.64925	19.4	508
River	Miss	Jordan 1965	P43	43	6.19	0.000434	4.6e-05	0	1.5509	1.01517	19.4	485
River	Miss	Jordan 1965	P44	44	8.2	0.000434	4.6e-05	0	1.5509	1.01517	19.4	485
River	Miss	Jordan 1965	P45	45	8.93	0.000434	4.6e-05	0	1.5509	1.01517	19.4	485
River	Miss	Jordan 1965	P46	46	4.63	0.000189	8.808e-05	0	0.650765	1.1293	19.4	479
River	Miss	Jordan 1965	P47	47	5.03	0.000189	8.808e-05	0	0.650765	1.1293	19.4	479
River	Miss	Jordan 1965	P48	48	7.16	0.000189	8.808e-05	0	0.650765	1.1293	19.4	479
River	Miss	Jordan 1965	P49	49	8.69	0.000189	8.808e-05	0	0.650765	1.1293	19.4	479
River	Miss	Jordan 1965	P50	50	11.89	0.000189	8.808e-05	0	0.650765	1.1293	19.4	479
River	Miss	Jordan 1965	P51	51	8.38	0.000189	8.808e-05	0	0.650765	1.1293	19.4	479
River	Grand	Nordin & Dempster 1963	P1	52	0.780288	0.00032	0.000826	0	0.739848	0.947928	21.7	82.292
River	Grand	Nordin & Dempster 1964	P2	53	0.755904	0.00033	0.000826	0	0.978196	0.950976	16.7	82.292
River	Grand	Nordin & Dempster 1965	P3	54	0.515112	0.00031	0.000826	0	0.773996	0.896112	18.9	121
River	Grand	Nordin & Dempster 1966	P4	55	0.719328	0.00044	0.000826	0	0.933573	0.710184	21.7	114.599
River	Grand	Nordin & Dempster 1967	P5	56	0.752856	0.00027	0.000826	0	0.678072	0.819912	21.1	81.6824
River	Grand	Nordin & Dempster 1968	P6	57	0.432816	0.00027	0.000864	0	0.757023	0.597408	16.7	131.667
River	Grand	Nordin & Dempster 1969	P7	58	0.44196	0.00028	0.000864	0	0.790772	0.661416	17.2	112.77
River	Grand	Nordin & Dempster 1970	P8	59	0.466344	0.00029	0.000864	0	0.879706	0.576072	17.2	121.609
River	Grand	Nordin & Dempster 1971	P9	60	0.603504	0.00031	0.000864	0	0.903038	0.70104	16.7	80.7681
River	Grand	Nordin & Dempster 1972	P10	61	0.405384	0.00031	0.000864	0	0.887525	0.765048	20	132.277
River	Grand	Nordin & Dempster 1973	P11	62	0.597408	0.00034	0.000864	0	0.903038	0.57912	22.8	116.733
River	Grand	Nordin & Dempster 1974	P12	63	0.4572	0.00031	0.000864	0	0.879706	0.71628	22.8	122.219
River	Grand	Nordin & Dempster 1975	P13	64	0.59436	0.0003	0.000864	0	0.748461	0.8382	21.1	81.0728
River	Grand	Nordin & Dempster 1976	P14	65	0.466344	0.0002	0.000758	0	1.21412	0.79248	12.8	53.3374
River	Grand	Nordin & Dempster 1977	P15	66	0.3048	0.00017	0.000758	0	0.565597	0.88392	14.4	73.4532
River	Grand	Nordin & Dempster 1978	P16	67	0.201168	0.00017	0.00098	0	0.650765	0.719328	20	136.239
River	Grand	Nordin & Dempster 1979	P17	68	0.438912	0.0002	0.00098	0	0.748461	0.73152	22.2	61.5666
River	Grand	Nordin & Dempster 1980	P18	69	0.353568	0.00018	0.000844	0	0.713696	1.05156	20.6	67.6623
River	Grand	Nordin & Dempster 1981	P19	70	0.36576	0.00017	0.000844	0	0.575312	0.978408	19.4	71.0149
River	Grand	Nordin & Dempster 1982	P20	71	0.326136	0.00016	0.001	0	0.62293	0.762	22.8	99.6647
River	Grand	Nordin & Dempster 1983	P21	72	0.277368	0.00019	0.001	0	0.613532	0.765048	23.9	112.161
River	Grand	Nordin & Dempster 1984	P22	73	0.70104	0.00024	0.000855	0	0.731183	1.85014	22.2	78.6346
River	Grand	Nordin & Dempster 1985	P23	74	0.725424	0.00026	0.000855	0	0.650765	1.94158	24.4	71.3197
River	Ganges	Lupker et al. 2011	P1	75	10	0.0002	2.36925e-06	0	0.5	0.5	20	1500
River	Ganges	Lupker et al. 2012	P2	76	12	0.000259	7.46323e-05	0	0.5	2.1	20	1500
River	Ganges	Lupker et al. 2013	P3	77	14	0.000228	4.94934e-05	0	0.5	2.18	20	1500
River	Ganges	Lupker et al. 2014	P4	78	13	0.000269	1.27716e-05	0	0.5	1.08	20	1500
River	Ganges	Lupker et al. 2015	P5	79	10.5	0.000185	6.52144e-05	0	0.5	2.71	20	1500
River	Ganges	Lupker et al. 2016	P6	80	12.5	0.000177	6.52144e-05	0	0.5	2.13	20	1500
River	Ganges	Lupker et al. 2017	P7	81	10	0.000215	2.39006e-05	0	0.5	1.84	20	1500
River	Niobr	Hembree 1955	P1	82	0.3048	0.00025	0.00138258	0	0.5	1.0414	19	36
River	Niobr	Hembree 1956	P2	83	0.24384	0.00025	0.00138258	0	0.5	1.10947	19	36
River	Niobr	Hembree 1957	P3	84	0.24384	0.00025	0.00138258	0	0.5	0.987552	19	36
River	Niobr	Hembree 1958	P4	85	0.48768	0.00025	0.00138258	0	0.5	0.880872	19	36
River	Niobr	Hembree 1959	P5	86	0.4572	0.00025	0.00138258	0	0.5	1.02616	19	36
River	Niobr	Hembree 1960	P6	87	0.51816	0.00025	0.00123106	0	0.5	1.00178	19	37
River	Niobr	Hembree 1961	P7	88	0.64008	0.00025	0.00123106	0	0.5	0.912368	19	37
River	Niobr	Hembree 1962	P8	89	0.70104	0.00025	0.00123106	0	0.5	0.933704	19	37
River	Niobr	Hembree 1963	P9	90	0.64008	0.00025	0.00123106	0	0.5	0.636016	19	37
River	Niobr	Hembree 1964	P10	91	0.24384	0.00025	0.00123106	0	0.5	0.6096	19	37
River	Loup	Hubbell & Matejka 1959	P12	92	1.18872	0.000330645	0.00125	0	NaN	0.922528	17.8	19.5072
River	Loup	Hubbell & Matejka 1960	P13	93	1.15824	0.000330645	0.00125	0	NaN	0.814832	17.8	19.5072
River	Loup	Hubbell & Matejka 1961	P14	94	0.762	0.000330645	0.00125	0	NaN	1.05156	17.8	19.5072
River	Loup	Hubbell & Matejka 1962	P15	95	0.64008	0.000330645	0.00125	0	NaN	1.03937	17.8	19.5072
River	Loup	Hubbell & Matejka 1963	P16	96	0.33528	0.000330645	0.00125	0	NaN	0.693776	17.8	19.5072
River	Loup	Hubbell & Matejka 1964	P17	97	1.12776	0.000356061	0.00125	0	NaN	0.77724	23.3	19.5072
River	Loup	Hubbell & Matejka 1965	P18	98	1.12776	0.000356061	0.00125	0	NaN	0.824992	23.3	19.5072
River	Loup	Hubbell & Matejka 1966	P19	99	0.85344	0.000356061	0.00125	0	NaN	0.771144	23.3	19.5072
River	Loup	Hubbell & Matejka 1967	P20	100	0.4572	0.000356061	0.00125	0	NaN	0.81534	23.3	19.5072
River	Loup	Hubbell & Matejka 1968	P21	101	0.70104	0.000356061	0.00125	0	NaN	0.890016	23.3	19.5072
River	Loup	Hubbell & Matejka 1969	P22	102	1.00584	0.00052381	0.00130682	0	NaN	1.02209	8.9	17.3736
River	Loup	Hubbell & Matejka 1970	P23	103	0.85344	0.00052381	0.00130682	0	NaN	0.869867	8.9	17.3736
River	Loup	Hubbell & Matejka 1971	P24	104	0.70104	0.00052381	0.00130682	0	NaN	0.695893	8.9	17.3736
River	Loup	Hubbell & Matejka 1972	P25	105	0.51816	0.00052381	0.00130682	0	NaN	0.543667	8.9	17.3736
River	Loup	Hubbell & Matejka 1973	P26	106	0.51816	0.00052381	0.00130682	0	NaN	0.543667	8.9	17.3736
River	Loup	Hubbell & Matejka 1974	P27	107	0.64008	0.00045122	0.00132576	0	NaN	1.13693	22.3	17.3736
River	Loup	Hubbell & Matejka 1975	P28	108	0.762	0.00045122	0.00132576	0	NaN	1.18715	22.3	17.3736
River	Loup	Hubbell & Matejka 1976	P29	109	1.00584	0.00045122	0.00132576	0	NaN	1.35575	22.3	17.3736
River	Loup	Hubbell & Matejka 1977	P30	110	0.94488	0.00045122	0.00132576	0	NaN	1.32242	22.3	17.3736
River	Loup	Hubbell & Matejka 1978	P31	111	0.67056	0.00045122	0.00132576	0	NaN	1.25714	22.3	17.3736
River	Yellow	Moodie et al 2019	P12	112	2.5	0.00010127	6.4e-05	0	NaN	1.2528	20
River	Yellow	Moodie et al 2019	P13	113	2.19	0.00010127	6.4e-05	0	NaN	1.1726	20
River	Yellow	Moodie et al 2019	P14	114	2	0.00010127	6.4e-05	0	NaN	1.1206	20
River	Yellow	Moodie et al 2019	P15	115	1.55	0.00010127	6.4e-05	0	NaN	0.98648	20
River	Yellow	Moodie et al 2019	P16	116	1.8	0.00010127	6.4e-05	0	NaN	1.0631	20
River	Yellow	Moodie et al 2019	P17	117	2	0.00010127	6.4e-05	0	NaN	1.1206	20
River	Yellow	Moodie et al 2019	P18	118	1.8	0.00010127	6.4e-05	0	NaN	1.0631	20
River	Yellow	Moodie et al 2019	P19	119	1.65	0.00010127	6.4e-05	0	NaN	1.0178	20
River	Yellow	Moodie et al 2019	P20	120	3.1	0.00010127	6.4e-05	0	NaN	1.3951	20
River	Yellow	Moodie et al 2019	P21	121	2.32	0.00010127	6.4e-05	0	NaN	1.2069	20
River	Yellow	Moodie et al 2019	P22	122	2.4	0.00010127	6.4e-05	0	NaN	1.2275	20
River	Yellow	Moodie et al 2019	P23	123	4	0.00010127	6.4e-05	0	NaN	1.5847	20
River	Yellow	Moodie et al 2019	P24	124	2.53	0.00010127	6.4e-05	0	NaN	1.2603	20
River	Yellow	Moodie et al 2019	P25	125	2.15	0.00010127	6.4e-05	0	NaN	1.1618	20
River	Yellow	Moodie et al 2019	P26	126	2.2	0.00010127	6.4e-05	0	NaN	1.1753	20
River	Yellow	Moodie et al 2019	P27	127	2.3	0.00010127	6.4e-05	0	NaN	1.2017	20
River	Yellow	Moodie et al 2019	P28	128	2.68	0.00010127	6.4e-05	0	NaN	1.2972	20
River	Yellow	Moodie et al 2019	P29	129	1.7	0.00010127	6.4e-05	0	NaN	1.0331	20
River	Yellow	Moodie et al 2019	P30	130	2.2	0.00010127	6.4e-05	0	NaN	1.1753	20
River	Yellow	Moodie et al 2019	P31	131	2.17	0.00010127	6.4e-05	0	NaN	1.1672	20
River	Yellow	Moodie et al 2019	P32	132	2.83	0.00010127	6.4e-05	0	NaN	1.333	20
River	Yellow	Moodie et al 2019	P33	133	3.14	0.00010127	6.4e-05	0	NaN	1.4041	20
River	Yellow	Moodie et al 2019	P34	134	2.65	0.00010127	6.4e-05	0	NaN	1.2899	20
River	Yellow	Moodie et al 2019	P35	135	7.5	0.00010127	6.4e-05	0	NaN	2.17	20
River	Yellow	Moodie et al 2019	P36	136	7.65	0.00010127	6.4e-05	0	NaN	2.1916	20
River	Yellow	Moodie et al 2019	P37	137	1.9	0.00010127	6.4e-05	0	NaN	1.0922	20
River	Yellow	Moodie et al 2019	P38	138	1.6	0.00010127	6.4e-05	0	NaN	1.0023	20
River	Yellow	Moodie et al 2019	P39	139	2.74	0.00010127	6.4e-05	0	NaN	1.3116	20
River	Yellow	Moodie et al 2019	P40	140	2.6	0.00010127	6.4e-05	0	NaN	1.2776	20
River	Yellow	Moodie et al 2019	P41	141	3.6	0.00010127	6.4e-05	0	NaN	1.5034	20
River	Yellow	Moodie et al 2019	P42	142	3.3	0.00010127	6.4e-05	0	NaN	1.4394	20
River	Yellow	Moodie et al 2019	P43	143	4.99	0.00010127	6.4e-05	0	NaN	1.77	20
River	Yellow	Moodie et al 2019	P44	144	5	0.00010127	6.4e-05	0	NaN	1.7718	20
River	Yellow	Moodie et al 2019	P45	145	2.4	0.00010127	6.4e-05	0	NaN	1.2275	20
River	Yellow	Moodie et al 2019	P46	146	2	0.00010127	6.4e-05	0	NaN	1.1206	20
River	Fraser	Haught et al 2017	P1	147	12.56	0.000304	7e-05	0	NaN	1.50414	20
River	Fraser	Haught et al 2017	P2	148	13.04	0.000304	7e-05	0	NaN	1.44827	20
River	Fraser	Haught et al 2017	P3	149	12.34	0.000304	7e-05	0	NaN	1.54756	20
River	Fraser	Haught et al 2017	P4	150	13.01	0.000304	7e-05	0	NaN	1.31038	20
River	Fraser	Haught et al 2017	P5	151	12.5	0.000304	7e-05	0	NaN	0.959277	20
River	Fraser	Haught et al 2017	P6	152	13.6	0.000304	7e-05	0	NaN	1.18889	20
River	Fraser	Haught et al 2017	P7	153	13	0.000304	7e-05	0	NaN	1.36613	20
River	Fraser	Haught et al 2017	P8	154	14.5	0.000304	7e-05	0	NaN	1.10289	20
River	Fraser	Haught et al 2017	P9	155	13.6	0.000304	7e-05	0	NaN	1.08251	20
River	Fraser	Haught et al 2017	P10	156	13	0.000304	7e-05	0	NaN	1.32996	20
River	Fraser	Haught et al 2017	P11	157	12.1	0.000304	7e-05	0	NaN	0.970694	20
River	Fraser	Haught et al 2017	P12	158	12.1	0.000304	7e-05	0	NaN	1.26643	20
River	Fraser	Haught et al 2017	P13	159	12.3	0.000304	7e-05	0	NaN	1.04432	20
River	Fraser	Haught et al 2017	P14	160	13.3	0.000304	7e-05	0	NaN	1.02515	20
River	Fraser	Haught et al 2017	P15	161	11.6	0.000304	7e-05	0	NaN	1.29738	20
River	Fraser	Haught et al 2017	P16	162	11.3	0.000304	7e-05	0	NaN	0.876163	20
River	Fraser	Haught et al 2017	P17	163	10.9	0.000304	7e-05	0	NaN	1.07391	20
River	Fraser	Haught et al 2017	P18	164	11.4	0.000304	7e-05	0	NaN	0.97704	20
River	Fraser	Haught et al 2017	P19	165	10	0.000304	7e-05	0	NaN	1.11731	20
River	Fraser	Haught et al 2017	P20	166	11.6	0.000304	7e-05	0	NaN	1.04277	20
River	Fraser	Haught et al 2017	P21	167	10.5	0.000304	7e-05	0	NaN	0.498614	20
River	Fraser	Haught et al 2017	P22	168	9.3	0.000304	7e-05	0	NaN	0.687106	20
River	Fraser	Haught et al 2017	P23	169	10.15	0.000304	7e-05	0	NaN	0.665165	20
River	Fraser	Haught et al 2017	P24	170	9.3	0.000304	7e-05	0	NaN	0.396439	20
River	Fraser	Haught et al 2017	P25	171	8.7	0.000304	7e-05	0	NaN	0.654211	20
Exp	Barton55	Barton55	R1	172	0.237744	0.00018	0.00088	0.0225552	0	0.435864	20
Exp	Barton55	Barton55	R3	173	0.170688	0.00018	0.00086	0.0280416	0	0.408432	20
Exp	Barton55	Barton55	R5	174	0.192024	0.00018	0.000866	0.0185928	0	0.423672	20
Exp	Barton55	Barton55	R6	175	0.210312	0.00018	0.00088	0.0216408	0	0.44196	20
Exp	Barton55	Barton55	R7	176	0.256032	0.00018	0.00088	0.025908	0	0.499872	20
Exp	Barton55	Barton55	R10	177	0.155448	0.00018	0.00088	0.03048	0	0.298704	20
Exp	Barton55	Barton55	R11	178	0.140208	0.00018	0.00087	0.0292608	0	0.248412	20
Exp	Barton55	Barton55	R12	179	0.201168	0.00018	0.00044	0.0192024	0	0.225552	20
Exp	Barton55	Barton55	R13	180	0.164592	0.00018	0.00045	0.0161544	0	0.216408	20
Exp	Barton55	Barton55	R15	181	0.13716	0.00018	0.0015	0.019812	0	0.4572	20
Exp	Barton55	Barton55	R16	182	0.12192	0.00018	0.00158	0.021336	0	0.362712	20
Exp	Barton55	Barton55	R17	183	0.109728	0.00018	0.00161	0.016764	0	0.283464	20
Exp	Barton55	Barton55	R18	184	0.210312	0.00018	0.00156	0	0	0.816864	20
Exp	Barton55	Barton55	R19	185	0.2286	0.00018	0.00167	0	0	0.9144	20
Exp	Barton55	Barton55	R20	186	0.185928	0.00018	0.00166	0	0	0.835152	20
Exp	Barton55	Barton55	R21	187	0.09144	0.00018	0.0016	0.0155448	0	0.2286	20
Exp	Barton55	Barton55	R22	188	0.231648	0.00018	0.0017	0	0	0.911352	20
Exp	Barton55	Barton55	R23	189	0.19812	0.00018	0.00183	0	0	0.865632	20
Exp	Barton55	Barton55	R25	190	0.237744	0.00018	0.00124	0	0	0.79248	20
Exp	Barton55	Barton55	R26	191	0.210312	0.00018	0.00125	0	0	0.786384	20
Exp	Barton55	Barton55	R27	192	0.12192	0.00018	0.00135	0.01524	0	0.399288	20
Exp	Barton55	Barton55	R28	193	0.146304	0.00018	0.00116	0.021336	0	0.423672	20
Exp	Barton55	Barton55	R29	194	0.18288	0.00018	0.00121	0	0	0.734568	20
Exp	Barton55	Barton55	R31	195	0.124968	0.00018	0.00129	0	0	0.780288	20
Exp	Barton55	Barton55	R32	196	0.222504	0.00018	0.00082	0.021336	0	0.432816	20
Exp	Barton55	Barton55	R33	197	0.313944	0.00018	0.00061	0.019812	0	0.5334	20
Exp	Barton55	Barton55	R34	198	0.420624	0.00018	0.00065	0.021336	0	0.48768	20
Exp	Barton55	Barton55	R35	199	0.170688	0.00018	0.0016	0	0	0.981456	20
Exp	Barton55	Barton55	R36	200	0.161544	0.00018	0.0021	0	0	1.09728	20
Exp	Brooks54	Brooks54	R2	201	0.0755904	0.00016	0.0018	0	0	0.666598	20
Exp	Brooks54	Brooks54	R3	202	0.0740664	0.00016	0.0025	0	0	0.628323	20
Exp	Brooks54	Brooks54	R4	203	0.0719328	0.00016	0.0024	0	0	0.658029	20
Exp	Brooks54	Brooks54	R6	204	0.059436	0.00016	0.0024	0	0	0.632968	20
Exp	Brooks54	Brooks54	R7	205	0.0740664	0.00016	0.0021	0	0	0.632242	20
Exp	Brooks54	Brooks54	R21	206	0.0719328	0.0001	0.00225	0	0	0.632079	20
Exp	Brooks54	Brooks54	R29	207	0.085344	0.0001	0.00185	0	0	0.638048	20
Exp	Cellino98	Cellino98	R1	208	0.12	0.000135	0.0003	0	0	0.68	20
Exp	Cellino98	Cellino98	R2	209	0.12	0.000135	0.0005	0	0	0.806	20
Exp	Cellino98	Cellino98	R3	210	0.12	0.000135	0.00075	0	0	0.829	20
Exp	Cellino98	Cellino98	R4	211	0.12	0.000135	0.001	0	0	0.792	20
Exp	Cellino98	Cellino98	R5	212	0.12	0.000135	0.00125	0	0	0.824	20
Exp	Cellino98	Cellino98	R6	213	0.12	0.000135	0.0015	0	0	0.858	20
Exp	Cellino98	Cellino98	R7	214	0.12	0.000135	0.00175	0	0	0.855	20
Exp	Cellino98	Cellino98	R8	215	0.12	0.000135	0.002	0	0	0.905	20
Exp	Cellino98	Cellino98	R9	216	0.12	0.000135	0.00225	0	0	0.916	20
Exp	Cellino98	Cellino98	R10	217	0.12	0.000135	0.0025	0	0	0.917	20
Exp	Cellino98	Cellino98	R11	218	0.12	0.000135	0.003	0	0	0.897	20
Exp	Cellino98	Cellino98	R12	219	0.12	0.00021	0.001	0	0	0.801	20
Exp	Cellino98	Cellino98	R13	220	0.12	0.00021	0.0015	0	0	0.833	20
Exp	Cellino98	Cellino98	R14	221	0.12	0.00021	0.00175	0	0	0.836	20
Exp	Cellino98	Cellino98	R15	222	0.12	0.00021	0.002	0	0	0.85	20
Exp	Cellino98	Cellino98	R16	223	0.12	0.00021	0.00225	0	0	0.865	20
Exp	Cellino98	Cellino98	R17	224	0.12	0.00021	0.0025	0	0	0.868	20
Exp	Lyn86	Lyn86	R1	225	0.0645	0.00015	0.00244	0	0	0.649	20
Exp	Lyn86	Lyn86	R2	226	0.0645	0.00019	0.00251	0	0	0.671	20
Exp	Lyn86	Lyn86	R3	227	0.0645	0.00024	0.00296	0	0	0.744	20
Exp	Coleman86	Coleman86	R20	228	0.17	0.000105	0.002	0	0	1.07	20
Exp	Coleman86	Coleman86	R31	229	0.172	0.00021	0.002	0	0	1.07	20
Exp	Coleman86	Coleman86	R40	230	0.171	0.00042	0.0022	0	0	1.11	20
Exp	Sumer96	Sumer96	R142	231	0.1032	0.00013	0.00479	0	0	0.83	20
Exp	Sumer96	Sumer96	R150	232	0.1009	0.00013	0.00726	0	0	1.02	20
Exp	Sumer96	Sumer96	R155	233	0.1046	0.00013	0.00883	0	0	1.14	20
River	Miss	Nittrouer et al. 2011	S1	234	15.07	0.000166	2e-05	2.74	NaN	1.23	20	1000
River	Miss	Nittrouer et al. 2011	S2	235	21.49	0.000192	2e-05	2.21	NaN	1.1	20	1000
River	Miss	Nittrouer et al. 2011	S3	236	32.38	0.000174	2e-05	2.27	NaN	0.97	20	1000
River	Miss	Nittrouer et al. 2011	S4	237	12.96	0.000266	2e-05	1.81	NaN	0.97	20	1000
River	Miss	Nittrouer et al. 2011	S5	238	17.72	0.000216	2e-05	2.31	NaN	1.1	20	1000
River	Miss	Nittrouer et al. 2011	S6	239	27.83	0.000168	2e-05	2.31	NaN	1.23	20	1000
River	Miss	Nittrouer et al. 2011	S7	240	28.91	0.000169	2e-05	2.58	NaN	1.23	20	1000
River	Miss	Nittrouer et al. 2011	S8	241	20.88	0.000244	2e-05	2.6	NaN	1.1	20	1000
River	Miss	Nittrouer et al. 2011	S9	242	22.18	0.000196	2e-05	1.81	NaN	0.97	20	1000

## Sheet: profiles
Type	River/exp name	id	profile no	sample number (1 is closest to bed)	Number of grain size bins	Height above bed (m)	Volumetric sediment concentraiton, C	Mass fraction of sediment sample within each grain size bin (see bins tab for size classes)
River	Miss	P1	1	1	12	0.3048	8.22642e-05	0	0	0	0.78	0.06	0.16	0	0	0	0	0	0
River	Miss	P1	1	2	12	0.36576	0.000110566	0	0	0	0.65	0.11	0.24	0	0	0	0	0	0
River	Miss	P1	1	3	12	0.70104	7.09434e-05	0	0	0	0.86	0.05	0.09	0	0	0	0	0	0
River	Miss	P1	1	4	12	1.40208	7.62264e-05	0	0	0	0.9	0.06	0.04	0	0	0	0	0	0
River	Miss	P1	1	5	12	2.1336	6.15094e-05	0	0	0	0.96	0.02	0.02	0	0	0	0	0	0
River	Miss	P1	1	6	12	3.16992	6.26415e-05	0	0	0	0.97	0.02	0.01	0	0	0	0	0	0
River	Miss	P2	2	1	12	0.3048	7.16981e-05	0	0	0	0.71	0.09	0.2	0	0	0	0	0	0
River	Miss	P2	2	2	12	0.4572	6.18868e-05	0	0	0	0.79	0.06	0.15	0	0	0	0	0	0
River	Miss	P2	2	3	12	0.9144	6.18868e-05	0	0	0	0.82	0.05	0.13	0	0	0	0	0	0
River	Miss	P2	2	4	12	1.85928	6.11321e-05	0	0	0	0.82	0.09	0.09	0	0	0	0	0	0
River	Miss	P2	2	5	12	2.77368	5.77358e-05	0	0	0	0.9	0.05	0.05	0	0	0	0	0	0
River	Miss	P2	2	6	12	4.17576	4.71698e-05	0	0	0	0.95	0.04	0.01	0	0	0	0	0	0
River	Miss	P3	3	1	12	0.3048	4.03774e-05	0	0	0	0.53	0.05	0.42	0	0	0	0	0	0
River	Miss	P3	3	2	12	0.73152	3.77358e-05	0	0	0	0.55	0.1	0.35	0	0	0	0	0	0
River	Miss	P3	3	3	12	1.43256	4.56604e-05	0	0	0	0.5	0.11	0.39	0	0	0	0	0	0
River	Miss	P3	3	4	12	2.8956	3.16981e-05	0	0	0	0.69	0.1	0.21	0	0	0	0	0	0
River	Miss	P3	3	5	12	4.32816	2.41509e-05	0	0	0	0.77	0.12	0.11	0	0	0	0	0	0
River	Miss	P3	3	6	12	6.49224	1.88679e-05	0	0	0	0.83	0.13	0.04	0	0	0	0	0	0
River	Miss	P4	4	1	12	0.3048	5.20755e-05	0	0	0	0.76	0.05	0.16	0.03	0	0	0	0	0
River	Miss	P4	4	2	12	0.36576	4.33962e-05	0	0	0	0.75	0.1	0.13	0.02	0	0	0	0	0
River	Miss	P4	4	3	12	0.73152	4.56604e-05	0	0	0	0.75	0.09	0.16	0	0	0	0	0	0
River	Miss	P4	4	4	12	1.46304	3.88679e-05	0	0	0	0.82	0.1	0.08	0	0	0	0	0	0
River	Miss	P4	4	5	12	2.16408	3.84906e-05	0	0	0	0.85	0.07	0.08	0	0	0	0	0	0
River	Miss	P4	4	6	12	3.26136	3.84906e-05	0	0	0	0.98	0.02	0	0	0	0	0	0	0
River	Miss	P5	5	1	12	0.3048	4.22642e-05	0	0	0	0.68	0.09	0.23	0	0	0	0	0	0
River	Miss	P5	5	2	12	0.88392	3.69811e-05	0	0	0	0.7	0.13	0.17	0	0	0	0	0	0
River	Miss	P5	5	3	12	1.73736	3.01887e-05	0	0	0	0.83	0.1	0.07	0	0	0	0	0	0
River	Miss	P5	5	4	12	2.62128	3.32075e-05	0	0	0	0.87	0.04	0.09	0	0	0	0	0	0
River	Miss	P5	5	5	12	3.93192	2.9434e-05	0	0	0	0.97	0.03	0	0	0	0	0	0	0
River	Miss	P6	6	1	12	0.3048	2.5283e-05	0	0	0	0.54	0.1	0.31	0.05	0	0	0	0	0
River	Miss	P6	6	2	12	0.67056	3.54717e-05	0	0	0	0.53	0.08	0.39	0	0	0	0	0	0
River	Miss	P6	6	3	12	1.3716	3.01887e-05	0	0	0	0.58	0.06	0.28	0.08	0	0	0	0	0
River	Miss	P6	6	4	12	2.71272	2.26415e-05	0	0	0	0.7	0.12	0.18	0	0	0	0	0	0
River	Miss	P6	6	5	12	4.08432	1.84906e-05	0	0	0	0.86	0.11	0.03	0	0	0	0	0	0
River	Miss	P6	6	6	12	6.12648	1.73585e-05	0	0	0	0.86	0.14	0	0	0	0	0	0	0
River	Miss	P7	7	1	12	0.3048	3.39623e-05	0	0	0	0.36	0.16	0.38	0.1	0	0	0	0	0
River	Miss	P7	7	2	12	0.54864	3.58491e-05	0	0	0	0.36	0.11	0.49	0.04	0	0	0	0	0
River	Miss	P7	7	3	12	1.12776	2.60377e-05	0	0	0	0.52	0.13	0.34	0.01	0	0	0	0	0
River	Miss	P7	7	4	12	2.25552	2.26415e-05	0	0	0	0.64	0.13	0.23	0	0	0	0	0	0
River	Miss	P7	7	5	12	3.38328	1.73585e-05	0	0	0	0.66	0.16	0.18	0	0	0	0	0	0
River	Miss	P7	7	6	12	5.05968	2.30189e-05	0	0	0	0.87	0.06	0.07	0	0	0	0	0	0
River	Miss	P8	8	1	12	0.3048	0.000262642	0.2	0	0.2	0.13	0.08	0.25	0.14	0	0	0	0	0
River	Miss	P8	8	2	12	0.85344	0.000191698	0.23	0	0.24	0.16	0.12	0.23	0.02	0	0	0	0	0
River	Miss	P8	8	3	12	1.70688	0.000158868	0.25	0	0.33	0.2	0.08	0.13	0.01	0	0	0	0	0
River	Miss	P8	8	4	12	3.38328	0.000156604	0.25	0	0.31	0.22	0.08	0.14	0	0	0	0	0	0
River	Miss	P8	8	5	12	5.09016	0.000133585	0.28	0	0.38	0.23	0.05	0.06	0	0	0	0	0	0
River	Miss	P8	8	6	12	7.62	0.000135472	0.31	0	0.32	0.26	0.05	0.06	0	0	0	0	0	0
River	Miss	P9	9	1	12	0.3048	0.000331321	0.09	0	0.11	0.02	0.12	0.54	0.1	0	0	0	0	0
River	Miss	P9	9	2	12	0.82296	0.000210566	0.16	0	0.14	0.09	0.13	0.42	0.06	0	0	0	0	0
River	Miss	P9	9	3	12	1.64592	0.000158491	0.16	0	0.24	0.11	0.12	0.36	0.01	0	0	0	0	0
River	Miss	P9	9	4	12	3.29184	0.000163774	0.22	0	0.21	0.07	0.13	0.33	0.04	0	0	0	0	0
River	Miss	P9	9	5	12	4.93776	0.000125283	0.29	0	0.19	0.21	0.08	0.19	0.04	0	0	0	0	0
River	Miss	P9	9	6	12	7.40664	0.000102642	0.3	0	0.34	0.17	0.04	0.15	0	0	0	0	0	0
River	Miss	P10	10	1	12	0.3048	0.000221509	0.12	0	0.19	0.03	0.05	0.5	0.11	0	0	0	0	0
River	Miss	P10	10	2	12	1.34112	0.000195849	0.12	0	0.21	0.04	0.03	0.48	0.09	0	0	0	0	0
River	Miss	P10	10	3	12	2.68224	0.000142264	0.23	0	0.28	0.06	0.03	0.35	0.05	0	0	0	0	0
River	Miss	P10	10	4	12	5.36448	0.000119623	0.29	0	0.29	0.09	0.03	0.3	0	0	0	0	0	0
River	Miss	P10	10	5	12	8.01624	9.24528e-05	0.34	0	0.37	0.12	0.06	0.11	0	0	0	0	0	0
River	Miss	P10	10	6	12	12.0396	9.4717e-05	0.04	0	0.64	0.17	0.05	0.09	0.01	0	0	0	0	0
River	Miss	P11	11	1	12	0.3048	0.000171698	0.19	0	0.2	0.07	0.03	0.37	0.14	0	0	0	0	0
River	Miss	P11	11	2	12	0.94488	0.000137358	0.22	0	0.29	0.05	0.06	0.26	0.12	0	0	0	0	0
River	Miss	P11	11	3	12	1.85928	0.000129434	0.26	0	0.31	0.09	0.02	0.26	0.06	0	0	0	0	0
River	Miss	P11	11	4	12	3.71856	0.000116604	0.32	0	0.33	0.07	0.05	0.21	0.01	0	0	0	0	0
River	Miss	P11	11	5	12	5.60832	9.88679e-05	0.32	0	0.34	0.12	0.07	0.12	0.03	0	0	0	0	0
River	Miss	P11	11	6	12	8.382	8.45283e-05	0.38	0	0.45	0.1	0.02	0.05	0	0	0	0	0	0
River	Miss	P12	12	1	12	0.3048	0.000475472	0.11	0	0.19	0.41	0.05	0.12	0.09	0	0	0	0	0
River	Miss	P12	12	2	12	0.85344	0.000388679	0.16	0	0.2	0.5	0.05	0.08	0.01	0	0	0	0	0
River	Miss	P12	12	3	12	1.70688	0.000372453	0.17	0	0.2	0.52	0.04	0.06	0.01	0	0	0	0	0
River	Miss	P12	12	4	12	3.38328	0.00033434	0.18	0	0.22	0.56	0.02	0.02	0	0	0	0	0	0
River	Miss	P12	12	5	12	5.09016	0.000334717	0.21	0	0.21	0.55	0.02	0.01	0	0	0	0	0	0
River	Miss	P12	12	6	12	7.62	0.000316226	0.24	0	0.18	0.55	0.03	0	0	0	0	0	0	0
River	Miss	P13	13	1	12	0.3048	0.000456604	0.12	0	0.1	0.3	0.08	0.38	0.02	0	0	0	0	0
River	Miss	P13	13	2	12	0.82296	0.000338868	0.14	0	0.14	0.37	0.07	0.21	0.06	0	0	0	0	0
River	Miss	P13	13	3	12	1.64592	0.000308302	0.17	0	0.16	0.43	0.08	0.15	0.01	0	0	0	0	0
River	Miss	P13	13	4	12	3.29184	0.000250189	0.17	0	0.19	0.49	0.04	0.11	0	0	0	0	0	0
River	Miss	P13	13	5	12	4.93776	0.00022566	0.19	0	0.2	0.51	0.03	0.07	0	0	0	0	0	0
River	Miss	P13	13	6	12	7.40664	0.000198491	0.22	0	0.21	0.53	0.03	0.01	0	0	0	0	0	0
River	Miss	P14	14	1	12	0.3048	0.000189057	0.12	0	0.08	0.2	0.09	0.36	0.15	0	0	0	0	0
River	Miss	P14	14	2	12	1.34112	0.000118491	0.24	0	0.11	0.31	0.08	0.24	0.02	0	0	0	0	0
River	Miss	P14	14	3	12	2.68224	0.000128302	0.18	0	0.09	0.29	0.07	0.34	0.03	0	0	0	0	0
River	Miss	P14	14	4	12	5.36448	8.90566e-05	0.16	0	0.1	0.44	0.06	0.24	0	0	0	0	0	0
River	Miss	P14	14	5	12	8.01624	0.000120755	0.2	0	0.14	0.26	0.09	0.29	0.02	0	0	0	0	0
River	Miss	P14	14	6	12	12.0396	7.73585e-05	0.32	0	0.12	0.46	0.04	0.06	0	0	0	0	0	0
River	Miss	P15	15	1	12	0.3048	0.000309811	0.04	0	0.07	0.13	0.01	0.36	0.39	0	0	0	0	0
River	Miss	P15	15	2	12	1.00584	0.000142264	0.08	0	0.15	0.21	0.01	0.32	0.23	0	0	0	0	0
River	Miss	P15	15	3	12	2.01168	0.000110566	0.15	0	0.14	0.31	0.01	0.32	0.07	0	0	0	0	0
River	Miss	P15	15	4	12	3.99288	7.16981e-05	0.04	0	0.34	0.41	0.07	0.13	0.01	0	0	0	0	0
River	Miss	P15	15	5	12	6.00456	6.22642e-05	0.14	0	0.37	0.35	0.09	0.05	0	0	0	0	0	0
River	Miss	P15	15	6	12	8.9916	6e-05	0.16	0	0.21	0.63	0	0	0	0	0	0	0	0
River	Miss	P16	16	1	12	0.3048	0.000811321	0.53	0.05	0.14	0.17	0.03	0.08	0	0	0	0	0	0
River	Miss	P16	16	2	12	0.79248	0.000728302	0.52	0.07	0.13	0.22	0.02	0.04	0	0	0	0	0	0
River	Miss	P16	16	3	12	1.58496	0.000720755	0.52	0.06	0.19	0.18	0.02	0.03	0	0	0	0	0	0
River	Miss	P16	16	4	12	3.13944	0.000698113	0.53	0.08	0.19	0.18	0.01	0.01	0	0	0	0	0	0
River	Miss	P16	16	5	12	4.7244	0.000649057	0.59	0.08	0.15	0.17	0.01	0	0	0	0	0	0	0
River	Miss	P16	16	6	12	7.07136	0.000667925	0.56	0.08	0.18	0.17	0.01	0	0	0	0	0	0	0
River	Miss	P17	17	1	12	0.3048	0.0006	0.51	0.07	0.15	0.2	0.02	0.05	0	0	0	0	0	0
River	Miss	P17	17	2	12	0.79248	0.000584906	0.61	0.02	0.17	0.14	0.03	0.03	0	0	0	0	0	0
River	Miss	P17	17	3	12	1.55448	0.000550943	0.57	0.08	0.15	0.17	0.02	0.01	0	0	0	0	0	0
River	Miss	P17	17	4	12	3.13944	0.000345283	0.58	0.11	0.05	0.24	0.01	0.01	0	0	0	0	0	0
River	Miss	P17	17	5	12	4.69392	0.000558491	0.6	0.07	0.17	0.15	0.01	0	0	0	0	0	0	0
River	Miss	P17	17	6	12	7.04088	0.000543396	0.63	0.01	0.16	0.2	-0.17	0.17	0	0	0	0	0	0
River	Miss	P18	18	1	12	0.3048	0.000381132	0.5	0.03	0.11	0.14	0.05	0.16	0.01	0	0	0	0	0
River	Miss	P18	18	2	12	1.18872	0.000422642	0.47	0.05	0.05	0.21	0.05	0.16	0.01	0	0	0	0	0
River	Miss	P18	18	3	12	2.37744	0.000293208	0.44	0.09	0.05	0.27	0.04	0.11	0	0	0	0	0	0
River	Miss	P18	18	4	12	4.7244	0.000267547	0.47	0.09	0.2	0.14	0.04	0.06	0	0	0	0	0	0
River	Miss	P18	18	5	12	7.10184	0.000240755	0.53	0.11	0.08	0.22	0.03	0.03	0	0	0	0	0	0
River	Miss	P18	18	6	12	10.6375	0.000176226	0.53	0.18	0.06	0.22	0.01	0	0	0	0	0	0	0
River	Miss	P19	19	1	12	0.3048	0.000117736	0	0.32	0.12	0.15	0.26	0.13	0.02	0	0	0	0	0
River	Miss	P19	19	2	12	0.9144	8.71698e-05	0	0.54	0.06	0.16	0.11	0.13	0	0	0	0	0	0
River	Miss	P19	19	3	12	1.8288	9.24528e-05	0	0.51	0.07	0.23	0.19	0	0	0	0	0	0	0
River	Miss	P19	19	4	12	3.6576	9.58491e-05	0	0.72	0	0.28	0	0	0	0	0	0	0	0
River	Miss	P19	19	5	12	5.4864	7.28302e-05	0	0.64	0.15	0.21	0	0	0	0	0	0	0	0
River	Miss	P19	19	6	12	8.2296	6.22642e-05	0	0.82	0	0.18	0	0	0	0	0	0	0	0
River	Miss	P20	20	1	12	1.28016	0.000334717	0	0	0	0.83	0.07	0.06	0.04	0	0	0	0	0
River	Miss	P20	20	2	12	2.52984	0.000305283	0	0	0	0.9	0.07	0.03	0	0	0	0	0	0
River	Miss	P20	20	3	12	5.09016	0.000328302	0	0	0	0.83	0.08	0.07	0.02	0	0	0	0	0
River	Miss	P20	20	4	12	7.62	0.000276226	0	0	0	0.95	0.05	0	0	0	0	0	0	0
River	Miss	P20	20	5	12	11.43	0.000269057	0	0	0	0.95	0.04	0.01	0	0	0	0	0	0
River	Miss	P21	21	1	12	1.18872	0.000418868	0	0	0	0.77	0.05	0.07	0.11	0	0	0	0	0
River	Miss	P21	21	2	12	2.40792	0.000353208	0	0	0	0.84	0.05	0.07	0.04	0	0	0	0	0
River	Miss	P21	21	3	12	4.81584	0.000449057	0	0	0	0.9	0.02	0.04	0.04	0	0	0	0	0
River	Miss	P21	21	4	12	7.19328	0.00030566	0	0	0	0.94	0.04	0.01	0.01	0	0	0	0	0
River	Miss	P21	21	5	12	10.8204	0.000311698	0	0	0	0.94	0.03	0.03	0	0	0	0	0	0
River	Miss	P22	22	1	12	1.34112	0.000418868	0	0	0	0.85	0.05	0.07	0.03	0	0	0	0	0
River	Miss	P22	22	2	12	2.71272	0.000407547	0	0	0	0.89	0.04	0.06	0.01	0	0	0	0	0
River	Miss	P22	22	3	12	5.42544	0.000392453	0	0	0	0.89	0.03	0.06	0.02	0	0	0	0	0
River	Miss	P22	22	4	12	8.10768	0.000381132	0	0	0	0.92	0.03	0.04	0.01	0	0	0	0	0
River	Miss	P22	22	5	12	12.192	0.000355472	0	0	0	0.95	0.03	0.02	0	0	0	0	0	0
River	Miss	P23	23	1	12	1.3716	0.000483019	0	0	0	0.89	0.03	0.06	0.02	0	0	0	0	0
River	Miss	P23	23	2	12	2.7432	0.000516981	0	0	0	0.83	0.04	0.07	0.06	0	0	0	0	0
River	Miss	P23	23	3	12	5.4864	0.000433962	0	0	0	0.94	0.03	0.02	0.01	0	0	0	0	0
River	Miss	P23	23	4	12	8.2296	0.000426415	0	0	0	0.96	0.02	0.02	0	0	0	0	0	0
River	Miss	P23	23	5	12	12.3444	0.0004	0	0	0	0.97	0.02	0.01	0	0	0	0	0	0
River	Miss	P24	24	1	12	1.12776	0.000569811	0	0	0	0.89	0.02	0.07	0.02	0	0	0	0	0
River	Miss	P24	24	2	12	2.25552	0.000566038	0	0	0	0.9	0.02	0.06	0.02	0	0	0	0	0
River	Miss	P24	24	3	12	4.48056	0.000539623	0	0	0	0.92	0.02	0.05	0.01	0	0	0	0	0
River	Miss	P24	24	4	12	6.73608	0.000483019	0	0	0	0.96	0.02	0.02	0	0	0	0	0	0
River	Miss	P24	24	5	12	10.0889	0.000479245	0	0	0	0.97	0.01	0.02	0	0	0	0	0	0
River	Miss	P25	25	1	12	1.15824	0.000754717	0	0	0	0.78	0.02	0.05	0.15	0	0	0	0	0
River	Miss	P25	25	2	12	2.31648	0.000626415	0	0	0	0.94	0.02	0.03	0.01	0	0	0	0	0
River	Miss	P25	25	3	12	4.66344	0.000611321	0	0	0	0.97	0.01	0.02	0	0	0	0	0	0
River	Miss	P25	25	4	12	6.97992	0.000637736	0	0	0	0.96	0.01	0.03	0	0	0	0	0	0
River	Miss	P25	25	5	12	10.4851	0.000539623	0	0	0	0.99	0.01	0	0	0	0	0	0	0
River	Miss	P26	26	1	12	1.03632	0.000773585	0	0	0	0.9	0.02	0.06	0.02	0	0	0	0	0
River	Miss	P26	26	2	12	2.07264	0.000762264	0	0	0	0.93	0.02	0.05	0	0	0	0	0	0
River	Miss	P26	26	3	12	4.17576	0.000758491	0	0	0	0.94	0.02	0.04	0	0	0	0	0	0
River	Miss	P26	26	4	12	6.2484	0.000713208	0	0	0	0.96	0.02	0.02	0	0	0	0	0	0
River	Miss	P26	26	5	12	9.38784	0.000660377	0	0	0	0.98	0.01	0.01	0	0	0	0	0	0
River	Miss	P27	27	1	12	1.00584	0.000833962	0	0	0	0.94	0.01	0.04	0.01	0	0	0	0	0
River	Miss	P27	27	2	12	1.9812	0.000811321	0	0	0	0.94	0.02	0.04	0	0	0	0	0	0
River	Miss	P27	27	3	12	3.9624	0.000792453	0	0	0	0.97	0.01	0.02	0	0	0	0	0	0
River	Miss	P27	27	4	12	5.97408	0.000815094	0	0	0	0.97	0.01	0.02	0	0	0	0	0	0
River	Miss	P27	27	5	12	8.93064	0.000784906	0	0	0	0.98	0.01	0.01	0	0	0	0	0	0
River	Miss	P28	28	1	12	0.9144	0.000928302	0	0	0	0.95	0.01	0.04	0	0	0	0	0	0
River	Miss	P28	28	2	12	1.8288	0.000898113	0	0	0	0.96	0.01	0.02	0.01	0	0	0	0	0
River	Miss	P28	28	3	12	3.6576	0.000886792	0	0	0	0.97	0.01	0.02	0	0	0	0	0	0
River	Miss	P28	28	4	12	5.4864	0.000864151	0	0	0	0.97	0.01	0.02	0	0	0	0	0	0
River	Miss	P28	28	5	12	8.2296	0.000849057	0	0	0	0.98	0.01	0.01	0	0	0	0	0	0
River	Miss	P29	29	1	12	0.85344	0.000977358	0	0	0	0.95	0.01	0.04	0	0	0	0	0	0
River	Miss	P29	29	2	12	1.73736	0.000939623	0	0	0	0.97	0.01	0.02	0	0	0	0	0	0
River	Miss	P29	29	3	12	3.47472	0.000909434	0	0	0	0.98	0.01	0.01	0	0	0	0	0	0
River	Miss	P29	29	4	12	5.1816	0.000916981	0	0	0	0.98	0.01	0.01	0	0	0	0	0	0
River	Miss	P29	29	5	12	7.80288	0.000913208	0	0	0	0.99	0.01	0	0	0	0	0	0	0
River	Miss	P30	30	1	12	0.54864	0.00045283	0	0	0	0.81	0.06	0.12	0.01	0	0	0	0	0
River	Miss	P30	30	2	12	1.95072	0.000433962	0	0	0	0.85	0.06	0.09	0	0	0	0	0	0
River	Miss	P30	30	3	12	4.32816	0.000396226	0	0	0	0.9	0.06	0.04	0	0	0	0	0	0
River	Miss	P30	30	4	12	6.67512	0.000372453	0	0	0	0.94	0.04	0.02	0	0	0	0	0	0
River	Miss	P31	31	1	12	0.54864	0.000513208	0	0	0	0.78	0.06	0.12	0.04	0	0	0	0	0
River	Miss	P31	31	2	12	1.43256	0.00049434	0	0	0	0.82	0.05	0.11	0.02	0	0	0	0	0
River	Miss	P31	31	3	12	3.32232	0.000456604	0	0	0	0.87	0.05	0.07	0.01	0	0	0	0	0
River	Miss	P31	31	4	12	6.06552	0.000433962	0	0	0	0.9	0.04	0.06	0	0	0	0	0	0
River	Miss	P31	31	5	12	8.59536	0.000415094	0	0	0	0.95	0.03	0.02	0	0	0	0	0	0
River	Miss	P31	31	6	12	9	0.000396226	0	0	0	0.96	0.02	0.02	0	0	0	0	0	0
River	Miss	P32	32	1	12	0.54864	0.000403774	0	0	0	0.74	0.07	0.11	0.08	0	0	0	0	0
River	Miss	P32	32	2	12	1.43256	0.000372075	0	0	0	0.79	0.07	0.11	0.03	0	0	0	0	0
River	Miss	P32	32	3	12	3.32232	0.000340377	0	0	0	0.85	0.07	0.08	0	0	0	0	0	0
River	Miss	P32	32	4	12	6.06552	0.000330566	0	0	0	0.88	0.06	0.06	0	0	0	0	0	0
River	Miss	P32	32	5	12	8.59536	0.000297358	0	0	0	0.93	0.04	0.03	0	0	0	0	0	0
River	Miss	P32	32	6	12	10.0279	0.000289057	0	0	0	0.94	0.04	0.02	0	0	0	0	0	0
River	Miss	P33	33	1	12	0.54864	0.000377358	0	0	0	0.59	0.08	0.16	0.17	0	0	0	0	0
River	Miss	P33	33	2	12	1.58496	0.000304906	0	0	0	0.7	0.08	0.18	0.04	0	0	0	0	0
River	Miss	P33	33	3	12	3.62712	0.000268302	0	0	0	0.81	0.08	0.11	0	0	0	0	0	0
River	Miss	P33	33	4	12	6.61416	0.000241509	0	0	0	0.84	0.06	0.1	0	0	0	0	0	0
River	Miss	P33	33	5	12	9.38784	0.000239245	0	0	0	0.87	0.07	0.06	0	0	0	0	0	0
River	Miss	P33	33	6	12	10.9423	0.000218113	0	0	0	0.9	0.06	0.04	0	0	0	0	0	0
River	Miss	P34	34	1	12	0.54864	0.000377358	0	0	0	0.56	0.05	0.38	0.01	0	0	0	0	0
River	Miss	P34	34	2	12	1.58496	0.000304906	0	0	0	0.52	0.07	0.34	0.07	0	0	0	0	0
River	Miss	P34	34	3	12	3.62712	0.000268302	0	0	0	0.69	0.08	0.22	0.01	0	0	0	0	0
River	Miss	P34	34	4	12	6.61416	0.000241509	0	0	0	0.8	0.08	0.12	0	0	0	0	0	0
River	Miss	P34	34	5	12	9.38784	0.000239245	0	0	0	0.89	0.04	0.07	0	0	0	0	0	0
River	Miss	P34	34	6	12	10.9423	0.000218113	0	0	0	0.92	0.04	0.04	0	0	0	0	0	0
River	Miss	P35	35	1	12	0.54864	0.000456604	0	0	0	0.33	0.05	0.61	0.01	0	0	0	0	0
River	Miss	P35	35	2	12	1.40208	0.000360755	0	0	0	0.4	0.07	0.51	0.02	0	0	0	0	0
River	Miss	P35	35	3	12	3.44424	0.00024717	0	0	0	0.6	0.06	0.33	0.01	0	0	0	0	0
River	Miss	P35	35	4	12	6.76656	0.00017434	0	0	0	0.7	0.07	0.23	0	0	0	0	0	0
River	Miss	P35	35	5	12	9.81456	0.000132075	0	0	0	0.87	0.05	0.08	0	0	0	0	0	0
River	Miss	P35	35	6	12	11.5824	0.000117736	0	0	0	0.93	0.03	0.04	0	0	0	0	0	0
River	Miss	P36	36	1	12	0.54864	0.000754717	0	0	0	0.19	0.05	0.27	0.46	0	0	0	0	0
River	Miss	P36	36	2	12	1.73736	0.000297736	0	0	0	0.47	0.1	0.19	0.22	0	0	0	0	0
River	Miss	P36	36	3	12	4.2672	0.000227547	0	0	0	0.63	0.08	0.17	0.12	0	0	0	0	0
River	Miss	P36	36	4	12	7.10184	0.000180377	0	0	0	0.73	0.11	0.12	0.04	0	0	0	0	0
River	Miss	P36	36	5	12	9.23544	0.000153208	0	0	0	0.86	0.06	0.08	0	0	0	0	0	0
River	Miss	P37	37	1	12	0.54864	0.000363774	0	0	0	0.51	0.13	0.19	0.15	0	0	0	0	0
River	Miss	P37	37	2	12	1.95072	0.000276981	0	0	0	0.55	0.12	0.19	0.14	0	0	0	0	0
River	Miss	P37	37	3	12	4.93776	0.000208679	0	0	0	0.7	0.12	0.14	0.04	0	0	0	0	0
River	Miss	P37	37	4	12	8.62584	0.000170566	0	0	0	0.78	0.11	0.1	0.01	0	0	0	0	0
River	Miss	P37	37	5	12	10.729	0.00014717	0	0	0	0.84	0.08	0.07	0.01	0	0	0	0	0
River	Miss	P38	38	1	12	0.54864	0.000318491	0	0	0	0.34	0.08	0.16	0.37	0	0	0	0	0
River	Miss	P38	38	2	12	1.76784	0.000196226	0	0	0	0.5	0.15	0.17	0.17	0	0	0	0	0
River	Miss	P38	38	3	12	4.93776	0.000164528	0	0	0	0.63	0.12	0.15	0.1	0	0	0	0	0
River	Miss	P38	38	4	12	9.144	0.00012566	0	0	0	0.75	0.12	0.11	0.02	0	0	0	0	0
River	Miss	P38	38	5	12	11.5519	0.000119623	0	0	0	0.8	0.09	0.1	0.01	0	0	0	0	0
River	Miss	P39	39	1	12	0.54864	0.000244528	0	0	0	0.34	0.06	0.1	0.5	0	0	0	0	0
River	Miss	P39	39	2	12	1.8288	0.000195472	0	0	0	0.41	0.07	0.13	0.39	0	0	0	0	0
River	Miss	P39	39	3	12	5.15112	0.000109811	0	0	0	0.73	0.07	0.13	0.07	0	0	0	0	0
River	Miss	P39	39	4	12	9.47928	9.09434e-05	0	0	0	0.84	0.03	0.1	0.03	0	0	0	0	0
River	Miss	P39	39	5	12	11.9786	8.49057e-05	0	0	0	0.87	0.05	0.06	0.02	0	0	0	0	0
River	Miss	P40	40	1	12	0.54864	0.000384906	0	0	0	0.19	0.01	0.12	0.68	0	0	0	0	0
River	Miss	P40	40	2	12	1.95072	0.00017283	0	0	0	0.41	0.03	0.14	0.4	0	0	0	0	0
River	Miss	P40	40	3	12	6.03504	0.000120755	0	0	0	0.57	0.05	0.12	0.26	0	0	0	0	0
River	Miss	P40	40	4	12	11.6129	8.9434e-05	0	0	0	0.77	0.05	0.08	0.1	0	0	0	0	0
River	Miss	P40	40	5	12	14.6609	8.07547e-05	0	0	0	0.86	0.04	0.06	0.04	0	0	0	0	0
River	Miss	P41	41	1	12	0.54864	0.000157736	0	0	0	0.43	0.03	0.29	0.25	0	0	0	0	0
River	Miss	P41	41	2	12	2.10312	0.000106792	0	0	0	0.69	0.04	0.14	0.13	0	0	0	0	0
River	Miss	P41	41	3	12	5.88264	8.37736e-05	0	0	0	0.83	0.02	0.09	0.06	0	0	0	0	0
River	Miss	P41	41	4	12	10.8509	7.81132e-05	0	0	0	0.84	0.03	0.07	0.06	0	0	0	0	0
River	Miss	P41	41	5	12	13.716	7.50943e-05	0	0	0	0.91	0.04	0.03	0.02	0	0	0	0	0
River	Miss	P42	42	1	12	0.54864	0.000141132	0	0	0	0.53	0.02	0.4	0.05	0	0	0	0	0
River	Miss	P42	42	2	12	1.92024	8.86792e-05	0	0	0	0.78	0.02	0.14	0.06	0	0	0	0	0
River	Miss	P42	42	3	12	5.36448	7.84906e-05	0	0	0	0.9	0.02	0.06	0.02	0	0	0	0	0
River	Miss	P42	42	4	12	9.906	7.4717e-05	0	0	0	0.92	0.02	0.05	0.01	0	0	0	0	0
River	Miss	P42	42	5	12	12.4968	7.0566e-05	0	0	0	0.94	0.02	0.03	0.01	0	0	0	0	0
River	Miss	P43	43	1	12	0.4572	0.000193585	0	0	0	0.86	0.04	0.09	0.01	0	0	0	0	0
River	Miss	P43	43	2	12	1.43256	0.000169811	0	0	0	0.95	0.03	0.02	0	0	0	0	0	0
River	Miss	P43	43	3	12	3.048	0.000162264	0	0	0	0.97	0.01	0.02	0	0	0	0	0	0
River	Miss	P43	43	4	12	4.75488	0.000157736	0	0	0	0.98	0.01	0.01	0	0	0	0	0	0
River	Miss	P43	43	5	12	5.57784	0.000152075	0	0	0	0.98	0.02	0	0	0	0	0	0	0
River	Miss	P44	44	1	12	0.4572	0.000187547	0	0	0	0.53	0.12	0.31	0.04	0	0	0	0	0
River	Miss	P44	44	2	12	1.58496	0.000121887	0	0	0	0.8	0.07	0.13	0	0	0	0	0	0
River	Miss	P44	44	3	12	3.74904	0.000106792	0	0	0	0.88	0.06	0.06	0	0	0	0	0	0
River	Miss	P44	44	4	12	6.4008	9.96226e-05	0	0	0	0.93	0.03	0.04	0	0	0	0	0	0
River	Miss	P44	44	5	12	7.55904	9.50943e-05	0	0	0	0.96	0.03	0.01	0	0	0	0	0	0
River	Miss	P45	45	1	12	0.4572	8.98113e-05	0	0	0	0.48	0.09	0.34	0.07	0	0	0	0	0
River	Miss	P45	45	2	12	1.64592	6.26415e-05	0	0	0	0.64	0.11	0.23	0.02	0	0	0	0	0
River	Miss	P45	45	3	12	3.9624	5.4717e-05	0	0	0	0.75	0.09	0.16	0	0	0	0	0	0
River	Miss	P45	45	4	12	6.858	4.60377e-05	0	0	0	0.85	0.06	0.09	0	0	0	0	0	0
River	Miss	P45	45	5	12	8.0772	4.67925e-05	0	0	0	0.86	0.05	0.09	0	0	0	0	0	0
River	Miss	P46	46	1	12	0.54864	0.000223774	0	0	0	0.68	0.05	0.25	0.02	0	0	0	0	0
River	Miss	P46	46	2	12	1.34112	0.000189057	0	0	0	0.79	0.04	0.16	0.01	0	0	0	0	0
River	Miss	P46	46	3	12	2.49936	0.000181132	0	0	0	0.86	0.04	0.1	0	0	0	0	0	0
River	Miss	P46	46	4	12	3.71856	0.00015283	0	0	0	0.98	-0.02	0.04	0	0	0	0	0	0
River	Miss	P47	47	1	12	0.54864	0.000520755	0	0	0	0.52	0.05	0.39	0.04	0	0	0	0	0
River	Miss	P47	47	2	12	3.5052	0.000135094	0	0	0	0.83	0.03	0.14	0	0	0	0	0	0
River	Miss	P47	47	3	12	4.2672	0.000123396	0	0	0	0.89	0.04	0.07	0	0	0	0	0	0
River	Miss	P48	48	1	12	0.54864	0.000513208	0	0	0	0.16	0.03	0.68	0.12	0	0	0	0	0
River	Miss	P48	48	2	12	1.55448	0.000166415	0	0	0	0.47	0.08	0.45	0	0	0	0	0	0
River	Miss	P48	48	3	12	3.41376	0.000107547	0	0	0	0.71	0.08	0.21	0	0	0	0	0	0
River	Miss	P48	48	4	12	5.334	9.66038e-05	0	0	0	0.78	0.06	0.16	0	0	0	0	0	0
River	Miss	P48	48	5	12	6.52272	7.69811e-05	0	0	0	0.88	0.04	0.08	0	0	0	0	0	0
River	Miss	P49	49	1	12	0.54864	0.000186415	0	0	0	0.43	0.06	0.51	0	0	0	0	0	0
River	Miss	P49	49	2	12	6.4008	8.07547e-05	0	0	0	0.75	0.05	0.2	0	0	0	0	0	0
River	Miss	P49	49	3	12	7.0104	6.75472e-05	0	0	0	0.85	0.04	0.11	0	0	0	0	0	0
River	Miss	P50	50	1	12	0.54864	0.000204528	0	0	0	0.19	0.03	0.78	0	0	0	0	0	0
River	Miss	P50	50	2	12	8.59536	3.73585e-05	0	0	0	0.82	0.03	0.15	0	0	0	0	0	0
River	Miss	P50	50	3	12	10.2108	3.4717e-05	0	0	0	0.89	0.02	0.09	0	0	0	0	0	0
River	Miss	P51	51	1	12	0.54864	0.000110566	0	0	0	0.28	0.05	0.65	0.02	0	0	0	0	0
River	Miss	P51	51	2	12	1.64592	7.66038e-05	0	0	0	0.4	0.03	0.57	0	0	0	0	0	0
River	Miss	P51	51	3	12	3.81	5.4717e-05	0	0	0	0.56	0.04	0.4	0	0	0	0	0	0
River	Miss	P51	51	4	12	6.18744	3.84906e-05	0	0	0	0.79	0.04	0.17	0	0	0	0	0	0
River	Miss	P51	51	5	12	7.62	3.32075e-05	0	0	0	0.91	0.04	0.05	0	0	0	0	0	0
River	Grand	P1	52	1	12	0.0840828	0.00108302	0	0	0	0.452962	0.252962	0.221951	0.0721254	0	0	0	0	0
River	Grand	P1	52	2	12	0.246148	0.000890566	0	0	0	0.555085	0.241102	0.167797	0.0360169	0	0	0	0	0
River	Grand	P1	52	3	12	0.376951	0.000788679	0	0	0	0.593301	0.239234	0.135885	0.0301435	0	0	0	0	0
River	Grand	P1	52	4	12	0.520192	0.000728302	0	0	0	0.642487	0.206218	0.123834	0.0300518	0	0	0	0	0
River	Grand	P1	52	5	12	0.69052	0.000622642	0	0	0	0.69697	0.187273	0.101818	0.0139394	0	0	0	0	0
River	Grand	P2	53	1	12	0.0971599	0.000675472	0	0	0	0.469274	0.273184	0.22514	0.0329609	0	0	0	0	0
River	Grand	P2	53	2	12	0.236961	0.000611321	0	0	0	0.660494	0.235185	0.0962963	0.00987654	0	0	0	0	0
River	Grand	P2	53	3	12	0.387643	0.000596226	0	0	0	0.574051	0.244304	0.16519	0.0170886	0	0	0	0	0
River	Grand	P2	53	4	12	0.517742	0.000501887	0	0	0	0.647368	0.215789	0.127068	0.00977444	0	0	0	0	0
River	Grand	P2	53	5	12	0.657308	0.000501887	0	0	0	0.629323	0.218797	0.127068	0.024812	0	0	0	0	0
River	Grand	P3	54	1	12	0.0446371	0.000890566	0	0	0	0.339831	0.277966	0.347881	0.0338983	0	0	0	0	0
River	Grand	P3	54	2	12	0.1381	0.000683019	0	0	0	0.439779	0.316022	0.218785	0.0248619	0	0	0	0	0
River	Grand	P3	54	3	12	0.257556	0.000581132	0	0	0	0.522078	0.292857	0.175325	0.00974026	0	0	0	0	0
River	Grand	P3	54	4	12	0.360218	0.000467925	0	0	0	0.567742	0.296774	0.128226	0.00725806	0	0	0	0	0
River	Grand	P3	54	5	12	0.47258	0.000433962	0	0	0	0.625217	0.245217	0.125217	0.00521739	0	0	0	0	0
River	Grand	P4	55	1	12	0.0966839	0.000626415	0	0	0	0.539157	0.213855	0.201205	0.0457831	0	0	0	0	0
River	Grand	P4	55	2	12	0.233548	0.000516981	0	0	0	0.605839	0.229197	0.151825	0.0131387	0	0	0	0	0
River	Grand	P4	55	3	12	0.363297	0.000433962	0	0	0	0.673913	0.215652	0.101739	0.00782609	0	0	0	0	0
River	Grand	P4	55	4	12	0.48277	0.000422642	0	0	0	0.655357	0.221429	0.110714	0.0133929	0	0	0	0	0
River	Grand	P4	55	5	12	0.62011	0.000388679	0	0	0	0.731068	0.185437	0.0786408	0.00485437	0	0	0	0	0
River	Grand	P5	56	1	12	0.113382	0.0006	0	0	0	0.486792	0.210063	0.272956	0.0301887	0	0	0	0	0
River	Grand	P5	56	2	12	0.248467	0.000520755	0	0	0	0.599275	0.16087	0.21087	0.0289855	0	0	0	0	0
River	Grand	P5	56	3	12	0.38216	0.000509434	0	0	0	0.608148	0.176296	0.191111	0.0251852	0	0	0	0	0
River	Grand	P5	56	4	12	0.515655	0.000426415	0	0	0	0.675221	0.167257	0.146018	0.0123894	0	0	0	0	0
River	Grand	P5	56	5	12	0.638014	0.000360755	0	0	0	0.706067	0.16318	0.125523	0.00627615	0	0	0	0	0
River	Grand	P6	57	1	12	0.0260733	0.00208302	0	0	0	0.559783	0.178986	0.226449	0.034058	0	0	0	0	0
River	Grand	P6	57	2	12	0.108748	0.00147925	0	0	0	0.744898	0.13699	0.109949	0.00688776	0	0	0	0	0
River	Grand	P6	57	3	12	0.216408	0.00129811	0	0	0	0.834302	0.104942	0.0581395	0.00290698	0	0	0	0	0
River	Grand	P6	57	4	12	0.346253	0.00116981	0	0	0	0.877419	0.0870968	0.033871	0	0	0	0	0	0
River	Grand	P7	58	1	12	0.0214544	0.00164528	0	0	0	0.662844	0.130046	0.197018	0.0100917	0	0	0	0	0
River	Grand	P7	58	2	12	0.111045	0.00124906	0	0	0	0.791541	0.103927	0.092145	0.0129909	0	0	0	0	0
River	Grand	P7	58	3	12	0.22098	0.00123774	0	0	0	0.814024	0.0960366	0.0829268	0.0070122	0	0	0	0	0
River	Grand	P7	58	4	12	0.353568	0.0012	0	0	0	0.855346	0.0839623	0.0600629	0.00314465	0	0	0	0	0
River	Grand	P8	59	1	12	0.0245444	0.00186038	0	0	0	0.517241	0.155984	0.227181	0.0669371	0	0	0	0	0
River	Grand	P8	59	2	12	0.1224	0.00135094	0	0	0	0.784916	0.0960894	0.0879888	0.0298883	0	0	0	0	0
River	Grand	P8	59	3	12	0.235527	0.00119623	0	0	0	0.861199	0.0760252	0.0561514	0.00914826	0	0	0	0	0
River	Grand	P8	59	4	12	0.3429	0.00115849	0	0	0	0.892508	0.0749186	0.0299674	0.000977199	0	0	0	0	0
River	Grand	P9	60	1	12	0.027432	0.00219245	0	0	0	0.533563	0.128916	0.223752	0.103959	0	0	0	0	0
River	Grand	P9	60	2	12	0.146838	0.00136226	0	0	0	0.786704	0.098892	0.0969529	0.0168975	0	0	0	0	0
River	Grand	P9	60	3	12	0.278112	0.00126038	0	0	0	0.829341	0.091018	0.0718563	0.00688623	0	0	0	0	0
River	Grand	P9	60	4	12	0.46069	0.00118868	0	0	0	0.873016	0.0780952	0.0428571	0.00412698	0	0	0	0	0
River	Grand	P10	61	1	12	0.0129931	0.00195472	0	0	0	0.550193	0.137066	0.222008	0.0880309	0	0	0	0	0
River	Grand	P10	61	2	12	0.1016	0.00146415	0	0	0	0.742268	0.114691	0.111082	0.0298969	0	0	0	0	0
River	Grand	P10	61	3	12	0.202692	0.00143774	0	0	0	0.755906	0.195801	0.1	0.0199475	0	0	0	0	0
River	Grand	P10	61	4	12	0.3048	0.00130943	0	0	0	0.795389	0.116138	0.0760807	0.0129683	0	0	0	0	0
River	Grand	P11	62	1	12	0.0233363	0.00188302	0	0	0	0.498998	0.172946	0.240481	0.087976	0	0	0	0	0
River	Grand	P11	62	2	12	0.148609	0.00121132	0	0	0	0.744548	0.150156	0.094081	0.00996885	0	0	0	0	0
River	Grand	P11	62	3	12	0.298704	0.00116226	0	0	0	0.772727	0.142857	0.0779221	0.00584416	0	0	0	0	0
River	Grand	P11	62	4	12	0.449179	0.00108679	0	0	0	0.798611	0.130903	0.0690972	0.00208333	0	0	0	0	0
River	Grand	P12	63	1	12	0.0256854	0.00119245	0	0	0	0.756329	0.120886	0.110127	0.0139241	0	0	0	0	0
River	Grand	P12	63	2	12	0.114586	0.00114717	0	0	0	0.779605	0.146053	0.0690789	0.00690789	0	0	0	0	0
River	Grand	P12	63	3	12	0.2286	0.00103396	0	0	0	0.828467	0.117883	0.0518248	0.00291971	0	0	0	0	0
River	Grand	P12	63	4	12	0.343759	0.00102642	0	0	0	0.867647	0.0981618	0.0349265	0.00183824	0	0	0	0	0
River	Grand	P13	64	1	12	0.029718	0.0019283	0	0	0	0.567515	0.139922	0.219178	0.0639922	0	0	0	0	0
River	Grand	P13	64	2	12	0.144262	0.00133208	0	0	0	0.818697	0.109915	0.0671388	0.00311615	0	0	0	0	0
River	Grand	P13	64	3	12	0.29718	0.00123019	0	0	0	0.846626	0.0791411	0.0521472	0.000920245	0	0	0	0	0
River	Grand	P13	64	4	12	0.450273	0.00117358	0	0	0	0.88746	0.0810289	0.0308682	0.00096463	0	0	0	0	0
River	Grand	P14	65	1	12	0.017272	0.00415094	0	0	0	0.59	0.147273	0.249091	0.014	0	0	0	0	0
River	Grand	P14	65	2	12	0.0870045	0.00279623	0	0	0	0.727395	0.151147	0.121053	0	0	0	0	0	0
River	Grand	P14	65	3	12	0.236723	0.00236981	0	0	0	0.834395	0.10207	0.0649682	0	0	0	0	0	0
River	Grand	P14	65	4	12	0.382249	0.002	0	0	0	0.913208	0.0590566	0.0279245	0	0	0	0	0	0
River	Grand	P15	66	1	12	0.0287547	0.00327547	0	0	0	0.678571	0.150922	0.167051	0.00195853	0	0	0	0	0
River	Grand	P15	66	2	12	0.0758209	0.0027434	0	0	0	0.778542	0.144429	0.0770289	0	0	0	0	0	0
River	Grand	P15	66	3	12	0.1524	0.00221887	0	0	0	0.884354	0.0870748	0.029932	0	0	0	0	0	0
River	Grand	P15	66	4	12	0.2032	0.00219245	0	0	0	0.891566	0.0839931	0.0230637	0	0	0	0	0	0
River	Grand	P16	67	1	12	0.0173421	0.00315094	0	0	0	0.765269	0.154491	0.0749701	0.00502994	0	0	0	0	0
River	Grand	P16	67	2	12	0.0519814	0.00273962	0	0	0	0.863636	0.103994	0.0319559	0	0	0	0	0	0
River	Grand	P16	67	3	12	0.0935665	0.00239245	0	0	0	0.905363	0.0629338	0.0320189	0	0	0	0	0	0
River	Grand	P16	67	4	12	0.142672	0.00221509	0	0	0	0.919932	0.0689949	0.0110733	0	0	0	0	0	0
River	Grand	P17	68	1	12	0.0144379	0.00426415	0	0	0	0.589381	0.163717	0.217699	0.0279646	0	0	0	0	0
River	Grand	P17	68	2	12	0.109182	0.00262642	0	0	0	0.821839	0.0949713	0.0810345	0.00201149	0	0	0	0	0
River	Grand	P17	68	3	12	0.219456	0.00228679	0	0	0	0.910891	0.0620462	0.0260726	0.000990099	0	0	0	0	0
River	Grand	P17	68	4	12	0.309093	0.00227547	0	0	0	0.925373	0.054063	0.0180763	0.00199005	0	0	0	0	0
River	Grand	P18	69	1	12	0.04064	0.00686792	0	0	0	0.785714	0.121978	0.0912088	0.00197802	0	0	0	0	0
River	Grand	P18	69	2	12	0.0870857	0.00581132	0	0	0	0.902597	0.0681818	0.027987	0	0	0	0	0	0
River	Grand	P18	69	3	12	0.176784	0.0054717	0	0	0	0.937931	0.052	0.0110345	0	0	0	0	0	0
River	Grand	P18	69	4	12	0.267855	0.00535849	0	0	0	0.957746	0.0369718	0.00302817	0	0	0	0	0	0
River	Grand	P19	70	1	12	0.06096	0.00758491	0	0	0	0.756219	0.128856	0.110945	0.00497512	0	0	0	0	0
River	Grand	P19	70	2	12	0.0925975	0.00645283	0	0	0	0.877193	0.0918129	0.0329825	0	0	0	0	0	0
River	Grand	P19	70	3	12	0.18288	0.00607547	0	0	0	0.919255	0.0658385	0.0150311	0	0	0	0	0	0
River	Grand	P19	70	4	12	0.275008	0.00569811	0	0	0	0.960265	0.0360265	0.00602649	0	0	0	0	0	0
River	Grand	P20	71	1	12	0.0429126	0.00566038	0	0	0	0.9	0.0666667	0.031	0	0	0	0	0	0
River	Grand	P20	71	2	12	0.072154	0.00577358	0	0	0	0.901961	0.0679739	0.0290196	0	0	0	0	0	0
River	Grand	P20	71	3	12	0.163068	0.00532075	0	0	0	0.943262	0.0460284	0.0119858	0	0	0	0	0	0
River	Grand	P20	71	4	12	0.245215	0.00513208	0	0	0	0.948529	0.045	0.00801471	0	0	0	0	0	0
River	Grand	P21	72	1	12	0.0413982	0.00630189	0	0	0	0.778443	0.097006	0.120958	0.00401198	0	0	0	0	0
River	Grand	P21	72	2	12	0.0714866	0.00569811	0	0	0	0.880795	0.0741722	0.0450331	0	0	0	0	0	0
River	Grand	P21	72	3	12	0.138684	0.00524528	0	0	0	0.928058	0.0559712	0.0179856	0	0	0	0	0	0
River	Grand	P21	72	4	12	0.210127	0.00498113	0	0	0	0.954545	0.0359848	0.0080303	0	0	0	0	0	0
River	Grand	P22	73	1	12	0.0515471	0.0554717	0	0	0	0.741497	0.0931973	0.123129	0.0340136	0	0	0	0	0
River	Grand	P22	73	2	12	0.17526	0.0498113	0	0	0	0.833333	0.0818182	0.0848485	0.003	0	0	0	0	0
River	Grand	P22	73	3	12	0.35052	0.0471698	0	0	0	0.856	0.084	0.05504	0.002	0	0	0	0	0
River	Grand	P22	73	4	12	0.527098	0.0445283	0	0	0	0.889831	0.0710169	0.0339831	0.001	0	0	0	0	0
River	Grand	P23	74	1	12	0.0614766	0.06	0	0	0	0.628931	0.0981132	0.242138	0.03	0	0	0	0	0
River	Grand	P23	74	2	12	0.17956	0.0498113	0	0	0	0.757576	0.134091	0.10303	0.004	0	0	0	0	0
River	Grand	P23	74	3	12	0.362712	0.0460377	0	0	0	0.810656	0.12377	0.0640164	0.001	0	0	0	0	0
River	Grand	P23	74	4	12	0.545432	0.0415094	0	0	0	0.900909	0.074	0.025	0	0	0	0	0	0
River	Ganges	P1	75	4	31	9.7	5.28302e-05	0.3392	0.0705	0.0622	0.0548	0.071	0.0777	0.0618	0.0599	0.0529	0.0384	0.0324	0.0309	0.0255	0.0123	0.006	0.0034	0.0013	0	0	0	0	0	0	0	0	0	0	0	0	0	0
River	Ganges	P1	75	3	31	5	7.92453e-05	0.3293	0.067	0.0581	0.0503	0.0638	0.0678	0.0521	0.0489	0.0422	0.0308	0.0271	0.0288	0.03	0.0206	0.0149	0.0147	0.0134	0.0115	0.0079	0.0071	0.0058	0.0042	0.0025	0.0011	0	0	0	0	0	0	0
River	Ganges	P1	75	2	31	1	9.0566e-05	0.3079	0.0635	0.0556	0.0487	0.0626	0.0677	0.0532	0.0511	0.0453	0.0339	0.0304	0.0329	0.0349	0.0241	0.0174	0.0168	0.015	0.0124	0.0083	0.0071	0.0054	0.0034	0.0018	0.0007	0	0	0	0	0	0	0
River	Ganges	P1	75	1	31	0.2	0.000101887	0.2864	0.0595	0.0524	0.0462	0.0598	0.0654	0.0522	0.051	0.0462	0.0352	0.0321	0.0352	0.0381	0.0272	0.0203	0.0201	0.018	0.0149	0.0099	0.0086	0.0068	0.0047	0.0033	0.0022	0.0018	0.0016	0.001	0	0	0	0
River	Ganges	P2	76	1	31	0.1	0.00124528	0.073	0.016	0.0149	0.0138	0.0188	0.0221	0.0191	0.0205	0.0206	0.0175	0.0175	0.0214	0.0271	0.0233	0.0209	0.0256	0.0311	0.0394	0.0441	0.0668	0.0902	0.1028	0.0965	0.0736	0.0489	0.0239	0.0106	0	0	0	0
River	Ganges	P2	76	2	31	0.6	0.000671698	0.132	0.0287	0.0263	0.024	0.0325	0.0377	0.0324	0.0346	0.0347	0.0295	0.0298	0.0368	0.0466	0.0389	0.033	0.0372	0.0391	0.04	0.0361	0.0458	0.0553	0.0577	0.0478	0.0289	0.012	0.0026	0	0	0	0	0
River	Ganges	P2	76	3	31	1.1	0.000569811	0.1353	0.0292	0.0265	0.024	0.0322	0.0368	0.0309	0.0321	0.0311	0.0254	0.0249	0.0299	0.0371	0.0311	0.0269	0.0312	0.0343	0.0374	0.0356	0.0472	0.0581	0.0624	0.0558	0.0406	0.0261	0.0122	0.0042	0.0014	0	0	0
River	Ganges	P2	76	4	31	5	0.0006	0.1619	0.0344	0.0309	0.0278	0.0369	0.0419	0.0351	0.0365	0.036	0.0302	0.0304	0.0376	0.0475	0.0393	0.033	0.0366	0.0375	0.0369	0.0312	0.0362	0.0396	0.0396	0.0344	0.0247	0.0157	0.008	0	0	0	0	0
River	Ganges	P2	76	5	31	8	0.0006	0.1941	0.0407	0.0365	0.0327	0.0432	0.0486	0.0405	0.0419	0.0411	0.0344	0.0347	0.0428	0.0544	0.0454	0.0382	0.0424	0.0433	0.0418	0.033	0.0326	0.0246	0.0132	0	0	0	0	0	0	0	0	0
River	Ganges	P2	76	6	31	10	0.000524528	0.1759	0.0378	0.0345	0.0314	0.0422	0.0484	0.041	0.043	0.0424	0.0353	0.035	0.0423	0.0521	0.0426	0.0351	0.0378	0.0367	0.0335	0.0258	0.0274	0.0277	0.0252	0.0206	0.0153	0.011	0	0	0	0	0	0
River	Ganges	P2	76	7	31	11.9	0.00034717	0.2414	0.051	0.046	0.0414	0.0548	0.0619	0.0513	0.0525	0.0504	0.0407	0.0392	0.0452	0.052	0.0389	0.0295	0.0291	0.0253	0.02	0.0125	0.0095	0.0052	0.0022	0	0	0	0	0	0	0	0	0
River	Ganges	P3	77	1	31	0.1	0.000490566	0.131	0.0287	0.0263	0.0242	0.0328	0.0383	0.033	0.0353	0.0355	0.0301	0.0304	0.0377	0.0482	0.0412	0.036	0.042	0.046	0.049	0.0435	0.05	0.0491	0.0399	0.0279	0.0181	0.0125	0.0073	0.0038	0.0023	0	0	0
River	Ganges	P3	77	2	31	0.6	0.000433962	0.1614	0.0354	0.0325	0.0299	0.0406	0.0474	0.0409	0.0436	0.0437	0.0368	0.0368	0.0447	0.0553	0.0454	0.0381	0.0421	0.0425	0.0403	0.0315	0.0318	0.0273	0.0194	0.0116	0.0062	0.0038	0.0031	0.0036	0.0035	0.0009	0	0
River	Ganges	P3	77	3	31	1.1	0.000433962	0.1591	0.0348	0.0318	0.0292	0.0396	0.0462	0.04	0.0428	0.0433	0.0369	0.0372	0.0455	0.0561	0.0453	0.0372	0.0407	0.0414	0.0403	0.0325	0.0336	0.0294	0.0217	0.0145	0.0093	0.0062	0.0032	0.0013	0.0007	0	0	0
River	Ganges	P3	77	4	31	2	0.000449057	0.1444	0.0315	0.029	0.0267	0.0363	0.0423	0.0363	0.0386	0.0384	0.0322	0.0321	0.039	0.0488	0.0414	0.0363	0.0425	0.0459	0.0459	0.0369	0.0382	0.0352	0.0304	0.025	0.0195	0.0146	0.0084	0.0041	0	0	0	0
River	Ganges	P3	77	5	31	5	0.000407547	0.1485	0.033	0.0306	0.0283	0.0388	0.0458	0.0398	0.0427	0.0429	0.036	0.0358	0.0434	0.0536	0.0442	0.0375	0.0423	0.0442	0.0436	0.0353	0.0374	0.0345	0.0277	0.0189	0.0104	0.0047	0	0	0	0	0	0
River	Ganges	P3	77	6	31	13.9	0.000233962	0.2355	0.0497	0.0447	0.0402	0.0532	0.0603	0.0505	0.0525	0.0514	0.0426	0.0417	0.0487	0.0559	0.041	0.0305	0.0294	0.0248	0.0186	0.011	0.0083	0.0054	0.0027	0.0012	0	0	0	0	0	0	0	0
River	Ganges	P4	78	1	31	3	0.000226415	0.1969	0.0431	0.0394	0.0361	0.0488	0.0563	0.0475	0.0492	0.0472	0.0377	0.0357	0.0409	0.0475	0.0371	0.0301	0.0321	0.0308	0.0274	0.0205	0.021	0.0206	0.019	0.0153	0.0103	0.0063	0.003	0	0	0	0	0
River	Ganges	P4	78	2	31	8	0.000230189	0.2072	0.0452	0.0413	0.0378	0.0509	0.0586	0.0494	0.051	0.0488	0.0389	0.037	0.0427	0.0502	0.0397	0.0322	0.0344	0.0328	0.0286	0.0202	0.0183	0.0146	0.0104	0.0064	0.0029	0.0006	0	0	0	0	0	0
River	Ganges	P4	78	3	31	12.9	0.000139623	0.2257	0.0503	0.0468	0.0434	0.0594	0.0698	0.0602	0.0634	0.0616	0.0492	0.0458	0.05	0.0518	0.0339	0.0228	0.0201	0.016	0.0119	0.0072	0.0055	0.0036	0.0018	0	0	0	0	0	0	0	0	0
River	Ganges	P5	79	1	31	0.1	0.0024717	0.0377	0.0081	0.0076	0.0072	0.01	0.0119	0.0106	0.0118	0.0124	0.011	0.0115	0.0148	0.0197	0.0177	0.0166	0.0221	0.0314	0.0493	0.0657	0.1094	0.1479	0.1518	0.1126	0.0608	0.0283	0.0123	0	0	0	0	0
River	Ganges	P5	79	2	31	0.5	0.00116226	0.0618	0.0139	0.0133	0.0126	0.0178	0.0216	0.0194	0.0216	0.0226	0.0198	0.0204	0.0256	0.033	0.0286	0.0259	0.0328	0.0427	0.0586	0.0669	0.0955	0.1113	0.1018	0.0719	0.0386	0.0167	0.0056	0	0	0	0	0
River	Ganges	P5	79	3	31	0.6	0.00115849	0.0815	0.018	0.0167	0.0155	0.0212	0.025	0.0217	0.0232	0.0233	0.0198	0.0201	0.0252	0.0331	0.0293	0.0264	0.0323	0.0398	0.0521	0.0591	0.0859	0.1039	0.0982	0.0703	0.0385	0.02	0	0	0	0	0	0
River	Ganges	P5	79	4	31	1.1	0.00089434	0.1059	0.0233	0.0216	0.02	0.0273	0.032	0.0277	0.0296	0.0296	0.0249	0.0248	0.0302	0.0379	0.0323	0.0283	0.0337	0.0391	0.0468	0.0488	0.0676	0.0808	0.0782	0.0591	0.0334	0.0136	0.0032	0	0	0	0	0
River	Ganges	P5	79	5	31	2.5	0.000845283	0.1052	0.0233	0.0216	0.02	0.0274	0.0322	0.0279	0.0298	0.0298	0.0252	0.0252	0.0309	0.039	0.0332	0.029	0.0347	0.0409	0.0494	0.0508	0.0679	0.0773	0.0715	0.0531	0.0318	0.0163	0.0066	0	0	0	0	0
River	Ganges	P5	79	6	31	7.5	0.000543396	0.1397	0.0315	0.0296	0.0277	0.0383	0.0455	0.0397	0.0426	0.0425	0.0354	0.0348	0.0414	0.0504	0.0412	0.0345	0.0381	0.0391	0.0395	0.0347	0.041	0.0428	0.0369	0.0262	0.0153	0.008	0.0036	0	0	0	0	0
River	Ganges	P5	79	7	31	10.4	0.000267925	0.1911	0.0435	0.0411	0.0387	0.0539	0.0646	0.0566	0.0607	0.0601	0.0491	0.0468	0.0526	0.0577	0.0414	0.0305	0.029	0.0244	0.0186	0.0116	0.0099	0.0083	0.0056	0.003	0.0012	0	0	0	0	0	0	0
River	Ganges	P6	80	1	31	1	0.000920755	0.129662	0.031067	0.0286202	0.0268758	0.0336176	0.0401296	0.0339541	0.0363843	0.0366696	0.0311963	0.0307785	0.0371749	0.0487512	0.0442866	0.0411137	0.0522843	0.0599308	0.0623696	0.0518895	0.0504009	0.0394737	0.0239999	0.0138056	0.00738249	0.00417135	0	0	0	0	0	0
River	Ganges	P6	80	2	31	4	0.000683019	0.1844	0.0399	0.0363	0.033	0.0442	0.0506	0.0425	0.0438	0.0419	0.0334	0.0318	0.0368	0.0438	0.0362	0.0318	0.038	0.0426	0.0445	0.0358	0.0348	0.0281	0.0195	0.0124	0.0075	0.0045	0.0018	0.0006	0	0	0	0
River	Ganges	P6	80	3	31	6	0.000645283	0.209489	0.0461437	0.0418346	0.0385371	0.0471176	0.0550235	0.04546	0.0475162	0.0464859	0.0384946	0.0367654	0.0420518	0.0509725	0.0401452	0.0329246	0.0368664	0.0366927	0.0332389	0.0245775	0.0213776	0.0144552	0.00767141	0.00377237	0.00162467	0.000626061	0	0	0	0	0	0
River	Ganges	P6	80	4	31	8.5	0.000535849	0.2218	0.0481	0.0438	0.0399	0.0535	0.0612	0.0513	0.0525	0.0498	0.0392	0.0365	0.0411	0.0468	0.0361	0.0293	0.0317	0.0314	0.0285	0.0195	0.0156	0.0101	0.0058	0.0032	0.002	0.0012	0	0	0	0	0	0
River	Ganges	P6	80	5	31	10.9	0.000354717	0.291415	0.0626164	0.0561975	0.0514771	0.0626471	0.0730635	0.0599326	0.06148	0.057735	0.0449807	0.038761	0.0378968	0.0368758	0.0211842	0.0131278	0.0113656	0.0082267	0.00530036	0.0028385	0.00172036	0.00074129	0.00019597	2.09309e-05	0	0	0	0	0	0	0	0
River	Ganges	P7	81	1	31	1	0.00109434	0.0630787	0.0240056	0.0212286	0.0199588	0.0247941	0.0296694	0.0252877	0.0273621	0.028271	0.0249782	0.0258662	0.0322756	0.0433729	0.038926	0.0356169	0.0438306	0.0494615	0.0530602	0.0481867	0.0580229	0.0630096	0.0615143	0.0527044	0.03942	0.0290273	0	0	0	0	0	0
River	Ganges	P7	81	2	31	3.5	0.000566038	0.147296	0.0371703	0.0344447	0.0321457	0.0404118	0.0482516	0.0412071	0.0444389	0.0450342	0.0384605	0.0376864	0.0442179	0.0541077	0.0430649	0.0353184	0.0398056	0.0406382	0.039323	0.0322526	0.0333814	0.0293736	0.0219789	0.015329	0.0100437	0.00691676	0	0	0	0	0	0
River	Ganges	P7	81	3	31	6	0.000490566	0.171581	0.0424513	0.0392614	0.0367418	0.0458824	0.054408	0.0458961	0.0488717	0.0488025	0.0411593	0.039989	0.0460748	0.0560808	0.0441001	0.0360347	0.040022	0.0395601	0.0358444	0.0267587	0.0240522	0.017235	0.00979408	0.00519451	0.002524	0.00122019	0	0	0	0	0	0
River	Ganges	P7	81	4	31	8	0.000377358	0.195881	0.0472139	0.0433182	0.0406671	0.051	0.060892	0.0513751	0.0546992	0.0544017	0.0453467	0.043136	0.0479608	0.0552596	0.0401988	0.0304039	0.0315993	0.0288792	0.0242945	0.0171732	0.0146747	0.0101927	0.005694	0.00300126	0.00147601	0.000736018	0	0	0	0	0	0
River	Ganges	P7	81	5	31	9.9	0.000301887	0.226834	0.0548147	0.0503132	0.0469005	0.0580588	0.0685846	0.0571238	0.0600143	0.058492	0.0475508	0.0436732	0.0459864	0.0490613	0.0318922	0.0217934	0.0208612	0.0174274	0.013578	0.00913822	0.00759438	0.00518903	0.00289388	0.00150586	0.00070574	0.000322784	0	0	0	0	0	0
River	Niobr	P1	82	1	7	0.09144	0.000333462	0.24	0.37	0.35	0.04	0	0	0
River	Niobr	P1	82	2	7	0.1524	0.000249615	0.32	0.4	0.26	0.02	0	0	0
River	Niobr	P1	82	3	7	0.24384	0.000151538	0.44	0.41	0.13	0.02	0	0	0
River	Niobr	P2	83	1	7	0.09144	0.000293077	0.29	0.39	0.29	0.03	0	0	0
River	Niobr	P2	83	2	7	0.18288	0.000236538	0.31	0.46	0.21	0.02	0	0	0
River	Niobr	P3	84	1	7	0.09144	0.000184615	0.36	0.43	0.19	0.02	0	0	0
River	Niobr	P3	84	2	7	0.18288	0.000152308	0.45	0.37	0.16	0.02	0	0	0
River	Niobr	P4	85	1	7	0.09144	0.000308077	0.22	0.31	0.41	0.06	0	0	0
River	Niobr	P4	85	2	7	0.27432	0.000236154	0.29	0.31	0.36	0.04	0	0	0
River	Niobr	P4	85	3	7	0.39624	0.000157692	0.4	0.33	0.24	0.03	0	0	0
River	Niobr	P5	86	1	7	0.09144	0.000365769	0.21	0.42	0.34	0.03	0	0	0
River	Niobr	P5	86	2	7	0.18288	0.000325769	0.24	0.44	0.3	0.02	0	0	0
River	Niobr	P5	86	3	7	0.36576	0.000237692	0.31	0.45	0.22	0.02	0	0	0
River	Niobr	P6	87	1	7	0.09144	0.000348077	0.23	0.29	0.4	0.08	0	0	0
River	Niobr	P6	87	2	7	0.24384	0.000248077	0.28	0.29	0.35	0.07	0.01	0	0
River	Niobr	P6	87	3	7	0.42672	0.000234231	0.34	0.31	0.3	0.05	0	0	0
River	Niobr	P7	88	1	7	0.09144	0.000415385	0.16	0.21	0.49	0.13	0.01	0	0
River	Niobr	P7	88	2	7	0.3048	0.000336154	0.2	0.23	0.46	0.11	0	0	0
River	Niobr	P7	88	3	7	0.54864	0.000286154	0.23	0.27	0.39	0.11	0	0	0
River	Niobr	P8	89	1	7	0.09144	0.0004	0.15	0.22	0.49	0.14	0	0	0
River	Niobr	P8	89	2	7	0.33528	0.000321538	0.21	0.21	0.46	0.12	0	0	0
River	Niobr	P8	89	3	7	0.6096	0.000262308	0.3	0.23	0.4	0.07	0	0	0
River	Niobr	P9	90	1	7	0.09144	0.000309231	0.23	0.25	0.4	0.12	0	0	0
River	Niobr	P9	90	2	7	0.3048	0.000213462	0.29	0.29	0.34	0.07	0.01	0	0
River	Niobr	P9	90	3	7	0.54864	0.00018	0.36	0.28	0.29	0.07	0	0	0
River	Niobr	P10	91	1	7	0.09144	0.000201923	0.19	0.37	0.38	0.05	0.01	0	0
River	Niobr	P10	91	2	7	0.18288	0.000173077	0.38	0.35	0.25	0.02	0	0	0
River	Loup	P12	92	3	10	0.88392	8.30189e-05	0	0	0.36	0.34	0.27	0.02	0.01	0	0	0
River	Loup	P12	92	2	10	0.42672	0.000177358	0	0	0.18	0.34	0.46	0.02	0	0	0	0
River	Loup	P12	92	1	10	0.1524	0.000226415	0	0	0.18	0.29	0.48	0.04	0.01	0	0	0
River	Loup	P13	93	3	10	0.85344	8.30189e-05	0	0	0.33	0.34	0.26	0.07	0	0	0	0
River	Loup	P13	93	2	10	0.39624	0.000203774	0	0	0.15	0.33	0.38	0.12	0.02	0	0	0
River	Loup	P13	93	1	10	0.1524	0.00120755	0	0	0.03	0.08	0.35	0.48	0.05	0.01	0	0
River	Loup	P14	94	3	10	0.6096	0.000113208	0	0	0.27	0.28	0.33	0.12	0	0	0	0
River	Loup	P14	94	2	10	0.33528	0.000162264	0	0	0.21	0.28	0.38	0.12	0.01	0	0	0
River	Loup	P14	94	1	10	0.1524	0.000226415	0	0	0.13	0.27	0.45	0.15	0	0	0	0
River	Loup	P15	95	3	10	0.51816	0.000116981	0	0	0.24	0.34	0.38	0.04	0	0	0	0
River	Loup	P15	95	2	10	0.3048	0.0002	0	0	0.16	0.27	0.49	0.07	0.01	0	0	0
River	Loup	P15	95	1	10	0.1524	0.000354717	0	0	0.08	0.24	0.54	0.13	0.01	0	0	0
River	Loup	P16	96	2	10	0.27432	0.000218868	0	0	0.16	0.09	0.41	0.3	0.04	0	0	0
River	Loup	P16	96	1	10	0.1524	0.000301887	0	0	0.11	0.15	0.51	0.23	0	0	0	0
River	Loup	P17	97	3	10	0.88392	0.000124528	0	0	0.32	0.36	0.32	0	0	0	0	0
River	Loup	P17	97	2	10	0.51816	0.000158491	0	0	0.26	0.34	0.38	0.02	0	0	0	0
River	Loup	P17	97	1	10	0.1524	0.000267925	0	0	0.16	0.29	0.51	0.04	0	0	0	0
River	Loup	P18	98	3	10	0.88392	0.000135849	0	0	0.3	0.36	0.29	0.04	0.01	0	0	0
River	Loup	P18	98	2	10	0.51816	0.000203774	0	0	0.19	0.37	0.37	0.07	0	0	0	0
River	Loup	P18	98	1	10	0.1524	0.000562264	0	0	0.1	0.23	0.51	0.16	0	0	0	0
River	Loup	P19	99	3	10	0.67056	0.000158491	0	0	0.27	0.38	0.31	0.04	0	0	0	0
River	Loup	P19	99	2	10	0.39624	0.000271698	0	0	0.2	0.34	0.37	0.09	0	0	0	0
River	Loup	P19	99	1	10	0.1524	0.000373585	0	0	0.12	0.3	0.42	0.15	0.01	0	0	0
River	Loup	P20	100	2	10	0.3048	0.000430189	0	0	0.12	0.21	0.44	0.22	0.01	0	0	0
River	Loup	P20	100	1	10	0.1524	0.000641509	0	0	0.08	0.17	0.49	0.24	0.02	0	0	0
River	Loup	P21	101	2	10	0.4572	0.000218868	0	0	0.22	0.29	0.37	0.12	0	0	0	0
River	Loup	P21	101	1	10	0.1524	0.000328302	0	0	0.14	0.22	0.41	0.21	0.02	0	0	0
River	Loup	P22	102	3	10	0.85344	6.98113e-05	0	0	0.4	0.35	0.21	0.04	0	0	0	0
River	Loup	P22	102	2	10	0.57912	0.00010717	0	0	0.28	0.34	0.32	0.06	0	0	0	0
River	Loup	P22	102	1	10	0.1524	0.000153962	0	0	0.23	0.32	0.31	0.13	0.01	0	0	0
River	Loup	P23	103	3	10	0.70104	0.000129811	0	0	0.27	0.31	0.42	0	0	0	0	0
River	Loup	P23	103	2	10	0.48768	0.000161509	0	0	0.43	0.06	0.45	0.06	0	0	0	0
River	Loup	P23	103	1	10	0.1524	0.00049434	0	0	0.08	0.18	0.51	0.2	0.03	0	0	0
River	Loup	P24	104	3	10	0.54864	0.000113962	0	0	0.2	0.8	0	0	0	0	0	0
River	Loup	P24	104	2	10	0.42672	0.000160755	0	0	0.23	0.36	0.41	0	0	0	0	0
River	Loup	P24	104	1	10	0.1524	0.000315094	0	0	0.12	0.22	0.54	0.12	0	0	0	0
River	Loup	P25	105	3	10	0.36576	0.000208679	0	0	0.25	0.44	0.31	0	0	0	0	0
River	Loup	P25	105	2	10	0.27432	0.000333962	0	0	0.14	0.4	0.45	0.01	0	0	0	0
River	Loup	P25	105	1	10	0.1524	0.000622642	0	0	0.12	0.29	0.59	0	0	0	0	0
River	Loup	P26	106	3	10	0.36576	0.000138113	0	0	0.59	0.02	0.39	0	0	0	0	0
River	Loup	P26	106	2	10	0.27432	0.000266792	0	0	0.14	0.35	0.51	0	0	0	0	0
River	Loup	P26	106	1	10	0.1524	0.00108679	0	0	0.06	0.16	0.7	0.08	0	0	0	0
River	Loup	P27	107	3	10	0.48768	6.07547e-05	0	0	0.43	0.27	0.25	0.05	0	0	0	0
River	Loup	P27	107	2	10	0.33528	6.18868e-05	0	0	0.39	0.29	0.26	0.06	0	0	0	0
River	Loup	P27	107	1	10	0.1524	9.13208e-05	0	0	0.27	0.26	0.37	0.1	0	0	0	0
River	Loup	P28	108	3	10	0.6096	0.000110566	0	0	0.23	0.28	0.4	0.09	0	0	0	0
River	Loup	P28	108	2	10	0.39624	0.000151321	0	0	0.16	0.23	0.44	0.17	0	0	0	0
River	Loup	P28	108	1	10	0.1524	0.000211698	0	0	0.13	0.2	0.48	0.19	0	0	0	0
River	Loup	P29	109	3	10	0.85344	8.71698e-05	0	0	0.31	0.35	0.34	0	0	0	0	0
River	Loup	P29	109	2	10	0.54864	0.000119623	0	0	0.25	0.32	0.39	0.04	0	0	0	0
River	Loup	P29	109	1	10	0.1524	0.000235849	0	0	0.12	0.29	0.51	0.08	0	0	0	0
River	Loup	P30	110	3	10	0.79248	9.28302e-05	0	0	0.27	0.31	0.42	0	0	0	0	0
River	Loup	P30	110	2	10	0.48768	0.000146792	0	0	0.23	0.31	0.39	0.07	0	0	0	0
River	Loup	P30	110	1	10	0.1524	0.00022566	0	0	0.12	0.21	0.48	0.19	0	0	0	0
River	Loup	P31	111	3	10	0.51816	2.90566e-05	0	0	0.56	0.44	0	0	0	0	0	0
River	Loup	P31	111	2	10	0.33528	4.90566e-05	0	0	0.52	0.28	0.16	0.04	0	0	0	0
River	Loup	P31	111	1	10	0.1524	6.49057e-05	0	0	0.32	0.33	0.35	0	0	0	0	0
River	Yellow	P12	112	1	51	0.125	0.0116325	0	0.00230408	0.00235039	0.00244819	0.00260125	0.00279081	0.00298292	0.00314786	0.00327584	0.00337654	0.00347388	0.00360246	0.00380348	0.00411533	0.00456618	0.00516617	0.00590035	0.00672597	0.007576	0.00837214	0.0090446	0.00955754	0.00993799	0.0103054	0.0108876	0.0120104	0.0140574	0.0174213	0.0224188	0.029185	0.037576	0.0471194	0.0570201	0.0662297	0.0735809	0.0780006	0.0787233	0.0754532	0.0684305	0.0585205	0.0469894	0.035211
River	Yellow	P12	112	2	51	0.625	0.00541546	0	0.00339846	0.00345418	0.00356511	0.00373944	0.00395787	0.00418405	0.00438941	0.00457158	0.00475088	0.00496084	0.00524201	0.00563391	0.00616554	0.00684811	0.00767133	0.00860309	0.00959607	0.0106017	0.0115902	0.0125715	0.0136143	0.0148607	0.0165288	0.0188917	0.0222205	0.0267131	0.032452	0.0393244	0.0469772	0.0548202	0.0620781	0.0678836	0.071405	0.0719975	0.0693507	0.0635585	0.055124	0.0448662	0.0339281	0.0234799	0.0143413
River	Yellow	P12	112	3	51	1.25	0.00388018	0	0.00504534	0.00519128	0.00544514	0.00582257	0.00629811	0.00681894	0.00733858	0.00784172	0.00833881	0.00885431	0.00942214	0.0100778	0.0108529	0.0117659	0.0128203	0.0140048	0.0153011	0.016697	0.0182009	0.0198507	0.0217186	0.0239114	0.0265601	0.0297947	0.0336914	0.0382262	0.0432673	0.0485294	0.0535757	0.0578563	0.0607752	0.0617773	0.060448	0.056618	0.0504472	0.0424113	0.0332876	0.0239241	0.0152992	0.00855978	0.00266103
River	Yellow	P13	113	1	51	0.1095	0.00505594	0	0.00324239	0.00330329	0.0034277	0.00362284	0.00386743	0.00412194	0.00435332	0.00455361	0.00473707	0.00493145	0.00517287	0.0055003	0.00594645	0.00653016	0.00725076	0.0080849	0.00898935	0.00991031	0.0107998	0.0116364	0.0124467	0.013326	0.0144516	0.0160776	0.0184986	0.0219931	0.0267792	0.0329302	0.0402988	0.0484706	0.0567664	0.0642976	0.0700758	0.0731753	0.0729329	0.0690992	0.0619214	0.052112	0.0408717	0.0295535	0.019309
River	Yellow	P13	113	2	51	0.5475	0.0035919	0	0.00357384	0.00362325	0.00373529	0.00391952	0.00415605	0.00440665	0.00464097	0.00485585	0.00507104	0.0053189	0.00563847	0.00606848	0.00663905	0.00736317	0.00823223	0.00921474	0.0102625	0.0113249	0.0123686	0.0133979	0.0144727	0.0157237	0.0173578	0.0196412	0.0228479	0.0271938	0.0327945	0.0395803	0.0472367	0.0551858	0.0626225	0.0686043	0.0721922	0.0726332	0.0695538	0.0630661	0.0537703	0.0426631	0.0310918	0.0203122	0.0116018
River	Yellow	P13	113	3	51	1.095	0.00278465	0	0.00417135	0.00426886	0.00443405	0.00468234	0.00499945	0.00535165	0.00571058	0.00607071	0.00644379	0.00684865	0.00730686	0.00783611	0.00844736	0.00913989	0.00990294	0.0107202	0.0115808	0.0124956	0.0135125	0.0147265	0.0162821	0.0183656	0.0211852	0.0249307	0.0297085	0.0354837	0.0420762	0.0491113	0.0560277	0.062132	0.0666839	0.0690024	0.0685816	0.065205	0.0590192	0.0505226	0.0405049	0.0299197	0.019865	0.0112723	0.0047372
River	Yellow	P14	114	1	51	0.1	0.00654778	0	0.00271956	0.00279779	0.00291909	0.00308715	0.00328426	0.00347956	0.00364919	0.00379167	0.00392561	0.00408243	0.00430102	0.00462035	0.00506924	0.00565695	0.0063661	0.00714903	0.00793172	0.00862738	0.00916046	0.00949533	0.00966695	0.0098097	0.0101793	0.0111463	0.0131501	0.0166161	0.0218804	0.0290775	0.038036	0.0482246	0.0587698	0.0685384	0.0762825	0.0808405	0.0813838	0.0776016	0.0697926	0.0588061	0.0460486	0.0331127	0.0212776
River	Yellow	P14	114	2	51	0.5	0.00370152	0	0.00375142	0.0038719	0.00405599	0.00431102	0.00461571	0.0049315	0.00522844	0.00550386	0.00577722	0.00607892	0.00644301	0.00689831	0.00746108	0.0081279	0.00887377	0.00965402	0.0104142	0.0111082	0.0117229	0.0123007	0.0129589	0.0139001	0.0154097	0.0178226	0.0214535	0.0265113	0.0330503	0.0408797	0.0495154	0.0581933	0.0659488	0.0717483	0.0746625	0.0740597	0.0697728	0.0621495	0.0519771	0.0403677	0.0286559	0.0178643	0.00969776
River	Yellow	P14	114	3	51	1	0.00204005	0	0.00561729	0.00583178	0.00616734	0.00664245	0.00723301	0.00788639	0.00855553	0.00922242	0.00989038	0.0105718	0.0112849	0.0120474	0.012875	0.0137742	0.0147433	0.0157739	0.0168603	0.0180128	0.0192683	0.0206953	0.0223933	0.0244866	0.0271072	0.0303655	0.0342974	0.0388237	0.0437515	0.0487429	0.0533338	0.0569887	0.0591724	0.05943	0.0574649	0.0532121	0.0468926	0.0389799	0.0301802	0.0212279	0.0129644	0.00640113	0.000830061
River	Yellow	P15	115	1	51	0.0775	0.00347215	0	0.00466244	0.0047714	0.00497917	0.00530186	0.00571518	0.00616623	0.00660479	0.0070079	0.00737791	0.00773545	0.00811895	0.00858373	0.00919632	0.0100274	0.0111457	0.0126091	0.0144569	0.0167039	0.0193377	0.0223209	0.025594	0.0290827	0.0327059	0.0363848	0.0400262	0.0435225	0.0467679	0.0496325	0.0519628	0.0535806	0.0542895	0.0538905	0.0522109	0.0491457	0.044706	0.0390459	0.0324711	0.0254152	0.0184842	0.0122748	0.0072512
River	Yellow	P15	115	2	51	0.3875	0.00249078	0	0.00494286	0.00506554	0.00529371	0.00564319	0.00608736	0.00656956	0.00703575	0.00746036	0.00784435	0.00820767	0.00858813	0.00904032	0.00962903	0.0104219	0.0114839	0.0128699	0.0146202	0.0167569	0.0192837	0.022186	0.0254296	0.028962	0.032712	0.0365901	0.0404677	0.0441775	0.047537	0.0503318	0.0523334	0.0533196	0.0530993	0.0515408	0.0486049	0.044378	0.0390868	0.0330783	0.0267811	0.0206455	0.0151497	0.0106494	0.0073611
River	Yellow	P15	115	3	51	0.775	0.00192472	0	0.00591031	0.00614198	0.00652279	0.00706691	0.00773374	0.00844376	0.00912091	0.00972682	0.01026	0.0107467	0.0112396	0.0118154	0.0125668	0.0135903	0.014977	0.0168012	0.019111	0.0219204	0.0252015	0.0288805	0.0328367	0.036908	0.0409009	0.0446093	0.0478142	0.05031	0.0519375	0.0525838	0.0521997	0.0507947	0.0484166	0.0451359	0.0410397	0.0362431	0.0309062	0.0252453	0.0195366	0.014104	0.00934794	0.00558699	0.00302729
River	Yellow	P16	116	1	51	0.09	0.00542494	0	0.0052659	0.00536344	0.00558076	0.00593163	0.00638128	0.00686082	0.00730572	0.0076869	0.0080106	0.00831045	0.00864481	0.00909261	0.00973807	0.0106582	0.0119101	0.0135176	0.0154632	0.0176842	0.0200798	0.0225238	0.0248848	0.0270525	0.0289677	0.0306455	0.0321704	0.0336844	0.0353624	0.0373589	0.0397514	0.0424895	0.0453718	0.0480502	0.0500671	0.0509243	0.0501874	0.0475843	0.0430881	0.0369533	0.0297851	0.0223605	0.0154668
River	Yellow	P16	116	2	51	0.45	0.00488926	0	0.00466304	0.00477124	0.00498326	0.00531293	0.00573084	0.00617749	0.00659767	0.00696833	0.00729815	0.00762001	0.00798851	0.00847582	0.00916134	0.0101223	0.0114249	0.0131142	0.0152072	0.0176883	0.0205103	0.0236001	0.0268676	0.0302191	0.0335718	0.0368674	0.0400581	0.043102	0.0459661	0.0485868	0.0508489	0.0525687	0.0535	0.0533651	0.0519083	0.0489669	0.0445403	0.0388205	0.0321791	0.025115	0.0182492	0.0121056	0.00725767
River	Yellow	P16	116	3	51	0.9	0.00407157	0	0.0052213	0.00540659	0.00571045	0.00614604	0.00668017	0.00724703	0.00778453	0.00826421	0.00869101	0.00909541	0.00953059	0.0100679	0.0107869	0.011764	0.0130623	0.0147207	0.0167466	0.0191126	0.0217592	0.0246034	0.0275505	0.0305084	0.0334031	0.0361898	0.0388387	0.0413298	0.0436506	0.0457605	0.0475701	0.0489299	0.0496358	0.0494549	0.0481681	0.0456318	0.0418353	0.0369165	0.0311531	0.0249263	0.0187512	0.0131188	0.00842526
River	Yellow	P17	117	1	51	0.1	0.00648969	0	0.00284233	0.00293227	0.00308461	0.00330462	0.0035717	0.0038472	0.00409592	0.00430345	0.00447607	0.00463614	0.00481984	0.00507401	0.00544674	0.00597866	0.00669343	0.00758807	0.00862697	0.00974175	0.0108416	0.011831	0.0126356	0.0132334	0.0136914	0.0141913	0.0150277	0.016578	0.0192555	0.0234265	0.0293018	0.0368262	0.0456111	0.0549191	0.0637165	0.0708028	0.0750376	0.0755842	0.0721016	0.0648284	0.0546737	0.0429682	0.0311767
River	Yellow	P17	117	2	51	0.5	0.00382524	0	0.00496922	0.00512073	0.00539199	0.00579668	0.00630407	0.0068524	0.00738367	0.00787156	0.00831974	0.0087533	0.00921557	0.00976209	0.0104505	0.011328	0.0124222	0.0137326	0.0152286	0.0168522	0.0185291	0.020186	0.0217722	0.0232828	0.0247789	0.0263904	0.0282903	0.030658	0.0336439	0.0373005	0.041522	0.0460138	0.0503126	0.0538431	0.0560039	0.0562717	0.0543183	0.0501014	0.0439095	0.0363192	0.0281874	0.0203813	0.0136275
River	Yellow	P17	117	3	51	1	0.0022799	0	0.0063148	0.00654932	0.0069426	0.00751611	0.00823723	0.00903517	0.00984251	0.0106272	0.0113885	0.0121458	0.0129368	0.0138087	0.0148139	0.015995	0.0173793	0.0189726	0.0207614	0.0227195	0.0248182	0.0270343	0.0293553	0.0317829	0.0343306	0.0370114	0.0398053	0.0426418	0.0454011	0.0478881	0.049835	0.0509283	0.0508576	0.0493792	0.0463778	0.041916	0.0362483	0.0297688	0.0229724	0.0163653	0.010503	0.00589497	0.00237149
River	Yellow	P18	118	1	51	0.09	0.00460625	0	0.00295134	0.00299627	0.00310287	0.00327881	0.00350428	0.00374098	0.00395471	0.00413343	0.00428619	0.00443697	0.00462143	0.00488327	0.00526463	0.00579738	0.00649526	0.00734738	0.00831635	0.00934221	0.0103556	0.0112975	0.0121438	0.0129317	0.0137858	0.0149293	0.0166653	0.0193321	0.0232573	0.0286702	0.035606	0.0438217	0.0527614	0.0615759	0.0692038	0.0745183	0.0765502	0.0747054	0.0689246	0.059715	0.0482183	0.0359052	0.0241314
River	Yellow	P18	118	2	51	0.45	0.00324694	0	0.00374166	0.00380399	0.00394004	0.00416098	0.00444621	0.00475412	0.0050486	0.00531964	0.00558041	0.00585844	0.00619048	0.00661551	0.00716596	0.00785936	0.0086929	0.00964014	0.0106541	0.0116773	0.0126592	0.0135768	0.0144563	0.0153937	0.01657	0.0182449	0.0207167	0.0242598	0.0290744	0.0351992	0.0424395	0.0503307	0.0581539	0.0650029	0.0699026	0.0719771	0.0706493	0.065785	0.0577575	0.0473878	0.0359422	0.0247729	0.0149605
River	Yellow	P18	118	3	51	0.9	0.00194265	0	0.00566528	0.00580737	0.00607362	0.00648219	0.00700445	0.00757981	0.0081533	0.00870378	0.00923875	0.00978229	0.010371	0.0110476	0.0118547	0.0128232	0.0139672	0.0152806	0.0167404	0.0183153	0.0199786	0.0217241	0.0235795	0.0256146	0.0279393	0.0306819	0.0339394	0.0377333	0.0419932	0.046508	0.0509163	0.0547307	0.0573988	0.0583905	0.0572988	0.053939	0.0484187	0.0411151	0.0326817	0.0238256	0.0154208	0.00866206	0.00224845
River	Yellow	P19	119	1	51	0.0825	0.00660838	0	0.00256846	0.00265786	0.00279613	0.0029857	0.00320693	0.00342587	0.00361414	0.00376422	0.00388853	0.00401397	0.00417845	0.00442579	0.00479498	0.00531126	0.00597688	0.00676326	0.0076086	0.00842409	0.0091126	0.00959412	0.00983726	0.00989428	0.00993659	0.0102706	0.0113197	0.0135654	0.0174767	0.0233986	0.0314205	0.0412683	0.0522632	0.0633493	0.0731987	0.0804011	0.0837512	0.08251	0.0765874	0.0665657	0.0537664	0.0399221	0.0265435
River	Yellow	P19	119	2	51	0.4125	0.00257026	0	0.00415713	0.00430455	0.00453107	0.00484954	0.00524122	0.00566648	0.0060912	0.00650672	0.00692641	0.0073767	0.00789317	0.00851179	0.00926365	0.0101651	0.011214	0.0123882	0.0136503	0.014958	0.0162794	0.0176087	0.0189815	0.0204877	0.0222774	0.0245468	0.0274927	0.0312592	0.0359079	0.041352	0.0473169	0.0533327	0.0587651	0.0628832	0.0649625	0.0644188	0.0609534	0.0546535	0.0460099	0.0358738	0.0254168	0.0156856	0.00808503
River	Yellow	P19	119	3	51	0.825	0.00167853	0	0.00590986	0.00615275	0.00652646	0.00704798	0.00768798	0.00838561	0.0090856	0.00976616	0.0104339	0.0111113	0.0118319	0.012631	0.013541	0.0145794	0.0157455	0.0170189	0.0183675	0.0197604	0.0211834	0.0226518	0.0242196	0.0259825	0.0280723	0.0306323	0.0337693	0.0375092	0.0417826	0.0463758	0.0509169	0.054893	0.0577022	0.0587366	0.057498	0.0537285	0.0474845	0.0392795	0.0296051	0.0197711	0.0108893	0.00153586	0.000197478
River	Yellow	P20	120	1	51	0.155	0.00634409	0	0.00447779	0.00458499	0.00478367	0.00508881	0.00547691	0.00589668	0.0062985	0.00665811	0.00697598	0.00727122	0.00758046	0.00795627	0.00845917	0.00915059	0.0100867	0.0113118	0.0128557	0.0147332	0.0169477	0.019496	0.0223716	0.0255699	0.0290899	0.0329313	0.0370641	0.0414097	0.0458484	0.0501797	0.05412	0.0573139	0.0593641	0.0598835	0.0585649	0.055261	0.0500452	0.0432215	0.0352934	0.026909	0.0188499	0.0117346	0.00636612
River	Yellow	P20	120	2	51	0.775	0.0047878	0	0.00487201	0.00504341	0.00532582	0.00573196	0.00623104	0.00676051	0.00725911	0.00769477	0.00806538	0.00839198	0.00871633	0.00909872	0.00960996	0.0103227	0.0113045	0.0126089	0.0142712	0.0163029	0.0186916	0.0214017	0.0243804	0.0275648	0.0308935	0.0343165	0.0377839	0.0412419	0.04464	0.04789	0.0508436	0.0532729	0.0548792	0.0553328	0.0543384	0.0517138	0.0474478	0.041708	0.034819	0.027249	0.0196451	0.0125912	0.00702573
River	Yellow	P20	120	3	51	1.55	0.00336782	0	0.00436985	0.00443438	0.00458122	0.00482918	0.00516128	0.00553427	0.00590526	0.00625307	0.0065767	0.00688901	0.00721612	0.00759675	0.00807826	0.0087122	0.00955263	0.0106538	0.0120707	0.0138588	0.0160727	0.018763	0.0219682	0.0257056	0.0299542	0.0346387	0.0395956	0.0445687	0.0492464	0.0532528	0.0561928	0.057707	0.057525	0.0555117	0.0517043	0.0463324	0.0398041	0.032648	0.025448	0.0187652	0.0131433	0.00894544	0.00633429
River	Yellow	P21	121	1	51	0.116	0.00879044	0	0.00359096	0.00370787	0.00390179	0.00418197	0.00452568	0.00488783	0.00522666	0.0055247	0.00578837	0.00604187	0.00632445	0.00668656	0.00718146	0.00785608	0.00874365	0.00985694	0.0111858	0.0126988	0.0143519	0.0161	0.0179113	0.0197839	0.0217617	0.0239422	0.0264551	0.0294324	0.0329848	0.037139	0.0417858	0.0466487	0.0512908	0.0551617	0.0576802	0.0583436	0.056843	0.0531292	0.0474368	0.0402547	0.0323561	0.0245828	0.0176927
River	Yellow	P21	121	2	51	0.58	0.00605075	0	0.00453633	0.00461807	0.00480325	0.00511114	0.00551955	0.0059766	0.00643245	0.00686482	0.00727714	0.00769021	0.00813966	0.0086718	0.00933895	0.0101925	0.0112798	0.0126405	0.0143077	0.0163096	0.0186707	0.0214113	0.0245452	0.0280766	0.0319922	0.0362512	0.0407527	0.0453226	0.049735	0.0536896	0.0568374	0.0588221	0.0593276	0.0581268	0.0551282	0.050412	0.0442397	0.0370281	0.0292973	0.0216244	0.0146319	0.00871238	0.0045854
River	Yellow	P21	121	3	51	1.16	0.00393754	0	0.00480859	0.00493498	0.00516131	0.00550228	0.00593123	0.00639319	0.0068379	0.00724508	0.00762132	0.00799122	0.00839494	0.00888499	0.00951905	0.0103534	0.0114386	0.0128148	0.0145117	0.016549	0.0189399	0.0216923	0.0248094	0.0282896	0.0321209	0.0362714	0.0406558	0.0451213	0.0494664	0.0534157	0.0566366	0.0587664	0.0594532	0.0584119	0.0554874	0.0507151	0.0443508	0.0368271	0.0287386	0.0206782	0.0133359	0.00757896	0.00259291
River	Yellow	P22	122	1	51	0.12	0.00674462	0	0.00331939	0.00327047	0.00324597	0.00326548	0.00332844	0.00342192	0.00353842	0.00368582	0.00387871	0.00412733	0.00443327	0.00478677	0.00516902	0.00555656	0.0059323	0.00630022	0.00670548	0.00725492	0.00812832	0.00957539	0.0118957	0.0153998	0.0203485	0.0268773	0.0349006	0.0440523	0.053733	0.0630985	0.0711666	0.0769776	0.0797493	0.0790116	0.0747012	0.0671999	0.0572779	0.0459276	0.0342582	0.0232189	0.0137076	0.00669849	0.000875258
River	Yellow	P22	122	2	51	0.6	0.00572294	0	0.00449729	0.00453033	0.00464339	0.00485963	0.00516667	0.00552613	0.00589973	0.00626881	0.00662974	0.0069852	0.00734269	0.00771467	0.00811963	0.0085836	0.00914617	0.00986653	0.0108325	0.0121661	0.0140203	0.0165643	0.0199593	0.0243244	0.0296933	0.0359753	0.0429046	0.0500359	0.0568173	0.0626041	0.0667586	0.0687567	0.0682698	0.0652194	0.0597973	0.0524502	0.0438134	0.0345948	0.025531	0.0172024	0.0101599	0.00508533	0.000683573
River	Yellow	P22	122	3	51	1.2	0.00369328	0	0.00599623	0.00611876	0.00636965	0.00677334	0.00730381	0.00789775	0.00849142	0.00904962	0.0095627	0.0100383	0.0105017	0.0109977	0.0115883	0.0123493	0.0133683	0.0147402	0.0165647	0.0189387	0.0219424	0.0256212	0.0299654	0.0348908	0.040221	0.0456869	0.050918	0.0554807	0.0589537	0.0609533	0.0612034	0.05958	0.0561219	0.0510211	0.0446011	0.0372875	0.0295561	0.0219208	0.0147812	0.00863075	0.00381412	0.000197909	0
River	Yellow	P23	123	1	51	0.2	0.00426481	0	0.00481477	0.00491187	0.00508558	0.00535844	0.00572069	0.00614046	0.00658904	0.0070571	0.00754625	0.0080577	0.0085899	0.00913587	0.00968733	0.0102361	0.0107836	0.0113525	0.0120028	0.0128477	0.0140592	0.0158585	0.01849	0.0221791	0.027074	0.0331819	0.0402957	0.0479669	0.0555747	0.0623438	0.0674644	0.0702368	0.0701927	0.06718	0.0614009	0.0533928	0.0439155	0.0338768	0.0239938	0.0151855	0.00808403	0.00182191	0.000313348
River	Yellow	P23	123	2	51	1	0.00423482	0	0.00444924	0.00446615	0.00454942	0.00472176	0.00497472	0.00527932	0.00561211	0.00597258	0.00637485	0.00683452	0.00736287	0.00796011	0.0086173	0.00931629	0.0100392	0.0107812	0.0115693	0.0124809	0.013655	0.0152913	0.0176339	0.0209376	0.0254131	0.0311586	0.0380735	0.0458136	0.0538356	0.0613933	0.0676339	0.071737	0.0730487	0.0711946	0.0661647	0.0583484	0.0484586	0.0375227	0.0263582	0.0162869	0.00820959	0.000469331	0
River	Yellow	P23	123	3	51	2	0.00331505	0	0.00543591	0.00553196	0.00573414	0.00607009	0.00652614	0.00705846	0.00762336	0.00819994	0.00878429	0.00937898	0.00999144	0.0106313	0.0113145	0.0120612	0.0129022	0.0138852	0.0150858	0.0166166	0.0186241	0.0212726	0.0247161	0.0290601	0.034313	0.0403433	0.0468288	0.0532619	0.059031	0.0634562	0.0659107	0.0659443	0.0633658	0.0582836	0.0511036	0.0424836	0.0332261	0.0241734	0.0160143	0.0093722	0.00462213	0.00143488	0.000326869
River	Yellow	P24	124	1	51	0.1265	0.00641373	0	0.00310002	0.00308586	0.00310382	0.00316555	0.00326131	0.00336937	0.00347716	0.00359534	0.00375175	0.00397943	0.0043083	0.00475464	0.00531488	0.00596127	0.00664398	0.00729847	0.0078617	0.00829713	0.0086239	0.0089423	0.00945106	0.0104509	0.0123267	0.0154925	0.0202979	0.0269168	0.0352985	0.0450719	0.0555219	0.0656471	0.0742819	0.0802661	0.0826422	0.0808561	0.074906	0.0653547	0.0532441	0.039904	0.0268852	0.0155197	0.00669246
River	Yellow	P24	124	2	51	0.6325	0.00414965	0	0.0037495	0.00375508	0.00381112	0.00393464	0.00411649	0.00433161	0.00456249	0.00481458	0.0051086	0.00546752	0.00590921	0.00643737	0.00703972	0.00768607	0.00833481	0.0089442	0.00949153	0.00999721	0.0105469	0.0113053	0.0125175	0.0144934	0.0175686	0.0220369	0.0280532	0.0355455	0.0442068	0.053439	0.0623889	0.0700593	0.0754559	0.0777491	0.0764249	0.0714067	0.0631019	0.0523217	0.0402057	0.0279296	0.016753	0.0079948	0.00100363
River	Yellow	P24	124	3	51	1.265	0.00284996	0	0.00512154	0.0051674	0.00529924	0.00554476	0.00589645	0.00632304	0.00679703	0.00731186	0.00787119	0.00847591	0.00912197	0.0097976	0.0104886	0.0111777	0.0118542	0.0125261	0.0132375	0.0140873	0.0152368	0.0169036	0.0193394	0.0227913	0.0274419	0.03334	0.0403165	0.047947	0.0556109	0.062505	0.0677629	0.0706101	0.0705027	0.0672349	0.0609974	0.0523715	0.0422187	0.031561	0.0212829	0.0123242	0.00533028	0.00027171	0
River	Yellow	P25	125	1	51	0.1075	0.0084772	0	0.00281192	0.00284266	0.00289601	0.00297641	0.00307029	0.00315528	0.00322058	0.00328001	0.00336615	0.00351861	0.00377497	0.00415942	0.00467303	0.0052873	0.00594335	0.00655793	0.00704011	0.00732048	0.00738753	0.0073208	0.00731652	0.00769979	0.00891459	0.0114702	0.0158403	0.0223328	0.0310124	0.0415781	0.0533068	0.0650983	0.0756083	0.0834441	0.0873991	0.0867019	0.0812197	0.0714984	0.0586756	0.0442491	0.0299792	0.0173975	0.00747668
River	Yellow	P25	125	2	51	0.5375	0.00349836	0	0.0041999	0.00426525	0.00438514	0.0045778	0.00483488	0.0051316	0.00544981	0.00579249	0.00617493	0.0066118	0.00711131	0.00766775	0.00826279	0.00886471	0.00943707	0.00995127	0.0104071	0.010857	0.0114257	0.0123156	0.0137984	0.0161877	0.0197897	0.0248304	0.0313582	0.0391679	0.0478162	0.0565906	0.0645837	0.0708341	0.0744813	0.074912	0.0718762	0.065558	0.0565632	0.0457967	0.0343521	0.023272	0.0135773	0.00618793	0.00074259
River	Yellow	P25	125	3	51	1.075	0.0022573	0	0.00572017	0.00589974	0.00618309	0.00659197	0.00710856	0.00768738	0.00828572	0.00888509	0.00948411	0.0100869	0.0107007	0.011332	0.0119886	0.0126768	0.0134065	0.0141988	0.0150999	0.016196	0.0176194	0.0195416	0.0221524	0.0256274	0.0300785	0.0354998	0.0417011	0.048287	0.0547165	0.0603193	0.0643971	0.0663427	0.0657364	0.0624186	0.0565223	0.0484723	0.0389801	0.0287165	0.018953	0.00981831	0.00243926	0.000128177	0
River	Yellow	P26	126	1	51	0.11	0.0073178	0	0.00466137	0.00473507	0.00488718	0.00513535	0.00546067	0.00581863	0.00616808	0.00649294	0.00679886	0.00710495	0.00744167	0.00784855	0.00836902	0.00904844	0.00993391	0.0110739	0.0125212	0.0143348	0.0165797	0.0193241	0.0226299	0.0265402	0.0310608	0.0361401	0.0416274	0.0472615	0.0527089	0.0575512	0.0613312	0.063607	0.0640073	0.0622894	0.0583963	0.0525032	0.0450236	0.0365343	0.0277501	0.0193089	0.0118951	0.0064284	0.00142978
River	Yellow	P26	126	2	51	0.55	0.00594375	0	0.00581197	0.00605964	0.00643577	0.00695729	0.00759147	0.00826856	0.00891788	0.00949815	0.00999758	0.0104271	0.0108199	0.0112329	0.0117425	0.0124373	0.0134137	0.0147673	0.0165873	0.0189479	0.0218976	0.0254469	0.0295571	0.0341316	0.0390084	0.0439638	0.0486987	0.052865	0.0561229	0.0581532	0.0587106	0.0576559	0.0549695	0.0507559	0.0452391	0.0387465	0.0316764	0.024483	0.0175682	0.011399	0.00636219	0.00231513	0.000358774
River	Yellow	P26	126	3	51	1.1	0.00425168	0	0.00577416	0.00590348	0.006156	0.00655554	0.00707696	0.00765909	0.0082408	0.00878953	0.0092989	0.0097806	0.0102646	0.0108002	0.0114532	0.0123033	0.0134428	0.0149726	0.0169978	0.019618	0.0229107	0.026913	0.0315994	0.0368626	0.0424956	0.0481923	0.0535398	0.0580609	0.0612967	0.062839	0.0624131	0.0599291	0.0554951	0.0494071	0.042119	0.0341937	0.0262168	0.0187307	0.0121241	0.00672584	0.00271676	0.000130951	0
River	Yellow	P27	127	1	51	0.115	0.00835505	0	0.00358084	0.00362218	0.0037249	0.003901	0.00413275	0.00438221	0.00461568	0.00482275	0.00501453	0.0052164	0.00546443	0.00580101	0.00626663	0.00689346	0.00769998	0.00868689	0.00983827	0.0111282	0.0125329	0.014045	0.0156881	0.0175301	0.0196925	0.0223454	0.0256715	0.0298197	0.034879	0.040805	0.04737	0.0541389	0.0604887	0.0656687	0.0688989	0.0695028	0.0670615	0.0615278	0.0532685	0.0430415	0.0319964	0.0212773	0.0123225
River	Yellow	P27	127	2	51	0.575	0.00423766	0	0.00504723	0.00515413	0.00535787	0.00567536	0.00608255	0.00652663	0.00695857	0.0073591	0.00773711	0.00812126	0.00855677	0.00909932	0.00980582	0.0107245	0.011888	0.0133082	0.0149759	0.0168668	0.0189525	0.0212138	0.0236551	0.0263165	0.0292779	0.0326465	0.0365101	0.0408898	0.0457207	0.0507884	0.0557082	0.0599428	0.0628602	0.0638232	0.0623058	0.0580194	0.0510004	0.0417005	0.0307629	0.0193798	0.0088202	0.000460056	0
River	Yellow	P27	127	3	51	1.15	0.00339382	0	0.00601668	0.00623018	0.00659525	0.00713553	0.0078216	0.00858481	0.00935599	0.0100969	0.0107992	0.0114762	0.012163	0.0129124	0.0137904	0.014865	0.0162003	0.0178494	0.0198499	0.0222205	0.0249597	0.0280428	0.0314211	0.0350223	0.0387514	0.0424922	0.0460871	0.0493399	0.0520382	0.0539406	0.0547993	0.0543899	0.052548	0.0492053	0.0444247	0.0384245	0.03156	0.024334	0.0171612	0.0107045	0.00545843	0.000815931	0.000115877
River	Yellow	P28	128	1	51	0.134	0.00778177	0	0.00289099	0.00293337	0.00303246	0.00319272	0.0033918	0.00359103	0.0037598	0.00389415	0.00401429	0.00415621	0.00436576	0.0046912	0.00517042	0.00582099	0.0066328	0.00756452	0.00854741	0.00949743	0.0103362	0.0110169	0.011553	0.0120471	0.012713	0.0138738	0.0159214	0.0192444	0.0241613	0.0308137	0.0390639	0.0484313	0.0580992	0.0669916	0.0739173	0.077775	0.0778001	0.0737417	0.0659382	0.055252	0.0430593	0.030866	0.0199286
River	Yellow	P28	128	2	51	0.67	0.0042023	0	0.00470016	0.00481542	0.00502178	0.00533529	0.00573543	0.0061773	0.00662187	0.00705844	0.00749984	0.00797117	0.0085046	0.00913103	0.00987514	0.0107463	0.0117361	0.0128178	0.0139545	0.0151128	0.0162812	0.0174881	0.0188144	0.0204005	0.0224405	0.0251542	0.0287282	0.0332535	0.0386976	0.0448377	0.0512363	0.0572633	0.0621659	0.0651775	0.0656541	0.0632213	0.0578915	0.0500771	0.0405334	0.0302211	0.0202693	0.0116506	0.00495584
River	Yellow	P28	128	3	51	1.34	0.00267261	0	0.00527946	0.00541436	0.00565149	0.00600552	0.0064489	0.00692593	0.00738757	0.0078174	0.00822661	0.00864207	0.00910098	0.00964464	0.0103109	0.0111258	0.0121001	0.0132278	0.0144932	0.0158838	0.0174058	0.0190957	0.0210263	0.023307	0.0260722	0.0294531	0.033521	0.0382399	0.0434594	0.0488729	0.0540269	0.058367	0.061308	0.0623192	0.0610171	0.0572575	0.0512029	0.0432968	0.0342649	0.0248768	0.0160547	0.00901861	0.00241393
River	Yellow	P29	129	1	51	0.085	0.00441047	0	0.00571724	0.00593684	0.00628899	0.00678824	0.00739822	0.0080466	0.00866475	0.00922061	0.00971911	0.0101948	0.0107104	0.0113512	0.0122131	0.0133882	0.0149509	0.0169447	0.0193729	0.0221955	0.0253325	0.0286712	0.0320778	0.0354144	0.0385581	0.0414168	0.0439177	0.0460059	0.0476444	0.0487845	0.0493545	0.0492531	0.0483577	0.0465477	0.0437405	0.0399364	0.035249	0.0298958	0.024167	0.0183993	0.0129964	0.00826361	0.0046889
River	Yellow	P29	129	2	51	0.425	0.00356627	0	0.0053615	0.00549531	0.00573587	0.00609777	0.00654964	0.00702892	0.0074797	0.00788298	0.00825502	0.00863722	0.00909142	0.00969315	0.0105211	0.011647	0.0131277	0.0149974	0.0172629	0.0199029	0.0228707	0.0261014	0.0295197	0.0330491	0.0366176	0.04016	0.0435938	0.0468141	0.0497041	0.0521089	0.0538387	0.0546745	0.0543875	0.0527734	0.0497015	0.0451727	0.0393626	0.0325872	0.0253435	0.0180867	0.0114116	0.00640937	0.000943993
River	Yellow	P29	129	3	51	0.85	0.00312058	0	0.00683532	0.00703622	0.00739765	0.00794102	0.00862668	0.00937054	0.01009	0.0107428	0.0113278	0.011879	0.0124659	0.0131916	0.0141794	0.0155567	0.0174381	0.0199055	0.0229919	0.0266651	0.0308209	0.0352854	0.0398266	0.0441751	0.048053	0.0512079	0.0534225	0.0545461	0.0545096	0.0533113	0.0510095	0.047705	0.0435324	0.0386568	0.0332719	0.0276018	0.0218875	0.0163829	0.0112569	0.00673974	0.00300055	0.000155489	0
River	Yellow	P30	130	1	51	0.11	0.00514307	0	0.0045856	0.00476618	0.00504509	0.0054292	0.00588485	0.00635067	0.00677056	0.00712088	0.00741018	0.00767097	0.00795462	0.00832601	0.00885107	0.00958622	0.0105687	0.0118081	0.0132833	0.0149453	0.0167279	0.0185612	0.0203896	0.0221924	0.0240033	0.0259199	0.0280836	0.0306526	0.0337781	0.0375441	0.0419103	0.0466642	0.0514072	0.0555811	0.0585359	0.0596399	0.0584257	0.0547047	0.0486344	0.0406963	0.0317357	0.0227395	0.014447
River	Yellow	P30	130	2	51	0.55	0.00451995	0	0.00579313	0.00594415	0.00621711	0.00662986	0.00715183	0.00771855	0.00826972	0.0087791	0.00925193	0.00971497	0.0102136	0.010807	0.0115606	0.012536	0.0137849	0.0153426	0.0172261	0.0194357	0.0219565	0.0247614	0.0278131	0.0310663	0.0344681	0.0379546	0.0414278	0.0447519	0.0477713	0.0502926	0.0520983	0.0529642	0.0526838	0.0511008	0.0481465	0.0438783	0.0384998	0.032342	0.0258221	0.0193872	0.0135219	0.0085748	0.00487086
River	Yellow	P30	130	3	51	1.1	0.00322694	0	0.00660366	0.0068487	0.00723991	0.00779469	0.00847569	0.00920791	0.00992212	0.0105888	0.0112145	0.0118298	0.0124858	0.0132479	0.0141875	0.0153694	0.0168436	0.0186379	0.0207549	0.0231736	0.0258542	0.0287429	0.0317769	0.0348898	0.0380155	0.0410853	0.0440036	0.0466421	0.0488524	0.0504523	0.0512437	0.0510331	0.0496591	0.0470267	0.043142	0.0381428	0.0323052	0.0259919	0.0196462	0.0136332	0.00835485	0.00445093	0.000628966
River	Yellow	P31	131	1	51	0.1085	0.00614232	0	0.00349059	0.00359752	0.00376652	0.00400579	0.00429585	0.00459942	0.00488531	0.00514652	0.00539768	0.00566734	0.00599399	0.00641936	0.00697962	0.0076955	0.008566	0.00956474	0.0106436	0.0117441	0.0128153	0.0138344	0.0148273	0.0158868	0.0171861	0.0189704	0.0215176	0.0250778	0.0298279	0.0357868	0.0427461	0.0502365	0.0575474	0.0638001	0.0680712	0.0695607	0.0677863	0.0627084	0.0547715	0.0448275	0.0341114	0.0238757	0.0151674
River	Yellow	P31	131	2	51	0.5425	0.0035841	0	0.00463332	0.00476899	0.0050007	0.00534378	0.00577624	0.0062504	0.00672276	0.00717724	0.00762193	0.00807938	0.00858229	0.0091661	0.00986335	0.0106938	0.0116604	0.012747	0.0139228	0.0151529	0.0164148	0.0177154	0.019106	0.0206939	0.0226445	0.0251634	0.0284457	0.0326159	0.037695	0.0435291	0.0497555	0.0558134	0.060999	0.0645528	0.0657753	0.0641643	0.0595591	0.052165	0.0426574	0.0318524	0.0209559	0.0120371	0.00234717
River	Yellow	P31	131	3	51	1.085	0.0023798	0	0.00554669	0.00577512	0.00612425	0.00660915	0.00720049	0.00783802	0.00846532	0.00905647	0.00961283	0.0101531	0.0107106	0.0113264	0.0120441	0.0129002	0.013921	0.0151185	0.0164931	0.0180396	0.0197559	0.0216507	0.0237482	0.0260907	0.0287352	0.031739	0.0351224	0.0388402	0.0427821	0.0467389	0.0504056	0.0534064	0.0553352	0.0558088	0.0545297	0.051355	0.046354	0.0398286	0.0322792	0.0243633	0.0168533	0.0102787	0.00567199
River	Yellow	P32	132	1	51	0.1415	0.011156	0	0.0040906	0.00419616	0.00438244	0.00466118	0.00500898	0.00537888	0.00572896	0.00604453	0.00633504	0.0066252	0.00695122	0.00735705	0.00788838	0.00858808	0.0094937	0.0106352	0.0120368	0.0137196	0.0157055	0.0180194	0.0206886	0.023741	0.0271993	0.0310713	0.0353175	0.0398354	0.044474	0.0490021	0.0531135	0.0564414	0.0585899	0.0591841	0.0579366	0.0547233	0.0496468	0.0430427	0.0354435	0.0274955	0.0199569	0.0134709	0.00848025
River	Yellow	P32	132	2	51	0.7075	0.00638357	0	0.00447911	0.00456046	0.00474394	0.00505119	0.00546346	0.00593233	0.00640936	0.00686977	0.00731054	0.00774355	0.00819511	0.00870406	0.00931935	0.0100958	0.0110924	0.0123694	0.013988	0.0160082	0.0184858	0.0214652	0.0249705	0.0289943	0.0334858	0.0383411	0.0433754	0.0483249	0.052887	0.0567112	0.0594398	0.0607505	0.0603955	0.0582393	0.054291	0.0487285	0.0418922	0.0342399	0.0263127	0.0186568	0.0118764	0.00652669	0.00264894
River	Yellow	P32	132	3	51	1.415	0.00421889	0	0.00544988	0.00556704	0.00580791	0.00619688	0.00670979	0.0072856	0.00786085	0.0083982	0.00888597	0.00933226	0.0097667	0.0102432	0.0108385	0.0116476	0.0127805	0.0143524	0.0164738	0.0192363	0.0226957	0.0268551	0.0316496	0.0369358	0.0424829	0.0479844	0.0530571	0.0572857	0.060294	0.0617618	0.0614821	0.0593889	0.0555573	0.0501909	0.0436072	0.0362239	0.0285185	0.0210109	0.0140858	0.00821402	0.00369057	0.000194538	0
River	Yellow	P33	133	1	51	0.157	0.00668929	0	0.00476116	0.00485458	0.00503251	0.00531327	0.00567812	0.00608217	0.00648283	0.0068611	0.00721706	0.00756078	0.00790977	0.00828757	0.00872104	0.00923914	0.00987567	0.0106731	0.0116906	0.0130124	0.0147501	0.017036	0.0200079	0.0237857	0.028437	0.0339406	0.0401329	0.0466886	0.0531687	0.0590173	0.063633	0.0664609	0.0670743	0.0652426	0.0609781	0.0545517	0.0464573	0.0373341	0.027879	0.0187897	0.010767	0.0042203	0.000394383
River	Yellow	P33	133	2	51	0.785	0.00656643	0	0.0043321	0.00439412	0.0045373	0.00478696	0.00513476	0.00554713	0.00598986	0.0064465	0.00691384	0.00739326	0.00788928	0.00840786	0.00896053	0.00956379	0.0102454	0.0110514	0.0120558	0.0133682	0.0151322	0.0175136	0.0206793	0.0247655	0.0298358	0.0358376	0.0425447	0.0495434	0.0562942	0.0621403	0.0664025	0.0684939	0.0680198	0.0648582	0.059204	0.0515629	0.0426642	0.0333083	0.0242535	0.0160772	0.00924792	0.00412063	0.000482171
River	Yellow	P33	133	3	51	1.57	0.0036359	0	0.0049506	0.00499742	0.00513504	0.0053864	0.00573496	0.0061361	0.00654732	0.00695053	0.00734663	0.00774529	0.0081625	0.00861976	0.00914442	0.00977037	0.0105427	0.0115222	0.0127929	0.014467	0.0166796	0.0195739	0.0232762	0.0278626	0.0333171	0.0394954	0.04608	0.0525874	0.0584479	0.063034	0.0657712	0.0662481	0.0642905	0.0599976	0.0537337	0.046074	0.0377007	0.0292711	0.021371	0.0143948	0.00867978	0.00464272	0.00122262
River	Yellow	P34	134	1	51	0.1325	0.00884804	0	0.00264254	0.00262185	0.00261715	0.00263516	0.00266591	0.00269164	0.00270587	0.00272509	0.00278181	0.00291254	0.0031491	0.00350853	0.00398487	0.00454448	0.00512697	0.00565324	0.00604417	0.00625083	0.0062896	0.00627188	0.00642393	0.00709113	0.00871851	0.0117898	0.0167221	0.0237398	0.032812	0.0435453	0.0551548	0.0665349	0.0764038	0.0834928	0.0867596	0.085598	0.0799915	0.0705264	0.0582795	0.044646	0.0312225	0.0192295	0.0102771
River	Yellow	P34	134	2	51	0.6625	0.00466202	0	0.00426723	0.0043852	0.00457451	0.00484739	0.00518488	0.00554844	0.00590703	0.00625634	0.00661257	0.00700002	0.0074441	0.00796299	0.00856341	0.00923531	0.00995412	0.0106874	0.01141	0.012126	0.0128901	0.0138212	0.015106	0.0169884	0.0197409	0.0236105	0.0287361	0.0350719	0.0423765	0.0501611	0.0577155	0.0641985	0.0687634	0.0706969	0.0695532	0.0652636	0.058176	0.0489879	0.0386278	0.028109	0.0184879	0.0105286	0.00486842
River	Yellow	P34	134	3	51	1.325	0.00320668	0	0.00574912	0.00597143	0.00631086	0.00678125	0.00735143	0.00795978	0.00855045	0.00910064	0.00961581	0.0101177	0.0106393	0.0112182	0.0118911	0.0126857	0.0136208	0.0147074	0.0159571	0.0173932	0.0190606	0.0210284	0.0233864	0.026234	0.0296589	0.0337043	0.0383152	0.0433071	0.0483855	0.0531282	0.0570277	0.0595609	0.0602702	0.0588469	0.0552054	0.0495334	0.0422856	0.0340827	0.025663	0.0176738	0.0107741	0.0057732	0.00126869
River	Yellow	P35	135	1	51	0.375	0.0109569	0	0.00341405	0.00349879	0.00364581	0.00386292	0.00412913	0.0044046	0.00465521	0.00487184	0.00506828	0.00527319	0.0055252	0.00586691	0.00633609	0.00695777	0.00773836	0.00866185	0.00969226	0.0107827	0.011891	0.0129988	0.0141319	0.0153792	0.0169063	0.0189476	0.021765	0.0255885	0.0305735	0.0367162	0.0437877	0.051307	0.0585681	0.064718	0.0688776	0.0703002	0.0685438	0.0635801	0.0558239	0.0460609	0.0354417	0.0251482	0.0161845
River	Yellow	P35	135	2	51	1.875	0.00574591	0	0.00336192	0.00338841	0.00346613	0.00360692	0.00379556	0.00399905	0.00418967	0.00436228	0.00453129	0.00472282	0.00497072	0.00531206	0.00577967	0.00639649	0.0071724	0.00810308	0.00917479	0.0103739	0.0117003	0.0131815	0.0148841	0.0169218	0.0194551	0.0226727	0.026742	0.0317522	0.0376918	0.0443785	0.0514285	0.058268	0.0641871	0.0684306	0.0703147	0.0693601	0.0654167	0.0587114	0.0498357	0.0396431	0.0292403	0.0196768	0.0116494
River	Yellow	P35	135	3	51	3.75	0.00510818	0	0.00471966	0.00483534	0.00503843	0.00534391	0.00572857	0.00614274	0.00654105	0.00690638	0.0072474	0.00758955	0.00797097	0.00843719	0.00903383	0.0098005	0.010768	0.0119564	0.0133783	0.0150447	0.0169735	0.0191964	0.0217616	0.0247325	0.0281788	0.0321573	0.0366662	0.0416115	0.0468116	0.0519568	0.0566203	0.0603	0.0624823	0.0627213	0.0607231	0.0564225	0.0500302	0.0419944	0.0330006	0.023752	0.015098	0.00819693	0.0018284
River	Yellow	P36	136	1	51	0.3825	0.0089098	0	0.0039557	0.00401199	0.00413048	0.00432521	0.00457935	0.00485488	0.00511711	0.00535285	0.00556673	0.00577394	0.00599831	0.00627157	0.00662766	0.0071006	0.00772344	0.00852872	0.00955357	0.0108465	0.0124721	0.0145107	0.017054	0.0201966	0.0240189	0.0285654	0.0337998	0.0395763	0.0456593	0.0516896	0.0572095	0.0617113	0.0646981	0.0657494	0.0645879	0.0611399	0.0555719	0.0482778	0.0398398	0.0309406	0.0223771	0.0148358	0.00874067
River	Yellow	P36	136	2	51	1.9125	0.00586678	0	0.0056135	0.00577927	0.00606566	0.00649099	0.00702621	0.00760814	0.00817522	0.00869614	0.00916784	0.0096074	0.0100506	0.0105503	0.0111696	0.0119752	0.0130316	0.0143954	0.0161115	0.0182107	0.0207084	0.0236022	0.0268701	0.0304684	0.0343283	0.0383528	0.0423942	0.0462554	0.0497204	0.0525448	0.0544834	0.0553143	0.0548603	0.0530108	0.0497437	0.045147	0.0394308	0.0329114	0.0260046	0.0191512	0.0128695	0.00768318	0.00351399
River	Yellow	P36	136	3	51	3.825	0.00448141	0	0.00623305	0.00638585	0.00666927	0.00710289	0.00765553	0.00826073	0.00885633	0.00941433	0.00993581	0.0104395	0.0109588	0.0115402	0.0122392	0.0131171	0.014239	0.0156696	0.0174707	0.019697	0.0223901	0.0255694	0.0292218	0.0332914	0.0376712	0.0422022	0.0466604	0.0507751	0.0542748	0.0568841	0.0583528	0.0584705	0.0570702	0.0540391	0.0493252	0.0429629	0.0351805	0.0260934	0.0167672	0.00691274	0	0	0
River	Yellow	P37	137	1	51	0.095	0.00557654	0	0.00232997	0.00240619	0.00254756	0.00276369	0.00304117	0.00334827	0.0036512	0.0039284	0.00417186	0.00438588	0.00458842	0.00481159	0.0050983	0.00549659	0.00605304	0.00680375	0.00776541	0.00892587	0.0102385	0.0116221	0.012968	0.0141574	0.0150902	0.0157269	0.0161258	0.0164762	0.0171081	0.0184701	0.0210608	0.0253064	0.0314288	0.0393223	0.0484673	0.0579099	0.0663773	0.0725182	0.0751863	0.0736942	0.0680448	0.0589715	0.0477038
River	Yellow	P37	137	2	51	0.475	0.00386765	0	0.00346055	0.00355582	0.0037258	0.00398588	0.00432272	0.00470174	0.00508843	0.00546581	0.0058339	0.00620521	0.00660413	0.00706193	0.00761172	0.00827981	0.00908107	0.010015	0.0110662	0.0122099	0.0134197	0.014678	0.0159873	0.0173825	0.0189417	0.0207888	0.0230746	0.0259528	0.0295664	0.0339959	0.0392085	0.0450075	0.0510108	0.0566618	0.0612779	0.0641402	0.0646325	0.0623771	0.0573357	0.0498432	0.0406844	0.0308778	0.0215077
River	Yellow	P37	137	3	51	0.95	0.00201837	0	0.00480335	0.00490798	0.00511261	0.00543895	0.00587069	0.00636504	0.00688244	0.00740872	0.00795087	0.0085286	0.00917376	0.00992447	0.0108226	0.0119032	0.0131902	0.0146907	0.0163952	0.0182808	0.0203192	0.0224849	0.0247643	0.0271637	0.0297148	0.0324702	0.0354728	0.0387296	0.042204	0.0457726	0.049211	0.0521993	0.0543572	0.0552953	0.0546788	0.0522962	0.0481219	0.0423371	0.0353076	0.0275648	0.0198121	0.0126327	0.00708166
River	Yellow	P38	138	1	51	0.08	0.00488716	0	0.00301245	0.00306558	0.00317337	0.00334796	0.00357715	0.00383134	0.00408222	0.00431753	0.0045402	0.00476462	0.00501702	0.0053338	0.0057554	0.00631855	0.00704959	0.0079576	0.00903044	0.0102348	0.0115235	0.0128458	0.0141625	0.0154634	0.0167869	0.0182333	0.0199594	0.0221646	0.0250762	0.028901	0.0337639	0.0396374	0.0462874	0.0532481	0.0598357	0.065211	0.0685068	0.0689864	0.0662097	0.060161	0.0514029	0.0409394	0.0300643
River	Yellow	P38	138	2	51	0.4	0.00234923	0	0.00483683	0.00497948	0.0052169	0.00556615	0.00600637	0.00649026	0.00697389	0.00743955	0.00789232	0.00835129	0.00884703	0.00941633	0.010098	0.0109262	0.0119282	0.0131239	0.0145291	0.0161615	0.0180467	0.0202196	0.0227232	0.0256032	0.0288978	0.0326228	0.0367376	0.0411291	0.0456276	0.049979	0.0538546	0.0568761	0.0586536	0.0588355	0.057167	0.0535526	0.0481067	0.0411577	0.0332153	0.0249182	0.0170274	0.010139	0.00505224
River	Yellow	P38	138	3	51	0.8	0.00221253	0	0.00525208	0.00541684	0.00570046	0.00612543	0.00667288	0.00729512	0.00794736	0.00861038	0.00928452	0.00997992	0.0107158	0.0115139	0.0123975	0.0133836	0.0144823	0.0156969	0.0170292	0.0184877	0.0200953	0.0218915	0.0239321	0.0262847	0.0290158	0.0321689	0.0357237	0.0395761	0.0435571	0.0474203	0.050862	0.0535461	0.055132	0.0553145	0.0538699	0.0507066	0.0459117	0.0397235	0.0325684	0.0248475	0.0171378	0.0105685	0.00335068
River	Yellow	P39	139	1	51	0.137	0.00618469	0	0.00356601	0.00363397	0.0037551	0.00394209	0.00418201	0.0044461	0.00471256	0.00498256	0.00527464	0.00561321	0.00602147	0.0065117	0.00708081	0.00770533	0.00834419	0.00894718	0.00947255	0.00991267	0.0103208	0.0108311	0.0116672	0.0131364	0.0156013	0.0194171	0.0248309	0.0318788	0.0403551	0.049738	0.0592039	0.067726	0.0742238	0.0777402	0.0776186	0.0736546	0.0661678	0.0559301	0.0440728	0.0318074	0.020443	0.0112794	0.00369242
River	Yellow	P39	139	2	51	0.685	0.00499756	0	0.00389814	0.00399622	0.00415605	0.00438804	0.00467431	0.00497975	0.00527736	0.00556539	0.00586128	0.00619066	0.00658167	0.00705697	0.00762682	0.00828255	0.00899696	0.00972954	0.0104409	0.0111147	0.0117808	0.012531	0.0135281	0.0150041	0.0172431	0.0205362	0.0251041	0.0310162	0.0381645	0.0461959	0.0545068	0.0622982	0.0686725	0.0727556	0.0738377	0.0715187	0.0658214	0.0572001	0.046494	0.0347659	0.0232905	0.0132594	0.00509492
River	Yellow	P39	139	3	51	1.37	0.00299906	0	0.00457105	0.00465544	0.00480868	0.0050493	0.00536497	0.00572365	0.00609991	0.0064923	0.00691565	0.00738908	0.00793152	0.00855445	0.00926051	0.0100393	0.0108717	0.0117386	0.0126355	0.0135921	0.0146874	0.0160552	0.0178802	0.0203803	0.0237706	0.028211	0.0337298	0.0401679	0.0471908	0.0542561	0.0606609	0.0656383	0.0684744	0.0686318	0.0658589	0.0602667	0.0523347	0.0427993	0.0326124	0.022636	0.0137793	0.00726469	0.00101962
River	Yellow	P40	140	1	51	0.13	0.0095329	0	0.00236595	0.00234811	0.00234297	0.00235661	0.00237996	0.0023965	0.0023993	0.00240235	0.00243587	0.00253691	0.00274203	0.00307756	0.00354988	0.00413892	0.0047954	0.00544373	0.00599438	0.00636855	0.0065325	0.00653187	0.00652122	0.00678327	0.00772996	0.00986251	0.0136841	0.0195765	0.0277163	0.0379442	0.0496816	0.0619393	0.0734176	0.0826794	0.0883783	0.0895216	0.0857156	0.0772727	0.0651484	0.0507885	0.0359945	0.0222596	0.0116526
River	Yellow	P40	140	2	51	0.65	0.00307401	0	0.00465016	0.00473422	0.00489645	0.00515833	0.00550868	0.00591458	0.00634801	0.00680419	0.00729477	0.00783654	0.0084479	0.00914111	0.00992177	0.0107834	0.011711	0.0126868	0.0137031	0.0147792	0.0159774	0.0174105	0.0192388	0.0216556	0.0248563	0.0289901	0.0340876	0.040009	0.0464565	0.0529469	0.0588555	0.0635011	0.066242	0.0665739	0.0642182	0.0591933	0.0518353	0.0427446	0.0327097	0.0225901	0.0133221	0.00566293	0.000602543
River	Yellow	P40	140	3	51	1.3	0.00243105	0	0.0049676	0.00505936	0.00525393	0.00557693	0.00601566	0.00653054	0.00708469	0.007665	0.00827547	0.00892599	0.00962993	0.0103977	0.0112388	0.0121565	0.0131513	0.0142263	0.0153978	0.0167086	0.018238	0.020103	0.0224493	0.0254329	0.0291871	0.033777	0.0391328	0.0450114	0.0510236	0.0566219	0.0611648	0.0640189	0.0646643	0.0627871	0.0583509	0.0516361	0.0432075	0.0338583	0.024367	0.0156453	0.0084195	0.00238286	0.0002582
River	Yellow	P41	141	1	51	0.18	0.0120562	0	0.00190192	0.00194064	0.00201164	0.00211766	0.00224427	0.00236518	0.00245707	0.00251191	0.00253753	0.00255477	0.00259523	0.00269838	0.00290105	0.00323062	0.00369692	0.00428562	0.00495537	0.00564124	0.00626776	0.00676857	0.00711227	0.00733255	0.00756051	0.00804396	0.00913928	0.0112704	0.0148769	0.0203245	0.02779	0.0371511	0.0479228	0.059249	0.0699634	0.078727	0.084268	0.0856395	0.0824234	0.0748295	0.0638047	0.0507803	0.0373962
River	Yellow	P41	141	2	51	0.9	0.0119943	0	0.00172721	0.00173533	0.00176238	0.00181057	0.0018677	0.00191269	0.00192957	0.00191849	0.00189512	0.00188623	0.00192558	0.00204869	0.00228201	0.00263655	0.00310137	0.00364022	0.0041936	0.00468874	0.00505913	0.00526958	0.00534449	0.00539636	0.00565064	0.00644911	0.00822032	0.0114125	0.0164283	0.0235178	0.0326648	0.0435032	0.0552945	0.0669674	0.0772264	0.084731	0.0883527	0.087411	0.0818268	0.0721489	0.0596113	0.0457911	0.0323459
River	Yellow	P41	141	3	51	1.8	0.00446282	0	0.00311824	0.00315169	0.00322589	0.00334982	0.00350939	0.00367683	0.00383225	0.00397862	0.0041373	0.00433853	0.00461535	0.00499586	0.00549533	0.00611036	0.00681782	0.00757812	0.00834654	0.00909209	0.00982088	0.0105973	0.0115596	0.0129262	0.0149857	0.0180599	0.0224298	0.0282494	0.0355054	0.0439307	0.0529718	0.0618208	0.0695056	0.0750241	0.0775082	0.0763998	0.0715966	0.0634912	0.0529022	0.0409615	0.0290297	0.0181744	0.00998164
River	Yellow	P42	142	1	51	0.165	0.0110228	0	0.00177923	0.00179959	0.00185241	0.00194142	0.00205319	0.00216212	0.00224495	0.00229302	0.00231308	0.00232445	0.00235693	0.00244891	0.00263856	0.00295793	0.00342509	0.00403663	0.00476285	0.00554815	0.0063208	0.00701018	0.00757069	0.00801134	0.00842914	0.00903262	0.0101391	0.0121418	0.0154634	0.020473	0.0273777	0.0361162	0.0462912	0.0571511	0.0676312	0.076468	0.0824107	0.0844659	0.0821098	0.0754082	0.0651466	0.0526299	0.039413
River	Yellow	P42	142	2	51	0.825	0.00442028	0	0.00324539	0.0033139	0.00344633	0.0036544	0.00392264	0.00421738	0.00450961	0.00479248	0.00507868	0.00539209	0.00576279	0.00621879	0.00677963	0.00744857	0.0082097	0.00902836	0.00985893	0.0106601	0.0114154	0.0121521	0.0129574	0.0139902	0.0154823	0.0177172	0.0209769	0.0254722	0.0313025	0.0383728	0.0463432	0.0546226	0.0624144	0.0688052	0.0728911	0.0739322	0.0715143	0.0656512	0.056807	0.0458501	0.0340419	0.0226132	0.0130823
River	Yellow	P42	142	3	51	1.65	0.0032954	0	0.00384491	0.00392006	0.0040615	0.00428349	0.00457102	0.00488966	0.00520966	0.00552333	0.00584049	0.00617991	0.00656594	0.00702309	0.00757086	0.00821789	0.00896138	0.00978877	0.0106862	0.0116518	0.012711	0.0139274	0.0154084	0.0173048	0.0198007	0.0230865	0.0273043	0.0324943	0.0385815	0.0453175	0.0522675	0.0588343	0.0643156	0.0679899	0.0692256	0.0676052	0.0630352	0.055798	0.0465212	0.0361125	0.0257006	0.0161723	0.00897463
River	Yellow	P43	143	1	51	0.2495	0.00804372	0	0.0022769	0.00230823	0.0023631	0.00244292	0.00253229	0.00260759	0.00265558	0.0026859	0.00272665	0.00281522	0.00299097	0.00328611	0.00371423	0.004263	0.00488989	0.00552361	0.00607439	0.0064561	0.00661842	0.00658003	0.00645954	0.00649873	0.00707089	0.0086519	0.0117469	0.016778	0.0239987	0.0333647	0.0444367	0.056365	0.0679643	0.077864	0.0847185	0.0874606	0.0855471	0.0790727	0.0687667	0.0558465	0.0419702	0.028781	0.0175063
River	Yellow	P43	143	2	51	1.2475	0.00355708	0	0.00417688	0.00426175	0.00441506	0.00465337	0.00496348	0.00531315	0.00567619	0.00604919	0.00644428	0.00687776	0.00736568	0.00791785	0.0085369	0.00921508	0.00993855	0.0106947	0.011486	0.0123478	0.0133628	0.0146672	0.0164471	0.0189217	0.0223107	0.0267826	0.0323795	0.0389583	0.0462012	0.0535802	0.0603986	0.0658832	0.0692976	0.0700632	0.0678685	0.0627536	0.0551356	0.0457235	0.0354587	0.0252477	0.0160437	0.00894326	0.00263573
River	Yellow	P43	143	3	51	2.495	0.00183351	0	0.00484607	0.00495663	0.00516734	0.00550364	0.00595292	0.00647437	0.00702671	0.00758969	0.00816054	0.00874615	0.00936306	0.0100342	0.0107906	0.0116644	0.012691	0.0139101	0.0153716	0.0171395	0.019293	0.021919	0.0250988	0.0288894	0.0332981	0.0382564	0.0435777	0.0489499	0.053982	0.0582068	0.0611457	0.0623794	0.0616089	0.0587063	0.0537518	0.0470531	0.0391263	0.0306236	0.0222393	0.0145893	0.00820194	0.00336419	0.000350485
River	Yellow	P44	144	1	51	0.25	0.00599822	0	0.00294811	0.00294703	0.00297336	0.00303685	0.0031281	0.00322719	0.00332367	0.00342915	0.00357101	0.0037817	0.00409213	0.00452294	0.00507781	0.00573723	0.0064576	0.0071755	0.00782168	0.00834635	0.00875105	0.00911695	0.00962548	0.010566	0.0123232	0.0153257	0.0199522	0.0264184	0.0347186	0.0445209	0.0551273	0.0655213	0.0744915	0.0808108	0.0834497	0.081798	0.0758311	0.0661281	0.0537838	0.0401939	0.0269674	0.0154742	0.00651705
River	Yellow	P44	144	2	51	1.25	0.00262694	0	0.00498729	0.00510776	0.00532466	0.00565898	0.00609437	0.00658901	0.00710563	0.00763282	0.00817861	0.00875826	0.00938957	0.0100848	0.0108507	0.0116844	0.0125773	0.0135211	0.0145203	0.0156079	0.0168592	0.018394	0.0203702	0.0229658	0.0263472	0.0306257	0.0357924	0.0416755	0.0479574	0.0541456	0.0596115	0.0636692	0.0656785	0.0651585	0.0618917	0.0560017	0.047962	0.0385129	0.0285441	0.0189656	0.010658	0.00414855	0.000391305
River	Yellow	P44	144	3	51	2.5	0.00167146	0	0.00555699	0.0056958	0.0059605	0.00637758	0.00692889	0.00756421	0.00823508	0.00892021	0.00961992	0.0103444	0.0111107	0.0119352	0.0128363	0.0138279	0.0149219	0.0161323	0.0174844	0.019025	0.0208274	0.0229867	0.0256082	0.0287885	0.032586	0.0369876	0.0418587	0.0469258	0.0518137	0.0560438	0.0590968	0.0604946	0.0598778	0.0570748	0.0521543	0.0454485	0.0375002	0.029023	0.0206102	0.0130625	0.00694906	0.00154334	0.000261058
River	Yellow	P45	145	1	51	0.12	0.00529155	0	0.00291579	0.0030088	0.00316446	0.00339142	0.0036732	0.00397457	0.00426097	0.00451421	0.00473265	0.00492807	0.00512557	0.00536216	0.00567937	0.00611612	0.00670161	0.00744773	0.00834457	0.00936016	0.0104475	0.0115561	0.0126477	0.0137168	0.0148139	0.0160646	0.0176695	0.0198873	0.0230127	0.0273127	0.0329429	0.0398539	0.0477252	0.0559378	0.0636037	0.0696622	0.0730751	0.073058	0.0692738	0.0619274	0.0518673	0.0403438	0.0287697
River	Yellow	P45	145	2	51	0.6	0.00450964	0	0.00354781	0.00364863	0.00381326	0.00405157	0.00434557	0.0046588	0.00495939	0.00523736	0.00550177	0.00577347	0.00608207	0.00646067	0.00693848	0.00753368	0.00824993	0.00907482	0.00998359	0.0109475	0.0119467	0.0129833	0.0140961	0.0153733	0.0169618	0.0190603	0.0218841	0.0256187	0.0303947	0.0362208	0.042931	0.0501478	0.0572822	0.0635719	0.0681652	0.0702547	0.0692626	0.0649892	0.0576946	0.0480548	0.0371894	0.0263746	0.0165506
River	Yellow	P45	145	3	51	1.2	0.0024487	0	0.00450538	0.00461007	0.00480304	0.00510191	0.00548898	0.00592257	0.00636547	0.00680592	0.00725278	0.00772526	0.00824884	0.00884767	0.00954096	0.0103373	0.0112367	0.0122346	0.0133333	0.0145548	0.0159531	0.0176182	0.0196733	0.0222632	0.0255316	0.0295855	0.0344364	0.0399575	0.0458945	0.0518335	0.0572331	0.0614951	0.06405	0.0644478	0.0624398	0.0580393	0.051534	0.0434204	0.0343998	0.0251293	0.0163794	0.00930681	0.00221343
River	Yellow	P46	146	1	51	0.1	0.00438792	0	0.0032633	0.00336374	0.00352442	0.00375173	0.00402533	0.00430788	0.00456874	0.00480169	0.00502215	0.00525944	0.00555268	0.00594443	0.00647165	0.00715655	0.00800003	0.00897678	0.0100362	0.0111106	0.0121321	0.0130556	0.0138836	0.0146913	0.0156473	0.0170137	0.0191141	0.0222747	0.0267721	0.0327407	0.0400835	0.0484094	0.0570237	0.0649739	0.0711613	0.074522	0.0742704	0.0700967	0.0622686	0.0515911	0.0394138	0.0272487	0.0164108
River	Yellow	P46	146	2	51	0.5	0.00245373	0	0.00454664	0.00468164	0.00491015	0.00525025	0.00568415	0.00616949	0.00666784	0.00716589	0.0076712	0.00820319	0.00879098	0.00946658	0.0102623	0.0112026	0.0123029	0.0135681	0.0149957	0.0165818	0.0183293	0.0202525	0.0223819	0.0247669	0.0274735	0.0305747	0.0341143	0.0380782	0.0423907	0.0468698	0.0512143	0.0550145	0.0577922	0.0590656	0.0584345	0.0556758	0.0508219	0.0441803	0.0362831	0.0278288	0.0196278	0.0122345	0.0068146
River	Yellow	P46	146	3	51	1	0.00202296	0	0.00433312	0.00444859	0.00465023	0.0049564	0.00535274	0.00580306	0.00627568	0.00676123	0.0072666	0.0078063	0.00840172	0.00907551	0.00984895	0.0107338	0.0117305	0.0128281	0.0140098	0.0152651	0.0166027	0.0180606	0.019711	0.0216632	0.0240574	0.0270449	0.0307395	0.0351697	0.0402642	0.0457974	0.0513754	0.0564595	0.0604282	0.0626681	0.0626829	0.0602052	0.0552749	0.0482441	0.0397166	0.0304801	0.0214558	0.0133069	0.00729899
River	Fraser	P1	147	1	60	1.256	0.000951324	0.00640667	0.00542704	0.00538088	0.0057069	0.00720372	0.0113037	0.0158513	0.0198841	0.0221686	0.0264577	0.0339196	0.0452572	0.0580792	0.0654332	0.0611758	0.0582637	0.0474427	0.0409747	0.0348274	0.0373228	0.0448547	0.0612043	0.0648965	0.0562494	0.0405456	0.0312759	0.0227638	0.0171103	0.0138089	0.0135055	0.0119218	0.0133765	0	0	0	0	0	0	0	0	0	0
River	Fraser	P1	147	2	60	2.512	0.000635097	0.0135526	0.0118241	0.0121125	0.0138306	0.0185036	0.0286103	0.0377902	0.0415073	0.0432208	0.0469056	0.0535423	0.0630039	0.0729017	0.0736788	0.061701	0.0542848	0.0411698	0.0332591	0.0298209	0.0356369	0.0496621	0.0705827	0.0547599	0.023379	0.00981716	0.00311995	0.00132584	0.000396765	7.80875e-05	1.55333e-05	4.35808e-06	1.72318e-06	0	0	0	0	0	0	0	0	0	0
River	Fraser	P1	147	3	60	5.024	0.000660521	0.00492289	0.00441202	0.00453251	0.0051126	0.00689849	0.0111998	0.0166771	0.0221964	0.0257292	0.0326891	0.0456582	0.065832	0.0894691	0.100103	0.0901022	0.0816961	0.0622076	0.0505051	0.0394307	0.0382817	0.0419142	0.0488264	0.0407079	0.0258291	0.0156044	0.0108755	0.00756218	0.00444473	0.00274257	0.00231969	0.000898442	0.000618917	0	0	0	0	0	0	0	0	0	0
River	Fraser	P1	147	4	60	7.536	0.000597649	0.00643837	0.0053964	0.00529722	0.00570383	0.00731705	0.0115491	0.0168155	0.0216096	0.0244998	0.0299145	0.039356	0.0542976	0.0716803	0.082265	0.0780643	0.0739314	0.0590427	0.050532	0.0399824	0.0402385	0.0468309	0.0593994	0.0574257	0.043494	0.0284647	0.0176805	0.0123105	0.00602718	0.00242504	0.00102536	0.000529486	0.000455879	0	0	0	0	0	0	0	0	0	0
River	Fraser	P1	147	5	60	10.048	0.000547058	0.00693404	0.00609041	0.00605418	0.00659581	0.00839672	0.0129919	0.01822	0.0225213	0.0250943	0.0302797	0.0394234	0.0534983	0.0699649	0.0798873	0.0750436	0.0729343	0.0600299	0.0524914	0.0436863	0.0442412	0.050248	0.0578816	0.0509571	0.0340133	0.0237931	0.0162479	0.0117596	0.0090783	0.00533444	0.00249306	0.00203885	0.001776	0	0	0	0	0	0	0	0	0	0
River	Fraser	P1	147	6	60	11.304	0.000596922	0.00699547	0.00607959	0.00602072	0.00659287	0.00851612	0.013256	0.018665	0.0230362	0.0256429	0.030697	0.0398944	0.0539389	0.0704728	0.0800595	0.0754273	0.0726174	0.0588454	0.0515131	0.0426419	0.0432388	0.047949	0.0583944	0.0549256	0.0383006	0.0240459	0.0164604	0.0116546	0.00632772	0.00396825	0.00210229	0.000966707	0.000753051	0	0	0	0	0	0	0	0	0	0
River	Fraser	P2	148	1	60	1.304	0.00117048	0.00733228	0.00601292	0.0058677	0.00618688	0.00784994	0.0123033	0.0176715	0.0220754	0.0245337	0.0294067	0.0374251	0.049587	0.0637676	0.0726819	0.0688781	0.0656825	0.0524328	0.0447607	0.0363372	0.0364722	0.0402065	0.0530208	0.054557	0.043972	0.0342434	0.0299276	0.0283571	0.0199999	0.0114978	0.00942343	0.00492536	0.0026037	0	0	0	0	0	0	0	0	0	0
River	Fraser	P2	148	2	60	2.608	0.000744161	0.00689013	0.00582618	0.0057816	0.0061746	0.00789461	0.0126707	0.0179495	0.0222588	0.0248071	0.0297425	0.0387429	0.052147	0.0680191	0.0770101	0.0725456	0.0694101	0.0554	0.0478268	0.0381585	0.0386529	0.0436037	0.0557887	0.0540377	0.0434798	0.0314459	0.0221796	0.0165315	0.0132787	0.0095947	0.00640268	0.00446696	0.00128111	0	0	0	0	0	0	0	0	0	0
River	Fraser	P2	148	3	60	5.216	0.000667728	0.00689107	0.00566827	0.00547303	0.00572178	0.00714936	0.0109529	0.0152572	0.0191371	0.0215773	0.0262479	0.0346173	0.0472084	0.0628877	0.0746791	0.0736623	0.0711139	0.058153	0.05137	0.0415447	0.0420992	0.0465181	0.0568628	0.0561254	0.0409058	0.0273348	0.0194287	0.0177265	0.0151655	0.0127712	0.0103179	0.00969768	0.00573419	0	0	0	0	0	0	0	0	0	0
River	Fraser	P2	148	4	60	7.824	0.000538315	0.00730265	0.00596827	0.00578795	0.00602753	0.00760789	0.0120856	0.0174554	0.0218248	0.0244465	0.0293972	0.0383954	0.0520767	0.0673411	0.0776421	0.0737371	0.0709634	0.057389	0.0501062	0.0401653	0.0392797	0.0427991	0.0524914	0.0524712	0.041619	0.0324865	0.0241426	0.0182247	0.0126354	0.0068914	0.00499782	0.00408642	0.00215456	0	0	0	0	0	0	0	0	0	0
River	Fraser	P2	148	5	60	10.432	0.000609977	0.00755006	0.00632272	0.00616804	0.00651653	0.0082231	0.0126511	0.0179376	0.0217858	0.0240681	0.0286589	0.0368611	0.048944	0.0633027	0.0733363	0.0699045	0.0685101	0.0561094	0.0501894	0.0413582	0.0414326	0.0464426	0.0584518	0.0553949	0.0450968	0.0339416	0.0241531	0.019242	0.0122103	0.00901023	0.00305041	0.00222441	0.000951974	0	0	0	0	0	0	0	0	0	0
River	Fraser	P2	148	6	60	11.736	0.000469719	0.00864252	0.00728385	0.00713288	0.00765913	0.00972288	0.0149839	0.0210949	0.0255338	0.0280432	0.0330777	0.041601	0.0535323	0.067759	0.0750495	0.0700644	0.0671665	0.0550042	0.0483339	0.0395427	0.0412621	0.0454465	0.055625	0.0507729	0.0368955	0.0277022	0.0183818	0.0137657	0.00931954	0.00618157	0.00526928	0.00372552	0.0044242	0	0	0	0	0	0	0	0	0	0
River	Fraser	P3	149	1	60	1.234	0.00053984	0.00856903	0.00722884	0.00701912	0.00747917	0.00947682	0.014744	0.0204393	0.0247093	0.0271862	0.0321537	0.0407234	0.0528618	0.0661736	0.0754787	0.0705476	0.0661718	0.0529228	0.0453176	0.0368537	0.0376476	0.0431141	0.0552442	0.0587744	0.0393978	0.02684	0.0246031	0.0163772	0.00972983	0.00709047	0.00503066	0.00478569	0.00530858	0	0	0	0	0	0	0	0	0	0
River	Fraser	P3	149	2	60	2.468	0.000501132	0.00760601	0.00637541	0.00623484	0.00662716	0.00837691	0.0131157	0.0188001	0.0230984	0.0256615	0.0305817	0.038779	0.0507235	0.0649007	0.0713264	0.0660824	0.0611779	0.0484549	0.0404105	0.0322414	0.032036	0.0357132	0.0492015	0.053253	0.04315	0.0327076	0.0316463	0.0290003	0.0249729	0.0222204	0.0117426	0.00910667	0.00467522	0	0	0	0	0	0	0	0	0	0
River	Fraser	P3	149	3	60	4.936	0.000529326	0.00707377	0.006087	0.00602678	0.00651287	0.00845393	0.0131234	0.018715	0.0236247	0.0265893	0.0324485	0.0427398	0.0579464	0.0754897	0.0828097	0.075323	0.0698578	0.0549498	0.0457675	0.0372688	0.0376291	0.0430447	0.0543165	0.0498715	0.0319822	0.0199414	0.015366	0.0118905	0.00836834	0.0111604	0.0115074	0.00940388	0.00471049	0	0	0	0	0	0	0	0	0	0
River	Fraser	P3	149	4	60	7.404	0.000557747	0.00875376	0.00718137	0.00695312	0.00727287	0.00913695	0.014266	0.0202217	0.0241316	0.02656	0.0312015	0.0394263	0.0514726	0.0655201	0.0750847	0.0698438	0.06625	0.0534803	0.0465636	0.038745	0.03987	0.0469564	0.0567442	0.056476	0.0372793	0.0263813	0.0184861	0.0146982	0.013069	0.0118891	0.00880271	0.00490994	0.00237251	0	0	0	0	0	0	0	0	0	0
River	Fraser	P3	149	5	60	9.872	0.000576262	0.00785162	0.00665584	0.0065237	0.00690418	0.00879137	0.0136931	0.0191137	0.0234203	0.0260691	0.0311791	0.0401915	0.0537595	0.0690132	0.0778906	0.0723268	0.0684355	0.0550273	0.0465182	0.0375355	0.0374306	0.0432428	0.0559763	0.0518008	0.0367717	0.0263045	0.020627	0.0160663	0.0119008	0.0108166	0.00865534	0.00647238	0.00303469	0	0	0	0	0	0	0	0	0	0
River	Fraser	P3	149	6	60	11.106	0.000425268	0.00826384	0.00693248	0.00680321	0.00726829	0.00926661	0.0147982	0.0208159	0.0253088	0.0281277	0.0335705	0.0428573	0.056724	0.0720053	0.0805287	0.07539	0.0709608	0.055877	0.047268	0.0379828	0.0382559	0.0445077	0.0583836	0.0524045	0.0392664	0.0271704	0.0153268	0.0112183	0.00591948	0.00482167	0.00120311	0.000490696	0.000282061	0	0	0	0	0	0	0	0	0	0
River	Fraser	P4	150	1	60	1.301	0.00113483	0.00944771	0.00810221	0.00796345	0.00857218	0.0109137	0.0169395	0.0231249	0.0264696	0.0285081	0.0329252	0.0407754	0.0506505	0.0604309	0.0593367	0.0519272	0.0470128	0.0360763	0.0279286	0.0232703	0.026271	0.0343161	0.0493425	0.0503694	0.0412431	0.0339413	0.0326412	0.0348167	0.0307512	0.0253619	0.0190825	0.0279275	0.0235603	0	0	0	0	0	0	0	0	0	0
River	Fraser	P4	150	2	60	2.602	0.000950511	0.00836168	0.00724	0.00727043	0.00778023	0.00988475	0.0155563	0.0215145	0.0255516	0.0279453	0.0326741	0.0408033	0.0526897	0.0659359	0.0714484	0.0654896	0.0611375	0.0483614	0.0407368	0.0331823	0.0342662	0.0402647	0.0503432	0.050575	0.0361945	0.0256412	0.0190965	0.0240247	0.0208643	0.0201643	0.0146047	0.0125516	0.00784535	0	0	0	0	0	0	0	0	0	0
River	Fraser	P4	150	3	60	5.204	0.000483316	0.00804206	0.0070746	0.00710632	0.00774829	0.0101155	0.0158644	0.0218159	0.0257527	0.0280587	0.0326899	0.0406769	0.0523741	0.0653902	0.0700476	0.0640115	0.0600372	0.048303	0.0399958	0.0338392	0.0358551	0.0416316	0.0549088	0.0524459	0.0352736	0.0256578	0.0203564	0.0211157	0.0197704	0.0232393	0.0155091	0.00805164	0.00724064	0	0	0	0	0	0	0	0	0	0
River	Fraser	P4	150	4	60	7.806	0.000595829	0.00954554	0.00808788	0.00801451	0.00859747	0.010987	0.0169441	0.0236015	0.0284598	0.0314041	0.036994	0.046391	0.0602847	0.0761245	0.0821789	0.0741966	0.06785	0.0524926	0.0430083	0.0345844	0.0346599	0.0395074	0.0511863	0.0460165	0.0294012	0.018276	0.0120615	0.0125819	0.00648982	0.00475988	0.00736669	0.00827681	0.0096694	0	0	0	0	0	0	0	0	0	0
River	Fraser	P4	150	5	60	10.408	0.000545008	0.00881847	0.00760066	0.0075773	0.008253	0.010731	0.0165397	0.0228629	0.0273189	0.0298453	0.034929	0.0438601	0.0569243	0.0710254	0.0753047	0.0676603	0.0621808	0.0488248	0.0406356	0.0348432	0.0361668	0.0435851	0.0594082	0.0571953	0.0336142	0.0211086	0.0137478	0.0144224	0.0107972	0.0103955	0.0122236	0.00841583	0.00318429	0	0	0	0	0	0	0	0	0	0
River	Fraser	P4	150	6	60	11.709	0.000467136	0.00937353	0.00812982	0.00828446	0.00914398	0.0119803	0.0186893	0.0258566	0.0308031	0.0334739	0.0389122	0.0483135	0.0614667	0.0759669	0.0807834	0.0727686	0.0671183	0.0532665	0.0447584	0.0363562	0.0376927	0.0448179	0.0581164	0.0532405	0.0291801	0.0161668	0.0101756	0.00739384	0.00368096	0.00177053	0.00129773	0.00071749	0.000303727	0	0	0	0	0	0	0	0	0	0
River	Fraser	P5	151	6	60	11.25	0.000321736	0.0135472	0.0107035	0.0101063	0.010273	0.0129329	0.0207005	0.0304186	0.0368489	0.0406112	0.0475063	0.0589507	0.0747637	0.090653	0.0887337	0.0780011	0.0695809	0.0532724	0.042013	0.0328887	0.031918	0.0343035	0.039163	0.0322012	0.0196144	0.0101527	0.00556006	0.00382604	0.00194471	0.00143788	0.000706133	-0.000424169	-0.00290919	0	0	0	0	0	0	0	0	0	0
River	Fraser	P5	151	5	60	10	0.000326112	0.0136608	0.0106365	0.00997624	0.0100714	0.0125928	0.0201738	0.0286287	0.0344319	0.0381933	0.044868	0.0551585	0.0695709	0.0842597	0.0822657	0.0704434	0.0636499	0.0487397	0.0393991	0.0294834	0.0293303	0.033546	0.0452412	0.0452101	0.0313403	0.0203576	0.0107852	0.011679	0.00535877	0.00353223	0.00105283	-0.000596319	-0.00304091	0	0	0	0	0	0	0	0	0	0
River	Fraser	P5	151	4	60	7.5	0.000332352	0.0117129	0.0092016	0.00861565	0.00894198	0.0111768	0.0180644	0.0256791	0.0313824	0.035072	0.042131	0.053358	0.068894	0.086197	0.089576	0.0803355	0.0724518	0.0549973	0.045046	0.0351807	0.0331111	0.0351348	0.0438208	0.0388691	0.0303185	0.0161298	0.00735235	0.00570648	0.00245182	0.00178355	0.000554816	-0.00048107	-0.00276594	0	0	0	0	0	0	0	0	0	0
River	Fraser	P5	151	3	60	5	0.000345747	0.00896176	0.00746272	0.00729973	0.00744255	0.00926921	0.0152846	0.0222999	0.0273735	0.0302266	0.0359522	0.0463776	0.061921	0.0788492	0.0879779	0.0818189	0.078011	0.0620312	0.0531688	0.0408034	0.0389096	0.0382231	0.0421649	0.0323181	0.0209511	0.0157074	0.00991672	0.00609396	0.00416514	0.00277566	0.00646532	0.0152293	0.00454795	0	0	0	0	0	0	0	0	0	0
River	Fraser	P5	151	2	60	2.5	0.00037062	0.0123636	0.00970487	0.00944019	0.00981842	0.0125803	0.0203924	0.0294056	0.0354949	0.0390026	0.0453607	0.0552527	0.0681405	0.0809867	0.0797753	0.070021	0.0639192	0.0513511	0.0420968	0.0338512	0.0339113	0.0365764	0.0471787	0.0439267	0.0272903	0.0156213	0.00989698	0.00859112	0.00404058	0.00217114	0.000687046	0.000567678	0.000582889	0	0	0	0	0	0	0	0	0	0
River	Fraser	P5	151	1	60	1.25	0.000381249	0.00880402	0.00748182	0.00739691	0.00805194	0.0105891	0.0167312	0.0232674	0.0292315	0.0326915	0.0393871	0.0506562	0.0666248	0.0850621	0.0910956	0.0821527	0.0759617	0.0593515	0.0493431	0.037578	0.0353622	0.0371585	0.0417244	0.0381341	0.0233754	0.0140657	0.0112168	0.0100415	0.0043063	0.00197237	0.000616046	0.00035142	0.000217154	0	0	0	0	0	0	0	0	0	0
River	Fraser	P6	152	6	60	12.24	0.000369686	0.0101917	0.00841292	0.00809564	0.00845178	0.0108157	0.0172962	0.0252737	0.0307686	0.0344267	0.0413763	0.0528009	0.0695538	0.0886653	0.0921937	0.0827968	0.074559	0.0562202	0.0443134	0.0342666	0.032784	0.0355762	0.0433568	0.040392	0.0268632	0.0148693	0.00678949	0.00607752	0.00241452	0.00171798	0.00133284	0.000414045	-0.00306706	0	0	0	0	0	0	0	0	0	0
River	Fraser	P6	152	5	60	10.88	0.00037682	0.0107495	0.00870242	0.00837055	0.00872319	0.0111096	0.0177522	0.0254977	0.0314242	0.0352634	0.0421756	0.0545514	0.0713072	0.0890901	0.0936256	0.0835605	0.0758793	0.0574475	0.0467955	0.0362094	0.0338118	0.03381	0.040058	0.0338457	0.0230979	0.0127225	0.00829761	0.00388961	0.0013711	0.000886999	0.000399297	-0.000665989	0.000240456	0	0	0	0	0	0	0	0	0	0
River	Fraser	P6	152	4	60	8.16	0.00041612	0.0106649	0.00843904	0.0080273	0.00827757	0.0104314	0.0168677	0.0244603	0.0303042	0.0338529	0.0407079	0.0518511	0.0682823	0.0863559	0.0919852	0.0825113	0.0759846	0.0597151	0.0490599	0.0361148	0.0340003	0.0352396	0.0432151	0.0394327	0.0251475	0.0136512	0.00827583	0.0055633	0.00251148	0.00145188	0.000872328	-0.000395726	-0.00285887	0	0	0	0	0	0	0	0	0	0
River	Fraser	P6	152	3	60	5.44	0.000450285	0.00936129	0.0075937	0.00737413	0.00783014	0.0100359	0.0160836	0.0228571	0.0283115	0.0315461	0.0380985	0.0495379	0.066215	0.0845039	0.09137	0.0831153	0.0784485	0.0605402	0.0490866	0.0372709	0.0362872	0.0369482	0.0433811	0.0390349	0.0262755	0.0172804	0.0111447	0.00709486	0.0039553	0.00206233	0.000999664	-0.000544533	-0.00309985	0	0	0	0	0	0	0	0	0	0
River	Fraser	P6	152	2	60	2.72	0.000539766	0.0111281	0.00867964	0.00828007	0.00850377	0.0106488	0.0171605	0.0248919	0.0309408	0.034444	0.0408795	0.0513918	0.0665013	0.081746	0.0833811	0.075733	0.0690975	0.0543046	0.0442102	0.0354838	0.0360314	0.0385308	0.0510009	0.0467187	0.0281073	0.017541	0.0118775	0.00802442	0.00420214	0.00261563	0.00114334	-0.000326631	-0.00287307	0	0	0	0	0	0	0	0	0	0
River	Fraser	P6	152	1	60	1.36	0.000657334	0.00850471	0.00737494	0.00730885	0.00795736	0.0105861	0.0168953	0.0241388	0.0296896	0.032739	0.0392264	0.0501448	0.0656116	0.0809835	0.0844993	0.0756247	0.0689658	0.052642	0.043689	0.0349777	0.0344387	0.0379906	0.0485667	0.0442143	0.0313125	0.0237477	0.0150425	0.0101601	0.00491158	0.0031978	0.00411412	0.00238444	-0.00164054	0	0	0	0	0	0	0	0	0	0
River	Fraser	P7	153	6	60	11.7	0.000390201	0.0107278	0.00882834	0.00867699	0.00939705	0.0124938	0.02069	0.0301579	0.0368633	0.0404952	0.0477849	0.0603507	0.0765047	0.0932452	0.0916054	0.0804163	0.0717352	0.0531482	0.0428945	0.0322882	0.0306395	0.0315777	0.0368543	0.0304332	0.0209866	0.0119826	0.00715851	0.00379911	0.00139869	0.000818738	0.000397326	-0.001621	-0.00272895	0	0	0	0	0	0	0	0	0	0
River	Fraser	P7	153	5	60	10.4	0.000380239	0.0107285	0.00883348	0.00841019	0.00876312	0.0111295	0.017287	0.0247478	0.0302668	0.0334611	0.0399577	0.0506347	0.065838	0.0821668	0.0884667	0.0815586	0.0773875	0.0617339	0.053364	0.0422753	0.0397916	0.0402898	0.044669	0.0381361	0.020337	0.0103451	0.00658455	0.00514584	0.00290954	0.00162482	0.000518944	-0.00626647	-0.00109626	0	0	0	0	0	0	0	0	0	0
River	Fraser	P7	153	4	60	7.8	0.000400836	0.0108794	0.00871409	0.00840128	0.00879056	0.0111954	0.0181293	0.0264398	0.0330871	0.0375312	0.0448862	0.0576994	0.0744683	0.0914896	0.0935616	0.0818939	0.0746923	0.0569439	0.0462261	0.0354685	0.0333143	0.0360081	0.0415158	0.034012	0.0178854	0.0106421	0.0061314	0.00537237	0.00345134	0.00268639	0.00133324	-0.0113479	-0.00150234	0	0	0	0	0	0	0	0	0	0
River	Fraser	P7	153	3	60	5.2	0.000442544	0.00882663	0.00750091	0.0073995	0.00796142	0.0103383	0.0165415	0.0232831	0.0286709	0.0319247	0.038323	0.0494791	0.0660767	0.083419	0.0866171	0.0789021	0.0727774	0.05661	0.046492	0.0350002	0.0337746	0.0370864	0.0439085	0.0431627	0.0337518	0.0244312	0.0165776	0.00992964	0.00505455	0.00204074	0.000853576	-0.00535474	-0.0013601	0	0	0	0	0	0	0	0	0	0
River	Fraser	P7	153	2	60	2.6	0.000414791	0.0107621	0.00815134	0.00745181	0.00731268	0.00898788	0.0143835	0.0216004	0.0281064	0.0322551	0.0400392	0.0543949	0.0749282	0.0989582	0.104524	0.0935375	0.0863803	0.0660994	0.0518839	0.0380286	0.0335821	0.0340986	0.0379506	0.0304016	0.015904	0.00775847	0.00469324	0.00329319	0.00111491	0.000476777	0.000153503	-0.0169895	-0.000222833	0	0	0	0	0	0	0	0	0	0
River	Fraser	P7	153	1	60	1.3	0.000507741	0.00751291	0.00629705	0.00621634	0.00672234	0.00864301	0.0137246	0.0196637	0.0250097	0.0283161	0.0346108	0.0450117	0.0602738	0.0776316	0.0850037	0.0788936	0.0751128	0.0597757	0.0517134	0.0412933	0.0405379	0.0434089	0.0497396	0.0445259	0.0311437	0.0210426	0.0142204	0.00991078	0.00819615	0.0070151	0.00299231	-0.000472654	-0.00368668	0	0	0	0	0	0	0	0	0	0
River	Fraser	P8	154	6	60	13.05	0.000415593	0.00912974	0.00756228	0.00749416	0.0080785	0.0106235	0.0172481	0.025171	0.0313435	0.0353396	0.0428419	0.0555805	0.0744045	0.0941668	0.0982802	0.087335	0.079406	0.0587527	0.0456254	0.033015	0.0299027	0.0302781	0.0379537	0.0311513	0.0196316	0.0122384	0.00881724	0.00956693	0.00584176	0.00381447	0.00168804	-0.00191799	-0.0103646	0	0	0	0	0	0	0	0	0	0
River	Fraser	P8	154	5	60	11.6	0.000436791	0.0145693	0.0108547	0.00994252	0.00983225	0.0121804	0.0197284	0.0283334	0.0338625	0.0371777	0.0429235	0.0524891	0.064986	0.077785	0.0780975	0.0694284	0.0626891	0.0487962	0.0406053	0.0325464	0.0328601	0.0368756	0.048151	0.045	0.032318	0.0215178	0.0165312	0.0128524	0.00604253	0.00330726	0.00132774	8.37715e-05	-0.00369508	0	0	0	0	0	0	0	0	0	0
River	Fraser	P8	154	4	60	8.7	0.000475887	0.0106748	0.00867343	0.00827537	0.00867429	0.0110192	0.0177981	0.0254997	0.0313518	0.0349321	0.0414167	0.0520943	0.0668239	0.0826793	0.0848523	0.0755029	0.0688043	0.0531258	0.0426303	0.032195	0.0325866	0.0342742	0.0447064	0.0423316	0.0326191	0.0226542	0.0171293	0.0113471	0.00610732	0.00236657	0.000991395	-0.000530631	-0.00360695	0	0	0	0	0	0	0	0	0	0
River	Fraser	P8	154	3	60	5.8	0.000435193	0.00745807	0.00632647	0.00631644	0.00707133	0.00927753	0.0149247	0.0216252	0.0272723	0.0308559	0.0372682	0.0487692	0.0658674	0.0853867	0.0920582	0.085812	0.0804278	0.061697	0.0504468	0.0369891	0.0355822	0.0339797	0.0415083	0.0391783	0.0307029	0.0200957	0.0109232	0.00638006	0.00348634	0.0023059	0.00131511	0.000861252	-0.00216925	0	0	0	0	0	0	0	0	0	0
River	Fraser	P8	154	2	60	2.9	0.000897895	0.00866328	0.00720038	0.00707367	0.00747403	0.0095435	0.015048	0.021586	0.0265349	0.0296738	0.0355429	0.0461553	0.0610414	0.0775467	0.0829161	0.0757162	0.0703857	0.054674	0.0449578	0.0333062	0.0318621	0.0331847	0.0424769	0.0416601	0.0296167	0.0244359	0.019377	0.0162982	0.0137854	0.012296	0.0100255	0.00646143	0.00348023	0	0	0	0	0	0	0	0	0	0
River	Fraser	P8	154	1	60	1.45	0.00144817	0.00834057	0.00661273	0.00628083	0.00643763	0.00815434	0.013042	0.0187084	0.0229475	0.025592	0.030451	0.0381099	0.049085	0.0611382	0.0646441	0.0591645	0.0544045	0.0432726	0.035622	0.0256798	0.0246583	0.0263822	0.0354453	0.038435	0.0345462	0.0259847	0.0214088	0.0295605	0.0311033	0.0262467	0.0291038	0.0663748	0.033063	0	0	0	0	0	0	0	0	0	0
River	Fraser	P9	155	6	60	12.24	0.000428402	0.0126558	0.0100596	0.00948395	0.00973125	0.012109	0.0194822	0.0277034	0.0330962	0.0365006	0.042966	0.0537093	0.0686085	0.0847111	0.087891	0.0797199	0.07375	0.0577687	0.0486417	0.0380127	0.0364967	0.0348327	0.0376834	0.0317985	0.0216845	0.011548	0.00720222	0.00558654	0.00381407	0.00209781	0.0018476	0.00023244	-0.0014254	0	0	0	0	0	0	0	0	0	0
River	Fraser	P9	155	5	60	10.88	0.000485593	0.00924868	0.00779148	0.00766225	0.00827134	0.0107084	0.0170704	0.0241149	0.0298021	0.033017	0.039434	0.0504333	0.0661382	0.0832612	0.0871338	0.080162	0.0728681	0.0555179	0.0457833	0.0355434	0.0347349	0.0351896	0.0456573	0.0427712	0.030789	0.0201447	0.012251	0.00989135	0.00402574	-0.00140558	0.000945962	0.000601781	0.000441534	0	0	0	0	0	0	0	0	0	0
River	Fraser	P9	155	4	60	8.16	0.000544098	0.00658293	0.00597773	0.00608584	0.00695781	0.00928436	0.0148223	0.0209888	0.0262684	0.0292261	0.0355078	0.0466028	0.0630341	0.0824544	0.0912941	0.0850778	0.080821	0.0633579	0.0523226	0.0395498	0.0367854	0.0383508	0.043463	0.0398723	0.0272794	0.0172051	0.0116938	0.00880456	0.00613165	0.00396978	0.00224265	0.000710177	-0.00272495	0	0	0	0	0	0	0	0	0	0
River	Fraser	P9	155	3	60	5.44	0.000602912	0.00974371	0.0078015	0.00735637	0.00750771	0.00936834	0.0152891	0.0225965	0.02787	0.030785	0.0364529	0.0460759	0.0599127	0.0749673	0.0782502	0.071121	0.0675036	0.0536337	0.0454608	0.0356468	0.0343695	0.0357261	0.0470414	0.0475258	0.0338283	0.0264447	0.0225087	0.0186014	0.0119584	0.00864924	0.00637331	-0.00217318	0.00180297	0	0	0	0	0	0	0	0	0	0
River	Fraser	P9	155	2	60	2.72	0.000772988	0.00801211	0.00697953	0.00695031	0.00764017	0.0099671	0.0156443	0.0218968	0.0266546	0.0295192	0.0350202	0.045114	0.0583597	0.0735649	0.0764281	0.0690728	0.0641265	0.0508156	0.0430187	0.0345249	0.0341718	0.0374793	0.0466377	0.0425689	0.0315504	0.0242757	0.0200457	0.0208185	0.0170312	0.0121825	0.0139051	0.010942	0.00508172	0	0	0	0	0	0	0	0	0	0
River	Fraser	P9	155	1	60	1.36	0.000635622	0.00766128	0.00660881	0.00634061	0.00666697	0.00832178	0.0127437	0.0178967	0.02226	0.0246401	0.029128	0.0368348	0.0478049	0.0592074	0.0610607	0.055085	0.0508126	0.0398117	0.0333611	0.0263068	0.0257547	0.0269049	0.0328431	0.0371456	0.0338358	0.0288974	0.0294257	0.0407511	0.0525086	0.0486594	0.0361575	0.0379815	0.0165819	0	0	0	0	0	0	0	0	0	0
River	Fraser	P10	156	6	60	11.7	0.000368285	0.0115907	0.00978738	0.00967772	0.0102632	0.0132718	0.0209693	0.0296	0.0350894	0.0378278	0.0428359	0.0504706	0.0614504	0.0734909	0.0768819	0.0745457	0.0717268	0.0625425	0.0573648	0.0475758	0.0409955	0.0376222	0.0338584	0.0285153	0.0192927	0.011697	0.0110493	0.00515034	0.00383702	0.00366669	0.00313022	0.00335839	0.000864261	0	0	0	0	0	0	0	0	0	0
River	Fraser	P10	156	5	60	10.4	0.000413922	0.00794805	0.00721638	0.00750195	0.00882266	0.0123719	0.0198975	0.0274643	0.032798	0.0357008	0.0412663	0.0507986	0.063462	0.0776432	0.0791327	0.0773461	0.0731586	0.0634304	0.0567163	0.0475052	0.0411311	0.0356751	0.0289556	0.0238199	0.01897	0.0155549	0.013255	0.01208	0.00558692	0.00405797	0.00494636	0.003845	0.00194111	0	0	0	0	0	0	0	0	0	0
River	Fraser	P10	156	4	60	7.8	0.000414103	0.0091666	0.00815866	0.00829991	0.0093011	0.0125625	0.0204838	0.0289499	0.0340971	0.0369574	0.0423949	0.0510156	0.063751	0.0776121	0.0781764	0.0758282	0.0719208	0.0634602	0.0575423	0.0483964	0.0408024	0.0379715	0.0312392	0.023457	0.0185265	0.0157329	0.0118859	0.0101709	0.00763078	0.00407276	0.00152448	0.00061281	-0.00170181	0	0	0	0	0	0	0	0	0	0
River	Fraser	P10	156	3	60	5.2	0.000438181	0.00739429	0.0068856	0.00738038	0.00909785	0.0130876	0.0213757	0.02966	0.0349489	0.0374512	0.0426785	0.0515229	0.0641177	0.0758352	0.07626	0.0727957	0.0680018	0.0588246	0.0526474	0.0458665	0.0415563	0.0365281	0.0332804	0.0294032	0.0230829	0.0160968	0.0126961	0.0108692	0.00749468	0.00483382	0.00497719	0.00383856	-0.00048906	0	0	0	0	0	0	0	0	0	0
River	Fraser	P10	156	2	60	2.6	0.000686859	0.00697843	0.00667036	0.00718279	0.00870953	0.0125297	0.0208699	0.0294466	0.034564	0.0370218	0.0417737	0.0497408	0.0603291	0.070489	0.0683083	0.0655624	0.0617753	0.0540391	0.048378	0.0411391	0.0381273	0.0352087	0.0309995	0.0283322	0.0251528	0.0201169	0.0176249	0.020492	0.0191648	0.0197197	0.00898111	0.00645356	0.00411861	0	0	0	0	0	0	0	0	0	0
River	Fraser	P10	156	1	60	1.3	0.000719289	0.0101845	0.00872477	0.0088027	0.00966397	0.0128515	0.0210333	0.0299836	0.0350519	0.0374724	0.0420859	0.0493313	0.0596178	0.0708159	0.0684991	0.0655878	0.0612746	0.0523876	0.0463134	0.040848	0.0392982	0.0390159	0.037934	0.0341925	0.0280053	0.022604	0.0177863	0.0145662	0.0107355	0.00829793	0.00688051	0.00625818	0.00389519	0	0	0	0	0	0	0	0	0	0
River	Fraser	P11	157	6	60	10.89	0.000366	0.0107199	0.0091072	0.00888682	0.00959461	0.0124892	0.0198968	0.0284216	0.0333493	0.0359934	0.0407442	0.0485129	0.0591181	0.0710009	0.076083	0.0751674	0.0734456	0.0621951	0.0545738	0.0424785	0.0392944	0.0391154	0.0397098	0.03601	0.0275299	0.0208528	0.0129449	0.00776388	0.00309799	0.00116074	0.000426315	0.000200855	0.000114636	0	0	0	0	0	0	0	0	0	0
River	Fraser	P11	157	5	60	9.68	0.000343898	0.0105076	0.00945751	0.00974772	0.0111334	0.0150976	0.0242284	0.0342155	0.0401701	0.0430962	0.0487284	0.0571575	0.0676889	0.0770574	0.0718963	0.0672513	0.0622641	0.0537876	0.0487829	0.0412286	0.0373959	0.0333631	0.0290891	0.0220933	0.0177046	0.0144142	0.0132555	0.011749	0.00939612	0.00767585	0.00456548	0.00490504	0.000895691	0	0	0	0	0	0	0	0	0	0
River	Fraser	P11	157	4	60	7.26	0.000374634	0.00940209	0.00941186	0.0101332	0.0122638	0.0171768	0.0279385	0.038107	0.0430544	0.0452662	0.0498708	0.0571239	0.0667116	0.0753378	0.0697414	0.0648234	0.0604343	0.0530706	0.0480196	0.043368	0.0406726	0.0379005	0.0333194	0.0277302	0.0230565	0.0159186	0.00934322	0.00597003	0.00219986	0.00114397	0.00102231	0.000337873	0.000129796	0	0	0	0	0	0	0	0	0	0
River	Fraser	P11	157	3	60	4.84	0.000372044	0.0102983	0.00951533	0.00999393	0.0116365	0.0158795	0.025153	0.0345719	0.0399516	0.0425947	0.0477243	0.0560272	0.0667133	0.0770298	0.0740356	0.0702563	0.0656886	0.0563914	0.0499061	0.0442185	0.039386	0.03378	0.0308614	0.0270598	0.0229552	0.0158739	0.00952889	0.00792089	0.00374293	0.000990424	0.000261564	3.14428e-05	2.18224e-05	0	0	0	0	0	0	0	0	0	0
River	Fraser	P11	157	2	60	2.42	0.00038801	0.00900819	0.00810359	0.00834325	0.00957106	0.0127643	0.020087	0.0277247	0.0329275	0.0355428	0.0407668	0.0493677	0.0606352	0.0723383	0.074161	0.0725669	0.0690317	0.061284	0.0562884	0.0498494	0.043106	0.0388764	0.0356954	0.0285377	0.0252133	0.0208379	0.0160805	0.00942714	0.00370844	0.00258434	0.00374032	0.00134404	0.000486715	0	0	0	0	0	0	0	0	0	0
River	Fraser	P11	157	1	60	1.21	0.000389635	0.00701029	0.00689459	0.00762043	0.0091797	0.0130644	0.0205662	0.0279381	0.0331929	0.0359438	0.0408284	0.048874	0.0591657	0.0695146	0.0715666	0.0706525	0.0675778	0.0591979	0.0545157	0.0463481	0.0421814	0.0381193	0.0380347	0.0301827	0.0232628	0.0190927	0.0190352	0.0159088	0.0112244	0.00645127	0.00362557	0.00220368	0.00102593	0	0	0	0	0	0	0	0	0	0
River	Fraser	P12	158	6	60	10.89	0.000344132	0.00781514	0.00736397	0.00785662	0.00932473	0.0130674	0.0204806	0.0288302	0.0341775	0.0370476	0.043385	0.053823	0.0685796	0.0839922	0.085815	0.0828957	0.0768576	0.0644228	0.0563164	0.0442189	0.0368267	0.0318601	0.0287034	0.0222776	0.0163347	0.0113302	0.0094208	0.00690356	0.0048492	0.00270216	0.00147638	0.000903076	0.000142238	0	0	0	0	0	0	0	0	0	0
River	Fraser	P12	158	5	60	9.68	0.000344132	0.00853607	0.00787419	0.00794763	0.00850535	0.010976	0.0172231	0.0240728	0.0290835	0.032343	0.0376793	0.0475055	0.0623933	0.0788833	0.0849556	0.0832628	0.0801877	0.0701276	0.0642501	0.0522076	0.0448313	0.0389586	0.033735	0.0254522	0.0201456	0.0136395	0.00875776	0.00489317	0.00196448	0.000527273	-0.00123049	0.000179604	0.000131571	0	0	0	0	0	0	0	0	0	0
River	Fraser	P12	158	4	60	7.26	0.000376183	0.00532765	0.00533437	0.00557931	0.00682563	0.00956246	0.015187	0.0210907	0.0257783	0.0282361	0.033369	0.0428416	0.0569198	0.0721315	0.0788806	0.0789602	0.0757692	0.0664499	0.0627734	0.0528745	0.0469857	0.0420593	0.0366836	0.0307726	0.0226839	0.0198905	0.0166317	0.0128335	0.0100335	0.00836277	0.00558812	0.00278098	0.000802678	0	0	0	0	0	0	0	0	0	0
River	Fraser	P12	158	3	60	4.84	0.00042963	0.00573984	0.00538629	0.00560664	0.00639957	0.00851816	0.012922	0.0176058	0.0216674	0.0239293	0.0288456	0.0379865	0.0518392	0.0677996	0.0798621	0.0813655	0.0823695	0.0741565	0.0690527	0.0590365	0.0523281	0.0477707	0.0414761	0.0318866	0.0233988	0.018753	0.0140162	0.011014	0.00702766	0.00633554	0.00413782	0.00116527	0.000601465	0	0	0	0	0	0	0	0	0	0
River	Fraser	P12	158	2	60	2.42	0.000469762	0.00857058	0.0064851	0.00623818	0.00700602	0.00911242	0.0143906	0.0199161	0.0238053	0.0261167	0.0305402	0.0378666	0.0490938	0.0615498	0.0687481	0.0685268	0.0663758	0.0594216	0.0562946	0.0493577	0.0431447	0.0384773	0.0350727	0.0304433	0.0267336	0.0222247	0.0212166	0.0242768	0.0208647	0.0316725	0.0221119	0.0098051	0.00453995	0	0	0	0	0	0	0	0	0	0
River	Fraser	P12	158	1	60	1.21	0.000585103	0.00495615	0.00472181	0.00505266	0.00612919	0.00848904	0.0134712	0.0185636	0.0224288	0.0245971	0.029159	0.0376863	0.050632	0.0649203	0.0737041	0.0749693	0.0753775	0.0683413	0.0659338	0.0540498	0.0467972	0.0433259	0.0380715	0.0335608	0.0282779	0.0254693	0.0228216	0.0179954	0.00955401	0.0100099	0.00861435	0.00793245	0.00438684	0	0	0	0	0	0	0	0	0	0
River	Fraser	P13	159	6	60	11.07	0.000395394	0.00556136	0.00534221	0.00570448	0.00655896	0.00863568	0.0132027	0.0185915	0.0229689	0.025029	0.0295288	0.0379336	0.0507365	0.0655033	0.0754157	0.0775184	0.0790508	0.0742772	0.0734134	0.0612344	0.0549243	0.0498213	0.0411051	0.0309803	0.0237596	0.0192813	0.0140566	0.010632	0.00826156	0.00487726	0.00479106	0.000825649	0.000477179	0	0	0	0	0	0	0	0	0	0
River	Fraser	P13	159	5	60	9.84	0.000401008	0.00700492	0.00647532	0.00679443	0.0077866	0.0102456	0.0155703	0.0212516	0.025655	0.0280488	0.0327142	0.0411947	0.0534979	0.0674005	0.075795	0.0770729	0.0785794	0.0730062	0.0736784	0.0620591	0.0546134	0.0490581	0.0393369	0.0304411	0.0225149	0.0159087	0.00996098	0.00618301	0.00366297	0.0019142	0.00113141	0.000829723	0.000613772	0	0	0	0	0	0	0	0	0	0
River	Fraser	P13	159	4	60	7.38	0.000432326	0.00624419	0.00587507	0.00616568	0.0071059	0.00949377	0.0146046	0.0196488	0.02385	0.026133	0.0303465	0.0385421	0.0508444	0.0642089	0.072454	0.0746385	0.0748954	0.0693782	0.0682348	0.0593917	0.0560094	0.0516927	0.0450387	0.0375195	0.0278928	0.0201463	0.0147099	0.00993465	0.00589204	0.00513248	0.00433727	2.74911e-05	-0.000388696	0	0	0	0	0	0	0	0	0	0
River	Fraser	P13	159	3	60	4.92	0.000473608	0.00539006	0.00534999	0.00576652	0.00687242	0.00958081	0.0148061	0.0200161	0.024033	0.0262488	0.0309171	0.0394661	0.0525249	0.0673313	0.0761816	0.0768382	0.0773771	0.0697803	0.0666786	0.0553494	0.0495255	0.0454229	0.0418697	0.0368613	0.0290938	0.0234569	0.0183989	0.0104112	0.00592914	0.00416289	0.00209101	0.00135936	0.000909129	0	0	0	0	0	0	0	0	0	0
River	Fraser	P13	159	2	60	2.46	0.000697818	0.00446731	0.00426462	0.00457023	0.00552777	0.00765995	0.0117544	0.0161403	0.0198303	0.0218592	0.0259522	0.033418	0.0445304	0.0570839	0.0645476	0.0653588	0.0649128	0.057625	0.0553554	0.0469361	0.0451078	0.0443099	0.0426079	0.0416709	0.039276	0.0382267	0.0355158	0.0328172	0.0280398	0.0217384	0.013611	0.00440928	0.000875142	0	0	0	0	0	0	0	0	0	0
River	Fraser	P13	159	1	60	1.23	0.000619353	0.00492735	0.00489632	0.00531797	0.00641314	0.00910587	0.0144307	0.0202129	0.0255762	0.0288154	0.0350331	0.0467712	0.0653769	0.0879106	0.0962864	0.0925226	0.0849828	0.0682141	0.0573581	0.0447371	0.0381639	0.0330409	0.0283227	0.0242251	0.020596	0.0174575	0.0127033	0.00987376	0.00648185	0.00548874	0.00253899	0.00131519	0.000903336	0	0	0	0	0	0	0	0	0	0
River	Fraser	P14	160	6	60	11.97	0.000337826	0.00514021	0.00502692	0.00551173	0.0066827	0.00921797	0.0144417	0.0199714	0.0244865	0.0265372	0.0312148	0.0400011	0.0530662	0.0676428	0.0764922	0.0783319	0.0787208	0.0719145	0.0710995	0.0621011	0.0580733	0.0530997	0.0457505	0.035678	0.0246114	0.016795	0.00887265	0.00528414	0.00226119	0.0011747	0.00047123	0.000210191	0.000117013	0	0	0	0	0	0	0	0	0	0
River	Fraser	P14	160	5	60	10.64	0.000406818	0.00441454	0.00439049	0.00495435	0.0064249	0.00950774	0.0151076	0.0204182	0.0245965	0.0265821	0.0307967	0.0391557	0.0511299	0.064125	0.0718281	0.0713392	0.070305	0.0632437	0.0609188	0.0522476	0.0491489	0.0461196	0.0425646	0.03647	0.0328512	0.0278432	0.0231168	0.0195709	0.0136052	0.00883493	0.00416803	0.00308412	0.00113646	0	0	0	0	0	0	0	0	0	0
River	Fraser	P14	160	4	60	7.98	0.000475862	0.00603818	0.00575251	0.00611259	0.0071892	0.00966008	0.0150989	0.020876	0.0255366	0.0279908	0.0329424	0.041893	0.0542081	0.067811	0.0742341	0.0746275	0.0741503	0.0672526	0.0637469	0.0535228	0.0526847	0.0500306	0.0425705	0.0351705	0.0281775	0.019412	0.014751	0.0112085	0.00707949	0.0060831	0.0026715	0.00104321	0.000473857	0	0	0	0	0	0	0	0	0	0
River	Fraser	P14	160	3	60	5.32	0.000471698	0.00720244	0.00689859	0.00738184	0.00873256	0.0119093	0.0185509	0.0250753	0.0294848	0.0318457	0.0367198	0.0453381	0.0571313	0.0703406	0.0749476	0.0699697	0.070621	0.0627676	0.05981	0.0513573	0.0473171	0.0425667	0.0392346	0.0355681	0.027216	0.0199735	0.0148686	0.0116953	0.00676173	0.00420267	0.00233426	0.00147725	0.000699785	0	0	0	0	0	0	0	0	0	0
River	Fraser	P14	160	2	60	2.66	0.000580954	0.00460326	0.00433674	0.00496521	0.00613494	0.00875113	0.0139099	0.0189832	0.0228676	0.0248744	0.0289223	0.0359608	0.0462898	0.0578471	0.0653181	0.0670448	0.0665069	0.059712	0.0567755	0.0503355	0.0469018	0.0452418	0.042883	0.0410586	0.0401724	0.0359332	0.0305566	0.0246918	0.0182108	0.0155218	0.009515	0.00355843	0.00161547	0	0	0	0	0	0	0	0	0	0
River	Fraser	P14	160	1	60	1.33	0.000757241	0.00421345	0.00430348	0.00471626	0.00578388	0.00809755	0.0130571	0.0184097	0.0223683	0.0246354	0.0288845	0.0361061	0.046925	0.0586415	0.0637002	0.0657052	0.0661841	0.0600428	0.0587358	0.0512197	0.0497796	0.0484214	0.0453703	0.0405894	0.0364262	0.0301289	0.0279149	0.024677	0.0186398	0.0175468	0.0114779	0.0053074	0.00199041	0	0	0	0	0	0	0	0	0	0
River	Fraser	P15	161	6	60	10.44	0.00031875	0.00526659	0.00523213	0.00559164	0.00658375	0.00907982	0.0144125	0.019321	0.0234684	0.0260389	0.0306826	0.038063	0.0505604	0.0658681	0.0779279	0.0810193	0.0834495	0.0760761	0.0771866	0.0652022	0.0594065	0.0530578	0.0422516	0.0280354	0.0204463	0.0147458	0.00952596	0.0060478	0.0028319	0.0012646	0.000763872	0.000509134	8.28406e-05	0	0	0	0	0	0	0	0	0	0
River	Fraser	P15	161	5	60	9.28	0.000341145	0.00402339	0.0039686	0.00432128	0.00521304	0.00708609	0.0107948	0.0149604	0.0183664	0.0202458	0.0241164	0.0312239	0.0416809	0.0547707	0.067357	0.0731813	0.0794792	0.0772209	0.0834662	0.0727194	0.0685285	0.0632456	0.0546105	0.0444969	0.0298365	0.0185213	0.0126999	0.00711421	0.00375659	0.00158496	0.000699772	0.000388858	0.000320908	0	0	0	0	0	0	0	0	0	0
River	Fraser	P15	161	4	60	6.96	0.000369155	0.00310767	0.00327337	0.00377923	0.00491453	0.00717487	0.0112378	0.0151914	0.0186091	0.0204733	0.0243251	0.0331418	0.0482271	0.0663514	0.0786406	0.0824618	0.0839524	0.0778489	0.0794681	0.0692223	0.0624219	0.0586564	0.0490183	0.0351766	0.0247945	0.0159571	0.00936863	0.00638224	0.00400873	0.00182326	0.0005988	0.000238495	0.000154316	0	0	0	0	0	0	0	0	0	0
River	Fraser	P15	161	3	60	4.64	0.000374604	0.00600547	0.00577119	0.00598734	0.00677474	0.00847425	0.0129742	0.0182316	0.0222075	0.024399	0.0285661	0.0357617	0.0486949	0.0667898	0.0762369	0.0800639	0.0829737	0.0780457	0.0766486	0.0659652	0.0563503	0.0506308	0.0409548	0.032635	0.0252909	0.0161815	0.0116719	0.00761376	0.00399658	0.00224602	0.00115969	0.000543241	0.000153819	0	0	0	0	0	0	0	0	0	0
River	Fraser	P15	161	2	60	2.32	0.000391535	0.00595476	0.00562449	0.00592757	0.00688897	0.00929117	0.0142738	0.0195001	0.0233673	0.0254772	0.0299467	0.0383607	0.0494381	0.0616547	0.0752396	0.0812939	0.0825516	0.076559	0.0742268	0.0622809	0.0549219	0.0494065	0.0422055	0.0338052	0.0269147	0.019126	0.0117978	0.00686201	0.00379201	0.00155639	0.00085421	0.000537067	0.000363329	0	0	0	0	0	0	0	0	0	0
River	Fraser	P15	161	1	60	1.16	0.000394557	0.00368669	0.00375692	0.00431165	0.00543731	0.00817266	0.0126552	0.0171155	0.0207933	0.0227081	0.0269992	0.0348169	0.046648	0.0610719	0.0724191	0.07768	0.0830504	0.0801202	0.0814348	0.069398	0.0632579	0.0559231	0.047713	0.0360497	0.0254892	0.0177769	0.0115623	0.00570168	0.00227671	0.00113889	0.000499548	0.000213072	0.000122203	0	0	0	0	0	0	0	0	0	0
River	Fraser	P16	162	6	60	10.17	0.000304321	0.00714071	0.0065259	0.00663302	0.00731065	0.00939496	0.0147586	0.0206824	0.0246279	0.0269552	0.0317357	0.0400534	0.0525724	0.0671963	0.0780884	0.0821539	0.0840797	0.078924	0.0772696	0.0649436	0.0573577	0.0497337	0.0390969	0.0271454	0.0174532	0.0104857	0.00776964	0.00519774	0.00264128	0.00123097	0.000508897	0.00022859	0.000103889	0	0	0	0	0	0	0	0	0	0
River	Fraser	P16	162	5	60	9.04	0.000326627	0.00697566	0.00640276	0.00666445	0.00759808	0.0102785	0.015923	0.0217487	0.0262724	0.0287661	0.0338468	0.043693	0.058511	0.0740879	0.082636	0.0843043	0.0832348	0.0741575	0.0694867	0.0589172	0.0513758	0.0447162	0.0367791	0.0289004	0.0203854	0.0121578	0.00787191	0.00455336	0.00134894	0.00032408	-0.000197119	-0.00089204	-0.00082853	0	0	0	0	0	0	0	0	0	0
River	Fraser	P16	162	4	60	6.78	0.000329274	0.00674803	0.00623338	0.00641172	0.00709477	0.00911811	0.0142314	0.020002	0.0246223	0.0271784	0.0319852	0.0392274	0.0522914	0.0672738	0.0753611	0.0766216	0.0775695	0.0713845	0.0699202	0.0603314	0.0553929	0.0497745	0.0420096	0.0323827	0.0231154	0.0161272	0.0122951	0.0102229	0.00720429	0.00441332	0.00208511	0.000903984	0.000466699	0	0	0	0	0	0	0	0	0	0
River	Fraser	P16	162	3	60	4.52	0.000317219	0.00301218	0.00326443	0.00387657	0.00516199	0.00775925	0.0121593	0.0165601	0.0205424	0.0226579	0.0270518	0.0355898	0.049239	0.0656464	0.0790042	0.0829188	0.0844135	0.0770129	0.0761279	0.0644234	0.0609239	0.0544616	0.04457	0.0350054	0.0258195	0.0160294	0.00876067	0.00629659	0.00421926	0.00364347	0.00209852	0.00111703	0.000632893	0	0	0	0	0	0	0	0	0	0
River	Fraser	P16	162	2	60	2.26	0.000323249	0.00394718	0.00399272	0.00444349	0.00582723	0.00874758	0.0130917	0.017593	0.0212486	0.0234845	0.0278742	0.0357293	0.0483382	0.0640332	0.0749343	0.0771969	0.0780776	0.0713858	0.0691054	0.0594998	0.0556115	0.0523898	0.0504819	0.0406359	0.0296056	0.0232568	0.0153611	0.0103713	0.0067506	0.00430207	0.00203115	0.000526087	0.000125485	0	0	0	0	0	0	0	0	0	0
River	Fraser	P16	162	1	60	1.13	0.000338731	0.00477751	0.00474314	0.005198	0.00631782	0.00879361	0.0135796	0.0184303	0.022331	0.024513	0.0291791	0.0378171	0.050706	0.0654746	0.0742392	0.0760254	0.0768865	0.0726326	0.0733215	0.0615042	0.0568095	0.0528286	0.0462332	0.0361345	0.0280118	0.0213885	0.0143474	0.00886984	0.00486988	0.00248259	0.000928574	0.000423479	0.000201894	0	0	0	0	0	0	0	0	0	0
River	Fraser	P17	163	6	60	9.81	0.000289017	0.0050215	0.00400309	0.0039152	0.00518907	0.00866249	0.0141372	0.0190131	0.023476	0.0258108	0.0313169	0.0418665	0.0580898	0.0773441	0.0891707	0.092184	0.0936553	0.0816061	0.0782578	0.0591676	0.0479741	0.0386705	0.0302555	0.021928	0.0169511	0.0111705	0.00853909	0.00625998	0.00338655	0.00179122	0.000807437	0.00024303	0.000135725	0	0	0	0	0	0	0	0	0	0
River	Fraser	P17	163	5	60	8.72	0.000290276	0.00555318	0.00571075	0.00635461	0.00823005	0.0121721	0.0192244	0.0259551	0.0312514	0.0341059	0.0402	0.0506286	0.0659093	0.0820892	0.0887686	0.086714	0.0832946	0.0708622	0.0635221	0.0518054	0.0452234	0.0375013	0.0294787	0.0208016	0.012791	0.0079747	0.00593749	0.00445619	0.00270559	0.000604076	0.000148757	1.75571e-05	8.10156e-06	0	0	0	0	0	0	0	0	0	0
River	Fraser	P17	163	4	60	6.54	0.000311632	0.00643369	0.00501121	0.00490933	0.00671372	0.0102699	0.0162078	0.0218161	0.0262248	0.028549	0.0335521	0.0431033	0.0576284	0.0731759	0.0780319	0.0770056	0.0741356	0.0642697	0.0599171	0.0515484	0.0486588	0.0475514	0.0419136	0.0344735	0.0270707	0.0215187	0.0157812	0.0115299	0.00547327	0.00530502	0.00174217	0.000318368	0.000159887	0	0	0	0	0	0	0	0	0	0
River	Fraser	P17	163	3	60	4.36	0.000339199	0.00568843	0.00557647	0.0061122	0.00748823	0.0107783	0.016811	0.022823	0.0279758	0.0307114	0.0359034	0.0446195	0.0574299	0.0719922	0.077108	0.0775251	0.0761153	0.0658194	0.0615768	0.0507595	0.047473	0.0435586	0.0376158	0.0310862	0.0240184	0.0181652	0.0138925	0.0134713	0.00763478	0.00533569	0.00327296	0.001256	0.000405531	0	0	0	0	0	0	0	0	0	0
River	Fraser	P17	163	2	60	2.18	0.000365186	0.00746442	0.00715429	0.00771018	0.00927021	0.0129999	0.0206116	0.0280651	0.0340016	0.0369077	0.0426384	0.0522837	0.0662041	0.0801449	0.0789105	0.0743829	0.0694962	0.0587783	0.0513041	0.0442305	0.0408201	0.0388033	0.0349731	0.0301191	0.0236886	0.0191987	0.0128262	0.00770918	0.00438559	0.0025618	0.00106382	0.000688869	0.000603153	0	0	0	0	0	0	0	0	0	0
River	Fraser	P17	163	1	60	1.09	0.000387776	0.0038692	0.00414863	0.00480625	0.0064982	0.00999238	0.0162736	0.0222568	0.0270773	0.029455	0.0349739	0.0447329	0.0594099	0.074168	0.0813276	0.0797133	0.0786572	0.0667828	0.062933	0.0518067	0.0463523	0.0422006	0.037665	0.0309139	0.0249427	0.0181355	0.011409	0.0129327	0.00819981	0.00535738	0.00201383	0.000711582	0.000283082	0	0	0	0	0	0	0	0	0	0
River	Fraser	P18	164	6	60	10.26	0.000305306	0.00435973	0.00475463	0.00550536	0.00720562	0.0109186	0.0176996	0.0242561	0.0296283	0.0320548	0.0372584	0.0470675	0.0628543	0.0813229	0.0867078	0.0856916	0.0822629	0.0701777	0.06435	0.0533597	0.0464241	0.0396873	0.0328505	0.0237136	0.0163917	0.014569	0.00878763	0.00569773	0.00293338	0.00101546	0.000313285	0.000126142	5.45691e-05	0	0	0	0	0	0	0	0	0	0
River	Fraser	P18	164	5	60	9.12	0.000346837	0.00677055	0.00655781	0.00662486	0.00859811	0.0125672	0.019516	0.0269938	0.0320829	0.0344416	0.040001	0.0496055	0.0624598	0.0763405	0.0791576	0.077039	0.0729995	0.0620739	0.0556212	0.04748	0.0432848	0.0388041	0.0353883	0.0290615	0.0239202	0.0195389	0.016252	0.0111012	0.00545892	0.00241935	1.87928e-05	-0.00215654	-2.21883e-05	0	0	0	0	0	0	0	0	0	0
River	Fraser	P18	164	4	60	6.84	0.000343053	0.00719768	0.00703051	0.00759054	0.00913439	0.0127434	0.0202831	0.0282681	0.0330462	0.0355428	0.0404751	0.0489189	0.0625268	0.0757968	0.0788319	0.0761852	0.0728037	0.0631266	0.0569219	0.0476885	0.0429371	0.0390064	0.0368047	0.030028	0.0224902	0.0183668	0.0130381	0.00767541	0.00308251	0.00143221	0.000607556	0.000284291	0.000134564	0	0	0	0	0	0	0	0	0	0
River	Fraser	P18	164	3	60	4.56	0.000394159	0.00437608	0.00478931	0.00553787	0.00696584	0.0103379	0.0167201	0.022484	0.0271121	0.0295553	0.0343336	0.0429824	0.0554701	0.0686428	0.0740174	0.0731743	0.0697608	0.0593166	0.0551397	0.0470116	0.0438617	0.0419764	0.0409509	0.0407158	0.038559	0.030403	0.0240266	0.0118323	0.00852498	0.00607557	0.00333636	0.00146624	0.000543482	0	0	0	0	0	0	0	0	0	0
River	Fraser	P18	164	2	60	2.28	0.000417569	0.00242256	0.00292915	0.00377103	0.00562526	0.00939787	0.0154416	0.0206658	0.0250347	0.0267663	0.0313468	0.0408407	0.0555683	0.0722838	0.0808191	0.082032	0.0821835	0.070195	0.0633148	0.0522626	0.047833	0.0445041	0.0395918	0.0337762	0.025017	0.0213855	0.0192642	0.0130976	0.00876723	0.0046966	0.000146939	-0.000494391	-0.000486563	0	0	0	0	0	0	0	0	0	0
River	Fraser	P18	164	1	60	1.14	0.000509765	0.00484796	0.00512972	0.00585369	0.00739644	0.0106751	0.0168495	0.0229913	0.0272271	0.0297393	0.0345636	0.0423823	0.0534648	0.0663892	0.068058	0.0655985	0.0623694	0.05379	0.0487553	0.042392	0.0405357	0.0395919	0.0422219	0.0421178	0.0404424	0.0383956	0.0335208	0.0238745	0.013385	0.00939232	0.00462875	0.00229637	0.00112329	0	0	0	0	0	0	0	0	0	0
River	Fraser	P19	165	6	60	9	0.000292836	0.00658837	0.00598028	0.00676653	0.00895726	0.0127709	0.0200567	0.0270684	0.0322574	0.0349334	0.0404563	0.0504617	0.0654325	0.0815872	0.0872564	0.0844218	0.0824593	0.0694319	0.0631481	0.0511722	0.0436861	0.0357692	0.0296779	0.021179	0.0142837	0.0115627	0.00690331	0.00401949	0.00218536	0.000891405	0.000210486	-7.3242e-05	-0.00150223	0	0	0	0	0	0	0	0	0	0
River	Fraser	P19	165	5	60	8	0.000286411	0.00708846	0.0069648	0.00770286	0.00943687	0.0134087	0.0211663	0.0290305	0.0347861	0.0374557	0.0427777	0.0521815	0.0650137	0.0797912	0.0830541	0.0800701	0.0762408	0.0668407	0.0599169	0.0499599	0.0435088	0.0372365	0.0307246	0.0242603	0.0184046	0.011061	0.00673167	0.00396053	0.00196644	0.00100592	0.000413725	0.000176153	-0.00233704	0	0	0	0	0	0	0	0	0	0
River	Fraser	P19	165	4	60	6	0.000307212	0.00281843	0.00313963	0.00389693	0.00562164	0.00896647	0.0141284	0.019014	0.0229871	0.024991	0.0292671	0.0377158	0.0510352	0.0663922	0.0759769	0.0792988	0.0809948	0.0705946	0.0687414	0.0571258	0.0536573	0.050245	0.0452902	0.0366346	0.0261377	0.0214287	0.0165488	0.0111057	0.00742215	0.00491951	0.00263307	0.00112412	0.000146829	0	0	0	0	0	0	0	0	0	0
River	Fraser	P19	165	3	60	4	0.000296073	0.00345539	0.00390919	0.00467556	0.00640759	0.00996989	0.0157993	0.0210957	0.0255071	0.0278606	0.0324775	0.0422365	0.0570152	0.0735094	0.0831308	0.0841439	0.0828061	0.0718066	0.0680744	0.0558901	0.0493085	0.043696	0.0403122	0.0319647	0.0239295	0.0186269	0.0110533	0.00706555	0.00279518	0.000818938	0.000402453	0.00016005	9.5973e-05	0	0	0	0	0	0	0	0	0	0
River	Fraser	P19	165	2	60	2	0.000336052	0.00508028	0.00541296	0.00629711	0.00810053	0.0119214	0.0189543	0.0254333	0.0305913	0.0331861	0.0385535	0.0478429	0.0622353	0.0767367	0.0792229	0.0767185	0.0726145	0.0624417	0.056969	0.0502799	0.0474619	0.0424931	0.0391383	0.0302383	0.0206157	0.0185279	0.0127784	0.00892811	0.00494617	0.00341941	0.00157639	0.000790324	0.000493663	0	0	0	0	0	0	0	0	0	0
River	Fraser	P19	165	1	60	1	0.000321027	0.00427841	0.00473367	0.00560362	0.00754317	0.0114323	0.0178588	0.0244542	0.0295216	0.0319031	0.0371192	0.0468102	0.0611365	0.0766946	0.0800947	0.0780353	0.0748435	0.0645211	0.060204	0.0516445	0.0479139	0.0426063	0.0371284	0.0293487	0.0222726	0.0177862	0.0117899	0.0086425	0.00480918	0.00367336	0.00272076	0.00181245	0.00106341	0	0	0	0	0	0	0	0	0	0
River	Fraser	P20	166	6	60	10.44	0.000307539	0.00688916	0.00681942	0.00752542	0.00942385	0.0138819	0.0220873	0.0302894	0.0350085	0.0374311	0.0424833	0.0520798	0.0658502	0.0807729	0.0843186	0.0824225	0.0779081	0.0659081	0.0581101	0.0472294	0.041879	0.0349384	0.0269259	0.0201855	0.013645	0.0113155	0.0076077	0.00660799	0.00536052	0.0035412	0.00107179	0.000362115	0.000120173	0	0	0	0	0	0	0	0	0	0
River	Fraser	P20	166	5	60	9.28	0.000321036	0.00536058	0.00578906	0.0067129	0.00891706	0.0132649	0.021428	0.0281843	0.0333935	0.03608	0.04144	0.0515037	0.0666714	0.0820104	0.0821774	0.0788179	0.0744164	0.0631791	0.0549022	0.0480389	0.0440799	0.0388827	0.0319708	0.0272637	0.0205238	0.0158539	0.0109551	0.00590312	0.0034998	0.00135565	0.00035444	-0.0027143	-0.000216222	0	0	0	0	0	0	0	0	0	0
River	Fraser	P20	166	4	60	6.96	0.000328138	0.00518917	0.00542887	0.0062353	0.00802646	0.0117939	0.0185221	0.0249065	0.029529	0.0319126	0.0372359	0.0474672	0.0624864	0.0795985	0.0852471	0.0830988	0.0804002	0.0690928	0.0604033	0.0510147	0.0450165	0.0394418	0.0333928	0.0268406	0.0195773	0.0155046	0.0105314	0.00600496	0.00291562	0.00172232	0.000711311	0.000448968	0.000303128	0	0	0	0	0	0	0	0	0	0
River	Fraser	P20	166	3	60	4.64	0.000343763	0.00627132	0.00623439	0.00664899	0.00775333	0.0109275	0.0170861	0.0235764	0.0289765	0.031746	0.0370882	0.0460176	0.0589942	0.0735801	0.0770326	0.075715	0.0739049	0.0649578	0.0594875	0.0509139	0.0468378	0.0430681	0.0378168	0.0333984	0.0269991	0.0209607	0.0149917	0.00965358	0.00597973	0.00364129	0.00100683	0.000513279	-0.00177966	0	0	0	0	0	0	0	0	0	0
River	Fraser	P20	166	2	60	2.32	0.000386272	0.00659936	0.00666996	0.00743653	0.00915747	0.0131823	0.020791	0.0281365	0.0332255	0.0354622	0.0403947	0.0497812	0.0632148	0.0772105	0.0792705	0.0768229	0.072053	0.062331	0.055803	0.0483122	0.0442398	0.0418873	0.0365236	0.0303938	0.0230198	0.0183022	0.0109828	0.00571144	0.00202662	0.000720877	0.000239579	6.73781e-05	2.99775e-05	0	0	0	0	0	0	0	0	0	0
River	Fraser	P20	166	1	60	1.16	0.000423026	0.00338416	0.00388715	0.00465792	0.00631415	0.0100805	0.0158678	0.021139	0.0256821	0.028036	0.0329032	0.0425966	0.0582212	0.0769111	0.0878724	0.0903576	0.0893636	0.0756949	0.0690742	0.0563091	0.046614	0.037906	0.0289326	0.0211152	0.0161916	0.0146772	0.0135596	0.00895574	0.00725748	0.00437563	0.00173149	0.000222995	0.000107911	0	0	0	0	0	0	0	0	0	0
River	Fraser	P21	167	6	60	9.45	0.000265171	0.00539605	0.00587235	0.00697173	0.00937741	0.0142269	0.023014	0.030893	0.036704	0.0395698	0.0457093	0.0564752	0.0723185	0.0892194	0.089709	0.0862841	0.081493	0.0678837	0.0584812	0.0485611	0.0396008	0.0300249	0.0236641	0.0162668	0.00993776	0.00656572	0.00348725	0.00170406	0.000432518	0.000130463	1.58562e-05	4.81327e-06	5.06011e-06	0	0	0	0	0	0	0	0	0	0
River	Fraser	P21	167	5	60	8.4	0.000257154	0.00429954	0.00466973	0.00565286	0.00775183	0.0119849	0.0187327	0.0254663	0.0304712	0.0328277	0.0380773	0.0482017	0.0642034	0.0810913	0.087142	0.0863057	0.0846788	0.0707993	0.0646382	0.0538256	0.046467	0.0378637	0.0305742	0.020914	0.0160923	0.0109856	0.00689255	0.00456044	0.00240835	0.00129319	0.000612766	0.000329961	0.000185885	0	0	0	0	0	0	0	0	0	0
River	Fraser	P21	167	4	60	6.3	0.000250829	0.00430686	0.0048254	0.00568673	0.00734496	0.0106739	0.0165086	0.0221829	0.0269768	0.0292465	0.0341601	0.0433566	0.0573309	0.0731878	0.0809502	0.0814476	0.0807038	0.070269	0.06723	0.0582049	0.0535871	0.0477862	0.0413629	0.0305396	0.0208788	0.0135103	0.00727662	0.00423613	0.00232804	0.00165891	0.0010419	0.000568173	0.000631859	0	0	0	0	0	0	0	0	0	0
River	Fraser	P21	167	3	60	4.2	0.000254333	0.00418522	0.00488109	0.00572519	0.00694726	0.0111144	0.0173336	0.0232344	0.0277372	0.0299181	0.0348351	0.044359	0.058916	0.0748536	0.0823903	0.0837021	0.0819038	0.0712655	0.0680255	0.0556857	0.0483967	0.043781	0.0365453	0.0279459	0.0207751	0.0145684	0.00842389	0.00554877	0.00284081	0.00294202	0.000821622	0.000211952	0.000185638	0	0	0	0	0	0	0	0	0	0
River	Fraser	P21	167	2	60	2.1	0.000279778	0.00504459	0.00538346	0.00619993	0.00832946	0.0123022	0.0187737	0.0247593	0.0297134	0.032038	0.036911	0.046111	0.0601715	0.0760317	0.0828451	0.0835518	0.081065	0.0691345	0.0635948	0.0518692	0.0469246	0.0401988	0.0318107	0.0248144	0.0181446	0.0123769	0.00940657	0.00741487	0.00586165	0.00384188	0.0024871	0.00185747	0.00103062	0	0	0	0	0	0	0	0	0	0
River	Fraser	P21	167	1	60	1.05	0.000283392	0.00510016	0.00558091	0.00657299	0.00864673	0.0128089	0.0200431	0.0264046	0.0309755	0.0333206	0.0385858	0.0485513	0.0623153	0.0783852	0.0853013	0.0840122	0.0803851	0.0696581	0.0637881	0.0530813	0.047131	0.0407438	0.0304069	0.0215119	0.0162433	0.0115615	0.00713366	0.00439747	0.00326988	0.0020312	0.00130316	0.000513053	0.000235934	0	0	0	0	0	0	0	0	0	0
River	Fraser	P22	168	6	60	8.37	6.93107e-05	0.000110934	0.000192698	0.00027289	0.000508117	0.001225	0.00298619	0.00530294	0.00891976	0.0108021	0.0147424	0.022578	0.0380592	0.0617303	0.078121	0.0912934	0.105233	0.0996163	0.11582	0.0930831	0.0783735	0.0631662	0.0433154	0.0307045	0.0185151	0.0094983	0.00356077	0.00151504	0.000455624	0.000179617	5.27635e-05	2.29912e-05	4.34768e-05	0	0	0	0	0	0	0	0	0	0
River	Fraser	P22	168	5	60	7.44	8.97537e-05	0.000325528	0.000465772	0.000681041	0.00126209	0.00252977	0.00498543	0.00833518	0.0119432	0.0137003	0.0174212	0.0254041	0.0386657	0.0553319	0.070164	0.0816224	0.0936577	0.0898508	0.100588	0.0884905	0.0820539	0.0741928	0.0524696	0.036621	0.0216546	0.0113287	0.00606009	0.00341148	0.0026284	0.0019072	0.00103971	0.000583572	0.000624407	0	0	0	0	0	0	0	0	0	0
River	Fraser	P22	168	4	60	5.58	9.73672e-05	5.03533e-06	1.2462e-05	3.12638e-05	0.000104768	0.000383438	0.00124525	0.00269505	0.0052443	0.00647255	0.00917442	0.0154659	0.0297157	0.0506848	0.066297	0.0819958	0.0997749	0.0942692	0.118488	0.0982265	0.0846343	0.0777637	0.0525948	0.0399614	0.0239416	0.0169074	0.0139969	0.00606166	0.00279392	0.000751764	0.000223222	4.66453e-05	3.61411e-05	0	0	0	0	0	0	0	0	0	0
River	Fraser	P22	168	3	60	3.72	0.000110802	0.000570682	0.000857565	0.00120604	0.00195086	0.00334286	0.00610661	0.00890831	0.0129782	0.0150072	0.0188631	0.0265059	0.0396236	0.0575405	0.0763124	0.0865257	0.093334	0.0875052	0.096261	0.0799917	0.0709174	0.0633968	0.0512602	0.0390472	0.0271063	0.0159902	0.00934126	0.00513873	0.00258802	0.00104119	0.000550946	0.00017749	5.30891e-05	0	0	0	0	0	0	0	0	0	0
River	Fraser	P22	168	2	60	1.86	0.000104466	0.000325684	0.000546109	0.000829437	0.0015556	0.00308755	0.00579596	0.00993848	0.01371	0.0160697	0.0208994	0.0304687	0.0485279	0.0688273	0.0821626	0.089332	0.0946898	0.0848115	0.089563	0.0759787	0.0704915	0.0656654	0.0479214	0.0362497	0.0219821	0.0103278	0.00433959	0.00286789	0.00143135	0.000864744	0.000492632	0.000116824	0.000129602	0	0	0	0	0	0	0	0	0	0
River	Fraser	P22	168	1	60	0.93	0.000108422	0.000230104	0.000364038	0.000572718	0.00107122	0.00199595	0.00429739	0.00743873	0.0111837	0.0130427	0.0167604	0.0243836	0.037532	0.05346	0.0670356	0.0739744	0.0841035	0.0825623	0.0996059	0.0876285	0.0809521	0.0781647	0.0617174	0.0486892	0.0319231	0.0175762	0.00736168	0.00393873	0.0015601	0.000523749	0.000243395	6.68699e-05	4.00808e-05	0	0	0	0	0	0	0	0	0	0
River	Fraser	P23	169	6	60	9.135	5.28302e-05	6.98675e-06	1.64225e-05	3.93382e-05	0.000144011	0.000617631	0.00204226	0.00452452	0.00778343	0.00906929	0.0123029	0.0190867	0.0320358	0.0498679	0.0654773	0.0778146	0.0935293	0.0878787	0.111437	0.0953874	0.0862432	0.0892401	0.0678598	0.0448586	0.0207237	0.011566	0.00601411	0.00263302	0.00113388	0.00042044	0.000171577	4.46948e-05	2.96945e-05	0	0	0	0	0	0	0	0	0	0
River	Fraser	P23	169	5	60	8.12	9.5544e-05	0.000268742	0.00040514	0.000582985	0.00114514	0.00240755	0.00486452	0.00778787	0.0111042	0.0125987	0.0161805	0.0230636	0.035139	0.0497262	0.0638759	0.0738365	0.0852022	0.0834504	0.102217	0.093031	0.0887724	0.0791842	0.0591594	0.0437412	0.0261964	0.0138142	0.00964359	0.00588476	0.00318526	0.00197833	0.000867908	0.000416691	0.000268586	0	0	0	0	0	0	0	0	0	0
River	Fraser	P23	169	4	60	4.06	0.000127505	0.000705398	0.00104762	0.00147874	0.00232812	0.00412548	0.00687548	0.0101758	0.014086	0.0159614	0.019887	0.0274243	0.0396238	0.0543788	0.0705976	0.0797034	0.0914422	0.0926304	0.105196	0.0915	0.0801067	0.0649753	0.0472631	0.0330242	0.020025	0.0109841	0.00581545	0.00350615	0.00245691	0.00122416	0.000538935	0.00060512	0.000307152	0	0	0	0	0	0	0	0	0	0
River	Fraser	P23	169	3	60	6.09	0.000107541	1.43221e-05	3.66298e-05	8.65878e-05	0.000244453	0.000800019	0.0020161	0.00395648	0.00730508	0.00867216	0.0117183	0.0183562	0.0302287	0.0472838	0.0611351	0.0725375	0.0882939	0.0845846	0.106126	0.0926218	0.0942051	0.0861986	0.0741498	0.0504099	0.0307547	0.0154231	0.00762921	0.00347387	0.00109813	0.000330155	0.00021643	5.53719e-05	3.77629e-05	0	0	0	0	0	0	0	0	0	0
River	Fraser	P23	169	2	60	2.03	0.00012455	0.00018164	0.000319325	0.000533057	0.00111861	0.00250488	0.00484848	0.00751647	0.0106799	0.0122428	0.0153445	0.0217507	0.0325676	0.0468931	0.0629742	0.0740864	0.0849123	0.0855004	0.100318	0.0858518	0.0810879	0.068337	0.0585698	0.0449829	0.0289926	0.0209056	0.0151144	0.00926448	0.00877299	0.00458243	0.00470654	0.00278204	0.00175768	0	0	0	0	0	0	0	0	0	0
River	Fraser	P23	169	1	60	1.015	0.000140585	2.43126e-05	4.88811e-05	0.000100726	0.000287205	0.000961555	0.00223007	0.00432824	0.00738082	0.00864025	0.0116053	0.01872	0.0317454	0.0485937	0.0661314	0.0783835	0.0930206	0.0883957	0.107561	0.0915665	0.0838749	0.0808741	0.062955	0.0474313	0.0300885	0.0176517	0.00862098	0.00415061	0.00233646	0.00097893	0.00055981	0.000466623	0.000286281	0	0	0	0	0	0	0	0	0	0
River	Fraser	P24	170	6	60	8.37	8.9644e-05	0.000767917	0.000950359	0.00104664	0.00129474	0.00219905	0.00566479	0.0125909	0.0213703	0.0253793	0.0340232	0.0509009	0.0814411	0.119871	0.124734	0.12073	0.111891	0.0832744	0.0639979	0.0417074	0.0288418	0.0218083	0.016089	0.0112341	0.00791185	0.00607843	0.00283079	0.00114088	0.000193779	3.10105e-05	4.79859e-06	5.90723e-07	3.09566e-07	0	0	0	0	0	0	0	0	0	0
River	Fraser	P24	170	5	60	7.44	8.11144e-05	0.000496119	0.000693535	0.000941683	0.00146501	0.00251991	0.00450899	0.00705193	0.0101831	0.0120499	0.0160503	0.0243126	0.0387968	0.0585226	0.0810721	0.0918104	0.101331	0.0940822	0.103364	0.0829694	0.0728123	0.0611831	0.048331	0.0340254	0.0223331	0.0124561	0.00786907	0.0048768	0.00187032	0.000838376	0.000783379	0.000300866	9.86285e-05	0	0	0	0	0	0	0	0	0	0
River	Fraser	P24	170	4	60	5.58	8.36018e-05	1.8345e-05	5.01992e-05	0.000107342	0.000257472	0.000773415	0.00197608	0.00399835	0.00700627	0.00860642	0.0120614	0.019222	0.0317683	0.0509046	0.0672401	0.0802842	0.0927471	0.0868232	0.105976	0.0909466	0.0841584	0.0757128	0.0581263	0.0471008	0.0305546	0.0174787	0.0113784	0.0072806	0.00392219	0.00175258	0.000990488	0.000464588	0.000312126	0	0	0	0	0	0	0	0	0	0
River	Fraser	P24	170	3	60	3.72	9.75418e-05	0.000107642	0.000194815	0.000324365	0.000704906	0.00178116	0.00425742	0.00762366	0.0115799	0.0133824	0.0174425	0.0261895	0.0402363	0.0595377	0.0726371	0.0813529	0.091543	0.0871157	0.100392	0.0857062	0.0777151	0.0706774	0.0546555	0.0362963	0.0216881	0.0141281	0.00741887	0.00600425	0.00469591	0.00216336	0.00112248	0.00071893	0.000606989	0	0	0	0	0	0	0	0	0	0
River	Fraser	P24	170	2	60	1.86	0.000103184	0.000473109	0.000730921	0.00108912	0.00180292	0.0036383	0.00690141	0.0104469	0.014616	0.016782	0.0212036	0.0300641	0.044034	0.0607264	0.0754569	0.0834728	0.0898116	0.0835615	0.0941443	0.0818133	0.074836	0.0660994	0.0496544	0.0348095	0.0234546	0.0130973	0.00725995	0.00438688	0.00245467	0.00144597	0.00103012	0.000426948	0.000275107	0	0	0	0	0	0	0	0	0	0
River	Fraser	P24	170	1	60	0.93	0.000106132	1.91908e-05	4.70707e-05	9.80253e-05	0.000272252	0.000914025	0.00229206	0.00427257	0.00721324	0.00872045	0.0120144	0.0189605	0.0322778	0.0511316	0.0695723	0.0803434	0.0945214	0.0887196	0.104686	0.0868519	0.0802283	0.0767962	0.0615404	0.0466969	0.0324476	0.019067	0.0111967	0.00591596	0.00210872	0.000675489	0.000209393	9.29801e-05	9.6765e-05	0	0	0	0	0	0	0	0	0	0
River	Fraser	P25	171	6	60	7.83	8.14034e-05	0.000181992	0.000307347	0.00050789	0.00110952	0.00186656	0.00391913	0.00680843	0.0108372	0.0126761	0.016686	0.0248405	0.0380767	0.055712	0.0733701	0.0879504	0.101167	0.0898773	0.102635	0.0853023	0.077815	0.0666558	0.0478027	0.0323765	0.019717	0.0141532	0.0095726	0.00663615	0.00454061	0.00304933	0.00166285	0.00152239	0.000664699	0	0	0	0	0	0	0	0	0	0
River	Fraser	P25	171	5	60	6.96	7.19884e-05	0.000235466	0.000399228	0.000705402	0.00136909	0.00267597	0.00524417	0.00839453	0.0133652	0.015492	0.0196206	0.0277914	0.0425703	0.0587358	0.0751401	0.0896133	0.102166	0.0941342	0.099715	0.078344	0.0706592	0.0624093	0.0434254	0.0316106	0.0207246	0.012071	0.00919067	0.00720392	0.00392909	0.0022087	0.000597493	0.000196786	6.1839e-05	0	0	0	0	0	0	0	0	0	0
River	Fraser	P25	171	4	60	5.22	8.98473e-05	2.49197e-05	5.18436e-05	0.00010467	0.000337969	0.00108788	0.00268248	0.0046452	0.00742948	0.00875258	0.0122612	0.0197761	0.0328158	0.0498086	0.0662208	0.076108	0.0873298	0.0831255	0.100314	0.0854341	0.0803871	0.0776958	0.0658925	0.0495616	0.0315173	0.0221911	0.0131565	0.00933618	0.00594129	0.00374222	0.00129663	0.0004654	0.000505458	0	0	0	0	0	0	0	0	0	0
River	Fraser	P25	171	3	60	3.48	9.08966e-05	0.000628631	0.000840694	0.00117791	0.00199026	0.00371896	0.0060547	0.00813247	0.0112439	0.0131124	0.0172424	0.0258867	0.0399499	0.0576438	0.0799259	0.0885035	0.100496	0.0972708	0.104219	0.0815801	0.0677304	0.0574352	0.0461951	0.0352666	0.0202539	0.0129139	0.00774026	0.00516562	0.0032436	0.0023352	0.00139769	0.000418818	0.000285407	0	0	0	0	0	0	0	0	0	0
River	Fraser	P25	171	2	60	1.74	9.93349e-05	9.03118e-06	2.42024e-05	5.57225e-05	0.00017721	0.000551497	0.00143427	0.00277479	0.00549732	0.00692636	0.0104119	0.0178977	0.0320941	0.0529202	0.0685938	0.0822719	0.0983834	0.0876144	0.110623	0.0913327	0.0847737	0.0754562	0.0584973	0.039615	0.0262822	0.0188843	0.0121965	0.00735841	0.00437556	0.00195251	0.000560186	0.000299271	0.000154788	0	0	0	0	0	0	0	0	0	0
River	Fraser	P25	171	1	60	0.87	9.44819e-05	0.000623355	0.000615377	0.000830213	0.00148237	0.00216062	0.00386451	0.00633885	0.00959552	0.0114439	0.0152646	0.0234216	0.038678	0.0569631	0.0707094	0.0800378	0.0894203	0.0858201	0.100332	0.087987	0.082386	0.0755881	0.0589217	0.0400288	0.0252998	0.0147162	0.00835831	0.00417266	0.00229412	0.00124736	0.000734808	0.000405061	0.000258019	0	0	0	0	0	0	0	0	0	0
Exp	Barton55	R1	172	10	1	0.207313	7.09434e-05
Exp	Barton55	R1	172	9	1	0.176644	0.000101132
Exp	Barton55	R1	172	8	1	0.146213	0.000120755
Exp	Barton55	R1	172	7	1	0.130997	0.000130189
Exp	Barton55	R1	172	6	1	0.115781	0.000279245
Exp	Barton55	R1	172	5	1	0.100566	0.000309434
Exp	Barton55	R1	172	4	1	0.0853501	0.000422642
Exp	Barton55	R1	172	3	1	0.0701345	0.000343396
Exp	Barton55	R1	172	2	1	0.0549189	0.000566038
Exp	Barton55	R1	172	1	1	0.0397032	0.000683019
Exp	Barton55	R3	173	8	1	0.155497	5.39623e-06
Exp	Barton55	R3	173	7	1	0.140135	6.86792e-06
Exp	Barton55	R3	173	6	1	0.124944	6.5283e-06
Exp	Barton55	R3	173	5	1	0.124944	1.16981e-05
Exp	Barton55	R3	173	4	1	0.109752	1.15094e-05
Exp	Barton55	R3	173	3	1	0.0945612	1.15094e-05
Exp	Barton55	R3	173	2	1	0.0791992	1.39623e-05
Exp	Barton55	R3	173	1	1	0.064008	1.92453e-05
Exp	Barton55	R5	174	10	1	0.174742	8.30189e-05
Exp	Barton55	R5	174	9	1	0.15938	0.00010566
Exp	Barton55	R5	174	8	1	0.144018	8.67925e-05
Exp	Barton55	R5	174	7	1	0.128848	8.67925e-05
Exp	Barton55	R5	174	6	1	0.111758	0.000128302
Exp	Barton55	R5	174	5	1	0.0983163	0.000143396
Exp	Barton55	R5	174	4	1	0.0793059	0.000139623
Exp	Barton55	R5	174	3	1	0.0679765	0.000154717
Exp	Barton55	R5	174	2	1	0.0526146	0.000188679
Exp	Barton55	R5	174	1	1	0.0374447	0.000313208
Exp	Barton55	R6	175	11	1	0.194959	9.0566e-05
Exp	Barton55	R6	175	10	1	0.179817	8.30189e-05
Exp	Barton55	R6	175	9	1	0.164674	0.000109434
Exp	Barton55	R6	175	8	1	0.149742	0.000113208
Exp	Barton55	R6	175	7	1	0.1346	0.000124528
Exp	Barton55	R6	175	6	1	0.119247	0.000132075
Exp	Barton55	R6	175	5	1	0.104104	0.000143396
Exp	Barton55	R6	175	4	1	0.0891723	0.000154717
Exp	Barton55	R6	175	3	1	0.0746608	0.000188679
Exp	Barton55	R6	175	2	1	0.0588874	0.00025283
Exp	Barton55	R6	175	1	1	0.0437449	0.000283019
Exp	Barton55	R7	176	12	1	0.24067	8.49057e-05
Exp	Barton55	R7	176	11	1	0.225564	9.28302e-05
Exp	Barton55	R7	176	10	1	0.210458	0.000101509
Exp	Barton55	R7	176	9	1	0.195096	9.81132e-05
Exp	Barton55	R7	176	8	1	0.17999	0.000154717
Exp	Barton55	R7	176	7	1	0.164629	0.000132453
Exp	Barton55	R7	176	6	1	0.149267	0.000151698
Exp	Barton55	R7	176	5	1	0.134161	0.00019283
Exp	Barton55	R7	176	4	1	0.118799	0.00019283
Exp	Barton55	R7	176	3	1	0.103693	0.000219623
Exp	Barton55	R7	176	2	1	0.088331	0.000291698
Exp	Barton55	R7	176	1	1	0.0732252	0.000410566
Exp	Barton55	R10	177	13	1	0.146277	0.00358491
Exp	Barton55	R10	177	12	1	0.137105	0.0045283
Exp	Barton55	R10	177	11	1	0.127934	0.00471698
Exp	Barton55	R10	177	10	1	0.118918	0.00509434
Exp	Barton55	R10	177	9	1	0.109591	0.00509434
Exp	Barton55	R10	177	8	1	0.100419	0.00566038
Exp	Barton55	R10	177	7	1	0.0914034	0.0054717
Exp	Barton55	R10	177	6	1	0.082232	0.00566038
Exp	Barton55	R10	177	5	1	0.0730606	0.00660377
Exp	Barton55	R10	177	4	1	0.0638891	0.00679245
Exp	Barton55	R10	177	3	1	0.0547177	0.00603774
Exp	Barton55	R10	177	2	1	0.0457017	0.00641509
Exp	Barton55	R10	177	1	1	0.0365303	0.00754717
Exp	Barton55	R11	178	11	1	0.12128	1.81132e-05
Exp	Barton55	R11	178	10	1	0.112166	2.18868e-05
Exp	Barton55	R11	178	9	1	0.102772	2.30189e-05
Exp	Barton55	R11	178	8	1	0.0932383	2.03774e-05
Exp	Barton55	R11	178	7	1	0.0841248	2.03774e-05
Exp	Barton55	R11	178	6	1	0.0747309	2.49057e-05
Exp	Barton55	R11	178	5	1	0.0653369	2.71698e-05
Exp	Barton55	R11	178	4	1	0.0560832	3.69811e-05
Exp	Barton55	R11	178	3	1	0.0466893	3.32075e-05
Exp	Barton55	R11	178	2	1	0.0372953	5.28302e-05
Exp	Barton55	R11	178	1	1	0.0280416	4.15094e-05
Exp	Barton55	R12	179	8	1	0.170389	1.13208e-05
Exp	Barton55	R12	179	7	1	0.1378	9.81132e-06
Exp	Barton55	R12	179	6	1	0.109033	1.0566e-05
Exp	Barton55	R12	179	5	1	0.0935431	1.54717e-05
Exp	Barton55	R12	179	4	1	0.0782544	9.43396e-06
Exp	Barton55	R12	179	3	1	0.0629656	2.03774e-05
Exp	Barton55	R12	179	2	1	0.0474756	2e-05
Exp	Barton55	R12	179	1	1	0.0321869	2.49057e-05
Exp	Barton55	R13	180	10	1	0.152248	5.20755e-06
Exp	Barton55	R13	180	9	1	0.140068	1.03396e-05
Exp	Barton55	R13	180	8	1	0.127888	1.10943e-05
Exp	Barton55	R13	180	7	1	0.115544	1.43396e-05
Exp	Barton55	R13	180	6	1	0.103364	1.28302e-05
Exp	Barton55	R13	180	5	1	0.091184	1.28302e-05
Exp	Barton55	R13	180	4	1	0.0788396	1.69811e-05
Exp	Barton55	R13	180	3	1	0.0666598	1.4717e-05
Exp	Barton55	R13	180	2	1	0.05448	2e-05
Exp	Barton55	R13	180	1	1	0.0421356	1.84906e-05
Exp	Barton55	R15	181	8	1	0.129068	0.000188679
Exp	Barton55	R15	181	7	1	0.121798	0.00025283
Exp	Barton55	R15	181	6	1	0.106299	0.000237736
Exp	Barton55	R15	181	5	1	0.0907999	0.000324528
Exp	Barton55	R15	181	4	1	0.0755752	0.000516981
Exp	Barton55	R15	181	3	1	0.0602132	0.000554717
Exp	Barton55	R15	181	2	1	0.0448513	0.000535849
Exp	Barton55	R15	181	1	1	0.0294894	0.000966038
Exp	Barton55	R16	182	9	1	0.112288	7.54717e-05
Exp	Barton55	R16	182	8	1	0.102535	9.32075e-05
Exp	Barton55	R16	182	7	1	0.093025	8.9434e-05
Exp	Barton55	R16	182	6	1	0.0833933	0.000198113
Exp	Barton55	R16	182	5	1	0.0737616	0.000190189
Exp	Barton55	R16	182	4	1	0.064008	0.00024717
Exp	Barton55	R16	182	3	1	0.0543763	0.00028566
Exp	Barton55	R16	182	2	1	0.0448666	0.000641509
Exp	Barton55	R16	182	1	1	0.0352349	0.000596226
Exp	Barton55	R17	183	9	1	0.10073	6.79245e-05
Exp	Barton55	R17	183	8	1	0.0916229	6.49057e-05
Exp	Barton55	R17	183	7	1	0.0828446	7.32075e-05
Exp	Barton55	R17	183	6	1	0.0739567	8.5283e-05
Exp	Barton55	R17	183	5	1	0.0648492	8.90566e-05
Exp	Barton55	R17	183	4	1	0.0559613	0.000104151
Exp	Barton55	R17	183	3	1	0.0470733	0.00014717
Exp	Barton55	R17	183	2	1	0.0381853	0.000199245
Exp	Barton55	R17	183	1	1	0.0291876	0.000205283
Exp	Barton55	R18	184	15	1	0.194749	0.00022717
Exp	Barton55	R18	184	14	1	0.179186	0.000275472
Exp	Barton55	R18	184	13	1	0.163623	0.000312453
Exp	Barton55	R18	184	12	1	0.14806	0.000353208
Exp	Barton55	R18	184	11	1	0.132497	0.00037283
Exp	Barton55	R18	184	10	1	0.117775	0.000403019
Exp	Barton55	R18	184	9	1	0.10095	0.000461887
Exp	Barton55	R18	184	8	1	0.0858073	0.000506415
Exp	Barton55	R18	184	7	1	0.0702442	0.000563019
Exp	Barton55	R18	184	6	1	0.0624627	0.000605283
Exp	Barton55	R18	184	5	1	0.0546811	0.000611321
Exp	Barton55	R18	184	4	1	0.0466893	0.000667547
Exp	Barton55	R18	184	3	1	0.0389077	0.000781132
Exp	Barton55	R18	184	2	1	0.0311262	0.000895849
Exp	Barton55	R18	184	1	1	0.0233446	0.000898868
Exp	Barton55	R19	185	16	1	0.213512	0.000125283
Exp	Barton55	R19	185	15	1	0.198196	0.000169811
Exp	Barton55	R19	185	14	1	0.18288	0.000183396
Exp	Barton55	R19	185	13	1	0.167564	0.000212075
Exp	Barton55	R19	185	12	1	0.152248	0.000232453
Exp	Barton55	R19	185	11	1	0.136931	0.000261132
Exp	Barton55	R19	185	10	1	0.121615	0.000282264
Exp	Barton55	R19	185	9	1	0.106299	0.000321509
Exp	Barton55	R19	185	8	1	0.0909828	0.000356226
Exp	Barton55	R19	185	7	1	0.0681228	0.000396981
Exp	Barton55	R19	185	6	1	0.052578	0.00048
Exp	Barton55	R19	185	5	1	0.0372618	0.000586415
Exp	Barton55	R19	185	4	1	0.0219456	0.000909434
Exp	Barton55	R19	185	3	1	0.0146304	0.00112151
Exp	Barton55	R19	185	2	1	0.0070866	0.00205132
Exp	Barton55	R19	185	1	1	0.003429	0.0027517
Exp	Barton55	R20	186	15	1	0.170682	0.000138113
Exp	Barton55	R20	186	14	1	0.15525	0.000172075
Exp	Barton55	R20	186	13	1	0.140004	0.000211321
Exp	Barton55	R20	186	12	1	0.124572	0.000233962
Exp	Barton55	R20	186	11	1	0.10914	0.000256604
Exp	Barton55	R20	186	10	1	0.0937077	0.000307925
Exp	Barton55	R20	186	9	1	0.0784616	0.000315472
Exp	Barton55	R20	186	8	1	0.0630296	0.000384906
Exp	Barton55	R20	186	7	1	0.0475976	0.000471698
Exp	Barton55	R20	186	6	1	0.0399745	0.000920755
Exp	Barton55	R20	186	5	1	0.0323515	0.000660377
Exp	Barton55	R20	186	4	1	0.0245425	0.000807547
Exp	Barton55	R20	186	3	1	0.0169194	0.00106415
Exp	Barton55	R20	186	2	1	0.0092964	0.00178868
Exp	Barton55	R20	186	1	1	0.00148742	0.00441509
Exp	Barton55	R21	187	11	1	0.0824789	1.53962e-05
Exp	Barton55	R21	187	10	1	0.0735178	1.72075e-05
Exp	Barton55	R21	187	9	1	0.0645566	3.30566e-05
Exp	Barton55	R21	187	8	1	0.0555955	3.01132e-05
Exp	Barton55	R21	187	7	1	0.0512064	4.71698e-05
Exp	Barton55	R21	187	6	1	0.0467258	3.46038e-05
Exp	Barton55	R21	187	5	1	0.0422453	4.98113e-05
Exp	Barton55	R21	187	4	1	0.0377647	3.50189e-05
Exp	Barton55	R21	187	3	1	0.0333756	8.75472e-05
Exp	Barton55	R21	187	2	1	0.028895	0.000118491
Exp	Barton55	R21	187	1	1	0.0244145	0.000141132
Exp	Barton55	R22	188	14	1	0.216591	0.000115094
Exp	Barton55	R22	188	13	1	0.201534	0.000135472
Exp	Barton55	R22	188	12	1	0.186477	0.000150566
Exp	Barton55	R22	188	11	1	0.156131	0.000180755
Exp	Barton55	R22	188	10	1	0.141074	0.00019283
Exp	Barton55	R22	188	9	1	0.125785	0.00018566
Exp	Barton55	R22	188	8	1	0.110728	0.000207925
Exp	Barton55	R22	188	7	1	0.095439	0.000226038
Exp	Barton55	R22	188	6	1	0.0801502	0.000260377
Exp	Barton55	R22	188	5	1	0.0653247	0.000309434
Exp	Barton55	R22	188	4	1	0.050036	0.000360377
Exp	Barton55	R22	188	3	1	0.0440131	0.000535849
Exp	Barton55	R22	188	2	1	0.0257129	0.00115472
Exp	Barton55	R22	188	1	1	0.0196901	0.00353585
Exp	Barton55	R23	189	13	1	0.182865	8.30189e-05
Exp	Barton55	R23	189	12	1	0.16761	0.000109434
Exp	Barton55	R23	189	11	1	0.152354	0.000128302
Exp	Barton55	R23	189	10	1	0.137099	0.000143396
Exp	Barton55	R23	189	9	1	0.121844	0.000166038
Exp	Barton55	R23	189	8	1	0.106589	0.00014717
Exp	Barton55	R23	189	7	1	0.0913333	0.000207547
Exp	Barton55	R23	189	6	1	0.0760781	0.000267925
Exp	Barton55	R23	189	5	1	0.0608228	0.000245283
Exp	Barton55	R23	189	4	1	0.0455676	0.000335849
Exp	Barton55	R23	189	3	1	0.0303124	0.000396226
Exp	Barton55	R23	189	2	1	0.0150571	0.000660377
Exp	Barton55	R23	189	1	1	0.00752856	0.00166038
Exp	Barton55	R25	190	16	1	0.207313	0.000181132
Exp	Barton55	R25	190	15	1	0.192097	0.000201887
Exp	Barton55	R25	190	14	1	0.176882	0.000222642
Exp	Barton55	R25	190	13	1	0.161666	0.000245283
Exp	Barton55	R25	190	12	1	0.14645	0.000271698
Exp	Barton55	R25	190	11	1	0.131235	0.00030566
Exp	Barton55	R25	190	10	1	0.116019	0.000335849
Exp	Barton55	R25	190	9	1	0.100803	0.000354717
Exp	Barton55	R25	190	8	1	0.0855878	0.000415094
Exp	Barton55	R25	190	7	1	0.0703722	0.000490566
Exp	Barton55	R25	190	6	1	0.0551566	0.000667925
Exp	Barton55	R25	190	5	1	0.0456468	0.000754717
Exp	Barton55	R25	190	4	1	0.039941	0.000841509
Exp	Barton55	R25	190	3	1	0.0318577	0.000811321
Exp	Barton55	R25	190	2	1	0.0247254	0.00220377
Exp	Barton55	R25	190	1	1	0.0168798	0.00235849
Exp	Barton55	R26	191	16	1	0.194749	8.67925e-05
Exp	Barton55	R26	191	15	1	0.179817	0.000116981
Exp	Barton55	R26	191	14	1	0.164254	0.000128302
Exp	Barton55	R26	191	13	1	0.149111	0.000162264
Exp	Barton55	R26	191	12	1	0.133548	0.000181132
Exp	Barton55	R26	191	11	1	0.118406	0.000203774
Exp	Barton55	R26	191	10	1	0.103053	0.000233962
Exp	Barton55	R26	191	9	1	0.0874898	0.00025283
Exp	Barton55	R26	191	8	1	0.0723473	0.000301887
Exp	Barton55	R26	191	7	1	0.0567842	0.000369811
Exp	Barton55	R26	191	6	1	0.0475305	0.000490566
Exp	Barton55	R26	191	5	1	0.0414315	0.000596226
Exp	Barton55	R26	191	4	1	0.0321777	0.000818868
Exp	Barton55	R26	191	3	1	0.0260787	0.000898113
Exp	Barton55	R26	191	2	1	0.0169301	0.00181509
Exp	Barton55	R26	191	1	1	0.01081	0.00771321
Exp	Barton55	R27	192	14	1	0.111923	6.03774e-05
Exp	Barton55	R27	192	13	1	0.101803	7.92453e-05
Exp	Barton55	R27	192	12	1	0.0916838	0.000101887
Exp	Barton55	R27	192	11	1	0.0816864	0.000116981
Exp	Barton55	R27	192	10	1	0.071567	0.000132075
Exp	Barton55	R27	192	9	1	0.0615696	0.000169811
Exp	Barton55	R27	192	8	1	0.0514502	0.00020566
Exp	Barton55	R27	192	7	1	0.0413309	0.000222642
Exp	Barton55	R27	192	6	1	0.0312115	0.000328302
Exp	Barton55	R27	192	5	1	0.0252374	0.000388679
Exp	Barton55	R27	192	4	1	0.0212141	0.000539623
Exp	Barton55	R27	192	3	1	0.0151181	0.000875472
Exp	Barton55	R27	192	2	1	0.0110947	0.00181887
Exp	Barton55	R27	192	1	1	0.00499872	0.00405283
Exp	Barton55	R28	193	14	1	0.129479	0.000135849
Exp	Barton55	R28	193	13	1	0.115434	0.000160377
Exp	Barton55	R28	193	12	1	0.100072	0.000181132
Exp	Barton55	R28	193	11	1	0.08471	0.000203774
Exp	Barton55	R28	193	10	1	0.0753466	0.000233962
Exp	Barton55	R28	193	9	1	0.0692018	0.00025283
Exp	Barton55	R28	193	8	1	0.0599846	0.000343396
Exp	Barton55	R28	193	7	1	0.0538399	0.00030566
Exp	Barton55	R28	193	6	1	0.0446227	0.000445283
Exp	Barton55	R28	193	5	1	0.038478	0.000354717
Exp	Barton55	R28	193	4	1	0.0292608	0.000381132
Exp	Barton55	R28	193	3	1	0.023116	0.000418868
Exp	Barton55	R28	193	2	1	0.0138989	0.000762264
Exp	Barton55	R28	193	1	1	0.00775411	0.000683019
Exp	Barton55	R29	194	14	1	0.167884	6.03774e-05
Exp	Barton55	R29	194	13	1	0.170993	7.92453e-05
Exp	Barton55	R29	194	12	1	0.137526	0.000101887
Exp	Barton55	R29	194	11	1	0.12253	0.000116981
Exp	Barton55	R29	194	10	1	0.107351	0.000132075
Exp	Barton55	R29	194	9	1	0.0923544	0.000169811
Exp	Barton55	R29	194	8	1	0.0771754	0.00020566
Exp	Barton55	R29	194	7	1	0.0619963	0.000222642
Exp	Barton55	R29	194	6	1	0.0468173	0.000328302
Exp	Barton55	R29	194	5	1	0.0378562	0.000388679
Exp	Barton55	R29	194	4	1	0.0318211	0.000539623
Exp	Barton55	R29	194	3	1	0.0226771	0.000875472
Exp	Barton55	R29	194	2	1	0.0166421	0.00181887
Exp	Barton55	R29	194	1	1	0.00749808	0.00405283
Exp	Barton55	R31	195	12	1	0.109972	2.49057e-05
Exp	Barton55	R31	195	11	1	0.101224	3.16981e-05
Exp	Barton55	R31	195	10	1	0.0924763	3.62264e-05
Exp	Barton55	R31	195	9	1	0.0837286	4.5283e-05
Exp	Barton55	R31	195	8	1	0.0749808	5.62264e-05
Exp	Barton55	R31	195	7	1	0.0649834	7.69811e-05
Exp	Barton55	R31	195	6	1	0.0562356	0.000100377
Exp	Barton55	R31	195	5	1	0.0474878	0.000127547
Exp	Barton55	R31	195	4	1	0.0387401	0.000173962
Exp	Barton55	R31	195	3	1	0.0299923	0.000300755
Exp	Barton55	R31	195	2	1	0.0212446	0.000562264
Exp	Barton55	R31	195	1	1	0.011872	0.00158113
Exp	Barton55	R32	196	14	1	0.207151	8.30189e-05
Exp	Barton55	R32	196	13	1	0.192021	9.43396e-05
Exp	Barton55	R32	196	12	1	0.176891	0.000109434
Exp	Barton55	R32	196	11	1	0.161538	0.000109434
Exp	Barton55	R32	196	10	1	0.146408	0.000135849
Exp	Barton55	R32	196	9	1	0.131277	0.00014717
Exp	Barton55	R32	196	8	1	0.115925	0.000181132
Exp	Barton55	R32	196	7	1	0.100794	0.000203774
Exp	Barton55	R32	196	6	1	0.085664	0.000188679
Exp	Barton55	R32	196	5	1	0.0707563	0.000222642
Exp	Barton55	R32	196	4	1	0.055181	0.000230189
Exp	Barton55	R32	196	3	1	0.0400507	0.000324528
Exp	Barton55	R32	196	2	1	0.0249204	0.000320755
Exp	Barton55	R32	196	1	1	0.00979018	0.000373585
Exp	Barton55	R33	197	13	1	0.283805	9.84906e-05
Exp	Barton55	R33	197	12	1	0.253039	0.000125283
Exp	Barton55	R33	197	11	1	0.222586	0.000156226
Exp	Barton55	R33	197	10	1	0.19182	0.000172453
Exp	Barton55	R33	197	9	1	0.161681	0.000195849
Exp	Barton55	R33	197	8	1	0.130915	0.000218491
Exp	Barton55	R33	197	7	1	0.115845	0.000229811
Exp	Barton55	R33	197	6	1	0.100462	0.000252075
Exp	Barton55	R33	197	5	1	0.0853928	0.000302642
Exp	Barton55	R33	197	4	1	0.0700095	0.000330943
Exp	Barton55	R33	197	3	1	0.0549402	0.000392453
Exp	Barton55	R33	197	2	1	0.0395569	0.000411321
Exp	Barton55	R33	197	1	1	0.0243621	0.000422642
Exp	Barton55	R34	198	17	1	0.389918	5.4717e-05
Exp	Barton55	R34	198	16	1	0.359634	6.15094e-05
Exp	Barton55	R34	198	15	1	0.329349	6.98113e-05
Exp	Barton55	R34	198	14	1	0.298643	7.58491e-05
Exp	Barton55	R34	198	13	1	0.268358	8.11321e-05
Exp	Barton55	R34	198	12	1	0.237653	9.20755e-05
Exp	Barton55	R34	198	11	1	0.207368	0.000101509
Exp	Barton55	R34	198	10	1	0.176662	0.000109811
Exp	Barton55	R34	198	9	1	0.16152	0.000109057
Exp	Barton55	R34	198	8	1	0.146377	0.000119623
Exp	Barton55	R34	198	7	1	0.131235	0.000125283
Exp	Barton55	R34	198	6	1	0.116092	0.000141887
Exp	Barton55	R34	198	5	1	0.100529	0.000151321
Exp	Barton55	R34	198	4	1	0.0853867	0.000163019
Exp	Barton55	R34	198	3	1	0.0702442	0.000157736
Exp	Barton55	R34	198	2	1	0.0546811	0.00023434
Exp	Barton55	R34	198	1	1	0.0395387	0.00028
Exp	Barton55	R35	199	15	1	0.155326	0.000101887
Exp	Barton55	R35	199	14	1	0.139964	0.00014717
Exp	Barton55	R35	199	13	1	0.124602	0.000188679
Exp	Barton55	R35	199	12	1	0.10924	0.000237736
Exp	Barton55	R35	199	11	1	0.0938784	0.00030566
Exp	Barton55	R35	199	10	1	0.0791992	0.000335849
Exp	Barton55	R35	199	9	1	0.064008	0.000407547
Exp	Barton55	R35	199	8	1	0.056327	0.000445283
Exp	Barton55	R35	199	7	1	0.0488168	0.00049434
Exp	Barton55	R35	199	6	1	0.0411358	0.000566038
Exp	Barton55	R35	199	5	1	0.0334548	0.000649057
Exp	Barton55	R35	199	4	1	0.0259446	0.000886792
Exp	Barton55	R35	199	3	1	0.0182636	0.00129434
Exp	Barton55	R35	199	2	1	0.0107533	0.00272075
Exp	Barton55	R35	199	1	1	0.00307238	0.00969811
Exp	Barton55	R36	200	14	1	0.146197	9.73585e-05
Exp	Barton55	R36	200	13	1	0.130851	0.000221887
Exp	Barton55	R36	200	12	1	0.115504	0.000220377
Exp	Barton55	R36	200	11	1	0.100157	0.000288302
Exp	Barton55	R36	200	10	1	0.0848106	0.000367547
Exp	Barton55	R36	200	9	1	0.0696255	0.000460377
Exp	Barton55	R36	200	8	1	0.0618714	0.000543396
Exp	Barton55	R36	200	7	1	0.0542788	0.000713208
Exp	Barton55	R36	200	6	1	0.0465247	0.000728302
Exp	Barton55	R36	200	5	1	0.0389321	0.00100377
Exp	Barton55	R36	200	4	1	0.031178	0.00135849
Exp	Barton55	R36	200	3	1	0.0235854	0.00189434
Exp	Barton55	R36	200	2	1	0.0159282	0.00323019
Exp	Barton55	R36	200	1	1	0.00827105	0.00799245
Exp	Brooks54	R2	201	1	1	0.0048768	0.0054717
Exp	Brooks54	R2	201	2	1	0.0064008	0.00361132
Exp	Brooks54	R2	201	3	1	0.0109728	0.0012717
Exp	Brooks54	R2	201	4	1	0.0170688	0.0006
Exp	Brooks54	R2	201	5	1	0.035052	0.000109434
Exp	Brooks54	R2	201	6	1	0.050292	3.92453e-05
Exp	Brooks54	R2	201	7	1	0.065532	1.0566e-05
Exp	Brooks54	R2	201	8	1	0.0749808	7.16981e-06
Exp	Brooks54	R2	201	9	1	0.075	3.77358e-06
Exp	Brooks54	R3	202	1	1	0.0033528	0.0048
Exp	Brooks54	R3	202	2	1	0.0064008	0.00189434
Exp	Brooks54	R3	202	3	1	0.0094488	0.00104906
Exp	Brooks54	R3	202	4	1	0.0185928	0.000324528
Exp	Brooks54	R3	202	5	1	0.0368808	6.26415e-05
Exp	Brooks54	R3	202	6	1	0.0612648	9.0566e-06
Exp	Brooks54	R3	202	7	1	0.0704088	5.28302e-06
Exp	Brooks54	R4	203	1	1	0.0036576	0.00684151
Exp	Brooks54	R4	203	2	1	0.0051816	0.00444906
Exp	Brooks54	R4	203	3	1	0.0082296	0.00253585
Exp	Brooks54	R4	203	4	1	0.0173736	0.000849057
Exp	Brooks54	R4	203	5	1	0.0356616	0.000191698
Exp	Brooks54	R4	203	6	1	0.0478536	2.90566e-05
Exp	Brooks54	R4	203	7	1	0.0661416	1.62264e-05
Exp	Brooks54	R6	204	1	1	0.0033528	0.00630189
Exp	Brooks54	R6	204	2	1	0.0048768	0.00415094
Exp	Brooks54	R6	204	3	1	0.0079248	0.00172075
Exp	Brooks54	R6	204	4	1	0.0124968	0.000769811
Exp	Brooks54	R6	204	5	1	0.0185928	0.000369811
Exp	Brooks54	R6	204	6	1	0.0307848	8.56604e-05
Exp	Brooks54	R6	204	7	1	0.0429768	4.22642e-05
Exp	Brooks54	R6	204	8	1	0.0490728	2.03774e-05
Exp	Brooks54	R7	205	1	1	0.0033528	0.0070566
Exp	Brooks54	R7	205	2	1	0.0048768	0.00484906
Exp	Brooks54	R7	205	3	1	0.0064008	0.00197358
Exp	Brooks54	R7	205	4	1	0.0094488	0.00113585
Exp	Brooks54	R7	205	5	1	0.0185928	0.000226415
Exp	Brooks54	R7	205	6	1	0.0368808	3.4717e-05
Exp	Brooks54	R7	205	7	1	0.0612648	3.77358e-06
Exp	Brooks54	R21	206	1	1	0.0033528	0.0107547
Exp	Brooks54	R21	206	2	1	0.0048768	0.00796226
Exp	Brooks54	R21	206	3	1	0.0064008	0.00686792
Exp	Brooks54	R21	206	4	1	0.0094488	0.00490566
Exp	Brooks54	R21	206	5	1	0.0185928	0.00250943
Exp	Brooks54	R21	206	6	1	0.0307848	0.00110943
Exp	Brooks54	R21	206	7	1	0.0490728	0.00029434
Exp	Brooks54	R21	206	8	1	0.0643128	7.16981e-05
Exp	Brooks54	R29	207	1	1	0.0204216	0.00886792
Exp	Brooks54	R29	207	2	1	0.0219456	0.00667925
Exp	Brooks54	R29	207	3	1	0.0234696	0.00558491
Exp	Brooks54	R29	207	4	1	0.0265176	0.00418868
Exp	Brooks54	R29	207	5	1	0.0356616	0.00208679
Exp	Brooks54	R29	207	6	1	0.0478536	0.00103019
Exp	Brooks54	R29	207	7	1	0.0661416	0.000296981
Exp	Brooks54	R29	207	8	1	0.0844296	3.88679e-05
Exp	Cellino98	R1	208	1	1	0.006	0.00929057
Exp	Cellino98	R1	208	2	1	0.009	0.0045434
Exp	Cellino98	R1	208	3	1	0.012	0.00151321
Exp	Cellino98	R1	208	4	1	0.015	0.00085283
Exp	Cellino98	R1	208	5	1	0.018	0.000558491
Exp	Cellino98	R1	208	6	1	0.021	0.000532075
Exp	Cellino98	R1	208	7	1	0.024	0.000366038
Exp	Cellino98	R1	208	8	1	0.03	0.000392453
Exp	Cellino98	R1	208	9	1	0.06	0.000211321
Exp	Cellino98	R1	208	10	1	0.084	8.67925e-05
Exp	Cellino98	R1	208	11	1	0.108	3.39623e-05
Exp	Cellino98	R1	208	12	1	0.114	3.01887e-05
Exp	Cellino98	R2	209	1	1	0.006	0.0108
Exp	Cellino98	R2	209	2	1	0.009	0.00812075
Exp	Cellino98	R2	209	3	1	0.012	0.00496226
Exp	Cellino98	R2	209	4	1	0.015	0.00213962
Exp	Cellino98	R2	209	5	1	0.018	0.0011283
Exp	Cellino98	R2	209	6	1	0.021	0.000845283
Exp	Cellino98	R2	209	7	1	0.024	0.000558491
Exp	Cellino98	R2	209	8	1	0.03	0.000388679
Exp	Cellino98	R2	209	9	1	0.06	0.000143396
Exp	Cellino98	R2	209	10	1	0.084	6.03774e-05
Exp	Cellino98	R2	209	11	1	0.108	4.15094e-05
Exp	Cellino98	R2	209	12	1	0.114	1.88679e-05
Exp	Cellino98	R3	210	1	1	0.006	0.0119321
Exp	Cellino98	R3	210	2	1	0.009	0.0084717
Exp	Cellino98	R3	210	3	1	0.012	0.0046566
Exp	Cellino98	R3	210	4	1	0.015	0.00188679
Exp	Cellino98	R3	210	5	1	0.018	0.000932075
Exp	Cellino98	R3	210	6	1	0.021	0.000792453
Exp	Cellino98	R3	210	7	1	0.024	0.000581132
Exp	Cellino98	R3	210	8	1	0.03	0.0004
Exp	Cellino98	R3	210	9	1	0.06	0.000150943
Exp	Cellino98	R3	210	10	1	0.084	7.92453e-05
Exp	Cellino98	R3	210	11	1	0.108	2.64151e-05
Exp	Cellino98	R3	210	12	1	0.114	1.88679e-05
Exp	Cellino98	R4	211	1	1	0.006	0.0148415
Exp	Cellino98	R4	211	2	1	0.009	0.00863019
Exp	Cellino98	R4	211	3	1	0.012	0.00368302
Exp	Cellino98	R4	211	4	1	0.015	0.00187925
Exp	Cellino98	R4	211	5	1	0.018	0.00143774
Exp	Cellino98	R4	211	6	1	0.021	0.00111321
Exp	Cellino98	R4	211	7	1	0.024	0.000954717
Exp	Cellino98	R4	211	8	1	0.03	0.000732075
Exp	Cellino98	R4	211	9	1	0.06	0.000332075
Exp	Cellino98	R4	211	10	1	0.084	0.000173585
Exp	Cellino98	R4	211	11	1	0.108	9.43396e-05
Exp	Cellino98	R4	211	12	1	0.114	6.03774e-05
Exp	Cellino98	R5	212	1	1	0.006	0.0136
Exp	Cellino98	R5	212	2	1	0.009	0.00947547
Exp	Cellino98	R5	212	3	1	0.012	0.0048717
Exp	Cellino98	R5	212	4	1	0.015	0.00227547
Exp	Cellino98	R5	212	5	1	0.018	0.00101132
Exp	Cellino98	R5	212	6	1	0.021	0.000909434
Exp	Cellino98	R5	212	7	1	0.024	0.000841509
Exp	Cellino98	R5	212	8	1	0.03	0.000381132
Exp	Cellino98	R5	212	9	1	0.06	0.000181132
Exp	Cellino98	R5	212	10	1	0.084	7.92453e-05
Exp	Cellino98	R5	212	11	1	0.108	3.77358e-05
Exp	Cellino98	R5	212	12	1	0.114	2.26415e-05
Exp	Cellino98	R6	213	1	1	0.006	0.0173811
Exp	Cellino98	R6	213	2	1	0.009	0.0117245
Exp	Cellino98	R6	213	3	1	0.012	0.00448679
Exp	Cellino98	R6	213	4	1	0.015	0.00250943
Exp	Cellino98	R6	213	5	1	0.018	0.00180755
Exp	Cellino98	R6	213	6	1	0.021	0.00122264
Exp	Cellino98	R6	213	7	1	0.024	0.00115472
Exp	Cellino98	R6	213	8	1	0.03	0.000803774
Exp	Cellino98	R6	213	9	1	0.06	0.000441509
Exp	Cellino98	R6	213	10	1	0.084	0.000207547
Exp	Cellino98	R6	213	11	1	0.108	0.000113208
Exp	Cellino98	R6	213	12	1	0.114	8.67925e-05
Exp	Cellino98	R7	214	1	1	0.006	0.0186453
Exp	Cellino98	R7	214	2	1	0.009	0.013483
Exp	Cellino98	R7	214	3	1	0.012	0.00675094
Exp	Cellino98	R7	214	4	1	0.015	0.00372453
Exp	Cellino98	R7	214	5	1	0.018	0.00176604
Exp	Cellino98	R7	214	6	1	0.021	0.00127547
Exp	Cellino98	R7	214	7	1	0.024	0.000981132
Exp	Cellino98	R7	214	8	1	0.03	0.000766038
Exp	Cellino98	R7	214	9	1	0.06	0.000279245
Exp	Cellino98	R7	214	10	1	0.084	0.000139623
Exp	Cellino98	R7	214	11	1	0.108	7.16981e-05
Exp	Cellino98	R7	214	12	1	0.114	4.15094e-05
Exp	Cellino98	R8	215	1	1	0.006	0.0186453
Exp	Cellino98	R8	215	2	1	0.009	0.013483
Exp	Cellino98	R8	215	3	1	0.012	0.00675094
Exp	Cellino98	R8	215	4	1	0.015	0.00372453
Exp	Cellino98	R8	215	5	1	0.018	0.00176604
Exp	Cellino98	R8	215	6	1	0.021	0.00127547
Exp	Cellino98	R8	215	7	1	0.024	0.000981132
Exp	Cellino98	R8	215	8	1	0.03	0.000766038
Exp	Cellino98	R8	215	9	1	0.06	0.000279245
Exp	Cellino98	R8	215	10	1	0.084	0.000139623
Exp	Cellino98	R8	215	11	1	0.108	7.16981e-05
Exp	Cellino98	R8	215	12	1	0.114	4.15094e-05
Exp	Cellino98	R9	216	1	1	0.006	0.0191774
Exp	Cellino98	R9	216	2	1	0.009	0.0138377
Exp	Cellino98	R9	216	3	1	0.012	0.00788302
Exp	Cellino98	R9	216	4	1	0.015	0.00423396
Exp	Cellino98	R9	216	5	1	0.018	0.00198491
Exp	Cellino98	R9	216	6	1	0.021	0.00156226
Exp	Cellino98	R9	216	7	1	0.024	0.00120377
Exp	Cellino98	R9	216	8	1	0.03	0.000784906
Exp	Cellino98	R9	216	9	1	0.06	0.000362264
Exp	Cellino98	R9	216	10	1	0.084	0.000196226
Exp	Cellino98	R9	216	11	1	0.108	7.92453e-05
Exp	Cellino98	R9	216	12	1	0.114	6.41509e-05
Exp	Cellino98	R10	217	1	1	0.006	0.018883
Exp	Cellino98	R10	217	2	1	0.009	0.0159736
Exp	Cellino98	R10	217	3	1	0.012	0.00682642
Exp	Cellino98	R10	217	4	1	0.015	0.0034566
Exp	Cellino98	R10	217	5	1	0.018	0.00301509
Exp	Cellino98	R10	217	6	1	0.021	0.00230566
Exp	Cellino98	R10	217	7	1	0.024	0.0022566
Exp	Cellino98	R10	217	8	1	0.03	0.00170189
Exp	Cellino98	R10	217	9	1	0.06	0.000833962
Exp	Cellino98	R10	217	10	1	0.084	0.000532075
Exp	Cellino98	R10	217	11	1	0.108	0.000335849
Exp	Cellino98	R10	217	12	1	0.114	0.000286792
Exp	Cellino98	R11	218	1	1	0.006	0.000890566
Exp	Cellino98	R11	218	2	1	0.009	0.000618868
Exp	Cellino98	R11	218	3	1	0.012	0.00030566
Exp	Cellino98	R11	218	4	1	0.015	0.000154717
Exp	Cellino98	R11	218	5	1	0.018	0.00010566
Exp	Cellino98	R11	218	6	1	0.021	6.79245e-05
Exp	Cellino98	R11	218	7	1	0.024	6.03774e-05
Exp	Cellino98	R11	218	8	1	0.03	5.66038e-05
Exp	Cellino98	R11	218	9	1	0.06	2.26415e-05
Exp	Cellino98	R11	218	10	1	0.084	1.13208e-05
Exp	Cellino98	R11	218	11	1	0.108	7.54717e-06
Exp	Cellino98	R11	218	12	1	0.114	7.54717e-06
Exp	Cellino98	R12	219	1	1	0.006	0.00804151
Exp	Cellino98	R12	219	2	1	0.009	0.00458113
Exp	Cellino98	R12	219	3	1	0.012	0.00164906
Exp	Cellino98	R12	219	4	1	0.015	0.000456604
Exp	Cellino98	R12	219	5	1	0.018	0.000237736
Exp	Cellino98	R12	219	6	1	0.021	0.000143396
Exp	Cellino98	R12	219	7	1	0.024	0.00010566
Exp	Cellino98	R12	219	8	1	0.03	9.81132e-05
Exp	Cellino98	R12	219	9	1	0.06	1.88679e-05
Exp	Cellino98	R12	219	10	1	0.084	1.13208e-05
Exp	Cellino98	R12	219	11	1	0.108	7.54717e-06
Exp	Cellino98	R12	219	12	1	0.114	3.77358e-06
Exp	Cellino98	R13	220	1	1	0.006	0.0105925
Exp	Cellino98	R13	220	2	1	0.009	0.00803774
Exp	Cellino98	R13	220	3	1	0.012	0.00272075
Exp	Cellino98	R13	220	4	1	0.015	0.00069434
Exp	Cellino98	R13	220	5	1	0.018	0.000358491
Exp	Cellino98	R13	220	6	1	0.021	0.000203774
Exp	Cellino98	R13	220	7	1	0.024	0.000173585
Exp	Cellino98	R13	220	8	1	0.03	0.000128302
Exp	Cellino98	R13	220	9	1	0.06	4.90566e-05
Exp	Cellino98	R13	220	10	1	0.084	3.39623e-05
Exp	Cellino98	R13	220	11	1	0.108	2.64151e-05
Exp	Cellino98	R13	220	12	1	0.114	3.01887e-05
Exp	Cellino98	R14	221	1	1	0.006	0.00934717
Exp	Cellino98	R14	221	2	1	0.009	0.00728679
Exp	Cellino98	R14	221	3	1	0.012	0.00215849
Exp	Cellino98	R14	221	4	1	0.015	0.000611321
Exp	Cellino98	R14	221	5	1	0.018	0.000226415
Exp	Cellino98	R14	221	6	1	0.021	0.00025283
Exp	Cellino98	R14	221	7	1	0.024	0.000184906
Exp	Cellino98	R14	221	8	1	0.03	0.000128302
Exp	Cellino98	R14	221	9	1	0.06	4.15094e-05
Exp	Cellino98	R14	221	10	1	0.084	2.64151e-05
Exp	Cellino98	R14	221	11	1	0.108	7.54717e-06
Exp	Cellino98	R14	221	12	1	0.114	7.54717e-06
Exp	Cellino98	R15	222	1	1	0.006	0.00878868
Exp	Cellino98	R15	222	2	1	0.009	0.00516226
Exp	Cellino98	R15	222	3	1	0.012	0.00293585
Exp	Cellino98	R15	222	4	1	0.015	0.000815094
Exp	Cellino98	R15	222	5	1	0.018	0.000430189
Exp	Cellino98	R15	222	6	1	0.021	0.000283019
Exp	Cellino98	R15	222	7	1	0.024	0.000192453
Exp	Cellino98	R15	222	8	1	0.03	0.000150943
Exp	Cellino98	R15	222	9	1	0.06	5.66038e-05
Exp	Cellino98	R15	222	10	1	0.084	3.39623e-05
Exp	Cellino98	R15	222	11	1	0.108	1.13208e-05
Exp	Cellino98	R15	222	12	1	0.114	1.13208e-05
Exp	Cellino98	R16	223	1	1	0.006	0.012966
Exp	Cellino98	R16	223	2	1	0.009	0.00764906
Exp	Cellino98	R16	223	3	1	0.012	0.00381132
Exp	Cellino98	R16	223	4	1	0.015	0.00167547
Exp	Cellino98	R16	223	5	1	0.018	0.000649057
Exp	Cellino98	R16	223	6	1	0.021	0.000418868
Exp	Cellino98	R16	223	7	1	0.024	0.00030566
Exp	Cellino98	R16	223	8	1	0.03	0.000181132
Exp	Cellino98	R16	223	9	1	0.06	6.79245e-05
Exp	Cellino98	R16	223	10	1	0.084	3.01887e-05
Exp	Cellino98	R16	223	11	1	0.108	1.88679e-05
Exp	Cellino98	R16	223	12	1	0.114	1.88679e-05
Exp	Cellino98	R17	224	1	1	0.006	0.012766
Exp	Cellino98	R17	224	2	1	0.009	0.0087434
Exp	Cellino98	R17	224	3	1	0.012	0.00370566
Exp	Cellino98	R17	224	4	1	0.015	0.00175094
Exp	Cellino98	R17	224	5	1	0.018	0.000803774
Exp	Cellino98	R17	224	6	1	0.021	0.000388679
Exp	Cellino98	R17	224	7	1	0.024	0.000350943
Exp	Cellino98	R17	224	8	1	0.03	0.000237736
Exp	Cellino98	R17	224	9	1	0.06	6.41509e-05
Exp	Cellino98	R17	224	10	1	0.084	4.15094e-05
Exp	Cellino98	R17	224	11	1	0.108	1.88679e-05
Exp	Cellino98	R17	224	12	1	0.114	1.50943e-05
Exp	Lyn86	R1	225	1	1	0.0041925	0.00377358
Exp	Lyn86	R1	225	2	1	0.0059985	0.00214717
Exp	Lyn86	R1	225	3	1	0.0070305	0.0014717
Exp	Lyn86	R1	225	4	1	0.007998	0.00121132
Exp	Lyn86	R1	225	5	1	0.010449	0.000830189
Exp	Lyn86	R1	225	6	1	0.011481	0.000728302
Exp	Lyn86	R1	225	7	1	0.0134805	0.000513208
Exp	Lyn86	R1	225	8	1	0.017028	0.000354717
Exp	Lyn86	R1	225	9	1	0.021027	0.000241887
Exp	Lyn86	R1	225	10	1	0.0254775	0.00017283
Exp	Lyn86	R1	225	11	1	0.032508	9.24528e-05
Exp	Lyn86	R1	225	12	1	0.03999	5.43396e-05
Exp	Lyn86	R1	225	13	1	0.0459885	3.43396e-05
Exp	Lyn86	R1	225	14	1	0.053019	2e-05
Exp	Lyn86	R1	225	15	1	0.059985	1.18868e-05
Exp	Lyn86	R2	226	1	1	0.0046872	0.00234717
Exp	Lyn86	R2	226	2	1	0.0057288	0.00156981
Exp	Lyn86	R2	226	3	1	0.0063798	0.000924528
Exp	Lyn86	R2	226	4	1	0.0080073	0.000743396
Exp	Lyn86	R2	226	5	1	0.0089187	0.00054717
Exp	Lyn86	R2	226	6	1	0.0110019	0.000362264
Exp	Lyn86	R2	226	7	1	0.0121737	0.000260377
Exp	Lyn86	R2	226	8	1	0.0150381	0.000169811
Exp	Lyn86	R2	226	9	1	0.0167307	0.000135849
Exp	Lyn86	R2	226	10	1	0.0200508	9.24528e-05
Exp	Lyn86	R2	226	11	1	0.0221991	7.28302e-05
Exp	Lyn86	R2	226	12	1	0.02604	5.13208e-05
Exp	Lyn86	R2	226	13	1	0.0287091	4.33962e-05
Exp	Lyn86	R2	226	14	1	0.0330708	2.86792e-05
Exp	Lyn86	R2	226	15	1	0.0361956	2.49057e-05
Exp	Lyn86	R2	226	16	1	0.0415989	1.69811e-05
Exp	Lyn86	R2	226	17	1	0.0457002	1.20755e-05
Exp	Lyn86	R2	226	18	1	0.0505827	8.30189e-06
Exp	Lyn86	R2	226	19	1	0.054684	6.41509e-06
Exp	Lyn86	R2	226	20	1	0.0600873	4.18868e-06
Exp	Lyn86	R3	227	1	1	0.0032046	0.00539623
Exp	Lyn86	R3	227	2	1	0.003924	0.00323396
Exp	Lyn86	R3	227	3	1	0.0047088	0.00163774
Exp	Lyn86	R3	227	4	1	0.0053628	0.00130566
Exp	Lyn86	R3	227	5	1	0.006213	0.000675472
Exp	Lyn86	R3	227	6	1	0.0069978	0.000664151
Exp	Lyn86	R3	227	7	1	0.008175	0.000381132
Exp	Lyn86	R3	227	8	1	0.0093522	0.000256604
Exp	Lyn86	R3	227	9	1	0.0102024	0.000197736
Exp	Lyn86	R3	227	10	1	0.0111834	0.000138868
Exp	Lyn86	R3	227	11	1	0.0128838	0.000101887
Exp	Lyn86	R3	227	12	1	0.0138648	8.64151e-05
Exp	Lyn86	R3	227	13	1	0.0151728	5.69811e-05
Exp	Lyn86	R3	227	14	1	0.0171348	3.52075e-05
Exp	Lyn86	R3	227	15	1	0.01962	2.22642e-05
Exp	Lyn86	R3	227	16	1	0.0221052	1.88679e-05
Exp	Lyn86	R3	227	17	1	0.0246558	1.13208e-05
Exp	Lyn86	R3	227	18	1	0.0275988	7.54717e-06
Exp	Lyn86	R3	227	19	1	0.0306072	5.4717e-06
Exp	Lyn86	R3	227	20	1	0.0336156	3.32075e-06
Exp	Lyn86	R3	227	21	1	0.0370818	1.92453e-06
Exp	Lyn86	R3	227	22	1	0.0400902	1.81132e-06
Exp	Lyn86	R3	227	23	1	0.0435564	9.24528e-07
Exp	Lyn86	R3	227	24	1	0.0465648	6.41509e-07
Exp	Lyn86	R3	227	25	1	0.0505542	4.15094e-07
Exp	Coleman86	R20	228	1	1	0.006	0.023
Exp	Coleman86	R20	228	2	1	0.012	0.012
Exp	Coleman86	R20	228	3	1	0.018	0.0082
Exp	Coleman86	R20	228	4	1	0.024	0.0061
Exp	Coleman86	R20	228	5	1	0.03	0.0048
Exp	Coleman86	R20	228	6	1	0.046	0.0033
Exp	Coleman86	R20	228	7	1	0.069	0.0026
Exp	Coleman86	R20	228	8	1	0.091	0.0016
Exp	Coleman86	R20	228	9	1	0.122	0.00076
Exp	Coleman86	R20	228	10	1	0.137	0.0004
Exp	Coleman86	R20	228	11	1	0.152	0.0002
Exp	Coleman86	R20	228	12	1	0.162	0.00011
Exp	Coleman86	R31	229	1	1	0.006	0.012
Exp	Coleman86	R31	229	2	1	0.012	0.0063
Exp	Coleman86	R31	229	3	1	0.018	0.004
Exp	Coleman86	R31	229	4	1	0.024	0.003
Exp	Coleman86	R31	229	5	1	0.03	0.0024
Exp	Coleman86	R31	229	6	1	0.046	0.0016
Exp	Coleman86	R31	229	7	1	0.069	0.0012
Exp	Coleman86	R31	229	8	1	0.091	0.00077
Exp	Coleman86	R31	229	9	1	0.122	0.00041
Exp	Coleman86	R31	229	10	1	0.137	0.0003
Exp	Coleman86	R31	229	11	1	0.152	0.0002
Exp	Coleman86	R31	229	12	1	0.162	0.00015
Exp	Coleman86	R40	230	1	1	0.006	0.0026
Exp	Coleman86	R40	230	2	1	0.012	0.0011
Exp	Coleman86	R40	230	3	1	0.018	0.00064
Exp	Coleman86	R40	230	4	1	0.024	0.00046
Exp	Coleman86	R40	230	5	1	0.03	0.00042
Exp	Coleman86	R40	230	6	1	0.046	0.0003
Exp	Coleman86	R40	230	7	1	0.069	0.00025
Exp	Coleman86	R40	230	8	1	0.091	0.00016
Exp	Coleman86	R40	230	9	1	0.122	0.00012
Exp	Coleman86	R40	230	10	1	0.137	9.7e-05
Exp	Coleman86	R40	230	11	1	0.152	8e-05
Exp	Coleman86	R40	230	12	1	0.162	6.9e-05
Exp	Sumer96	R142	231	1	1	0.006	0.0364
Exp	Sumer96	R142	231	2	1	0.008	0.0288
Exp	Sumer96	R142	231	3	1	0.01	0.0237
Exp	Sumer96	R142	231	4	1	0.016	0.0133
Exp	Sumer96	R142	231	5	1	0.026	0.01
Exp	Sumer96	R142	231	6	1	0.08	0
Exp	Sumer96	R150	232	1	1	0.004	0.0828
Exp	Sumer96	R150	232	2	1	0.006	0.0608
Exp	Sumer96	R150	232	3	1	0.008	0.0519019
Exp	Sumer96	R150	232	4	1	0.01	0.0364
Exp	Sumer96	R150	232	5	1	0.016	0.0237019
Exp	Sumer96	R150	232	6	1	0.026	0.012
Exp	Sumer96	R150	232	7	1	0.08	0
Exp	Sumer96	R155	233	1	1	0.005	0.1282
Exp	Sumer96	R155	233	2	1	0.007	0.103102
Exp	Sumer96	R155	233	3	1	0.009	0.0892
Exp	Sumer96	R155	233	4	1	0.011	0.0813019
Exp	Sumer96	R155	233	5	1	0.013	0.0631019
Exp	Sumer96	R155	233	6	1	0.029	0.025
Exp	Sumer96	R155	233	7	1	0.08	0
River	miss	P52	234	1	43	1.507	8.88349e-05	0	0.00877193	0.00986842	0.00986842	0.0120614	0.0131579	0.0131579	0.0153509	0.0175439	0.0186404	0.0208333	0.0252193	0.0285088	0.0350877	0.0427632	0.0515351	0.0592105	0.066886	0.0701754	0.0723684	0.0690789	0.064693	0.0548246	0.0427632	0.0317982	0.0241228	0.0230263	0.0197368	0.0175439	0.0131579	0.00986842	0.00657895	0.00438596	0.00548246	0.00548246	0.00438596	0.00328947	0.00328947	0.00219298	0.00328947	0	0
River	miss	P52	234	2	43	4.521	3.42077e-05	0	0.0106383	0.0106383	0.0118203	0.0130024	0.0141844	0.0153664	0.0177305	0.0212766	0.0236407	0.0283688	0.0307329	0.035461	0.0390071	0.0425532	0.0460993	0.0496454	0.0520095	0.0543735	0.0567376	0.0567376	0.0555556	0.0508274	0.0460993	0.0378251	0.0283688	0.0224586	0.0189125	0.0177305	0.0153664	0.0141844	0.0130024	0.00945626	0.0106383	0.00945626	0.0070922	0.0070922	0.00591017	0	0	0	0
River	miss	P52	234	3	43	7.535	2.09155e-05	0	0.0165929	0.0188053	0.0210177	0.0210177	0.0232301	0.0243363	0.0243363	0.0254425	0.0265487	0.0265487	0.0287611	0.0309735	0.0376106	0.0475664	0.0597345	0.0719027	0.0807522	0.0840708	0.0818584	0.0730088	0.0597345	0.0431416	0.0243363	0.0121681	0.00995575	0.00774336	0.00663717	0.00442478	0.00331858	0.00221239	0.00110619	0.00110619	0	0	0	0	0	0	0	0	0
River	miss	P52	234	4	43	10.549	1.45606e-05	0	0.0447427	0.0458613	0.0447427	0.0436242	0.0436242	0.0436242	0.0436242	0.0469799	0.0458613	0.0469799	0.0447427	0.0425056	0.0380313	0.0346756	0.0302013	0.0257271	0.0212528	0.0167785	0.0134228	0.00894855	0.00671141	0.00559284	0.0033557	0.00447427	0.00223714	0.0033557	0.00223714	0.00223714	0.00111857	0.00111857	0.00111857	0	0	0	0	0	0	0	0	0	0
River	miss	P52	234	5	43	13.563	1.07191e-05	0	0.021978	0.0241758	0.0252747	0.0274725	0.0296703	0.0318681	0.0340659	0.0362637	0.0373626	0.0384615	0.0406593	0.0406593	0.043956	0.0461538	0.0516484	0.0571429	0.0604396	0.0626374	0.0593407	0.0549451	0.0472527	0.0384615	0.0263736	0.0175824	0.010989	0.00769231	0.00769231	0.00659341	0.00549451	0.0043956	0.0032967	0	0	0	0	0	0	0	0	0	0
River	miss	P53	235	1	43	2.149	6.58507e-05	0	0.00936524	0.00936524	0.0114464	0.0114464	0.012487	0.012487	0.0135276	0.0145682	0.0156087	0.0156087	0.0187305	0.0218522	0.0291363	0.0395421	0.0530697	0.0665973	0.0780437	0.0832466	0.0842872	0.0801249	0.069719	0.0530697	0.0364204	0.0280957	0.0260146	0.0260146	0.0228928	0.0176899	0.0114464	0.0062435	0.00416233	0.00416233	0.00416233	0.00208117	0.00208117	0.00208117	0.00208117	0.00104058	0	0	0
River	miss	P53	235	2	43	6.447	2.44425e-05	0	0.0127389	0.014862	0.014862	0.0169851	0.0169851	0.0191083	0.0191083	0.0191083	0.0212314	0.0212314	0.022293	0.0265393	0.0329087	0.0424628	0.0562633	0.0679406	0.0785563	0.0838641	0.081741	0.0764331	0.0658174	0.0467091	0.0307856	0.0212314	0.0169851	0.0169851	0.014862	0.0106157	0.007431	0.00424628	0.00318471	0.00424628	0.00318471	0.00318471	0.00212314	0.00212314	0.00106157	0	0	0	0
River	miss	P53	235	3	43	10.745	1.42556e-05	0	0.0146444	0.0156904	0.0177824	0.0188285	0.0188285	0.0209205	0.0198745	0.0209205	0.0219665	0.0209205	0.0230126	0.0261506	0.0313808	0.042887	0.0575314	0.0721757	0.082636	0.0868201	0.0857741	0.0774059	0.0648536	0.0449791	0.0261506	0.0167364	0.0156904	0.0146444	0.0125523	0.00941423	0.00627615	0.00313808	0.00209205	0.00209205	0.00104603	0.00104603	0.00104603	0	0.00104603	0	0.00104603	0	0
River	miss	P53	235	4	43	15.043	9.31793e-06	0	0.0131004	0.0141921	0.0152838	0.0163755	0.0174672	0.0196507	0.0218341	0.0229258	0.0251092	0.0272926	0.029476	0.0338428	0.0382096	0.0436681	0.0502183	0.058952	0.0633188	0.0655022	0.0665939	0.0622271	0.0578603	0.0469432	0.0360262	0.0272926	0.0207424	0.018559	0.0174672	0.0163755	0.0131004	0.010917	0.00764192	0.00764192	0.00764192	0.00655022	0	0	0	0	0	0	0
River	miss	P53	235	5	43	19.341	6.27681e-06	0	0.0199336	0.021041	0.0232558	0.0254707	0.0276855	0.0287929	0.0321152	0.0332226	0.0354374	0.0365449	0.0387597	0.0431894	0.0465116	0.0531561	0.0586932	0.0631229	0.0664452	0.0631229	0.0609081	0.0542636	0.0442968	0.03433	0.0243632	0.0188261	0.0143965	0.0121816	0.00885936	0.0055371	0.00332226	0.00110742	0.00110742	0	0	0	0	0	0	0	0	0	0
River	miss	P54	236	1	43	3.238	4.61759e-05	0	0.0095037	0.0105597	0.0105597	0.0126716	0.0126716	0.0147835	0.0168955	0.0190074	0.0221753	0.0242872	0.0274551	0.030623	0.0337909	0.0369588	0.0390707	0.0422386	0.0443506	0.0454065	0.0475185	0.0485744	0.0496304	0.0464625	0.0443506	0.0380148	0.0337909	0.0295671	0.0263992	0.0253432	0.0232313	0.0221753	0.0190074	0.0158395	0.0137276	0.0126716	0.0126716	0.0095037	0.0063358	0.0063358	0.0063358	0.00527983	0.00422386
River	miss	P54	236	2	43	9.714	1.5977e-05	0	0.0116897	0.0138151	0.0138151	0.0159405	0.0170032	0.0191286	0.021254	0.0233794	0.0255048	0.0286929	0.031881	0.0340064	0.0382572	0.0403826	0.0446334	0.0478215	0.0499469	0.0520723	0.053135	0.0520723	0.0488842	0.0435707	0.0382572	0.0297556	0.0244421	0.021254	0.0180659	0.0180659	0.0159405	0.0148778	0.0127524	0.010627	0.010627	0.00956429	0.010627	0.00850159	0.00850159	0.00850159	0.0063762	0.0042508	0.0021254
River	miss	P54	236	3	43	16.19	8.37962e-06	0	0.0153483	0.0177096	0.0188902	0.0200708	0.0224321	0.0236128	0.0271547	0.0295159	0.0318772	0.0342385	0.0377804	0.0401417	0.042503	0.0460449	0.0484061	0.0507674	0.0543093	0.0543093	0.05549	0.0543093	0.0495868	0.0448642	0.0365998	0.0295159	0.0212515	0.0177096	0.0153483	0.0141677	0.012987	0.0118064	0.00826446	0.00708383	0.00590319	0	0	0	0	0	0	0	0
River	miss	P54	236	4	43	22.666	4.56766e-06	0	0.0157729	0.0168244	0.0178759	0.019979	0.022082	0.0231335	0.0262881	0.0273396	0.0304942	0.0325973	0.0347003	0.0378549	0.0389064	0.042061	0.0462671	0.0494217	0.0515247	0.0536278	0.0525762	0.0494217	0.044164	0.0378549	0.0304942	0.0252366	0.022082	0.0210305	0.022082	0.0231335	0.022082	0.0189274	0.0136698	0.0105152	0.00736067	0.00630915	0.0042061	0.00210305	0	0	0	0	0
River	miss	P54	236	5	43	29.142	2.05918e-06	0	0.0167038	0.0167038	0.018931	0.0200445	0.0222717	0.0244989	0.0267261	0.0289532	0.032294	0.0345212	0.0367483	0.0389755	0.0423163	0.0445434	0.0478842	0.0512249	0.0545657	0.0567929	0.0567929	0.0545657	0.0501114	0.0445434	0.0378619	0.0300668	0.0222717	0.018931	0.0178174	0.0155902	0.0122494	0.0100223	0.0077951	0.00668151	0	0	0	0	0	0	0	0	0
River	miss	P55	237	1	43	1.296	0.000100733	0	0.0116897	0.0116897	0.0138151	0.0138151	0.0148778	0.0170032	0.0170032	0.0180659	0.0191286	0.0201913	0.0223167	0.0255048	0.031881	0.0414453	0.053135	0.0658874	0.0754516	0.0797024	0.0786397	0.0754516	0.0648247	0.0510096	0.0340064	0.0244421	0.0223167	0.021254	0.0191286	0.0148778	0.010627	0.0063762	0.0053135	0.0042508	0.0053135	0.0042508	0.0021254	0.0021254	0.0010627	0	0	0	0
River	miss	P55	237	2	43	3.888	3.92349e-05	0	0.0116897	0.0116897	0.0138151	0.0138151	0.0148778	0.0170032	0.0170032	0.0180659	0.0191286	0.0201913	0.0223167	0.0255048	0.031881	0.0414453	0.053135	0.0658874	0.0754516	0.0797024	0.0786397	0.0754516	0.0648247	0.0510096	0.0340064	0.0244421	0.0223167	0.021254	0.0191286	0.0148778	0.010627	0.0063762	0.0053135	0.0042508	0.0053135	0.0042508	0.0021254	0.0021254	0.0010627	0	0	0	0
River	miss	P55	237	3	43	6.48	2.43204e-05	0	0.00931677	0.0113872	0.0113872	0.0124224	0.0134576	0.0144928	0.0165631	0.0175983	0.0196687	0.0207039	0.0238095	0.0279503	0.0331263	0.0403727	0.047619	0.0559006	0.0610766	0.0662526	0.0662526	0.0652174	0.0610766	0.052795	0.0445135	0.0351967	0.0300207	0.0289855	0.0269151	0.0227743	0.0186335	0.0113872	0.00828157	0.00517598	0.00517598	0.00414079	0.00414079	0.00207039	0.0010352	0.00207039	0	0.0010352	0
River	miss	P55	237	4	43	9.072	1.72172e-05	0	0.0176211	0.0176211	0.0198238	0.0209251	0.0231278	0.0242291	0.0264317	0.027533	0.0286344	0.0297357	0.0319383	0.034141	0.0385463	0.0451542	0.0550661	0.0638767	0.0704846	0.0737885	0.0704846	0.0660793	0.0561674	0.0440529	0.0297357	0.0187225	0.0132159	0.0132159	0.0110132	0.00991189	0.00770925	0.00550661	0.00550661	0	0	0	0	0	0	0	0	0	0
River	miss	P55	237	5	43	11.664	1.29436e-05	0	0.014333	0.014333	0.016538	0.0176406	0.0198456	0.0209482	0.0231533	0.0264609	0.0275634	0.030871	0.0330761	0.0363837	0.0396913	0.0441014	0.0496141	0.0551268	0.0584344	0.0606395	0.061742	0.0595369	0.0562293	0.0485116	0.0385888	0.0297685	0.0220507	0.0187431	0.0154355	0.0132304	0.00992282	0.00882029	0.00661521	0.00551268	0.00551268	0.00551268	0.00330761	0.00220507	0	0	0	0	0
River	miss	P56	238	1	43	1.772	7.75431e-05	0	0.0116897	0.0116897	0.0138151	0.0138151	0.0148778	0.0170032	0.0170032	0.0180659	0.0191286	0.0201913	0.0223167	0.0255048	0.031881	0.0414453	0.053135	0.0658874	0.0754516	0.0797024	0.0786397	0.0754516	0.0648247	0.0510096	0.0340064	0.0244421	0.0223167	0.021254	0.0191286	0.0148778	0.010627	0.0063762	0.0053135	0.0042508	0.0053135	0.0042508	0.0021254	0.0021254	0.0010627	0	0	0	0
River	miss	P56	238	2	43	5.316	2.94212e-05	0	0.00846561	0.00740741	0.00952381	0.00952381	0.0116402	0.0116402	0.0137566	0.0148148	0.0169312	0.0190476	0.0232804	0.026455	0.0328042	0.0380952	0.0444444	0.0507937	0.0560847	0.0603175	0.0634921	0.0634921	0.0624339	0.0571429	0.0497354	0.0433862	0.0359788	0.0338624	0.0306878	0.026455	0.0222222	0.015873	0.00952381	0.00634921	0.00529101	0.0042328	0.0042328	0.0031746	0.0031746	0.0021164	0.0021164	0	0
River	miss	P56	238	3	43	8.86	1.76607e-05	0	0.00931677	0.0113872	0.0113872	0.0124224	0.0134576	0.0144928	0.0165631	0.0175983	0.0196687	0.0207039	0.0238095	0.0279503	0.0331263	0.0403727	0.047619	0.0559006	0.0610766	0.0662526	0.0662526	0.0652174	0.0610766	0.052795	0.0445135	0.0351967	0.0300207	0.0289855	0.0269151	0.0227743	0.0186335	0.0113872	0.00828157	0.00517598	0.00517598	0.00414079	0.00414079	0.00207039	0.0010352	0.00207039	0	0.0010352	0
River	miss	P56	238	4	43	12.404	1.20084e-05	0	0.0176211	0.0176211	0.0198238	0.0209251	0.0231278	0.0242291	0.0264317	0.027533	0.0286344	0.0297357	0.0319383	0.034141	0.0385463	0.0451542	0.0550661	0.0638767	0.0704846	0.0737885	0.0704846	0.0660793	0.0561674	0.0440529	0.0297357	0.0187225	0.0132159	0.0132159	0.0110132	0.00991189	0.00770925	0.00550661	0.00550661	0	0	0	0	0	0	0	0	0	0
River	miss	P56	238	5	43	15.948	8.56837e-06	0	0.014333	0.014333	0.016538	0.0176406	0.0198456	0.0209482	0.0231533	0.0264609	0.0275634	0.030871	0.0330761	0.0363837	0.0396913	0.0441014	0.0496141	0.0551268	0.0584344	0.0606395	0.061742	0.0595369	0.0562293	0.0485116	0.0385888	0.0297685	0.0220507	0.0187431	0.0154355	0.0132304	0.00992282	0.00882029	0.00661521	0.00551268	0.00551268	0.00551268	0.00330761	0.00220507	0	0	0	0	0
River	miss	P57	239	1	43	2.783	5.27191e-05	0	0.0104932	0.0115425	0.0125918	0.0136411	0.0136411	0.0146905	0.0146905	0.0157398	0.0157398	0.0167891	0.0188877	0.0220357	0.0304302	0.0409234	0.0577125	0.0755509	0.0870934	0.0933893	0.0933893	0.0870934	0.0734523	0.0503673	0.0304302	0.0220357	0.0188877	0.0188877	0.0157398	0.0115425	0.00734523	0.00314795	0.00209864	0	0	0	0	0	0	0	0	0	0
River	miss	P57	239	2	43	8.349	1.88094e-05	0	0.0147835	0.0168955	0.0179514	0.0190074	0.0190074	0.0211193	0.0200634	0.0221753	0.0221753	0.0221753	0.0242872	0.0274551	0.0337909	0.0454065	0.061246	0.0760296	0.0865892	0.0908131	0.0887012	0.0802534	0.0644139	0.0432946	0.0232313	0.0126716	0.0105597	0.0105597	0.0095037	0.0063358	0.00527983	0.00211193	0.00105597	0.00105597	0	0	0	0	0	0	0	0	0
River	miss	P57	239	3	43	13.915	1.03634e-05	0	0.0192513	0.0203209	0.0213904	0.0235294	0.0245989	0.0256684	0.026738	0.0278075	0.0278075	0.0278075	0.028877	0.0320856	0.0363636	0.0459893	0.057754	0.0695187	0.0780749	0.0802139	0.0780749	0.0695187	0.057754	0.0406417	0.0235294	0.0128342	0.00962567	0.00962567	0.00748663	0.00641711	0.00534759	0.00213904	0.00213904	0.00106952	0	0	0	0	0	0	0	0	0
River	miss	P57	239	4	43	19.481	6.19602e-06	0	0.015855	0.0169875	0.01812	0.0192525	0.0192525	0.0215176	0.0215176	0.0226501	0.0237826	0.0237826	0.0249151	0.0294451	0.0362401	0.0453001	0.0600227	0.0736127	0.0826727	0.0872027	0.0849377	0.0781427	0.0645527	0.0464326	0.0271801	0.015855	0.0124575	0.011325	0.00906002	0.00792752	0	0	0	0	0	0	0	0	0	0	0	0	0
River	miss	P57	239	5	43	25.047	3.55197e-06	0	0.0164654	0.0175631	0.0197585	0.0208562	0.0230516	0.0230516	0.025247	0.025247	0.0274424	0.0285401	0.0285401	0.0329308	0.0373216	0.0461032	0.0581778	0.0691548	0.0768386	0.079034	0.0768386	0.0702525	0.0592755	0.0439078	0.0274424	0.0164654	0.0120746	0.00987925	0.00878156	0.00768386	0.00548847	0.00439078	0.00219539	0	0	0	0	0	0	0	0	0	0
River	miss	P58	240	1	43	2.891	5.10004e-05	0	0.00944386	0.0104932	0.0115425	0.0115425	0.0136411	0.0136411	0.0157398	0.0167891	0.0188877	0.019937	0.0220357	0.0262329	0.0314795	0.0398741	0.0493179	0.0577125	0.066107	0.069255	0.0713536	0.0703043	0.0650577	0.0556139	0.043022	0.0346275	0.0314795	0.0283316	0.0272823	0.0209864	0.0167891	0.0104932	0.00524659	0.00524659	0.00419727	0.00314795	0.00209864	0.00104932	0	0	0	0	0
River	miss	P58	240	2	43	8.673	1.80674e-05	0	0.00952381	0.010582	0.0116402	0.0116402	0.0137566	0.0148148	0.0169312	0.0179894	0.021164	0.0222222	0.026455	0.0306878	0.0349206	0.0402116	0.0465608	0.0518519	0.0571429	0.0613757	0.0624339	0.0624339	0.0592593	0.0539683	0.047619	0.0380952	0.0328042	0.0296296	0.026455	0.0243386	0.0201058	0.0148148	0.00952381	0.00634921	0.00634921	0.0042328	0.0021164	0	0	0	0	0	0
River	miss	P58	240	3	43	14.455	9.84603e-06	0	0.0169492	0.0190678	0.0201271	0.0222458	0.0222458	0.0243644	0.0254237	0.0264831	0.0275424	0.0286017	0.0286017	0.0307203	0.0349576	0.0444915	0.0550847	0.065678	0.0741525	0.0762712	0.0752119	0.0688559	0.059322	0.0444915	0.029661	0.0180085	0.0148305	0.0127119	0.0116525	0.00847458	0.00529661	0.00317797	0.00211864	0.00105932	0.00105932	0.00105932	0	0	0	0	0	0	0
River	miss	P58	240	4	43	20.237	5.77476e-06	0	0.0180467	0.0201699	0.0212314	0.0233546	0.0244161	0.0254777	0.0276008	0.0286624	0.029724	0.029724	0.0307856	0.0318471	0.0360934	0.044586	0.0552017	0.0658174	0.0721868	0.0753715	0.0721868	0.066879	0.0573248	0.0414013	0.0265393	0.014862	0.0106157	0.0106157	0.00955414	0.007431	0.00530786	0.00318471	0.00212314	0.00212314	0.00106157	0.00106157	0.00106157	0.00106157	0.00106157	0.00106157	0	0.00106157	0.00106157
River	miss	P58	240	5	43	26.019	3.1735e-06	0	0.0215054	0.0247312	0.0247312	0.027957	0.0301075	0.0311828	0.0333333	0.0344086	0.0365591	0.0354839	0.0376344	0.0376344	0.0408602	0.0451613	0.0537634	0.0623656	0.0666667	0.0677419	0.0655914	0.0591398	0.0505376	0.0376344	0.0236559	0.0139785	0.00752688	0.00645161	0.00645161	0.00430108	0.00322581	0.00215054	0.00215054	0.00215054	0.00322581	0	0	0	0	0	0	0	0
River	miss	P59	241	1	43	2.088	6.74854e-05	0	0.0063358	0.0063358	0.00739176	0.00844773	0.0095037	0.0095037	0.0126716	0.0137276	0.0158395	0.0179514	0.0221753	0.0242872	0.0285111	0.031679	0.0359029	0.0380148	0.0422386	0.0443506	0.0464625	0.0485744	0.0506864	0.0506864	0.0485744	0.0464625	0.0443506	0.0411827	0.0401267	0.0380148	0.0369588	0.032735	0.0253432	0.0190074	0.0158395	0.0137276	0.0116156	0.0063358	0.00527983	0.0031679	0	0	0
River	miss	P59	241	2	43	6.264	2.51403e-05	0	0.00831601	0.00935551	0.010395	0.010395	0.012474	0.012474	0.0155925	0.016632	0.0197505	0.022869	0.024948	0.029106	0.0322245	0.035343	0.039501	0.043659	0.045738	0.047817	0.0509356	0.0509356	0.0509356	0.047817	0.045738	0.04158	0.0363825	0.033264	0.031185	0.031185	0.0280665	0.024948	0.018711	0.014553	0.0114345	0.0114345	0.00935551	0.00623701	0.00519751	0.004158	0.0031185	0.0031185	0.002079
River	miss	P59	241	3	43	10.44	1.47344e-05	0	0.0104493	0.0114943	0.0114943	0.0135841	0.014629	0.015674	0.0177638	0.0188088	0.0219436	0.0240334	0.0271682	0.031348	0.0355277	0.0407524	0.045977	0.0522466	0.0574713	0.0595611	0.061651	0.0606061	0.0574713	0.0501567	0.0428422	0.0344828	0.0282132	0.0250784	0.0229885	0.0219436	0.0177638	0.0135841	0.0104493	0.00835946	0.00835946	0.00626959	0.00626959	0.0031348	0.00208986	0.0031348	0.00208986	0.00208986	0.00104493
River	miss	P59	241	4	43	14.616	9.69794e-06	0	0.0105708	0.012685	0.012685	0.0137421	0.0158562	0.0158562	0.0190275	0.0200846	0.0211416	0.0243129	0.0274841	0.0306554	0.0359408	0.0422833	0.05074	0.0581395	0.064482	0.0665962	0.0676533	0.0655391	0.0591966	0.0496829	0.0401691	0.0306554	0.02537	0.0232558	0.0211416	0.0179704	0.0147992	0.0105708	0.00739958	0.00634249	0.00739958	0.00634249	0.00422833	0	0	0	0	0	0
River	miss	P59	241	5	43	18.792	6.60262e-06	0	0.0137566	0.015873	0.0169312	0.0179894	0.0190476	0.0222222	0.0232804	0.0253968	0.0285714	0.0296296	0.031746	0.0349206	0.0391534	0.042328	0.0486772	0.0550265	0.0582011	0.0613757	0.0603175	0.0571429	0.0518519	0.0444444	0.0338624	0.0253968	0.0201058	0.0179894	0.0179894	0.0179894	0.0179894	0.015873	0.0126984	0.00952381	0.00740741	0.0042328	0.0010582	0	0	0	0	0	0
River	miss	P60	242	1	43	2.218	6.40988e-05	0	0.0128617	0.0150054	0.0160772	0.0160772	0.0192926	0.0203644	0.022508	0.0246517	0.0278671	0.0289389	0.0332262	0.0353698	0.0385852	0.0418006	0.0460879	0.0503751	0.0535906	0.0557342	0.0557342	0.0546624	0.0514469	0.0460879	0.0385852	0.0310825	0.0257235	0.022508	0.0214362	0.0192926	0.0182208	0.0139335	0.0096463	0.00857449	0.00643087	0.00643087	0.00428725	0.00321543	0.00428725	0	0	0	0
River	miss	P60	242	2	43	6.654	2.3694e-05	0	0.0109769	0.0109769	0.0131723	0.0131723	0.0153677	0.0164654	0.0186608	0.0208562	0.0230516	0.025247	0.0274424	0.0307355	0.0318332	0.0351262	0.0362239	0.0373216	0.039517	0.039517	0.0406147	0.0417124	0.0417124	0.0417124	0.039517	0.0351262	0.0318332	0.0274424	0.025247	0.0241493	0.0241493	0.0230516	0.0219539	0.0208562	0.0186608	0.0164654	0.0131723	0.0120746	0.0109769	0.00987925	0.00987925	0.00987925	0.00768386
River	miss	P60	242	3	43	11.09	1.37413e-05	0	0.0150376	0.0161117	0.0182599	0.019334	0.0204082	0.0236305	0.0247046	0.027927	0.0290011	0.0322234	0.0343716	0.0365199	0.0397422	0.0429646	0.047261	0.0515575	0.0537057	0.056928	0.0558539	0.0526316	0.0483351	0.0418904	0.0332975	0.0247046	0.019334	0.0161117	0.0161117	0.0150376	0.0139635	0.0128894	0.0118153	0.0118153	0.0107411	0.0107411	0.0075188	0.00537057	0.00214823	0	0	0	0
River	miss	P60	242	4	43	15.526	8.90897e-06	0	0.0156425	0.0167598	0.0189944	0.0201117	0.0212291	0.024581	0.0268156	0.027933	0.0324022	0.0335196	0.0368715	0.0379888	0.0424581	0.0435754	0.0480447	0.0513966	0.0547486	0.0569832	0.0558659	0.0536313	0.0502793	0.0446927	0.0368715	0.027933	0.0223464	0.0189944	0.0167598	0.0156425	0.0134078	0.0100559	0.00670391	0.00558659	0.00558659	0.00558659	0	0	0	0	0	0	0
River	miss	P60	242	5	43	19.962	5.92515e-06	0	0.0140237	0.0161812	0.0161812	0.0183387	0.0204962	0.021575	0.0226537	0.0248112	0.0269687	0.0291262	0.0312837	0.03452	0.0377562	0.0442287	0.0507012	0.0582524	0.0625674	0.0658037	0.0647249	0.0625674	0.0550162	0.0453074	0.0366775	0.0269687	0.0226537	0.0204962	0.0204962	0.0183387	0.0151025	0.0107875	0.00539374	0	0	0	0	0	0	0	0	0	0
[truncated: 18 more columns]

## Sheet: bed
type	name	id	database no	number of grainsize classes	Mass fraction of sediment sample within each grain size bin (see bins tab for size classes)
River	Miss	P1	1	12	0	0	0	0	0.0263437	0.296939	0.521853	0.148202	0.00631736	3.64378e-05	2.64917e-08	2.33456e-12
River	Miss	P2	2	12	0	0	0	0	0.0263437	0.296939	0.521853	0.148202	0.00631736	3.64378e-05	2.64917e-08	2.33456e-12
River	Miss	P3	3	12	0	0	0	0	0.0263437	0.296939	0.521853	0.148202	0.00631736	3.64378e-05	2.64917e-08	2.33456e-12
River	Miss	P4	4	12	0	0	0	0	0.0248214	0.29629	0.527321	0.145532	0.00574682	2.90638e-05	1.74847e-08	1.2021e-12
River	Miss	P5	5	12	0	0	0	0	0.0248214	0.29629	0.527321	0.145532	0.00574682	2.90638e-05	1.74847e-08	1.2021e-12
River	Miss	P6	6	12	0	0	0	0	0.0248214	0.29629	0.527321	0.145532	0.00574682	2.90638e-05	1.74847e-08	1.2021e-12
River	Miss	P7	7	12	0	0	0	0	0.0248214	0.29629	0.527321	0.145532	0.00574682	2.90638e-05	1.74847e-08	1.2021e-12
River	Miss	P8	8	12	0	0	0	0	0.0140293	0.309695	0.576138	0.0988324	0.00126643	9.81894e-07	4.15706e-11	1.42109e-16
River	Miss	P9	9	12	0	0	0	0	0.0140293	0.309695	0.576138	0.0988324	0.00126643	9.81894e-07	4.15706e-11	1.42109e-16
River	Miss	P10	10	12	0	0	0	0	0.0140293	0.309695	0.576138	0.0988324	0.00126643	9.81894e-07	4.15706e-11	1.42109e-16
River	Miss	P11	11	12	0	0	0	0	0.0140293	0.309695	0.576138	0.0988324	0.00126643	9.81894e-07	4.15706e-11	1.42109e-16
River	Miss	P12	12	12	0	0	0	0	0.0117418	0.333024	0.583899	0.0708868	0.000431808	1.01449e-07	8.23093e-13	0
River	Miss	P13	13	12	0	0	0	0	0.0117418	0.333024	0.583899	0.0708868	0.000431808	1.01449e-07	8.23093e-13	0
River	Miss	P14	14	12	0	0	0	0	0.0117418	0.333024	0.583899	0.0708868	0.000431808	1.01449e-07	8.23093e-13	0
River	Miss	P15	15	12	0	0	0	0	0.0117418	0.333024	0.583899	0.0708868	0.000431808	1.01449e-07	8.23093e-13	0
River	Miss	P16	16	12	0	0	0	0	0.0101785	0.243434	0.585847	0.156458	0.00404245	8.42081e-06	1.2759e-09	1.35003e-14
River	Miss	P17	17	12	0	0	0	0	0.0101785	0.243434	0.585847	0.156458	0.00404245	8.42081e-06	1.2759e-09	1.35003e-14
River	Miss	P18	18	12	0	0	0	0	0.0101785	0.243434	0.585847	0.156458	0.00404245	8.42081e-06	1.2759e-09	1.35003e-14
River	Miss	P19	19	12	0	0	0	0	0.0101785	0.243434	0.585847	0.156458	0.00404245	8.42081e-06	1.2759e-09	1.35003e-14
River	Miss	P20	20	12	0	0	0	0	0.00369284	0.110822	0.492653	0.352477	0.0397024	0.000636292	1.32581e-06	3.40514e-10
River	Miss	P21	21	12	0	0	0	0	0.00369284	0.110822	0.492653	0.352477	0.0397024	0.000636292	1.32581e-06	3.40514e-10
River	Miss	P22	22	12	0	0	0	0	0.00369284	0.110822	0.492653	0.352477	0.0397024	0.000636292	1.32581e-06	3.40514e-10
River	Miss	P23	23	12	0	0	0	0	0.00369284	0.110822	0.492653	0.352477	0.0397024	0.000636292	1.32581e-06	3.40514e-10
River	Miss	P24	24	12	0	0	0	0	0.00369284	0.110822	0.492653	0.352477	0.0397024	0.000636292	1.32581e-06	3.40514e-10
River	Miss	P25	25	12	0	0	0	0	0.00369284	0.110822	0.492653	0.352477	0.0397024	0.000636292	1.32581e-06	3.40514e-10
River	Miss	P26	26	12	0	0	0	0	0.00369284	0.110822	0.492653	0.352477	0.0397024	0.000636292	1.32581e-06	3.40514e-10
River	Miss	P27	27	12	0	0	0	0	0.00369284	0.110822	0.492653	0.352477	0.0397024	0.000636292	1.32581e-06	3.40514e-10
River	Miss	P28	28	12	0	0	0	0	0.00369284	0.110822	0.492653	0.352477	0.0397024	0.000636292	1.32581e-06	3.40514e-10
River	Miss	P29	29	12	0	0	0	0	0.00369284	0.110822	0.492653	0.352477	0.0397024	0.000636292	1.32581e-06	3.40514e-10
River	Miss	P30	30	12	0	0	0	0	0.015	0.295	0.27	0.255	0.075	0.045	0.02	0.01
River	Miss	P31	31	12	0	0	0	0	0.015	0.295	0.27	0.255	0.075	0.045	0.02	0.01
River	Miss	P32	32	12	0	0	0	0	0.015	0.295	0.27	0.255	0.075	0.045	0.02	0.01
River	Miss	P33	33	12	0	0	0	0	0.015	0.295	0.27	0.255	0.075	0.045	0.02	0.01
River	Miss	P34	34	12	0	0	0	0	0.015	0.295	0.27	0.255	0.075	0.045	0.02	0.01
River	Miss	P35	35	12	0	0	0	0	0.015	0.295	0.27	0.255	0.075	0.045	0.02	0.01
River	Miss	P36	36	12	0	0	0	0	0.01	0.075	0.445	0.25	0.065	0.045	0.025	0.03
River	Miss	P37	37	12	0	0	0	0	0.01	0.075	0.445	0.25	0.065	0.045	0.025	0.03
River	Miss	P38	38	12	0	0	0	0	0.01	0.075	0.445	0.25	0.065	0.045	0.025	0.03
River	Miss	P39	39	12	0	0	0	0	0.01	0.075	0.445	0.25	0.065	0.045	0.025	0.03
River	Miss	P40	40	12	0	0	0	0	0.01	0.075	0.445	0.25	0.065	0.045	0.025	0.03
River	Miss	P41	41	12	0	0	0	0	0.01	0.075	0.445	0.25	0.065	0.045	0.025	0.03
River	Miss	P42	42	12	0	0	0	0	0.01	0.075	0.445	0.25	0.065	0.045	0.025	0.03
River	Miss	P43	43	12	0	0	0	0	0.045	0.15	0.34	0.225	0.06	0.06	0.045	0.03
River	Miss	P44	44	12	0	0	0	0	0.045	0.15	0.34	0.225	0.06	0.06	0.045	0.03
River	Miss	P45	45	12	0	0	0	0	0.045	0.15	0.34	0.225	0.06	0.06	0.045	0.03
River	Miss	P46	46	12	0	0	0	0	0.02	0.8	0.13	0.035	0.01	0.0025	0.0025	0
River	Miss	P47	47	12	0	0	0	0	0.02	0.8	0.13	0.035	0.01	0.0025	0.0025	0
River	Miss	P48	48	12	0	0	0	0	0.02	0.8	0.13	0.035	0.01	0.0025	0.0025	0
River	Miss	P49	49	12	0	0	0	0	0.02	0.8	0.13	0.035	0.01	0.0025	0.0025	0
River	Miss	P50	50	12	0	0	0	0	0.02	0.8	0.13	0.035	0.01	0.0025	0.0025	0
River	Miss	P51	51	12	0	0	0	0	0.02	0.8	0.13	0.035	0.01	0.0025	0.0025	0
River	Grand	P1	52	12	0	0	0	0	0.034	0.237	0.588	0.113	0.021	0	0	0
River	Grand	P2	53	12	0	0	0	0	0.032	0.304	0.402	0.167	0.09	0	0	0
River	Grand	P3	54	12	0	0	0	0	0.05	0.269	0.565	0.08	0.026	0	0	0
River	Grand	P4	55	12	0	0	0	0	0.015	0.151	0.409	0.3	0.122	0	0	0
River	Grand	P5	56	12	0	0	0	0	0.039	0.392	0.511	0.042	0.01	0	0	0
River	Grand	P6	57	12	0	0	0	0	0.119	0.333	0.506	0.034	0.003	0	0	0
River	Grand	P7	58	12	0	0	0	0	0.052	0.369	0.474	0.069	0.027	0	0	0
River	Grand	P8	59	12	0	0	0	0	0.063	0.327	0.447	0.114	0.037	0	0	0
River	Grand	P9	60	12	0	0	0	0	0.049	0.296	0.45	0.146	0.049	0	0	0
River	Grand	P10	61	12	0	0	0	0	0.046	0.292	0.476	0.121	0.055	0	0	0
River	Grand	P11	62	12	0	0	0	0	0.036	0.263	0.456	0.183	0.055	0	0	0
River	Grand	P12	63	12	0	0	0	0	0.031	0.308	0.471	0.125	0.059	0	0	0
River	Grand	P13	64	12	0	0	0	0	0.042	0.317	0.535	0.077	0.019	0	0	0
River	Grand	P14	65	12	0	0	0	0	0.131	0.514	0.151	0.01	0.158	0	0	0
River	Grand	P15	66	12	0	0	0	0	0.157	0.675	0.119	0.006	0.001	0	0	0
River	Grand	P16	67	12	0	0	0	0	0.197	0.606	0.13	0.007	0.006	0	0	0
River	Grand	P17	68	12	0	0	0	0	0.083	0.572	0.273	0.037	0.018	0	0	0
River	Grand	P18	69	12	0	0	0	0	0.134	0.599	0.2	0.026	0.009	0	0	0
River	Grand	P19	70	12	0	0	0	0	0.167	0.666	0.112	0.006	0.002	0	0	0
River	Grand	P20	71	12	0	0	0	0	0.202	0.608	0.094	0.004	0.004	0	0	0
River	Grand	P21	72	12	0	0	0	0	0.09	0.679	0.192	0.006	0.01	0	0	0
River	Grand	P22	73	12	0	0	0	0	0.073	0.408	0.41	0.05	0.006	0	0	0
River	Grand	P23	74	12	0	0	0	0	0.051	0.406	0.494	0.016	0.007	0	0	0
River	Ganges	P1	75	31	0	0.0006	0	0	0	0	0	0	0	0	0.0009	0.0012	0.0018	0.0017	0.0017	0.0024	0.0035	0.0054	0.0079	0.0172	0.039	0.0806	0.1358	0.1808	0.2201	0.1714	0.0896	0.0347	0.0036	0	0
River	Ganges	P2	76	31	0	0.0006	0	0	0	0	0	0	0	0	0.0009	0.0012	0.0018	0.0017	0.0017	0.0024	0.0035	0.0054	0.0079	0.0172	0.039	0.0806	0.1358	0.1808	0.2201	0.1714	0.0896	0.0347	0.0036	0	0
River	Ganges	P3	77	31	0.0044	0.0006	0.0005	0.0005	0.0006	0.0007	0.0006	0.0007	0.0008	0.0008	0.0009	0.0012	0.0018	0.0018	0.0018	0.0026	0.004	0.0069	0.0112	0.0264	0.0619	0.1213	0.1791	0.2087	0.1739	0.0752	0.0181	0.0079	0.0084	0.0202	0.0563
River	Ganges	P4	78	31	0	0.0005	0	0	0	0	0	0	0	0	0	0.0009	0.0013	0.0012	0.0012	0.0017	0.0025	0.004	0.0062	0.0145	0.0341	0.0715	0.124	0.1736	0.2248	0.1883	0.1032	0.0393	0.0072	0	0
River	Ganges	P5	79	31	0	0.0008	0	0	0.0009	0	0.0009	0.0011	0.0012	0.0011	0.0012	0.0016	0.0023	0.0023	0.0024	0.0038	0.0071	0.016	0.0308	0.0729	0.1374	0.1902	0.2016	0.1464	0.085	0.0434	0.023	0.0131	0.0083	0.0052	0
River	Ganges	P6	80	31	0.0091617	0.00183569	0.00189254	0.00176537	0.00238235	0.00296525	0.00286034	0.00343318	0.00375158	0.00333095	0.00337719	0.00371593	0.00465256	0.00463787	0.00629714	0.0123574	0.0246448	0.046164	0.0631716	0.107345	0.144366	0.149143	0.131568	0.102507	0.0757687	0.0734445	0.0089264	0.0045336	0	0	0
River	Ganges	P7	81	31	0.00217021	0.000810657	0.000706181	0.000881185	0.000705882	0.00118047	0.000402723	0.000690245	0.00143644	0.00149232	0.00161184	0.00192968	0.00248806	0.0022816	0.0021133	0.00293687	0.00493427	0.00982278	0.0167717	0.0409255	0.0991475	0.208638	0.236229	0.167086	0.102576	0.0698418	0.006348	0.007052	0.00679	0	0
River	Niobr	P1	82	7	0	0.01	0.3	0.64	0.03	0	0.01
River	Niobr	P2	83	7	0	0.02	0.38	0.53	0.05	0.01	0
River	Niobr	P3	84	7	0	0.02	0.38	0.51	0.07	0	0.01
River	Niobr	P4	85	7	0	0.01	0.36	0.55	0.06	0	0.01
River	Niobr	P5	86	7	0	0.02	0.49	0.43	0.04	0.01	0.01
River	Niobr	P6	87	7	0	0.01	0.42	0.55	0.02	0	0
River	Niobr	P7	88	7	0	0.02	0.4	0.57	0.01	0	0
River	Niobr	P8	89	7	0	0.02	0.42	0.54	0.02	0	0
River	Niobr	P9	90	7	0	0.04	0.54	0.39	0.02	0	0.01
River	Niobr	P10	91	7	0	0.06	0.46	0.4	0.06	0.01	0.01
River	Loup	P12	92	10	0	0	0	0.01	0.29	0.62	0.07	0	0.01	0
River	Loup	P13	93	10	0	0	0	0.01	0.29	0.62	0.07	0	0.01	0
River	Loup	P14	94	10	0	0	0	0.01	0.29	0.62	0.07	0	0.01	0
River	Loup	P15	95	10	0	0	0	0.01	0.29	0.62	0.07	0	0.01	0
River	Loup	P16	96	10	0	0	0	0.01	0.29	0.62	0.07	0	0.01	0
River	Loup	P17	97	10	0	0	0	0.01	0.21	0.66	0.09	0.02	0.01	0
River	Loup	P18	98	10	0	0	0	0.01	0.21	0.66	0.09	0.02	0.01	0
River	Loup	P19	99	10	0	0	0	0.01	0.21	0.66	0.09	0.02	0.01	0
River	Loup	P20	100	10	0	0	0	0.01	0.21	0.66	0.09	0.02	0.01	0
River	Loup	P21	101	10	0	0	0	0.01	0.21	0.66	0.09	0.02	0.01	0
River	Loup	P22	102	10	0	0	0	0.01	0.25	0.23	0.21	0.13	0.09	0.08
River	Loup	P23	103	10	0	0	0	0.01	0.25	0.23	0.21	0.13	0.09	0.08
River	Loup	P24	104	10	0	0	0	0.01	0.25	0.23	0.21	0.13	0.09	0.08
River	Loup	P25	105	10	0	0	0	0.01	0.25	0.23	0.21	0.13	0.09	0.08
River	Loup	P26	106	10	0	0	0	0.01	0.25	0.23	0.21	0.13	0.09	0.08
River	Loup	P27	107	10	0	0	0.01	0.01	0.15	0.41	0.22	0.11	0.05	0.04
River	Loup	P28	108	10	0	0	0.01	0.01	0.15	0.41	0.22	0.11	0.05	0.04
River	Loup	P29	109	10	0	0	0.01	0.01	0.15	0.41	0.22	0.11	0.05	0.04
River	Loup	P30	110	10	0	0	0.01	0.01	0.15	0.41	0.22	0.11	0.05	0.04
River	Loup	P31	111	10	0	0	0.01	0.01	0.15	0.41	0.22	0.11	0.05	0.04
River	Yellow	P12	112	51	0	0.000848296	0.000864531	0.000901555	0.000959374	0.00102494	0.00107609	0.00109005	0.00105293	0.000963547	0.000834988	0.000694905	0.00058698	0.000560762	0.000665729	0.000939579	0.00139502	0.00200642	0.00270002	0.00335506	0.0038192	0.00393514	0.00358664	0.00276108	0.00157173	0.000396715	0	0.000102843	0.00180084	0.00596989	0.013668	0.025519	0.0413397	0.0599815	0.0792694	0.0963279	0.108223	0.11267	0.108616	0.0966757	0.0790286	0.0587962	0.0389262	0.0223315	0.00996317
River	Yellow	P13	113	51	0	0	0	0	0	0	0	0	0	0	0	0	0	0	0.00016383	0.000750415	0.00128991	0.0019939	0.00275193	0.00343636	0.00385587	0.0038646	0.00337354	0.00243459	0.00110499	0.00016805	0	0	0.00113777	0.00514552	0.0130278	0.0253475	0.0419609	0.061587	0.0818523	0.0996413	0.11182	0.116011	0.111213	0.0982405	0.0795439	0.0584674	0.038088	0.0212968	0.009015
River	Yellow	P14	114	51	0	0	0	0	0	0	0	0	0	0	0	0	0	0	0.0001695	0.00076141	0.00117548	0.00177709	0.00248379	0.0031962	0.00374724	0.00397427	0.00373543	0.0029843	0.00176754	0.000466735	0	0	0.00182147	0.00659067	0.0146554	0.0260673	0.0404424	0.0566956	0.0731691	0.0878355	0.0986702	0.104042	0.103037	0.0957297	0.0832342	0.0673485	0.0502623	0.0338234	0.0198261
River	Yellow	P15	115	51	0	0	0	0	0	0	0	0	0	0	0	0	0	0	0.00017351	0.000777725	0.00118527	0.00178843	0.00247907	0.00314047	0.00360458	0.00373038	0.00341901	0.00267141	0.00164792	0.00047577	0	0	0.0017264	0.00616249	0.014516	0.0274745	0.0447255	0.0648465	0.0852671	0.102713	0.113995	0.116823	0.110421	0.0959329	0.0761227	0.0545524	0.0343056	0.0182395	0.0069252
River	Yellow	P16	116	51	0	0.00276032	0.0027756	0.00282436	0.00292069	0.00305921	0.00321967	0.00338204	0.00353753	0.00368591	0.00383103	0.00398054	0.00414782	0.00435226	0.00462172	0.00499605	0.00553045	0.00629995	0.00740138	0.00895004	0.0110718	0.0138907	0.0175124	0.0220033	0.0273707	0.0335229	0.0402501	0.047262	0.0541601	0.0604702	0.0656837	0.0693007	0.0708782	0.070085	0.066764	0.0609925	0.0531077	0.0436911	0.0335198	0.023565	0.0146371	0.00784407	0.00236749	0.000174841	0
River	Yellow	P17	117	51	0	0	0	0	0	0	0	0	0	0	0	0	0	0	0	9.6645e-05	0.00122336	0.00184766	0.00261679	0.00318963	0.00351848	0.00340156	0.00278594	0.0017171	0.000319205	0	0	0	0	0.00242827	0.00962974	0.0210651	0.037157	0.0568011	0.0777928	0.0970258	0.111193	0.117591	0.114811	0.10327	0.0851922	0.0638718	0.0427369	0.0246377	0.0112082
River	Yellow	P18	118	51	0	0	0	0	0	0	0	0	0	0	0	0	0	0	0	0	0	0	0	0	0	0	0	0	0	0	0	0	0	0.00258043	0.0114643	0.0243017	0.0425822	0.0642577	0.0867609	0.106491	0.119816	0.124015	0.117977	0.102745	0.0812871	0.0575455	0.035277	0.0174417	0.00535959
River	Yellow	P19	119	51	0	0.000914429	0.000945881	0.00100411	0.00109039	0.00119197	0.00128542	0.00134473	0.00135104	0.00129738	0.00119131	0.00105656	0.000936192	0.000884157	0.000959834	0.00121635	0.00168635	0.00236632	0.0032018	0.00408208	0.00484814	0.00531536	0.00531317	0.00474467	0.00365769	0.00230717	0.0011854	0.000996681	0.00260071	0.00686668	0.0144551	0.0256055	0.0399607	0.056466	0.0733802	0.0885028	0.0995882	0.104803	0.103117	0.0946364	0.08065	0.0632846	0.0449072	0.0278951	0.0137684
River	Yellow	P20	120	51	0	0.000836495	0.0008912	0.000978536	0.00109186	0.00121736	0.00132865	0.00139767	0.00140426	0.00134132	0.00121796	0.00106109	0.000918415	0.000848203	0.000912548	0.0011638	0.00162809	0.0022878	0.00306742	0.00382576	0.00438564	0.00452101	0.00406418	0.00304751	0.000650909	0	0	0	0	0.00089021	0.00526446	0.0146597	0.0300389	0.0511205	0.07563	0.0994742	0.117745	0.126174	0.122494	0.107441	0.0846615	0.0592433	0.03586	0.0179683	0.00649273
River	Yellow	P21	121	51	0	0.000794938	0.000833404	0.000900663	0.000997588	0.00111184	0.00122066	0.00129788	0.00132249	0.00128338	0.00118259	0.00103799	0.000887953	0.000784156	0.000787479	0.000957195	0.00133667	0.00193601	0.0027135	0.00356415	0.00432344	0.00478189	0.00472845	0.00401841	0.0025697	0.000706552	0	0	0	0.000172863	0.00265223	0.0095234	0.0221262	0.0409739	0.0646855	0.0898009	0.111461	0.124769	0.126323	0.115532	0.0950825	0.069811	0.0447191	0.0242213	0.00997184
River	Yellow	P22	122	51	0	0	0	0	0	0	0	0	0	0	0	0	0	0	0.00019004	0.00084976	0.00127621	0.00190002	0.00261173	0.00329746	0.00378936	0.00394322	0.00364966	0.00289112	0.00179678	0.00050191	0	0	0.000587725	0.003581	0.0101441	0.0210025	0.0363032	0.055082	0.0752487	0.0938364	0.107673	0.114162	0.111947	0.101419	0.0846761	0.064765	0.0448787	0.0275039	0.0142682
River	Yellow	P23	123	51	0	0.00114528	0.0011381	0.00113174	0.00112429	0.00110236	0.00104787	0.000955591	0.000813616	0.000697438	0.000551611	0.000266223	0.000497759	0.000811509	0.0011203	0.00160375	0.00212561	0.00260019	0.00289847	0.00289723	0.00252782	0.00179288	0.000847705	6.60216e-05	0	0.000242398	0.00213767	0.00624666	0.0135489	0.0245528	0.0391211	0.0563035	0.0743376	0.0908472	0.103245	0.109348	0.107928	0.0990305	0.0839599	0.0652233	0.045794	0.0281872	0.0146946	0.00501428	0.000473169
River	Yellow	P24	124	51	0	0.00152051	0.00148684	0.00144204	0.00138463	0.00130411	0.00118852	0.00103829	0.00087529	0.000738816	0.000676477	0.000734737	0.000947088	0.0013194	0.00182154	0.00238195	0.00288978	0.00320845	0.00320696	0.0027968	0.00200701	0.000951419	0	0	0.00028423	0.00209048	0.00637941	0.0139909	0.0254733	0.0406384	0.0584076	0.0768512	0.0934451	0.105523	0.110871	0.108348	0.098207	0.0820304	0.062373	0.0423787	0.0246629	0.0117463	0.0023781	0	0
River	Yellow	P25	125	51	0	0	0	0	0	0	0	0	0	0	0	0	0	0.0002915	0.00076295	0.00118862	0.00173054	0.00234452	0.00289637	0.00324508	0.0032214	0.00278138	0.00189154	0.000171825	0	0	0.000113015	0.00246882	0.00810323	0.0169513	0.0289491	0.0435615	0.0595974	0.0754201	0.0891108	0.0988302	0.103175	0.101447	0.0937811	0.0812551	0.0656055	0.0489158	0.0328748	0.0194165	0.00882618
River	Yellow	P26	126	51	0	0.000985734	0.00100101	0.00102659	0.00106044	0.00108852	0.00108985	0.00104667	0.000954249	0.000823509	0.000680119	0.00056208	0.000517402	0.000590953	0.000816878	0.00120687	0.0017395	0.00235257	0.00294311	0.00338164	0.00353883	0.00332386	0.00273243	0.00190242	0.00115546	0.00100645	0.00211731	0.00521354	0.0109584	0.0197697	0.0316357	0.0459979	0.0617166	0.0771411	0.0903039	0.0992843	0.102616	0.0996102	0.0905066	0.0766039	0.059916	0.0427256	0.0269625	0.0142511	0.00503543
River	Yellow	P27	127	51	0	0	0	0	0	0	0	0	0	0	0	0	0	0	0	5.333e-05	0.000688615	0.00125988	0.00199427	0.00256219	0.00293905	0.00291869	0.00243918	0.00152087	0.000284015	0	0	0	0	0.00204849	0.00853519	0.0192485	0.0345709	0.053638	0.0744378	0.0940116	0.109082	0.116836	0.115634	0.105586	0.0886349	0.0678796	0.0467151	0.0280382	0.0137291
River	Yellow	P28	128	51	0	0	0	0	0	0	0	0	0	0	0	0	0	0	0.00017795	0.000803895	0.00127998	0.001817	0.00231165	0.00266626	0.00272982	0.00243498	0.00176533	0.000786665	0.000116705	0	0.000196265	0.00318197	0.00844513	0.0167333	0.0281473	0.0422407	0.0580364	0.0740173	0.0882961	0.0989262	0.104287	0.103417	0.0962224	0.083655	0.0674838	0.0499723	0.0330066	0.0188448	0.00781199
River	Yellow	P29	129	51	0	0.000997323	0.00103505	0.00109647	0.00117969	0.00126806	0.001335	0.00135434	0.00131177	0.00120955	0.00106799	0.000924958	0.000835736	0.000859582	0.00105104	0.00144546	0.00204371	0.00279821	0.00360479	0.00430857	0.00472839	0.00468955	0.00408548	0.00295675	0.00144125	0.000271423	0	0.000443816	0.0032445	0.00959697	0.020439	0.0358893	0.0549716	0.0755482	0.0945442	0.108611	0.115004	0.112319	0.100867	0.0828439	0.0616317	0.0407501	0.0230616	0.0100633	0.00227079
River	Yellow	P30	130	51	0	0	0	0	0	0	0	0	0	0	0	0	0	0	0	0	0	0.000881225	0.00153469	0.00243888	0.00315569	0.00371448	0.00385105	0.00343727	0.0025393	0.000831445	0	0	0	0	0.00047902	0.00429152	0.0130706	0.0273319	0.0469584	0.0700765	0.0932687	0.112282	0.123109	0.123158	0.112423	0.0933369	0.0699002	0.0463894	0.0263943
River	Yellow	P31	131	51	0	0.00104567	0.00106397	0.00109493	0.00113662	0.00117433	0.00118599	0.00115284	0.00106984	0.000948287	0.000814681	0.000707867	0.000676261	0.000764566	0.00100573	0.00140906	0.00194956	0.00256082	0.00313612	0.00354382	0.00365484	0.00338161	0.00272631	0.00183633	0.00104449	0.000877034	0.00200565	0.00516341	0.0110186	0.0199905	0.0320618	0.0466589	0.0626151	0.078242	0.0915267	0.100501	0.103663	0.100308	0.0906945	0.0761772	0.0588661	0.0410644	0.0249952	0.0118232	0.0026629
River	Yellow	P32	132	51	0	0.00102397	0.00103822	0.00106661	0.0011094	0.00115461	0.00118255	0.00117485	0.00112339	0.00103283	0.000920554	0.00081586	0.000759887	0.000795291	0.000960361	0.00127879	0.00174926	0.00233651	0.00296707	0.00353597	0.00392437	0.00402838	0.00379846	0.00328909	0.00270402	0.00241984	0.00296865	0.00498519	0.00911817	0.0158833	0.0254913	0.0377143	0.0518083	0.0665156	0.0801715	0.0909682	0.0973041	0.0981075	0.0930582	0.0827858	0.0687387	0.05283	0.0369981	0.022926	0.0116657
River	Yellow	P33	133	51	0	0	0	0	0	0	0	0	0	0	0	0	0	0	0	5.203e-05	0.00066817	0.00115135	0.00183251	0.00246174	0.00300087	0.00326481	0.00315878	0.00263202	0.00186627	0.000610955	0	0	0.00078117	0.00330876	0.00875997	0.0180791	0.031689	0.0491497	0.0689304	0.088464	0.104614	0.114383	0.115662	0.107916	0.0925359	0.0723481	0.0507948	0.0310736	0.0154739
River	Yellow	P34	134	51	0	0.00077609	0.000797077	0.000836372	0.000888006	0.000941611	0.000977806	0.000978649	0.000935396	0.000851304	0.000742318	0.000636617	0.000574665	0.000599078	0.000748347	0.00104603	0.00148945	0.00203964	0.00261671	0.00310198	0.00336994	0.00328488	0.0027894	0.00201477	0.00042501	0	2.05653e-05	0.000591113	0.00278483	0.00755133	0.0157185	0.0277129	0.0432553	0.0612202	0.0795962	0.0957597	0.107023	0.111254	0.107405	0.0959429	0.0788147	0.0589405	0.0391591	0.0224194	0.00976331
River	Yellow	P35	135	51	0	0	0	0	0	0	0	0	0	0	0	0	0	0	0.000161395	0.000733895	0.00121441	0.00190225	0.00267681	0.00339393	0.00384936	0.00386361	0.00331595	0.00223831	0.000444265	0	0	0	0	0.00080761	0.00600469	0.0165797	0.0320341	0.0517498	0.0735213	0.0941579	0.110123	0.118395	0.11725	0.106858	0.0893428	0.0680097	0.046407	0.0275173	0.0131999
River	Yellow	P36	136	51	0	0.0024946	0.00254155	0.00259643	0.00266602	0.00274599	0.00282786	0.00291307	0.0030197	0.00317394	0.00339841	0.00370456	0.00408363	0.00450486	0.00491484	0.00524541	0.00542816	0.00541818	0.00522591	0.0049476	0.00478487	0.00504939	0.0061479	0.00854052	0.0126627	0.0188118	0.0270313	0.037083	0.0483702	0.0599599	0.0706948	0.0793557	0.0848451	0.086371	0.0836066	0.0767747	0.0666109	0.0542257	0.0409459	0.0282135	0.0170388	0.00896371	0.00206152	0	0
River	Yellow	P37	137	51	0	0.000912886	0.0009541	0.00102162	0.00111642	0.0012263	0.00132929	0.00140148	0.0014261	0.00139725	0.00132197	0.0012216	0.00113424	0.00110707	0.0011915	0.00143324	0.00186037	0.00247027	0.00321779	0.0040117	0.00472224	0.00520157	0.00531853	0.00500991	0.00434059	0.00355399	0.00309343	0.00357932	0.0057544	0.0103542	0.0179165	0.0285958	0.0420107	0.0571597	0.0724404	0.0858632	0.09543	0.0995474	0.0973755	0.0891276	0.076083	0.0602045	0.0437174	0.028531	0.0161597
River	Yellow	P38	138	51	0	0	0	0	0	0	0	0	0	0	0	0	0	0	0	0	0	0.00096166	0.0016435	0.00257313	0.00332821	0.00391799	0.00406419	0.00362584	0.00263955	0.0008477	0	0	0	0	4.2525e-05	0.00228807	0.00959862	0.0230937	0.0431883	0.0681709	0.0942307	0.116256	0.129217	0.12973	0.117648	0.0959535	0.0696248	0.0439035	0.0230183
River	Yellow	P39	139	51	0	0.00156884	0.0016744	0.00181645	0.00199101	0.00217707	0.00234274	0.00246022	0.00251894	0.00252784	0.00251331	0.00251633	0.00258875	0.00278007	0.00312747	0.00364346	0.00430475	0.00504534	0.00575786	0.00630897	0.00656615	0.00643511	0.00590573	0.00510418	0.00432933	0.00405812	0.00490045	0.00751975	0.0125179	0.0202684	0.0307511	0.0434526	0.0573435	0.0709514	0.0825442	0.0904527	0.0934192	0.0908642	0.0830046	0.0709567	0.056437	0.0413855	0.0274518	0.0160348	0.00755646
River	Yellow	P40	140	51	0	0.000947598	0.00101231	0.00110696	0.00122661	0.00135588	0.00146863	0.00153896	0.0015511	0.00150338	0.00140959	0.00129924	0.00121861	0.00122024	0.00135629	0.00166655	0.00216501	0.00282661	0.0035771	0.00429424	0.00482149	0.00499618	0.00469227	0.00387926	0.00268431	0.00143923	0.000687623	0.00114049	0.00360077	0.00880686	0.0172268	0.028877	0.0431913	0.0589751	0.0744759	0.0876503	0.0965648	0.0997949	0.0967261	0.0878006	0.0744478	0.0586815	0.0426361	0.028152	0.0165001
River	Yellow	P41	141	51	0	0.00112301	0.00116904	0.0012421	0.00134188	0.00145295	0.00154968	0.00160611	0.00160678	0.00155032	0.00145048	0.00133613	0.00125252	0.00125116	0.0013838	0.00169085	0.00218821	0.00285418	0.00361937	0.00436729	0.00494731	0.0052012	0.00500415	0.00432159	0.00326999	0.00216375	0.00152494	0.00204379	0.00450776	0.00965174	0.0179565	0.0294684	0.0436665	0.0594086	0.0749883	0.088382	0.0976303	0.10123	0.0984429	0.0895663	0.075909	0.0594476	0.0423514	0.026653	0.0137478
River	Yellow	P42	142	51	0	0	0	0	0	0	0	0	0	0	0	0	0	0	0	0	0	0.000848955	0.00144569	0.00223747	0.00284849	0.00329757	0.00335592	0.00292857	0.00204185	0.00063021	0	0	0	0	0.00106462	0.00653262	0.0162594	0.0306522	0.0490836	0.0697278	0.089793	0.106051	0.11556	0.116367	0.108289	0.0928487	0.0728097	0.051447	0.031833
River	Yellow	P43	143	51	0	0.000882926	0.000922921	0.000986652	0.00107205	0.0011634	0.00123564	0.00126363	0.00123246	0.00114157	0.00100623	0.000857653	0.00074416	0.000719977	0.000838421	0.0011392	0.00163426	0.00229406	0.00303774	0.00373476	0.00422196	0.00433004	0.0039344	0.0030233	0.00168259	0.000407634	0	0	0.00145997	0.0054739	0.0130722	0.0248694	0.0406925	0.0593679	0.078692	0.0957622	0.107635	0.112043	0.107974	0.0960953	0.0786374	0.058667	0.0392527	0.0228135	0.0106961
River	Yellow	P44	144	51	0	0.000433828	0.000447437	0.000469188	0.000497749	0.000525603	0.000541326	0.000534201	0.000499247	0.000439155	0.000364672	0.000294022	0.000252444	0.000438293	0.000795504	0.00116708	0.00171255	0.0023585	0.00298368	0.00343872	0.00355886	0.00323416	0.0024089	0.0010727	0.00012732	0	0	0	0.001574	0.00666657	0.0158744	0.029342	0.0465656	0.0659307	0.0849409	0.100644	0.11034	0.112238	0.105886	0.0924512	0.0743948	0.0547152	0.0361955	0.0208753	0.00975841
River	Yellow	P45	145	51	0	0	0	0	0	0	0	0	0	0	0	0	0	0	0	0	0	0.000961175	0.00161508	0.00240511	0.00289941	0.00314302	0.00293085	0.00226405	0.00104764	0.000138535	0	0	0	0.000408425	0.00400314	0.012031	0.0245363	0.0414889	0.0615226	0.0822002	0.100386	0.112916	0.117365	0.112719	0.0998585	0.0811695	0.0599296	0.0392846	0.0219655
River	Yellow	P46	146	51	0	0	0	0	0	0	0	0	0	0	0	0	0	0	0	5.827e-05	0.000751575	0.00134761	0.00218683	0.00294815	0.00358238	0.00383358	0.0035715	0.00276877	0.00130036	0.000182975	0	0	0	0.000249055	0.00397917	0.0127057	0.0262242	0.0443704	0.065458	0.0866872	0.104628	0.116007	0.118534	0.111595	0.0966016	0.0764228	0.0545737	0.0342603	0.0179088
River	Fraser	P1	147	60	2.5877e-07	5.85214e-07	1.28739e-06	2.75483e-06	5.73422e-06	1.16104e-05	2.2867e-05	4.38093e-05	8.16425e-05	0.000147999	0.000260972	0.000447631	0.000746863	0.00121214	0.00191363	0.00293871	0.00438982	0.00637867	0.00901584	0.0123958	0.0165781	0.021567	0.027292	0.033595	0.0402259	0.0468522	0.053082	0.0585001	0.0627132	0.0653963	0.0663347	0.0654517	0.0628193	0.0586487	0.0532619	0.0470508	0.0404306	0.0337945	0.0274773	0.0217318	0.0167189	0.0125117	0.00910781	0.0064492	0.00444211
River	Fraser	P2	148	60	2.5877e-07	5.85214e-07	1.28739e-06	2.75483e-06	5.73422e-06	1.16104e-05	2.2867e-05	4.38093e-05	8.16425e-05	0.000147999	0.000260972	0.000447631	0.000746863	0.00121214	0.00191363	0.00293871	0.00438982	0.00637867	0.00901584	0.0123958	0.0165781	0.021567	0.027292	0.033595	0.0402259	0.0468522	0.053082	0.0585001	0.0627132	0.0653963	0.0663347	0.0654517	0.0628193	0.0586487	0.0532619	0.0470508	0.0404306	0.0337945	0.0274773	0.0217318	0.0167189	0.0125117	0.00910781	0.0064492	0.00444211
River	Fraser	P3	149	60	2.5877e-07	5.85214e-07	1.28739e-06	2.75483e-06	5.73422e-06	1.16104e-05	2.2867e-05	4.38093e-05	8.16425e-05	0.000147999	0.000260972	0.000447631	0.000746863	0.00121214	0.00191363	0.00293871	0.00438982	0.00637867	0.00901584	0.0123958	0.0165781	0.021567	0.027292	0.033595	0.0402259	0.0468522	0.053082	0.0585001	0.0627132	0.0653963	0.0663347	0.0654517	0.0628193	0.0586487	0.0532619	0.0470508	0.0404306	0.0337945	0.0274773	0.0217318	0.0167189	0.0125117	0.00910781	0.0064492	0.00444211
River	Fraser	P4	150	60	2.5877e-07	5.85214e-07	1.28739e-06	2.75483e-06	5.73422e-06	1.16104e-05	2.2867e-05	4.38093e-05	8.16425e-05	0.000147999	0.000260972	0.000447631	0.000746863	0.00121214	0.00191363	0.00293871	0.00438982	0.00637867	0.00901584	0.0123958	0.0165781	0.021567	0.027292	0.033595	0.0402259	0.0468522	0.053082	0.0585001	0.0627132	0.0653963	0.0663347	0.0654517	0.0628193	0.0586487	0.0532619	0.0470508	0.0404306	0.0337945	0.0274773	0.0217318	0.0167189	0.0125117	0.00910781	0.0064492	0.00444211
River	Fraser	P5	151	60	2.5877e-07	5.85214e-07	1.28739e-06	2.75483e-06	5.73422e-06	1.16104e-05	2.2867e-05	4.38093e-05	8.16425e-05	0.000147999	0.000260972	0.000447631	0.000746863	0.00121214	0.00191363	0.00293871	0.00438982	0.00637867	0.00901584	0.0123958	0.0165781	0.021567	0.027292	0.033595	0.0402259	0.0468522	0.053082	0.0585001	0.0627132	0.0653963	0.0663347	0.0654517	0.0628193	0.0586487	0.0532619	0.0470508	0.0404306	0.0337945	0.0274773	0.0217318	0.0167189	0.0125117	0.00910781	0.0064492	0.00444211
River	Fraser	P6	152	60	2.5877e-07	5.85214e-07	1.28739e-06	2.75483e-06	5.73422e-06	1.16104e-05	2.2867e-05	4.38093e-05	8.16425e-05	0.000147999	0.000260972	0.000447631	0.000746863	0.00121214	0.00191363	0.00293871	0.00438982	0.00637867	0.00901584	0.0123958	0.0165781	0.021567	0.027292	0.033595	0.0402259	0.0468522	0.053082	0.0585001	0.0627132	0.0653963	0.0663347	0.0654517	0.0628193	0.0586487	0.0532619	0.0470508	0.0404306	0.0337945	0.0274773	0.0217318	0.0167189	0.0125117	0.00910781	0.0064492	0.00444211
River	Fraser	P7	153	60	2.5877e-07	5.85214e-07	1.28739e-06	2.75483e-06	5.73422e-06	1.16104e-05	2.2867e-05	4.38093e-05	8.16425e-05	0.000147999	0.000260972	0.000447631	0.000746863	0.00121214	0.00191363	0.00293871	0.00438982	0.00637867	0.00901584	0.0123958	0.0165781	0.021567	0.027292	0.033595	0.0402259	0.0468522	0.053082	0.0585001	0.0627132	0.0653963	0.0663347	0.0654517	0.0628193	0.0586487	0.0532619	0.0470508	0.0404306	0.0337945	0.0274773	0.0217318	0.0167189	0.0125117	0.00910781	0.0064492	0.00444211
River	Fraser	P8	154	60	2.5877e-07	5.85214e-07	1.28739e-06	2.75483e-06	5.73422e-06	1.16104e-05	2.2867e-05	4.38093e-05	8.16425e-05	0.000147999	0.000260972	0.000447631	0.000746863	0.00121214	0.00191363	0.00293871	0.00438982	0.00637867	0.00901584	0.0123958	0.0165781	0.021567	0.027292	0.033595	0.0402259	0.0468522	0.053082	0.0585001	0.0627132	0.0653963	0.0663347	0.0654517	0.0628193	0.0586487	0.0532619	0.0470508	0.0404306	0.0337945	0.0274773	0.0217318	0.0167189	0.0125117	0.00910781	0.0064492	0.00444211
River	Fraser	P9	155	60	2.5877e-07	5.85214e-07	1.28739e-06	2.75483e-06	5.73422e-06	1.16104e-05	2.2867e-05	4.38093e-05	8.16425e-05	0.000147999	0.000260972	0.000447631	0.000746863	0.00121214	0.00191363	0.00293871	0.00438982	0.00637867	0.00901584	0.0123958	0.0165781	0.021567	0.027292	0.033595	0.0402259	0.0468522	0.053082	0.0585001	0.0627132	0.0653963	0.0663347	0.0654517	0.0628193	0.0586487	0.0532619	0.0470508	0.0404306	0.0337945	0.0274773	0.0217318	0.0167189	0.0125117	0.00910781	0.0064492	0.00444211
River	Fraser	P10	156	60	2.5877e-07	5.85214e-07	1.28739e-06	2.75483e-06	5.73422e-06	1.16104e-05	2.2867e-05	4.38093e-05	8.16425e-05	0.000147999	0.000260972	0.000447631	0.000746863	0.00121214	0.00191363	0.00293871	0.00438982	0.00637867	0.00901584	0.0123958	0.0165781	0.021567	0.027292	0.033595	0.0402259	0.0468522	0.053082	0.0585001	0.0627132	0.0653963	0.0663347	0.0654517	0.0628193	0.0586487	0.0532619	0.0470508	0.0404306	0.0337945	0.0274773	0.0217318	0.0167189	0.0125117	0.00910781	0.0064492	0.00444211
River	Fraser	P11	157	60	2.5877e-07	5.85214e-07	1.28739e-06	2.75483e-06	5.73422e-06	1.16104e-05	2.2867e-05	4.38093e-05	8.16425e-05	0.000147999	0.000260972	0.000447631	0.000746863	0.00121214	0.00191363	0.00293871	0.00438982	0.00637867	0.00901584	0.0123958	0.0165781	0.021567	0.027292	0.033595	0.0402259	0.0468522	0.053082	0.0585001	0.0627132	0.0653963	0.0663347	0.0654517	0.0628193	0.0586487	0.0532619	0.0470508	0.0404306	0.0337945	0.0274773	0.0217318	0.0167189	0.0125117	0.00910781	0.0064492	0.00444211
River	Fraser	P12	158	60	2.5877e-07	5.85214e-07	1.28739e-06	2.75483e-06	5.73422e-06	1.16104e-05	2.2867e-05	4.38093e-05	8.16425e-05	0.000147999	0.000260972	0.000447631	0.000746863	0.00121214	0.00191363	0.00293871	0.00438982	0.00637867	0.00901584	0.0123958	0.0165781	0.021567	0.027292	0.033595	0.0402259	0.0468522	0.053082	0.0585001	0.0627132	0.0653963	0.0663347	0.0654517	0.0628193	0.0586487	0.0532619	0.0470508	0.0404306	0.0337945	0.0274773	0.0217318	0.0167189	0.0125117	0.00910781	0.0064492	0.00444211
River	Fraser	P13	159	60	2.5877e-07	5.85214e-07	1.28739e-06	2.75483e-06	5.73422e-06	1.16104e-05	2.2867e-05	4.38093e-05	8.16425e-05	0.000147999	0.000260972	0.000447631	0.000746863	0.00121214	0.00191363	0.00293871	0.00438982	0.00637867	0.00901584	0.0123958	0.0165781	0.021567	0.027292	0.033595	0.0402259	0.0468522	0.053082	0.0585001	0.0627132	0.0653963	0.0663347	0.0654517	0.0628193	0.0586487	0.0532619	0.0470508	0.0404306	0.0337945	0.0274773	0.0217318	0.0167189	0.0125117	0.00910781	0.0064492	0.00444211
River	Fraser	P14	160	60	2.5877e-07	5.85214e-07	1.28739e-06	2.75483e-06	5.73422e-06	1.16104e-05	2.2867e-05	4.38093e-05	8.16425e-05	0.000147999	0.000260972	0.000447631	0.000746863	0.00121214	0.00191363	0.00293871	0.00438982	0.00637867	0.00901584	0.0123958	0.0165781	0.021567	0.027292	0.033595	0.0402259	0.0468522	0.053082	0.0585001	0.0627132	0.0653963	0.0663347	0.0654517	0.0628193	0.0586487	0.0532619	0.0470508	0.0404306	0.0337945	0.0274773	0.0217318	0.0167189	0.0125117	0.00910781	0.0064492	0.00444211
River	Fraser	P15	161	60	2.5877e-07	5.85214e-07	1.28739e-06	2.75483e-06	5.73422e-06	1.16104e-05	2.2867e-05	4.38093e-05	8.16425e-05	0.000147999	0.000260972	0.000447631	0.000746863	0.00121214	0.00191363	0.00293871	0.00438982	0.00637867	0.00901584	0.0123958	0.0165781	0.021567	0.027292	0.033595	0.0402259	0.0468522	0.053082	0.0585001	0.0627132	0.0653963	0.0663347	0.0654517	0.0628193	0.0586487	0.0532619	0.0470508	0.0404306	0.0337945	0.0274773	0.0217318	0.0167189	0.0125117	0.00910781	0.0064492	0.00444211
River	Fraser	P16	162	60	2.5877e-07	5.85214e-07	1.28739e-06	2.75483e-06	5.73422e-06	1.16104e-05	2.2867e-05	4.38093e-05	8.16425e-05	0.000147999	0.000260972	0.000447631	0.000746863	0.00121214	0.00191363	0.00293871	0.00438982	0.00637867	0.00901584	0.0123958	0.0165781	0.021567	0.027292	0.033595	0.0402259	0.0468522	0.053082	0.0585001	0.0627132	0.0653963	0.0663347	0.0654517	0.0628193	0.0586487	0.0532619	0.0470508	0.0404306	0.0337945	0.0274773	0.0217318	0.0167189	0.0125117	0.00910781	0.0064492	0.00444211
River	Fraser	P17	163	60	2.5877e-07	5.85214e-07	1.28739e-06	2.75483e-06	5.73422e-06	1.16104e-05	2.2867e-05	4.38093e-05	8.16425e-05	0.000147999	0.000260972	0.000447631	0.000746863	0.00121214	0.00191363	0.00293871	0.00438982	0.00637867	0.00901584	0.0123958	0.0165781	0.021567	0.027292	0.033595	0.0402259	0.0468522	0.053082	0.0585001	0.0627132	0.0653963	0.0663347	0.0654517	0.0628193	0.0586487	0.0532619	0.0470508	0.0404306	0.0337945	0.0274773	0.0217318	0.0167189	0.0125117	0.00910781	0.0064492	0.00444211
River	Fraser	P18	164	60	2.5877e-07	5.85214e-07	1.28739e-06	2.75483e-06	5.73422e-06	1.16104e-05	2.2867e-05	4.38093e-05	8.16425e-05	0.000147999	0.000260972	0.000447631	0.000746863	0.00121214	0.00191363	0.00293871	0.00438982	0.00637867	0.00901584	0.0123958	0.0165781	0.021567	0.027292	0.033595	0.0402259	0.0468522	0.053082	0.0585001	0.0627132	0.0653963	0.0663347	0.0654517	0.0628193	0.0586487	0.0532619	0.0470508	0.0404306	0.0337945	0.0274773	0.0217318	0.0167189	0.0125117	0.00910781	0.0064492	0.00444211
River	Fraser	P19	165	60	2.5877e-07	5.85214e-07	1.28739e-06	2.75483e-06	5.73422e-06	1.16104e-05	2.2867e-05	4.38093e-05	8.16425e-05	0.000147999	0.000260972	0.000447631	0.000746863	0.00121214	0.00191363	0.00293871	0.00438982	0.00637867	0.00901584	0.0123958	0.0165781	0.021567	0.027292	0.033595	0.0402259	0.0468522	0.053082	0.0585001	0.0627132	0.0653963	0.0663347	0.0654517	0.0628193	0.0586487	0.0532619	0.0470508	0.0404306	0.0337945	0.0274773	0.0217318	0.0167189	0.0125117	0.00910781	0.0064492	0.00444211
River	Fraser	P20	166	60	2.5877e-07	5.85214e-07	1.28739e-06	2.75483e-06	5.73422e-06	1.16104e-05	2.2867e-05	4.38093e-05	8.16425e-05	0.000147999	0.000260972	0.000447631	0.000746863	0.00121214	0.00191363	0.00293871	0.00438982	0.00637867	0.00901584	0.0123958	0.0165781	0.021567	0.027292	0.033595	0.0402259	0.0468522	0.053082	0.0585001	0.0627132	0.0653963	0.0663347	0.0654517	0.0628193	0.0586487	0.0532619	0.0470508	0.0404306	0.0337945	0.0274773	0.0217318	0.0167189	0.0125117	0.00910781	0.0064492	0.00444211
River	Fraser	P21	167	60	2.5877e-07	5.85214e-07	1.28739e-06	2.75483e-06	5.73422e-06	1.16104e-05	2.2867e-05	4.38093e-05	8.16425e-05	0.000147999	0.000260972	0.000447631	0.000746863	0.00121214	0.00191363	0.00293871	0.00438982	0.00637867	0.00901584	0.0123958	0.0165781	0.021567	0.027292	0.033595	0.0402259	0.0468522	0.053082	0.0585001	0.0627132	0.0653963	0.0663347	0.0654517	0.0628193	0.0586487	0.0532619	0.0470508	0.0404306	0.0337945	0.0274773	0.0217318	0.0167189	0.0125117	0.00910781	0.0064492	0.00444211
River	Fraser	P22	168	60	2.5877e-07	5.85214e-07	1.28739e-06	2.75483e-06	5.73422e-06	1.16104e-05	2.2867e-05	4.38093e-05	8.16425e-05	0.000147999	0.000260972	0.000447631	0.000746863	0.00121214	0.00191363	0.00293871	0.00438982	0.00637867	0.00901584	0.0123958	0.0165781	0.021567	0.027292	0.033595	0.0402259	0.0468522	0.053082	0.0585001	0.0627132	0.0653963	0.0663347	0.0654517	0.0628193	0.0586487	0.0532619	0.0470508	0.0404306	0.0337945	0.0274773	0.0217318	0.0167189	0.0125117	0.00910781	0.0064492	0.00444211
River	Fraser	P23	169	60	2.5877e-07	5.85214e-07	1.28739e-06	2.75483e-06	5.73422e-06	1.16104e-05	2.2867e-05	4.38093e-05	8.16425e-05	0.000147999	0.000260972	0.000447631	0.000746863	0.00121214	0.00191363	0.00293871	0.00438982	0.00637867	0.00901584	0.0123958	0.0165781	0.021567	0.027292	0.033595	0.0402259	0.0468522	0.053082	0.0585001	0.0627132	0.0653963	0.0663347	0.0654517	0.0628193	0.0586487	0.0532619	0.0470508	0.0404306	0.0337945	0.0274773	0.0217318	0.0167189	0.0125117	0.00910781	0.0064492	0.00444211
River	Fraser	P24	170	60	2.5877e-07	5.85214e-07	1.28739e-06	2.75483e-06	5.73422e-06	1.16104e-05	2.2867e-05	4.38093e-05	8.16425e-05	0.000147999	0.000260972	0.000447631	0.000746863	0.00121214	0.00191363	0.00293871	0.00438982	0.00637867	0.00901584	0.0123958	0.0165781	0.021567	0.027292	0.033595	0.0402259	0.0468522	0.053082	0.0585001	0.0627132	0.0653963	0.0663347	0.0654517	0.0628193	0.0586487	0.0532619	0.0470508	0.0404306	0.0337945	0.0274773	0.0217318	0.0167189	0.0125117	0.00910781	0.0064492	0.00444211
River	Fraser	P25	171	60	2.5877e-07	5.85214e-07	1.28739e-06	2.75483e-06	5.73422e-06	1.16104e-05	2.2867e-05	4.38093e-05	8.16425e-05	0.000147999	0.000260972	0.000447631	0.000746863	0.00121214	0.00191363	0.00293871	0.00438982	0.00637867	0.00901584	0.0123958	0.0165781	0.021567	0.027292	0.033595	0.0402259	0.0468522	0.053082	0.0585001	0.0627132	0.0653963	0.0663347	0.0654517	0.0628193	0.0586487	0.0532619	0.0470508	0.0404306	0.0337945	0.0274773	0.0217318	0.0167189	0.0125117	0.00910781	0.0064492	0.00444211
River	Miss	P52	234	43	0	0.000113556	0.00022489	0.000225789	0.000336335	0.000447781	0.000892904	0.00078167	0.00111668	0.00167348	0.00189502	0.00278794	0.00423585	0.00523886	0.00713535	0.00992229	0.0128211	0.0170598	0.0215201	0.0276539	0.0332304	0.0393643	0.0453879	0.0508529	0.054981	0.0582138	0.0607785	0.0618919	0.0622218	0.060993	0.0587599	0.054966	0.0498357	0.0437045	0.0362357	0.0297697	0.0229713	0.0175087	0.0130488	0.00948053	0.0068037	0.00501798	0.00334573	0.00223037	0.00156136
River	Miss	P53	235	43	0	0.000113556	0.00022489	0.000225789	0.000336335	0.000447781	0.000892904	0.00078167	0.00111668	0.00167348	0.00189502	0.00278794	0.00423585	0.00523886	0.00713535	0.00992229	0.0128211	0.0170598	0.0215201	0.0276539	0.0332304	0.0393643	0.0453879	0.0508529	0.054981	0.0582138	0.0607785	0.0618919	0.0622218	0.060993	0.0587599	0.054966	0.0498357	0.0437045	0.0362357	0.0297697	0.0229713	0.0175087	0.0130488	0.00948053	0.0068037	0.00501798	0.00334573	0.00223037	0.00156136
River	Miss	P54	236	43	0	0.000113556	0.00022489	0.000225789	0.000336335	0.000447781	0.000892904	0.00078167	0.00111668	0.00167348	0.00189502	0.00278794	0.00423585	0.00523886	0.00713535	0.00992229	0.0128211	0.0170598	0.0215201	0.0276539	0.0332304	0.0393643	0.0453879	0.0508529	0.054981	0.0582138	0.0607785	0.0618919	0.0622218	0.060993	0.0587599	0.054966	0.0498357	0.0437045	0.0362357	0.0297697	0.0229713	0.0175087	0.0130488	0.00948053	0.0068037	0.00501798	0.00334573	0.00223037	0.00156136
River	Miss	P55	237	43	0	0.000113556	0.00022489	0.000225789	0.000336335	0.000447781	0.000892904	0.00078167	0.00111668	0.00167348	0.00189502	0.00278794	0.00423585	0.00523886	0.00713535	0.00992229	0.0128211	0.0170598	0.0215201	0.0276539	0.0332304	0.0393643	0.0453879	0.0508529	0.054981	0.0582138	0.0607785	0.0618919	0.0622218	0.060993	0.0587599	0.054966	0.0498357	0.0437045	0.0362357	0.0297697	0.0229713	0.0175087	0.0130488	0.00948053	0.0068037	0.00501798	0.00334573	0.00223037	0.00156136
River	Miss	P56	238	43	0	0.000113556	0.00022489	0.000225789	0.000336335	0.000447781	0.000892904	0.00078167	0.00111668	0.00167348	0.00189502	0.00278794	0.00423585	0.00523886	0.00713535	0.00992229	0.0128211	0.0170598	0.0215201	0.0276539	0.0332304	0.0393643	0.0453879	0.0508529	0.054981	0.0582138	0.0607785	0.0618919	0.0622218	0.060993	0.0587599	0.054966	0.0498357	0.0437045	0.0362357	0.0297697	0.0229713	0.0175087	0.0130488	0.00948053	0.0068037	0.00501798	0.00334573	0.00223037	0.00156136
River	Miss	P57	239	43	0	0.000113556	0.00022489	0.000225789	0.000336335	0.000447781	0.000892904	0.00078167	0.00111668	0.00167348	0.00189502	0.00278794	0.00423585	0.00523886	0.00713535	0.00992229	0.0128211	0.0170598	0.0215201	0.0276539	0.0332304	0.0393643	0.0453879	0.0508529	0.054981	0.0582138	0.0607785	0.0618919	0.0622218	0.060993	0.0587599	0.054966	0.0498357	0.0437045	0.0362357	0.0297697	0.0229713	0.0175087	0.0130488	0.00948053	0.0068037	0.00501798	0.00334573	0.00223037	0.00156136
River	Miss	P58	240	43	0	0.000113556	0.00022489	0.000225789	0.000336335	0.000447781	0.000892904	0.00078167	0.00111668	0.00167348	0.00189502	0.00278794	0.00423585	0.00523886	0.00713535	0.00992229	0.0128211	0.0170598	0.0215201	0.0276539	0.0332304	0.0393643	0.0453879	0.0508529	0.054981	0.0582138	0.0607785	0.0618919	0.0622218	0.060993	0.0587599	0.054966	0.0498357	0.0437045	0.0362357	0.0297697	0.0229713	0.0175087	0.0130488	0.00948053	0.0068037	0.00501798	0.00334573	0.00223037	0.00156136
River	Miss	P59	241	43	0	0.000113556	0.00022489	0.000225789	0.000336335	0.000447781	0.000892904	0.00078167	0.00111668	0.00167348	0.00189502	0.00278794	0.00423585	0.00523886	0.00713535	0.00992229	0.0128211	0.0170598	0.0215201	0.0276539	0.0332304	0.0393643	0.0453879	0.0508529	0.054981	0.0582138	0.0607785	0.0618919	0.0622218	0.060993	0.0587599	0.054966	0.0498357	0.0437045	0.0362357	0.0297697	0.0229713	0.0175087	0.0130488	0.00948053	0.0068037	0.00501798	0.00334573	0.00223037	0.00156136
River	Miss	P60	242	43	0	0.000113556	0.00022489	0.000225789	0.000336335	0.000447781	0.000892904	0.00078167	0.00111668	0.00167348	0.00189502	0.00278794	0.00423585	0.00523886	0.00713535	0.00992229	0.0128211	0.0170598	0.0215201	0.0276539	0.0332304	0.0393643	0.0453879	0.0508529	0.054981	0.0582138	0.0607785	0.0618919	0.0622218	0.060993	0.0587599	0.054966	0.0498357	0.0437045	0.0362357	0.0297697	0.0229713	0.0175087	0.0130488	0.00948053	0.0068037	0.00501798	0.00334573	0.00223037	0.00156136
[truncated: 15 more columns]

## Sheet: bins
type	River	Profile	Database no	number of bins	Grain size clases (microns)
River	Miss	P1	1	12	2	4	16	62	125	250	500	1000	2000	4000	8000	16000
River	Miss	P2	2	12	2	4	16	62	125	250	500	1000	2000	4000	8000	16000
River	Miss	P3	3	12	2	4	16	62	125	250	500	1000	2000	4000	8000	16000
River	Miss	P4	4	12	2	4	16	62	125	250	500	1000	2000	4000	8000	16000
River	Miss	P5	5	12	2	4	16	62	125	250	500	1000	2000	4000	8000	16000
River	Miss	P6	6	12	2	4	16	62	125	250	500	1000	2000	4000	8000	16000
River	Miss	P7	7	12	2	4	16	62	125	250	500	1000	2000	4000	8000	16000
River	Miss	P8	8	12	2	4	16	62	125	250	500	1000	2000	4000	8000	16000
River	Miss	P9	9	12	2	4	16	62	125	250	500	1000	2000	4000	8000	16000
River	Miss	P10	10	12	2	4	16	62	125	250	500	1000	2000	4000	8000	16000
River	Miss	P11	11	12	2	4	16	62	125	250	500	1000	2000	4000	8000	16000
River	Miss	P12	12	12	2	4	16	62	125	250	500	1000	2000	4000	8000	16000
River	Miss	P13	13	12	2	4	16	62	125	250	500	1000	2000	4000	8000	16000
River	Miss	P14	14	12	2	4	16	62	125	250	500	1000	2000	4000	8000	16000
River	Miss	P15	15	12	2	4	16	62	125	250	500	1000	2000	4000	8000	16000
River	Miss	P16	16	12	2	4	16	62	125	250	500	1000	2000	4000	8000	16000
River	Miss	P17	17	12	2	4	16	62	125	250	500	1000	2000	4000	8000	16000
River	Miss	P18	18	12	2	4	16	62	125	250	500	1000	2000	4000	8000	16000
River	Miss	P19	19	12	2	4	16	62	125	250	500	1000	2000	4000	8000	16000
River	Miss	P20	20	12	2	4	16	62	125	250	500	1000	2000	4000	8000	16000
River	Miss	P21	21	12	2	4	16	62	125	250	500	1000	2000	4000	8000	16000
River	Miss	P22	22	12	2	4	16	62	125	250	500	1000	2000	4000	8000	16000
River	Miss	P23	23	12	2	4	16	62	125	250	500	1000	2000	4000	8000	16000
River	Miss	P24	24	12	2	4	16	62	125	250	500	1000	2000	4000	8000	16000
River	Miss	P25	25	12	2	4	16	62	125	250	500	1000	2000	4000	8000	16000
River	Miss	P26	26	12	2	4	16	62	125	250	500	1000	2000	4000	8000	16000
River	Miss	P27	27	12	2	4	16	62	125	250	500	1000	2000	4000	8000	16000
River	Miss	P28	28	12	2	4	16	62	125	250	500	1000	2000	4000	8000	16000
River	Miss	P29	29	12	2	4	16	62	125	250	500	1000	2000	4000	8000	16000
River	Miss	P30	30	12	2	4	16	62	125	250	500	1000	2000	4000	8000	16000
River	Miss	P31	31	12	2	4	16	62	125	250	500	1000	2000	4000	8000	16000
River	Miss	P32	32	12	2	4	16	62	125	250	500	1000	2000	4000	8000	16000
River	Miss	P33	33	12	2	4	16	62	125	250	500	1000	2000	4000	8000	16000
River	Miss	P34	34	12	2	4	16	62	125	250	500	1000	2000	4000	8000	16000
River	Miss	P35	35	12	2	4	16	62	125	250	500	1000	2000	4000	8000	16000
River	Miss	P36	36	12	2	4	16	62	125	250	500	1000	2000	4000	8000	16000
River	Miss	P37	37	12	2	4	16	62	125	250	500	1000	2000	4000	8000	16000
River	Miss	P38	38	12	2	4	16	62	125	250	500	1000	2000	4000	8000	16000
River	Miss	P39	39	12	2	4	16	62	125	250	500	1000	2000	4000	8000	16000
River	Miss	P40	40	12	2	4	16	62	125	250	500	1000	2000	4000	8000	16000
River	Miss	P41	41	12	2	4	16	62	125	250	500	1000	2000	4000	8000	16000
River	Miss	P42	42	12	2	4	16	62	125	250	500	1000	2000	4000	8000	16000
River	Miss	P43	43	12	2	4	16	62	125	250	500	1000	2000	4000	8000	16000
River	Miss	P44	44	12	2	4	16	62	125	250	500	1000	2000	4000	8000	16000
River	Miss	P45	45	12	2	4	16	62	125	250	500	1000	2000	4000	8000	16000
River	Miss	P46	46	12	2	4	16	62	125	250	500	1000	2000	4000	8000	16000
River	Miss	P47	47	12	2	4	16	62	125	250	500	1000	2000	4000	8000	16000
River	Miss	P48	48	12	2	4	16	62	125	250	500	1000	2000	4000	8000	16000
River	Miss	P49	49	12	2	4	16	62	125	250	500	1000	2000	4000	8000	16000
River	Miss	P50	50	12	2	4	16	62	125	250	500	1000	2000	4000	8000	16000
River	Miss	P51	51	12	2	4	16	62	125	250	500	1000	2000	4000	8000	16000
River	Grand	P1	52	12	2	4	16	62	125	250	500	1000	2000	4000	8000	16000
River	Grand	P2	53	12	2	4	16	62	125	250	500	1000	2000	4000	8000	16000
River	Grand	P3	54	12	2	4	16	62	125	250	500	1000	2000	4000	8000	16000
River	Grand	P4	55	12	2	4	16	62	125	250	500	1000	2000	4000	8000	16000
River	Grand	P5	56	12	2	4	16	62	125	250	500	1000	2000	4000	8000	16000
River	Grand	P6	57	12	2	4	16	62	125	250	500	1000	2000	4000	8000	16000
River	Grand	P7	58	12	2	4	16	62	125	250	500	1000	2000	4000	8000	16000
River	Grand	P8	59	12	2	4	16	62	125	250	500	1000	2000	4000	8000	16000
River	Grand	P9	60	12	2	4	16	62	125	250	500	1000	2000	4000	8000	16000
River	Grand	P10	61	12	2	4	16	62	125	250	500	1000	2000	4000	8000	16000
River	Grand	P11	62	12	2	4	16	62	125	250	500	1000	2000	4000	8000	16000
River	Grand	P12	63	12	2	4	16	62	125	250	500	1000	2000	4000	8000	16000
River	Grand	P13	64	12	2	4	16	62	125	250	500	1000	2000	4000	8000	16000
River	Grand	P14	65	12	2	4	16	62	125	250	500	1000	2000	4000	8000	16000
River	Grand	P15	66	12	2	4	16	62	125	250	500	1000	2000	4000	8000	16000
River	Grand	P16	67	12	2	4	16	62	125	250	500	1000	2000	4000	8000	16000
River	Grand	P17	68	12	2	4	16	62	125	250	500	1000	2000	4000	8000	16000
River	Grand	P18	69	12	2	4	16	62	125	250	500	1000	2000	4000	8000	16000
River	Grand	P19	70	12	2	4	16	62	125	250	500	1000	2000	4000	8000	16000
River	Grand	P20	71	12	2	4	16	62	125	250	500	1000	2000	4000	8000	16000
River	Grand	P21	72	12	2	4	16	62	125	250	500	1000	2000	4000	8000	16000
River	Grand	P22	73	12	2	4	16	62	125	250	500	1000	2000	4000	8000	16000
River	Grand	P23	74	12	2	4	16	62	125	250	500	1000	2000	4000	8000	16000
River	Ganges	P1	75	31	4.5	5.5	6.5	7.5	9	11	13	15.5	18.5	21.5	25	30	37.5	45	52.5	62.5	75	90	105	125	150	180	215	255	305	365	435	515	615	735	875
River	Ganges	P2	76	31	4.5	5.5	6.5	7.5	9	11	13	15.5	18.5	21.5	25	30	37.5	45	52.5	62.5	75	90	105	125	150	180	215	255	305	365	435	515	615	735	875
River	Ganges	P3	77	31	4.5	5.5	6.5	7.5	9	11	13	15.5	18.5	21.5	25	30	37.5	45	52.5	62.5	75	90	105	125	150	180	215	255	305	365	435	515	615	735	875
River	Ganges	P4	78	31	4.5	5.5	6.5	7.5	9	11	13	15.5	18.5	21.5	25	30	37.5	45	52.5	62.5	75	90	105	125	150	180	215	255	305	365	435	515	615	735	875
River	Ganges	P5	79	31	4.5	5.5	6.5	7.5	9	11	13	15.5	18.5	21.5	25	30	37.5	45	52.5	62.5	75	90	105	125	150	180	215	255	305	365	435	515	615	735	875
River	Ganges	P6	80	31	4.5	5.5	6.5	7.5	9	11	13	15.5	18.5	21.5	25	30	37.5	45	52.5	62.5	75	90	105	125	150	180	215	255	305	365	435	515	615	735	875
River	Ganges	P7	81	31	4.5	5.5	6.5	7.5	9	11	13	15.5	18.5	21.5	25	30	37.5	45	52.5	62.5	75	90	105	125	150	180	215	255	305	365	435	515	615	735	875
River	Niobr	P1	82	7	62	125	250	500	1000	2000	4000
River	Niobr	P2	83	7	62	125	250	500	1000	2000	4000
River	Niobr	P3	84	7	62	125	250	500	1000	2000	4000
River	Niobr	P4	85	7	62	125	250	500	1000	2000	4000
River	Niobr	P5	86	7	62	125	250	500	1000	2000	4000
River	Niobr	P6	87	7	62	125	250	500	1000	2000	4000
River	Niobr	P7	88	7	62	125	250	500	1000	2000	4000
River	Niobr	P8	89	7	62	125	250	500	1000	2000	4000
River	Niobr	P9	90	7	62	125	250	500	1000	2000	4000
River	Niobr	P10	91	7	62	125	250	500	1000	2000	4000
River	Loup	P12	92	10	16	31	62	125	250	500	1000	2000	4000	8000
River	Loup	P13	93	10	16	31	62	125	250	500	1000	2000	4000	8000
River	Loup	P14	94	10	16	31	62	125	250	500	1000	2000	4000	8000
River	Loup	P15	95	10	16	31	62	125	250	500	1000	2000	4000	8000
River	Loup	P16	96	10	16	31	62	125	250	500	1000	2000	4000	8000
River	Loup	P17	97	10	16	31	62	125	250	500	1000	2000	4000	8000
River	Loup	P18	98	10	16	31	62	125	250	500	1000	2000	4000	8000
River	Loup	P19	99	10	16	31	62	125	250	500	1000	2000	4000	8000
River	Loup	P20	100	10	16	31	62	125	250	500	1000	2000	4000	8000
River	Loup	P21	101	10	16	31	62	125	250	500	1000	2000	4000	8000
River	Loup	P22	102	10	16	31	62	125	250	500	1000	2000	4000	8000
River	Loup	P23	103	10	16	31	62	125	250	500	1000	2000	4000	8000
River	Loup	P24	104	10	16	31	62	125	250	500	1000	2000	4000	8000
River	Loup	P25	105	10	16	31	62	125	250	500	1000	2000	4000	8000
River	Loup	P26	106	10	16	31	62	125	250	500	1000	2000	4000	8000
River	Loup	P27	107	10	16	31	62	125	250	500	1000	2000	4000	8000
River	Loup	P28	108	10	16	31	62	125	250	500	1000	2000	4000	8000
River	Loup	P29	109	10	16	31	62	125	250	500	1000	2000	4000	8000
River	Loup	P30	110	10	16	31	62	125	250	500	1000	2000	4000	8000
River	Loup	P31	111	10	16	31	62	125	250	500	1000	2000	4000	8000						6						5						4						3						2
River	Yellow	P12	112	51	1	1.1323	1.2822	1.4519	1.6441	1.8616	2.108	2.387	2.7029	3.0607	3.4657	3.9244	4.4438	5.0319	5.6979	6.452	7.3058	8.2727	9.3676	10.607	12.011	13.601	15.401	17.439	19.747	22.361	25.32	28.671	32.466	36.762	41.628	47.137	53.375	60.439	68.438	77.496	87.752	99.366	112.52	127.41	144.27	163.36	184.98	209.47	237.19
River	Yellow	P13	113	51	1	1.1323	1.2822	1.4519	1.6441	1.8616	2.108	2.387	2.7029	3.0607	3.4657	3.9244	4.4438	5.0319	5.6979	6.452	7.3058	8.2727	9.3676	10.607	12.011	13.601	15.401	17.439	19.747	22.361	25.32	28.671	32.466	36.762	41.628	47.137	53.375	60.439	68.438	77.496	87.752	99.366	112.52	127.41	144.27	163.36	184.98	209.47	237.19
River	Yellow	P14	114	51	1	1.1323	1.2822	1.4519	1.6441	1.8616	2.108	2.387	2.7029	3.0607	3.4657	3.9244	4.4438	5.0319	5.6979	6.452	7.3058	8.2727	9.3676	10.607	12.011	13.601	15.401	17.439	19.747	22.361	25.32	28.671	32.466	36.762	41.628	47.137	53.375	60.439	68.438	77.496	87.752	99.366	112.52	127.41	144.27	163.36	184.98	209.47	237.19
River	Yellow	P15	115	51	1	1.1323	1.2822	1.4519	1.6441	1.8616	2.108	2.387	2.7029	3.0607	3.4657	3.9244	4.4438	5.0319	5.6979	6.452	7.3058	8.2727	9.3676	10.607	12.011	13.601	15.401	17.439	19.747	22.361	25.32	28.671	32.466	36.762	41.628	47.137	53.375	60.439	68.438	77.496	87.752	99.366	112.52	127.41	144.27	163.36	184.98	209.47	237.19
River	Yellow	P16	116	51	1	1.1323	1.2822	1.4519	1.6441	1.8616	2.108	2.387	2.7029	3.0607	3.4657	3.9244	4.4438	5.0319	5.6979	6.452	7.3058	8.2727	9.3676	10.607	12.011	13.601	15.401	17.439	19.747	22.361	25.32	28.671	32.466	36.762	41.628	47.137	53.375	60.439	68.438	77.496	87.752	99.366	112.52	127.41	144.27	163.36	184.98	209.47	237.19
River	Yellow	P17	117	51	1	1.1323	1.2822	1.4519	1.6441	1.8616	2.108	2.387	2.7029	3.0607	3.4657	3.9244	4.4438	5.0319	5.6979	6.452	7.3058	8.2727	9.3676	10.607	12.011	13.601	15.401	17.439	19.747	22.361	25.32	28.671	32.466	36.762	41.628	47.137	53.375	60.439	68.438	77.496	87.752	99.366	112.52	127.41	144.27	163.36	184.98	209.47	237.19
River	Yellow	P18	118	51	1	1.1323	1.2822	1.4519	1.6441	1.8616	2.108	2.387	2.7029	3.0607	3.4657	3.9244	4.4438	5.0319	5.6979	6.452	7.3058	8.2727	9.3676	10.607	12.011	13.601	15.401	17.439	19.747	22.361	25.32	28.671	32.466	36.762	41.628	47.137	53.375	60.439	68.438	77.496	87.752	99.366	112.52	127.41	144.27	163.36	184.98	209.47	237.19
River	Yellow	P19	119	51	1	1.1323	1.2822	1.4519	1.6441	1.8616	2.108	2.387	2.7029	3.0607	3.4657	3.9244	4.4438	5.0319	5.6979	6.452	7.3058	8.2727	9.3676	10.607	12.011	13.601	15.401	17.439	19.747	22.361	25.32	28.671	32.466	36.762	41.628	47.137	53.375	60.439	68.438	77.496	87.752	99.366	112.52	127.41	144.27	163.36	184.98	209.47	237.19
River	Yellow	P20	120	51	1	1.1323	1.2822	1.4519	1.6441	1.8616	2.108	2.387	2.7029	3.0607	3.4657	3.9244	4.4438	5.0319	5.6979	6.452	7.3058	8.2727	9.3676	10.607	12.011	13.601	15.401	17.439	19.747	22.361	25.32	28.671	32.466	36.762	41.628	47.137	53.375	60.439	68.438	77.496	87.752	99.366	112.52	127.41	144.27	163.36	184.98	209.47	237.19
River	Yellow	P21	121	51	1	1.1323	1.2822	1.4519	1.6441	1.8616	2.108	2.387	2.7029	3.0607	3.4657	3.9244	4.4438	5.0319	5.6979	6.452	7.3058	8.2727	9.3676	10.607	12.011	13.601	15.401	17.439	19.747	22.361	25.32	28.671	32.466	36.762	41.628	47.137	53.375	60.439	68.438	77.496	87.752	99.366	112.52	127.41	144.27	163.36	184.98	209.47	237.19
River	Yellow	P22	122	51	1	1.1323	1.2822	1.4519	1.6441	1.8616	2.108	2.387	2.7029	3.0607	3.4657	3.9244	4.4438	5.0319	5.6979	6.452	7.3058	8.2727	9.3676	10.607	12.011	13.601	15.401	17.439	19.747	22.361	25.32	28.671	32.466	36.762	41.628	47.137	53.375	60.439	68.438	77.496	87.752	99.366	112.52	127.41	144.27	163.36	184.98	209.47	237.19
River	Yellow	P23	123	51	1	1.1323	1.2822	1.4519	1.6441	1.8616	2.108	2.387	2.7029	3.0607	3.4657	3.9244	4.4438	5.0319	5.6979	6.452	7.3058	8.2727	9.3676	10.607	12.011	13.601	15.401	17.439	19.747	22.361	25.32	28.671	32.466	36.762	41.628	47.137	53.375	60.439	68.438	77.496	87.752	99.366	112.52	127.41	144.27	163.36	184.98	209.47	237.19
River	Yellow	P24	124	51	1	1.1323	1.2822	1.4519	1.6441	1.8616	2.108	2.387	2.7029	3.0607	3.4657	3.9244	4.4438	5.0319	5.6979	6.452	7.3058	8.2727	9.3676	10.607	12.011	13.601	15.401	17.439	19.747	22.361	25.32	28.671	32.466	36.762	41.628	47.137	53.375	60.439	68.438	77.496	87.752	99.366	112.52	127.41	144.27	163.36	184.98	209.47	237.19
River	Yellow	P25	125	51	1	1.1323	1.2822	1.4519	1.6441	1.8616	2.108	2.387	2.7029	3.0607	3.4657	3.9244	4.4438	5.0319	5.6979	6.452	7.3058	8.2727	9.3676	10.607	12.011	13.601	15.401	17.439	19.747	22.361	25.32	28.671	32.466	36.762	41.628	47.137	53.375	60.439	68.438	77.496	87.752	99.366	112.52	127.41	144.27	163.36	184.98	209.47	237.19
River	Yellow	P26	126	51	1	1.1323	1.2822	1.4519	1.6441	1.8616	2.108	2.387	2.7029	3.0607	3.4657	3.9244	4.4438	5.0319	5.6979	6.452	7.3058	8.2727	9.3676	10.607	12.011	13.601	15.401	17.439	19.747	22.361	25.32	28.671	32.466	36.762	41.628	47.137	53.375	60.439	68.438	77.496	87.752	99.366	112.52	127.41	144.27	163.36	184.98	209.47	237.19
River	Yellow	P27	127	51	1	1.1323	1.2822	1.4519	1.6441	1.8616	2.108	2.387	2.7029	3.0607	3.4657	3.9244	4.4438	5.0319	5.6979	6.452	7.3058	8.2727	9.3676	10.607	12.011	13.601	15.401	17.439	19.747	22.361	25.32	28.671	32.466	36.762	41.628	47.137	53.375	60.439	68.438	77.496	87.752	99.366	112.52	127.41	144.27	163.36	184.98	209.47	237.19
River	Yellow	P28	128	51	1	1.1323	1.2822	1.4519	1.6441	1.8616	2.108	2.387	2.7029	3.0607	3.4657	3.9244	4.4438	5.0319	5.6979	6.452	7.3058	8.2727	9.3676	10.607	12.011	13.601	15.401	17.439	19.747	22.361	25.32	28.671	32.466	36.762	41.628	47.137	53.375	60.439	68.438	77.496	87.752	99.366	112.52	127.41	144.27	163.36	184.98	209.47	237.19
River	Yellow	P29	129	51	1	1.1323	1.2822	1.4519	1.6441	1.8616	2.108	2.387	2.7029	3.0607	3.4657	3.9244	4.4438	5.0319	5.6979	6.452	7.3058	8.2727	9.3676	10.607	12.011	13.601	15.401	17.439	19.747	22.361	25.32	28.671	32.466	36.762	41.628	47.137	53.375	60.439	68.438	77.496	87.752	99.366	112.52	127.41	144.27	163.36	184.98	209.47	237.19
River	Yellow	P30	130	51	1	1.1323	1.2822	1.4519	1.6441	1.8616	2.108	2.387	2.7029	3.0607	3.4657	3.9244	4.4438	5.0319	5.6979	6.452	7.3058	8.2727	9.3676	10.607	12.011	13.601	15.401	17.439	19.747	22.361	25.32	28.671	32.466	36.762	41.628	47.137	53.375	60.439	68.438	77.496	87.752	99.366	112.52	127.41	144.27	163.36	184.98	209.47	237.19
River	Yellow	P31	131	51	1	1.1323	1.2822	1.4519	1.6441	1.8616	2.108	2.387	2.7029	3.0607	3.4657	3.9244	4.4438	5.0319	5.6979	6.452	7.3058	8.2727	9.3676	10.607	12.011	13.601	15.401	17.439	19.747	22.361	25.32	28.671	32.466	36.762	41.628	47.137	53.375	60.439	68.438	77.496	87.752	99.366	112.52	127.41	144.27	163.36	184.98	209.47	237.19
River	Yellow	P32	132	51	1	1.1323	1.2822	1.4519	1.6441	1.8616	2.108	2.387	2.7029	3.0607	3.4657	3.9244	4.4438	5.0319	5.6979	6.452	7.3058	8.2727	9.3676	10.607	12.011	13.601	15.401	17.439	19.747	22.361	25.32	28.671	32.466	36.762	41.628	47.137	53.375	60.439	68.438	77.496	87.752	99.366	112.52	127.41	144.27	163.36	184.98	209.47	237.19
River	Yellow	P33	133	51	1	1.1323	1.2822	1.4519	1.6441	1.8616	2.108	2.387	2.7029	3.0607	3.4657	3.9244	4.4438	5.0319	5.6979	6.452	7.3058	8.2727	9.3676	10.607	12.011	13.601	15.401	17.439	19.747	22.361	25.32	28.671	32.466	36.762	41.628	47.137	53.375	60.439	68.438	77.496	87.752	99.366	112.52	127.41	144.27	163.36	184.98	209.47	237.19
River	Yellow	P34	134	51	1	1.1323	1.2822	1.4519	1.6441	1.8616	2.108	2.387	2.7029	3.0607	3.4657	3.9244	4.4438	5.0319	5.6979	6.452	7.3058	8.2727	9.3676	10.607	12.011	13.601	15.401	17.439	19.747	22.361	25.32	28.671	32.466	36.762	41.628	47.137	53.375	60.439	68.438	77.496	87.752	99.366	112.52	127.41	144.27	163.36	184.98	209.47	237.19
River	Yellow	P35	135	51	1	1.1323	1.2822	1.4519	1.6441	1.8616	2.108	2.387	2.7029	3.0607	3.4657	3.9244	4.4438	5.0319	5.6979	6.452	7.3058	8.2727	9.3676	10.607	12.011	13.601	15.401	17.439	19.747	22.361	25.32	28.671	32.466	36.762	41.628	47.137	53.375	60.439	68.438	77.496	87.752	99.366	112.52	127.41	144.27	163.36	184.98	209.47	237.19
River	Yellow	P36	136	51	1	1.1323	1.2822	1.4519	1.6441	1.8616	2.108	2.387	2.7029	3.0607	3.4657	3.9244	4.4438	5.0319	5.6979	6.452	7.3058	8.2727	9.3676	10.607	12.011	13.601	15.401	17.439	19.747	22.361	25.32	28.671	32.466	36.762	41.628	47.137	53.375	60.439	68.438	77.496	87.752	99.366	112.52	127.41	144.27	163.36	184.98	209.47	237.19
River	Yellow	P37	137	51	1	1.1323	1.2822	1.4519	1.6441	1.8616	2.108	2.387	2.7029	3.0607	3.4657	3.9244	4.4438	5.0319	5.6979	6.452	7.3058	8.2727	9.3676	10.607	12.011	13.601	15.401	17.439	19.747	22.361	25.32	28.671	32.466	36.762	41.628	47.137	53.375	60.439	68.438	77.496	87.752	99.366	112.52	127.41	144.27	163.36	184.98	209.47	237.19
River	Yellow	P38	138	51	1	1.1323	1.2822	1.4519	1.6441	1.8616	2.108	2.387	2.7029	3.0607	3.4657	3.9244	4.4438	5.0319	5.6979	6.452	7.3058	8.2727	9.3676	10.607	12.011	13.601	15.401	17.439	19.747	22.361	25.32	28.671	32.466	36.762	41.628	47.137	53.375	60.439	68.438	77.496	87.752	99.366	112.52	127.41	144.27	163.36	184.98	209.47	237.19
River	Yellow	P39	139	51	1	1.1323	1.2822	1.4519	1.6441	1.8616	2.108	2.387	2.7029	3.0607	3.4657	3.9244	4.4438	5.0319	5.6979	6.452	7.3058	8.2727	9.3676	10.607	12.011	13.601	15.401	17.439	19.747	22.361	25.32	28.671	32.466	36.762	41.628	47.137	53.375	60.439	68.438	77.496	87.752	99.366	112.52	127.41	144.27	163.36	184.98	209.47	237.19
River	Yellow	P40	140	51	1	1.1323	1.2822	1.4519	1.6441	1.8616	2.108	2.387	2.7029	3.0607	3.4657	3.9244	4.4438	5.0319	5.6979	6.452	7.3058	8.2727	9.3676	10.607	12.011	13.601	15.401	17.439	19.747	22.361	25.32	28.671	32.466	36.762	41.628	47.137	53.375	60.439	68.438	77.496	87.752	99.366	112.52	127.41	144.27	163.36	184.98	209.47	237.19
River	Yellow	P41	141	51	1	1.1323	1.2822	1.4519	1.6441	1.8616	2.108	2.387	2.7029	3.0607	3.4657	3.9244	4.4438	5.0319	5.6979	6.452	7.3058	8.2727	9.3676	10.607	12.011	13.601	15.401	17.439	19.747	22.361	25.32	28.671	32.466	36.762	41.628	47.137	53.375	60.439	68.438	77.496	87.752	99.366	112.52	127.41	144.27	163.36	184.98	209.47	237.19
River	Yellow	P42	142	51	1	1.1323	1.2822	1.4519	1.6441	1.8616	2.108	2.387	2.7029	3.0607	3.4657	3.9244	4.4438	5.0319	5.6979	6.452	7.3058	8.2727	9.3676	10.607	12.011	13.601	15.401	17.439	19.747	22.361	25.32	28.671	32.466	36.762	41.628	47.137	53.375	60.439	68.438	77.496	87.752	99.366	112.52	127.41	144.27	163.36	184.98	209.47	237.19
River	Yellow	P43	143	51	1	1.1323	1.2822	1.4519	1.6441	1.8616	2.108	2.387	2.7029	3.0607	3.4657	3.9244	4.4438	5.0319	5.6979	6.452	7.3058	8.2727	9.3676	10.607	12.011	13.601	15.401	17.439	19.747	22.361	25.32	28.671	32.466	36.762	41.628	47.137	53.375	60.439	68.438	77.496	87.752	99.366	112.52	127.41	144.27	163.36	184.98	209.47	237.19
River	Yellow	P44	144	51	1	1.1323	1.2822	1.4519	1.6441	1.8616	2.108	2.387	2.7029	3.0607	3.4657	3.9244	4.4438	5.0319	5.6979	6.452	7.3058	8.2727	9.3676	10.607	12.011	13.601	15.401	17.439	19.747	22.361	25.32	28.671	32.466	36.762	41.628	47.137	53.375	60.439	68.438	77.496	87.752	99.366	112.52	127.41	144.27	163.36	184.98	209.47	237.19
River	Yellow	P45	145	51	1	1.1323	1.2822	1.4519	1.6441	1.8616	2.108	2.387	2.7029	3.0607	3.4657	3.9244	4.4438	5.0319	5.6979	6.452	7.3058	8.2727	9.3676	10.607	12.011	13.601	15.401	17.439	19.747	22.361	25.32	28.671	32.466	36.762	41.628	47.137	53.375	60.439	68.438	77.496	87.752	99.366	112.52	127.41	144.27	163.36	184.98	209.47	237.19
River	Yellow	P46	146	51	1	1.1323	1.2822	1.4519	1.6441	1.8616	2.108	2.387	2.7029	3.0607	3.4657	3.9244	4.4438	5.0319	5.6979	6.452	7.3058	8.2727	9.3676	10.607	12.011	13.601	15.401	17.439	19.747	22.361	25.32	28.671	32.466	36.762	41.628	47.137	53.375	60.439	68.438	77.496	87.752	99.366	112.52	127.41	144.27	163.36	184.98	209.47	237.19
River	Fraser	P1	147	60	2.246	2.6523	3.1321	3.6987	4.36779	5.15793	6.091	7.19286	8.49405	10.0306	11.8452	13.988	16.5184	19.5065	23.0353	27.2024	32.1233	37.9344	44.7967	52.9004	62.4701	73.7709	87.1161	102.875	121.486	143.462	169.415	200.062	236.253	278.991	329.461	389.06	459.441	542.554	640.702	756.605	893.475	1055.1	1245.97	1471.37	1737.54	2051.86	2423.04	2861.37	3378.99
River	Fraser	P2	148	60	2.246	2.6523	3.1321	3.6987	4.36779	5.15793	6.091	7.19286	8.49405	10.0306	11.8452	13.988	16.5184	19.5065	23.0353	27.2024	32.1233	37.9344	44.7967	52.9004	62.4701	73.7709	87.1161	102.875	121.486	143.462	169.415	200.062	236.253	278.991	329.461	389.06	459.441	542.554	640.702	756.605	893.475	1055.1	1245.97	1471.37	1737.54	2051.86	2423.04	2861.37	3378.99
River	Fraser	P3	149	60	2.246	2.6523	3.1321	3.6987	4.36779	5.15793	6.091	7.19286	8.49405	10.0306	11.8452	13.988	16.5184	19.5065	23.0353	27.2024	32.1233	37.9344	44.7967	52.9004	62.4701	73.7709	87.1161	102.875	121.486	143.462	169.415	200.062	236.253	278.991	329.461	389.06	459.441	542.554	640.702	756.605	893.475	1055.1	1245.97	1471.37	1737.54	2051.86	2423.04	2861.37	3378.99
River	Fraser	P4	150	60	2.246	2.6523	3.1321	3.6987	4.36779	5.15793	6.091	7.19286	8.49405	10.0306	11.8452	13.988	16.5184	19.5065	23.0353	27.2024	32.1233	37.9344	44.7967	52.9004	62.4701	73.7709	87.1161	102.875	121.486	143.462	169.415	200.062	236.253	278.991	329.461	389.06	459.441	542.554	640.702	756.605	893.475	1055.1	1245.97	1471.37	1737.54	2051.86	2423.04	2861.37	3378.99
River	Fraser	P5	151	60	2.246	2.6523	3.1321	3.6987	4.36779	5.15793	6.091	7.19286	8.49405	10.0306	11.8452	13.988	16.5184	19.5065	23.0353	27.2024	32.1233	37.9344	44.7967	52.9004	62.4701	73.7709	87.1161	102.875	121.486	143.462	169.415	200.062	236.253	278.991	329.461	389.06	459.441	542.554	640.702	756.605	893.475	1055.1	1245.97	1471.37	1737.54	2051.86	2423.04	2861.37	3378.99
River	Fraser	P6	152	60	2.246	2.6523	3.1321	3.6987	4.36779	5.15793	6.091	7.19286	8.49405	10.0306	11.8452	13.988	16.5184	19.5065	23.0353	27.2024	32.1233	37.9344	44.7967	52.9004	62.4701	73.7709	87.1161	102.875	121.486	143.462	169.415	200.062	236.253	278.991	329.461	389.06	459.441	542.554	640.702	756.605	893.475	1055.1	1245.97	1471.37	1737.54	2051.86	2423.04	2861.37	3378.99
River	Fraser	P7	153	60	2.246	2.6523	3.1321	3.6987	4.36779	5.15793	6.091	7.19286	8.49405	10.0306	11.8452	13.988	16.5184	19.5065	23.0353	27.2024	32.1233	37.9344	44.7967	52.9004	62.4701	73.7709	87.1161	102.875	121.486	143.462	169.415	200.062	236.253	278.991	329.461	389.06	459.441	542.554	640.702	756.605	893.475	1055.1	1245.97	1471.37	1737.54	2051.86	2423.04	2861.37	3378.99
River	Fraser	P8	154	60	2.246	2.6523	3.1321	3.6987	4.36779	5.15793	6.091	7.19286	8.49405	10.0306	11.8452	13.988	16.5184	19.5065	23.0353	27.2024	32.1233	37.9344	44.7967	52.9004	62.4701	73.7709	87.1161	102.875	121.486	143.462	169.415	200.062	236.253	278.991	329.461	389.06	459.441	542.554	640.702	756.605	893.475	1055.1	1245.97	1471.37	1737.54	2051.86	2423.04	2861.37	3378.99
River	Fraser	P9	155	60	2.246	2.6523	3.1321	3.6987	4.36779	5.15793	6.091	7.19286	8.49405	10.0306	11.8452	13.988	16.5184	19.5065	23.0353	27.2024	32.1233	37.9344	44.7967	52.9004	62.4701	73.7709	87.1161	102.875	121.486	143.462	169.415	200.062	236.253	278.991	329.461	389.06	459.441	542.554	640.702	756.605	893.475	1055.1	1245.97	1471.37	1737.54	2051.86	2423.04	2861.37	3378.99
River	Fraser	P10	156	60	2.246	2.6523	3.1321	3.6987	4.36779	5.15793	6.091	7.19286	8.49405	10.0306	11.8452	13.988	16.5184	19.5065	23.0353	27.2024	32.1233	37.9344	44.7967	52.9004	62.4701	73.7709	87.1161	102.875	121.486	143.462	169.415	200.062	236.253	278.991	329.461	389.06	459.441	542.554	640.702	756.605	893.475	1055.1	1245.97	1471.37	1737.54	2051.86	2423.04	2861.37	3378.99
River	Fraser	P11	157	60	2.246	2.6523	3.1321	3.6987	4.36779	5.15793	6.091	7.19286	8.49405	10.0306	11.8452	13.988	16.5184	19.5065	23.0353	27.2024	32.1233	37.9344	44.7967	52.9004	62.4701	73.7709	87.1161	102.875	121.486	143.462	169.415	200.062	236.253	278.991	329.461	389.06	459.441	542.554	640.702	756.605	893.475	1055.1	1245.97	1471.37	1737.54	2051.86	2423.04	2861.37	3378.99
River	Fraser	P12	158	60	2.246	2.6523	3.1321	3.6987	4.36779	5.15793	6.091	7.19286	8.49405	10.0306	11.8452	13.988	16.5184	19.5065	23.0353	27.2024	32.1233	37.9344	44.7967	52.9004	62.4701	73.7709	87.1161	102.875	121.486	143.462	169.415	200.062	236.253	278.991	329.461	389.06	459.441	542.554	640.702	756.605	893.475	1055.1	1245.97	1471.37	1737.54	2051.86	2423.04	2861.37	3378.99
River	Fraser	P13	159	60	2.246	2.6523	3.1321	3.6987	4.36779	5.15793	6.091	7.19286	8.49405	10.0306	11.8452	13.988	16.5184	19.5065	23.0353	27.2024	32.1233	37.9344	44.7967	52.9004	62.4701	73.7709	87.1161	102.875	121.486	143.462	169.415	200.062	236.253	278.991	329.461	389.06	459.441	542.554	640.702	756.605	893.475	1055.1	1245.97	1471.37	1737.54	2051.86	2423.04	2861.37	3378.99
River	Fraser	P14	160	60	2.246	2.6523	3.1321	3.6987	4.36779	5.15793	6.091	7.19286	8.49405	10.0306	11.8452	13.988	16.5184	19.5065	23.0353	27.2024	32.1233	37.9344	44.7967	52.9004	62.4701	73.7709	87.1161	102.875	121.486	143.462	169.415	200.062	236.253	278.991	329.461	389.06	459.441	542.554	640.702	756.605	893.475	1055.1	1245.97	1471.37	1737.54	2051.86	2423.04	2861.37	3378.99
River	Fraser	P15	161	60	2.246	2.6523	3.1321	3.6987	4.36779	5.15793	6.091	7.19286	8.49405	10.0306	11.8452	13.988	16.5184	19.5065	23.0353	27.2024	32.1233	37.9344	44.7967	52.9004	62.4701	73.7709	87.1161	102.875	121.486	143.462	169.415	200.062	236.253	278.991	329.461	389.06	459.441	542.554	640.702	756.605	893.475	1055.1	1245.97	1471.37	1737.54	2051.86	2423.04	2861.37	3378.99
River	Fraser	P16	162	60	2.246	2.6523	3.1321	3.6987	4.36779	5.15793	6.091	7.19286	8.49405	10.0306	11.8452	13.988	16.5184	19.5065	23.0353	27.2024	32.1233	37.9344	44.7967	52.9004	62.4701	73.7709	87.1161	102.875	121.486	143.462	169.415	200.062	236.253	278.991	329.461	389.06	459.441	542.554	640.702	756.605	893.475	1055.1	1245.97	1471.37	1737.54	2051.86	2423.04	2861.37	3378.99
River	Fraser	P17	163	60	2.246	2.6523	3.1321	3.6987	4.36779	5.15793	6.091	7.19286	8.49405	10.0306	11.8452	13.988	16.5184	19.5065	23.0353	27.2024	32.1233	37.9344	44.7967	52.9004	62.4701	73.7709	87.1161	102.875	121.486	143.462	169.415	200.062	236.253	278.991	329.461	389.06	459.441	542.554	640.702	756.605	893.475	1055.1	1245.97	1471.37	1737.54	2051.86	2423.04	2861.37	3378.99
River	Fraser	P18	164	60	2.246	2.6523	3.1321	3.6987	4.36779	5.15793	6.091	7.19286	8.49405	10.0306	11.8452	13.988	16.5184	19.5065	23.0353	27.2024	32.1233	37.9344	44.7967	52.9004	62.4701	73.7709	87.1161	102.875	121.486	143.462	169.415	200.062	236.253	278.991	329.461	389.06	459.441	542.554	640.702	756.605	893.475	1055.1	1245.97	1471.37	1737.54	2051.86	2423.04	2861.37	3378.99
River	Fraser	P19	165	60	2.246	2.6523	3.1321	3.6987	4.36779	5.15793	6.091	7.19286	8.49405	10.0306	11.8452	13.988	16.5184	19.5065	23.0353	27.2024	32.1233	37.9344	44.7967	52.9004	62.4701	73.7709	87.1161	102.875	121.486	143.462	169.415	200.062	236.253	278.991	329.461	389.06	459.441	542.554	640.702	756.605	893.475	1055.1	1245.97	1471.37	1737.54	2051.86	2423.04	2861.37	3378.99
River	Fraser	P20	166	60	2.246	2.6523	3.1321	3.6987	4.36779	5.15793	6.091	7.19286	8.49405	10.0306	11.8452	13.988	16.5184	19.5065	23.0353	27.2024	32.1233	37.9344	44.7967	52.9004	62.4701	73.7709	87.1161	102.875	121.486	143.462	169.415	200.062	236.253	278.991	329.461	389.06	459.441	542.554	640.702	756.605	893.475	1055.1	1245.97	1471.37	1737.54	2051.86	2423.04	2861.37	3378.99
River	Fraser	P21	167	60	2.246	2.6523	3.1321	3.6987	4.36779	5.15793	6.091	7.19286	8.49405	10.0306	11.8452	13.988	16.5184	19.5065	23.0353	27.2024	32.1233	37.9344	44.7967	52.9004	62.4701	73.7709	87.1161	102.875	121.486	143.462	169.415	200.062	236.253	278.991	329.461	389.06	459.441	542.554	640.702	756.605	893.475	1055.1	1245.97	1471.37	1737.54	2051.86	2423.04	2861.37	3378.99
River	Fraser	P22	168	60	2.246	2.6523	3.1321	3.6987	4.36779	5.15793	6.091	7.19286	8.49405	10.0306	11.8452	13.988	16.5184	19.5065	23.0353	27.2024	32.1233	37.9344	44.7967	52.9004	62.4701	73.7709	87.1161	102.875	121.486	143.462	169.415	200.062	236.253	278.991	329.461	389.06	459.441	542.554	640.702	756.605	893.475	1055.1	1245.97	1471.37	1737.54	2051.86	2423.04	2861.37	3378.99
River	Fraser	P23	169	60	2.246	2.6523	3.1321	3.6987	4.36779	5.15793	6.091	7.19286	8.49405	10.0306	11.8452	13.988	16.5184	19.5065	23.0353	27.2024	32.1233	37.9344	44.7967	52.9004	62.4701	73.7709	87.1161	102.875	121.486	143.462	169.415	200.062	236.253	278.991	329.461	389.06	459.441	542.554	640.702	756.605	893.475	1055.1	1245.97	1471.37	1737.54	2051.86	2423.04	2861.37	3378.99
River	Fraser	P24	170	60	2.246	2.6523	3.1321	3.6987	4.36779	5.15793	6.091	7.19286	8.49405	10.0306	11.8452	13.988	16.5184	19.5065	23.0353	27.2024	32.1233	37.9344	44.7967	52.9004	62.4701	73.7709	87.1161	102.875	121.486	143.462	169.415	200.062	236.253	278.991	329.461	389.06	459.441	542.554	640.702	756.605	893.475	1055.1	1245.97	1471.37	1737.54	2051.86	2423.04	2861.37	3378.99
River	Fraser	P25	171	60	2.246	2.6523	3.1321	3.6987	4.36779	5.15793	6.091	7.19286	8.49405	10.0306	11.8452	13.988	16.5184	19.5065	23.0353	27.2024	32.1233	37.9344	44.7967	52.9004	62.4701	73.7709	87.1161	102.875	121.486	143.462	169.415	200.062	236.253	278.991	329.461	389.06	459.441	542.554	640.702	756.605	893.475	1055.1	1245.97	1471.37	1737.54	2051.86	2423.04	2861.37	3378.99
River	Miss	P52	234	43	2	64.5	67.5	70.5	74	77.5	81	85	89	93	97.5	102	106.5	112	117.5	123	129	135	141	147.5	154.5	162	169.5	177.5	186	194.5	203.5	213	223.5	234	245	256.5	268.5	281.5	294.5	308	322.5	338	354	370.5	388	406.5	425.5
River	Miss	P53	235	43	2	64.5	67.5	70.5	74	77.5	81	85	89	93	97.5	102	106.5	112	117.5	123	129	135	141	147.5	154.5	162	169.5	177.5	186	194.5	203.5	213	223.5	234	245	256.5	268.5	281.5	294.5	308	322.5	338	354	370.5	388	406.5	425.5
River	Miss	P54	236	43	2	64.5	67.5	70.5	74	77.5	81	85	89	93	97.5	102	106.5	112	117.5	123	129	135	141	147.5	154.5	162	169.5	177.5	186	194.5	203.5	213	223.5	234	245	256.5	268.5	281.5	294.5	308	322.5	338	354	370.5	388	406.5	425.5
River	Miss	P55	237	43	2	64.5	67.5	70.5	74	77.5	81	85	89	93	97.5	102	106.5	112	117.5	123	129	135	141	147.5	154.5	162	169.5	177.5	186	194.5	203.5	213	223.5	234	245	256.5	268.5	281.5	294.5	308	322.5	338	354	370.5	388	406.5	425.5
River	Miss	P56	238	43	2	64.5	67.5	70.5	74	77.5	81	85	89	93	97.5	102	106.5	112	117.5	123	129	135	141	147.5	154.5	162	169.5	177.5	186	194.5	203.5	213	223.5	234	245	256.5	268.5	281.5	294.5	308	322.5	338	354	370.5	388	406.5	425.5
River	Miss	P57	239	43	2	64.5	67.5	70.5	74	77.5	81	85	89	93	97.5	102	106.5	112	117.5	123	129	135	141	147.5	154.5	162	169.5	177.5	186	194.5	203.5	213	223.5	234	245	256.5	268.5	281.5	294.5	308	322.5	338	354	370.5	388	406.5	425.5
River	Miss	P58	240	43	2	64.5	67.5	70.5	74	77.5	81	85	89	93	97.5	102	106.5	112	117.5	123	129	135	141	147.5	154.5	162	169.5	177.5	186	194.5	203.5	213	223.5	234	245	256.5	268.5	281.5	294.5	308	322.5	338	354	370.5	388	406.5	425.5
River	Miss	P59	241	43	2	64.5	67.5	70.5	74	77.5	81	85	89	93	97.5	102	106.5	112	117.5	123	129	135	141	147.5	154.5	162	169.5	177.5	186	194.5	203.5	213	223.5	234	245	256.5	268.5	281.5	294.5	308	322.5	338	354	370.5	388	406.5	425.5
River	Miss	P60	242	43	2	64.5	67.5	70.5	74	77.5	81	85	89	93	97.5	102	106.5	112	117.5	123	129	135	141	147.5	154.5	162	169.5	177.5	186	194.5	203.5	213	223.5	234	245	256.5	268.5	281.5	294.5	308	322.5	338	354	370.5	388	406.5	425.5
[truncated: 15 more columns]
