# Supplementary material for: Entrainment and suspension of sand and gravel
Source: Copernicus journal article supplement (doi:10.5194/esurf-8-485-2020), 2020-06-03
Supplement: Supplementary file 1 [file esurf-8-485-2020-supplement.zip › Table_S2.xlsx]

## Sheet: Rouse_1parameter
ranking	rsquared	parameter	A	e1
1	0.330643	u*/ws	1.00203	-0.461206
2	0.226634	u*_skin/ws	0.71913	-0.375655
3	0.118829	Rp_skin	0.251834	0.376747
4	0.108417	tau	0.555325	-0.23113
5	0.0766677	Cf	0.154615	-0.193824
6	0.0400643	tau_sk	0.441588	-0.152029
7	0.0358367	Rp	0.318396	0.177597
8	0.017384	Ca/S	0.49594	0.0459835
9	0.0121041	Fr	0.558379	0.0975301
10	0.004217	S	0.354874	-0.0286026
11	0.00343514	Ca	0.546325	0.0148855
12	0.00190051	H/D50	0.386648	0.0181459
13	0.000197136	Rep	0.469072	-0.00851955

## Sheet: Rouse_2parameter
ranking	rsquared	parameter1	parameter2	A	e1	e2
1	0.400324	Cf	u*_skin/ws	0.143282	-0.302374	-0.46535
2	0.400324	u*_skin/ws	Cf	0.143282	-0.46535	-0.302374
3	0.390691	Rep	u*/ws	1.35378	-0.161006	-0.539809
4	0.390691	u*/ws	Rep	1.35378	-0.539809	-0.161006
5	0.38394	Cf	u*/ws	0.38906	-0.162146	-0.446101
6	0.38394	u*/ws	Cf	0.38906	-0.446101	-0.162146
7	0.381438	Ca/S	u*/ws	1.17599	0.0795479	-0.490119
8	0.381438	u*/ws	Ca/S	1.17599	-0.490119	0.0795479
9	0.380644	Ca/S	u*_skin/ws	1.07379	0.153739	-0.534586
10	0.380644	u*_skin/ws	Ca/S	1.07379	-0.534586	0.153739
11	0.3751	Rep	u*_skin/ws	1.29256	-0.297038	-0.610516
12	0.3751	u*_skin/ws	Rep	1.29256	-0.610516	-0.297038
13	0.356467	H/D50	u*/ws	0.523455	0.0682376	-0.487275
14	0.356467	u*/ws	H/D50	0.523455	-0.487275	0.0682376
15	0.346307	S	u*/ws	0.604172	-0.0554424	-0.47165
16	0.346307	u*/ws	S	0.604172	-0.47165	-0.0554424
17	0.343861	u*_skin/ws	u*/ws	1.08917	0.219502	-0.664345
18	0.343861	u*/ws	u*_skin/ws	1.08917	-0.664345	0.219502
19	0.34363	Rp	u*/ws	1.4237	-0.123516	-0.514066
20	0.34363	u*/ws	Rp	1.4237	-0.514066	-0.123516
21	0.34125	tau_sk	u*/ws	1.1192	0.0904692	-0.509269
22	0.34125	u*/ws	tau_sk	1.1192	-0.509269	0.0904692
23	0.338833	Ca	u*/ws	1.29462	0.0230058	-0.465205
24	0.338833	u*/ws	Ca	1.29462	-0.465205	0.0230058
25	0.33518	Rp_skin	u*/ws	1.28527	-0.101005	-0.511997
26	0.33518	u*/ws	Rp_skin	1.28527	-0.511997	-0.101005
27	0.33296	u*/ws	tau	0.99494	-0.438903	-0.0390146
28	0.33296	tau	u*/ws	0.99494	-0.0390146	-0.438903
29	0.331071	Fr	u*/ws	1.03314	0.01858	-0.45859
30	0.331071	u*/ws	Fr	1.03314	-0.45859	0.01858
31	0.279919	Ca	u*_skin/ws	1.52111	0.0621576	-0.440226
32	0.279919	u*_skin/ws	Ca	1.52111	-0.440226	0.0621576
33	0.270431	Rp	u*_skin/ws	1.57652	-0.278083	-0.541339
34	0.270431	u*_skin/ws	Rp	1.57652	-0.541339	-0.278083
35	0.264006	Fr	u*_skin/ws	1.028	0.173912	-0.401878
36	0.264006	u*_skin/ws	Fr	1.028	-0.401878	0.173912
37	0.25494	u*_skin/ws	tau	0.746647	-0.324122	-0.126654
38	0.25494	tau	u*_skin/ws	0.746647	-0.126654	-0.324122
39	0.251149	u*_skin/ws	tau_sk	0.862634	-0.485998	0.159395
40	0.251149	tau_sk	u*_skin/ws	0.862634	0.159395	-0.485998
41	0.247794	Cf	Rp	0.0189524	-0.388046	0.467363
42	0.247794	Rp	Cf	0.0189524	0.467363	-0.388046
43	0.23579	Rp_skin	Cf	0.0568707	0.442724	-0.243098
44	0.23579	Cf	Rp_skin	0.0568707	-0.243098	0.442724
45	0.230698	H/D50	u*_skin/ws	0.550573	0.026555	-0.377831
46	0.230698	u*_skin/ws	H/D50	0.550573	-0.377831	0.026555
47	0.230695	S	u*_skin/ws	0.551687	-0.0280638	-0.375534
48	0.230695	u*_skin/ws	S	0.551687	-0.375534	-0.0280638
49	0.230209	Rep	Rp_skin	0.195994	-0.275729	0.709767
50	0.230209	Rp_skin	Rep	0.195994	0.709767	-0.275729
51	0.227433	Rp_skin	u*_skin/ws	0.655618	0.042091	-0.355019
52	0.227433	u*_skin/ws	Rp_skin	0.655618	-0.355019	0.042091
53	0.207855	Rp_skin	tau	0.311202	0.346143	-0.21036
54	0.207855	tau	Rp_skin	0.311202	-0.21036	0.346143
55	0.169168	Ca/S	Rp_skin	0.254752	0.0807085	0.439477
56	0.169168	Rp_skin	Ca/S	0.254752	0.439477	0.0807085
57	0.168644	Rp	Rep	0.140988	0.784246	-0.452819
58	0.168644	Rep	Rp	0.140988	-0.452819	0.784246
59	0.166893	Rp_skin	Rp	0.308042	0.792723	-0.412135
60	0.166893	Rp	Rp_skin	0.308042	-0.412135	0.792723
61	0.156251	Rp_skin	S	0.0983864	0.461587	-0.0850505
62	0.156251	S	Rp_skin	0.0983864	-0.0850505	0.461587
63	0.154347	Rp	tau	0.364474	0.201652	-0.242276
64	0.154347	tau	Rp	0.364474	-0.242276	0.201652
65	0.149438	Cf	tau_sk	0.11226	-0.237678	-0.210314
66	0.149438	tau_sk	Cf	0.11226	-0.210314	-0.237678
67	0.143456	Rp_skin	tau_sk	0.250775	0.354384	-0.120175
68	0.143456	tau_sk	Rp_skin	0.250775	-0.120175	0.354384
69	0.137832	Rep	Cf	0.0480453	0.209554	-0.360657
70	0.137832	Cf	Rep	0.0480453	-0.360657	0.209554
71	0.135919	H/D50	Rp_skin	0.134517	0.0560727	0.412308
72	0.135919	Rp_skin	H/D50	0.134517	0.412308	0.0560727
73	0.127624	Fr	tau	0.704704	0.123322	-0.239445
74	0.127624	tau	Fr	0.704704	-0.239445	0.123322
75	0.125125	tau	Cf	0.294453	-0.178527	-0.104581
76	0.125125	Cf	tau	0.294453	-0.104581	-0.178527
77	0.123496	Ca	tau	0.793466	0.0317273	-0.247633
78	0.123496	tau	Ca	0.793466	-0.247633	0.0317273
79	0.12165	Ca	Rp_skin	0.291958	0.0134832	0.375792
80	0.12165	Rp_skin	Ca	0.291958	0.375792	0.0134832
81	0.1213	Ca/S	Rp	0.252454	0.124121	0.368482
82	0.1213	Rp	Ca/S	0.252454	0.368482	0.124121
83	0.121169	Ca/S	tau	0.58489	0.0394178	-0.226445
84	0.121169	tau	Ca/S	0.58489	-0.226445	0.0394178
85	0.119754	Fr	Rp_skin	0.26878	0.0277269	0.368773
86	0.119754	Rp_skin	Fr	0.26878	0.368773	0.0277269
87	0.11373	S	tau	0.786433	0.0350405	-0.253461
88	0.11373	tau	S	0.786433	-0.253461	0.0350405
89	0.110541	H/D50	tau	0.684453	-0.019913	-0.240034
90	0.110541	tau	H/D50	0.684453	-0.240034	-0.019913
91	0.110202	Rep	tau	0.542324	0.0261327	-0.236171
92	0.110202	tau	Rep	0.542324	-0.236171	0.0261327
93	0.108951	tau_sk	tau	0.546919	-0.020981	-0.220463
94	0.108951	tau	tau_sk	0.546919	-0.220463	-0.020981
95	0.10632	Fr	tau_sk	0.70394	0.27036	-0.27613
96	0.10632	tau_sk	Fr	0.70394	-0.27613	0.27036
97	0.102843	Ca/S	tau_sk	0.49059	0.0981158	-0.249422
98	0.102843	tau_sk	Ca/S	0.49059	-0.249422	0.0981158
99	0.0819612	Ca	tau_sk	0.840088	0.0625374	-0.256191
100	0.0819612	tau_sk	Ca	0.840088	-0.256191	0.0625374
101	0.0790216	Ca/S	Cf	0.129103	-0.0214393	-0.220262
102	0.0790216	Cf	Ca/S	0.129103	-0.220262	-0.0214393
103	0.0773674	Cf	S	0.167531	-0.200168	0.0123183
104	0.0773674	S	Cf	0.167531	0.0123183	-0.200168
105	0.0773674	S	Fr	0.167533	-0.187848	0.400329
106	0.0773674	Fr	S	0.167533	0.400329	-0.187848
107	0.0773674	Fr	Cf	0.167512	0.0246142	-0.187863
108	0.0773674	Cf	Fr	0.167512	-0.187863	0.0246142
109	0.0770611	H/D50	Cf	0.165428	-0.00846868	-0.197057
110	0.0770611	Cf	H/D50	0.165428	-0.197057	-0.00846868
111	0.0768621	Ca	Cf	0.146395	-0.00366751	-0.196431
112	0.0768621	Cf	Ca	0.146395	-0.196431	-0.00366751
113	0.0636861	H/D50	Fr	0.182965	0.161637	0.376916
114	0.0636861	Fr	H/D50	0.182965	0.376916	0.161637
115	0.057792	Rp	tau_sk	0.337416	0.131594	-0.118556
116	0.057792	tau_sk	Rp	0.337416	-0.118556	0.131594
117	0.0574841	Fr	Rp	0.386855	0.132716	0.203283
118	0.0574841	Rp	Fr	0.386855	0.203283	0.132716
119	0.0515839	Ca	Rp	0.421386	0.0336219	0.217223
120	0.0515839	Rp	Ca	0.421386	0.217223	0.0336219
121	0.0455932	Rep	tau_sk	0.461614	-0.0473627	-0.168846
122	0.0455932	tau_sk	Rep	0.461614	-0.168846	-0.0473627
123	0.0455007	Rp	S	0.203332	0.193424	-0.0439405
124	0.0455007	S	Rp	0.203332	-0.0439405	0.193424
125	0.0405168	H/D50	tau_sk	0.484623	-0.00933903	-0.157452
126	0.0405168	tau_sk	H/D50	0.484623	-0.157452	-0.00933903
127	0.0402689	S	tau_sk	0.470296	0.00683247	-0.156626
128	0.0402689	tau_sk	S	0.470296	-0.156626	0.00683247
129	0.0381889	H/D50	Rp	0.258711	0.0202007	0.178786
130	0.0381889	Rp	H/D50	0.258711	0.178786	0.0202007
131	0.0277866	Ca/S	Rep	0.47491	0.0785894	0.0844819
132	0.0277866	Rep	Ca/S	0.47491	0.0844819	0.0785894
133	0.0250789	Ca/S	Ca	0.345136	0.0901939	-0.0391599
134	0.0250789	Ca	Ca/S	0.345136	-0.0391599	0.0901939
135	0.0250789	Ca/S	S	0.345071	0.0510239	-0.0391817
136	0.0250789	S	Ca/S	0.345071	-0.0391817	0.0510239
137	0.0250789	S	Ca	0.345132	-0.0901719	0.0510112
138	0.0250789	Ca	S	0.345132	0.0510112	-0.0901719
139	0.0223095	Ca/S	H/D50	0.369051	0.0507354	0.0297662
140	0.0223095	H/D50	Ca/S	0.369051	0.0297662	0.0507354
141	0.0193561	Ca/S	Fr	0.534283	0.0356348	0.0473339
142	0.0193561	Fr	Ca/S	0.534283	0.0473339	0.0356348
143	0.0174066	Ca	Fr	0.461686	-0.0368197	0.208796
144	0.0174066	Fr	Ca	0.461686	0.208796	-0.0368197
145	0.0167236	Ca	H/D50	0.377194	0.0425022	0.065992
146	0.0167236	H/D50	Ca	0.377194	0.065992	0.0425022
147	0.0123331	Fr	Rep	0.55661	0.101199	0.00955978
148	0.0123331	Rep	Fr	0.55661	0.00955978	0.101199
149	0.00747686	S	H/D50	0.373284	-0.104177	-0.0752459
150	0.00747686	H/D50	S	0.373284	-0.0752459	-0.104177
151	0.00422338	Rep	S	0.35609	-0.00156226	-0.028416
152	0.00422338	S	Rep	0.35609	-0.028416	-0.00156226
153	0.0035269	Ca	Rep	0.548722	0.0159052	0.00634065
154	0.0035269	Rep	Ca	0.548722	0.00634065	0.0159052
155	0.00196602	H/D50	Rep	0.390566	0.0176732	-0.00499464
156	0.00196602	Rep	H/D50	0.390566	-0.00499464	0.0176732

## Sheet: Rouse_3parameter
ranking	rsquared	parameter1	parameter2	parameter3	A	e1	e2	e3
1	0.44185	u*/ws	Ca	H/D50	0.513016	-0.553875	0.105871	0.194257
2	0.44185	u*/ws	H/D50	Ca	0.513016	-0.553875	0.194257	0.105871
3	0.435086	u*_skin/ws	Ca/S	Cf	0.300749	-0.529437	0.089333	-0.207068
4	0.435086	u*_skin/ws	Cf	Ca/S	0.300749	-0.529437	-0.207068	0.089333
5	0.433034	u*_skin/ws	tau_sk	Rep	1.857	-0.814402	0.250326	-0.33587
6	0.433034	u*_skin/ws	Rep	tau_sk	1.857	-0.814402	-0.33587	0.250326
7	0.429184	u*/ws	Ca/S	H/D50	0.49232	-0.533107	0.0977938	0.0953524
8	0.429184	u*/ws	H/D50	Ca/S	0.49232	-0.533107	0.0953524	0.0977938
9	0.426708	u*_skin/ws	Fr	H/D50	0.15002	-0.507667	0.716033	0.302054
10	0.426708	u*_skin/ws	H/D50	Fr	0.15002	-0.507667	0.302054	0.716033
11	0.424945	u*_skin/ws	Rp_skin	Rep	0.675765	-0.495375	0.371964	-0.382618
12	0.424945	u*_skin/ws	Rep	Rp_skin	0.675765	-0.495375	-0.382618	0.371964
13	0.424225	u*_skin/ws	Ca	Cf	0.268107	-0.502933	0.0423969	-0.280707
14	0.424225	u*_skin/ws	Cf	Ca	0.268107	-0.502933	-0.280707	0.0423969
15	0.423698	u*/ws	Rp	Rep	0.667113	-0.473547	0.376848	-0.355778
16	0.423698	u*/ws	Rep	Rp	0.667113	-0.473547	-0.355778	0.376848
17	0.421227	u*_skin/ws	Cf	tau	0.083564	-0.55216	-0.395353	0.14551
18	0.421227	u*_skin/ws	tau	Cf	0.083564	-0.55216	0.14551	-0.395353
19	0.420827	u*/ws	Fr	H/D50	0.24419	-0.489056	0.384629	0.214853
20	0.420827	u*/ws	H/D50	Fr	0.24419	-0.489056	0.214853	0.384629
21	0.420051	u*_skin/ws	Ca/S	Rep	1.34776	-0.626184	0.100578	-0.185344
22	0.420051	u*_skin/ws	Rep	Ca/S	1.34776	-0.626184	-0.185344	0.100578
23	0.417689	u*_skin/ws	Rep	Cf	0.311784	-0.549885	-0.141878	-0.209144
24	0.417689	u*_skin/ws	Cf	Rep	0.311784	-0.549885	-0.209144	-0.141878
25	0.416544	u*_skin/ws	Cf	tau_sk	0.172122	-0.553319	-0.295809	0.129975
26	0.416544	u*_skin/ws	tau_sk	Cf	0.172122	-0.553319	0.129975	-0.295809
27	0.411329	u*/ws	H/D50	Rep	0.747035	-0.559886	0.0611624	-0.154287
28	0.411329	u*/ws	Rep	H/D50	0.747035	-0.559886	-0.154287	0.0611624
29	0.410122	u*/ws	Ca	S	0.599488	-0.508533	0.0906951	-0.166992
30	0.410122	u*/ws	S	Ca	0.599488	-0.508533	-0.166992	0.0906951
31	0.410122	u*/ws	Ca/S	S	0.599439	-0.508516	0.0906936	-0.0763022
32	0.410122	u*/ws	S	Ca/S	0.599439	-0.508516	-0.0763022	0.0906936
33	0.410122	u*/ws	Ca/S	Ca	0.599438	-0.508535	0.167009	-0.0763059
34	0.410122	u*/ws	Ca	Ca/S	0.599438	-0.508535	-0.0763059	0.167009
35	0.406996	u*_skin/ws	Cf	S	0.183554	-0.471816	-0.323613	0.0382237
36	0.406996	u*_skin/ws	S	Cf	0.183554	-0.471816	0.0382237	-0.323613
37	0.406996	u*_skin/ws	Fr	Cf	0.183546	-0.471823	0.076449	-0.285399
38	0.406996	u*_skin/ws	Cf	Fr	0.183546	-0.471823	-0.285399	0.076449
39	0.406996	u*_skin/ws	Fr	S	0.183561	-0.47181	0.647206	-0.285382
40	0.406996	u*_skin/ws	S	Fr	0.183561	-0.47181	-0.285382	0.647206
41	0.406741	u*_skin/ws	H/D50	Ca/S	0.556857	-0.55612	0.0692862	0.16919
42	0.406741	u*_skin/ws	Ca/S	H/D50	0.556857	-0.55612	0.16919	0.0692862
43	0.404049	u*_skin/ws	Ca	H/D50	0.596375	-0.567446	0.167762	0.219607
44	0.404049	u*_skin/ws	H/D50	Ca	0.596375	-0.567446	0.219607	0.167762
45	0.402373	u*/ws	Rp_skin	Rep	0.903473	-0.463314	0.206771	-0.217244
46	0.402373	u*/ws	Rep	Rp_skin	0.903473	-0.463314	-0.217244	0.206771
47	0.401251	u*_skin/ws	H/D50	Cf	0.158957	-0.465823	-0.01301	-0.30745
48	0.401251	u*_skin/ws	Cf	H/D50	0.158957	-0.465823	-0.30745	-0.01301
49	0.401136	u*/ws	Ca/S	Fr	0.978348	-0.525385	0.116048	-0.156478
50	0.401136	u*/ws	Fr	Ca/S	0.978348	-0.525385	-0.156478	0.116048
51	0.400958	u*_skin/ws	Rp_skin	Cf	0.13203	-0.446829	0.0375933	-0.302221
52	0.400958	u*_skin/ws	Cf	Rp_skin	0.13203	-0.446829	-0.302221	0.0375933
53	0.400762	u*_skin/ws	Rp	Cf	0.12381	-0.448515	0.0331436	-0.312218
54	0.400762	u*_skin/ws	Cf	Rp	0.12381	-0.448515	-0.312218	0.0331436
55	0.400467	u*/ws	Cf	u*_skin/ws	0.156332	-0.0390755	-0.290617	-0.426858
56	0.400467	u*_skin/ws	Cf	u*/ws	0.156332	-0.426858	-0.290617	-0.0390755
57	0.400467	u*_skin/ws	u*/ws	Cf	0.156332	-0.426858	-0.0390755	-0.290617
58	0.400467	u*/ws	u*_skin/ws	Cf	0.156332	-0.0390755	-0.426858	-0.290617
59	0.40041	u*/ws	H/D50	tau_sk	0.419292	-0.619036	0.118752	0.21178
60	0.40041	u*/ws	tau_sk	H/D50	0.419292	-0.619036	0.21178	0.118752
61	0.400324	u*_skin/ws	Cf	Cf	0.14329	-0.465341	0.533097	-0.835461
62	0.400324	u*_skin/ws	Cf	u*_skin/ws	0.143281	0.430922	-0.302385	-0.896291
63	0.400324	u*_skin/ws	u*_skin/ws	Cf	0.143281	0.430922	-0.896291	-0.302385
64	0.399631	u*_skin/ws	Ca	S	0.615244	-0.544688	0.163755	-0.225494
65	0.399631	u*_skin/ws	S	Ca	0.615244	-0.544688	-0.225494	0.163755
66	0.399631	u*_skin/ws	Ca/S	S	0.615253	-0.544693	0.163755	-0.0617387
67	0.399631	u*_skin/ws	S	Ca/S	0.615253	-0.544693	-0.0617387	0.163755
68	0.399631	u*_skin/ws	Ca/S	Ca	0.615283	-0.544695	0.225489	-0.0617342
69	0.399631	u*_skin/ws	Ca	Ca/S	0.615283	-0.544695	-0.0617342	0.225489
70	0.398642	u*/ws	Rep	S	0.924633	-0.542973	-0.152065	-0.039953
71	0.398642	u*/ws	S	Rep	0.924633	-0.542973	-0.039953	-0.152065
72	0.397782	u*_skin/ws	Rep	u*/ws	1.3782	-0.21163	-0.212494	-0.370232
73	0.397782	u*/ws	Rep	u*_skin/ws	1.3782	-0.370232	-0.212494	-0.21163
74	0.397782	u*_skin/ws	u*/ws	Rep	1.3782	-0.21163	-0.370232	-0.212494
75	0.397782	u*/ws	u*_skin/ws	Rep	1.3782	-0.370232	-0.21163	-0.212494
76	0.397553	u*_skin/ws	Rp	Rep	0.69692	-0.534781	0.320949	-0.443055
77	0.397553	u*_skin/ws	Rep	Rp	0.69692	-0.534781	-0.443055	0.320949
78	0.397345	u*/ws	Ca/S	Rep	1.33636	-0.530089	0.0389559	-0.11214
79	0.397345	u*/ws	Rep	Ca/S	1.33636	-0.530089	-0.11214	0.0389559
80	0.396062	u*/ws	Rep	tau_sk	1.4492	-0.571355	-0.155022	0.0649004
81	0.396062	u*/ws	tau_sk	Rep	1.4492	-0.571355	0.0649004	-0.155022
82	0.395395	u*/ws	Fr	Rep	1.25367	-0.557204	-0.0656611	-0.17769
83	0.395395	u*/ws	Rep	Fr	1.25367	-0.557204	-0.17769	-0.0656611
84	0.395294	u*/ws	H/D50	Cf	0.279094	-0.465725	0.0467079	-0.142896
85	0.395294	u*/ws	Cf	H/D50	0.279094	-0.465725	-0.142896	0.0467079
86	0.395159	u*/ws	Rep	tau	1.4252	-0.584869	-0.182619	0.0603927
87	0.395159	u*/ws	tau	Rep	1.4252	-0.584869	0.0603927	-0.182619
88	0.394639	u*/ws	Rep	Cf	0.812617	-0.507879	-0.109146	-0.0708672
89	0.394639	u*/ws	Cf	Rep	0.812617	-0.507879	-0.0708672	-0.109146
90	0.394473	u*_skin/ws	Ca	Rep	1.9513	-0.628837	0.0387013	-0.269397
91	0.394473	u*_skin/ws	Rep	Ca	1.9513	-0.628837	-0.269397	0.0387013
92	0.394249	u*/ws	Ca/S	Cf	0.602694	-0.468479	0.0464991	-0.103165
93	0.394249	u*/ws	Cf	Ca/S	0.602694	-0.468479	-0.103165	0.0464991
94	0.391812	u*/ws	Cf	tau	0.314113	-0.491028	-0.201473	0.0850541
95	0.391812	u*/ws	tau	Cf	0.314113	-0.491028	0.0850541	-0.201473
96	0.390752	u*/ws	Ca	Rep	1.32708	-0.540511	-0.0021638	-0.163246
97	0.390752	u*/ws	Rep	Ca	1.32708	-0.540511	-0.163246	-0.0021638
98	0.390691	u*/ws	Rep	u*/ws	1.35387	1.01764	-0.161009	-1.55748
99	0.390691	u*/ws	u*/ws	Rep	1.35387	1.01764	-1.55748	-0.161009
100	0.390691	u*/ws	Rep	Rep	1.35375	-0.53981	-0.0135672	-0.147444
101	0.389525	u*_skin/ws	Ca/S	u*/ws	1.14654	-0.267323	0.117418	-0.256445
102	0.389525	u*/ws	Ca/S	u*_skin/ws	1.14654	-0.256445	0.117418	-0.267323
103	0.389525	u*_skin/ws	u*/ws	Ca/S	1.14654	-0.267323	-0.256445	0.117418
104	0.389525	u*/ws	u*_skin/ws	Ca/S	1.14654	-0.256445	-0.267323	0.117418
105	0.389082	u*/ws	H/D50	u*_skin/ws	0.461728	-0.837303	0.09606	0.366731
106	0.389082	u*_skin/ws	H/D50	u*/ws	0.461728	0.366731	0.09606	-0.837303
107	0.389082	u*_skin/ws	u*/ws	H/D50	0.461728	0.366731	-0.837303	0.09606
108	0.389082	u*/ws	u*_skin/ws	H/D50	0.461728	-0.837303	0.366731	0.09606
109	0.389063	u*_skin/ws	Fr	Rep	1.55672	-0.61201	0.108538	-0.278288
110	0.389063	u*_skin/ws	Rep	Fr	1.55672	-0.61201	-0.278288	0.108538
111	0.388012	u*/ws	Cf	Rp	0.230332	-0.401004	-0.205215	0.0959556
112	0.388012	u*/ws	Rp	Cf	0.230332	-0.401004	0.0959556	-0.205215
113	0.386487	u*/ws	Cf	S	0.337318	-0.45176	-0.149477	-0.0237398
114	0.386487	u*/ws	S	Cf	0.337318	-0.45176	-0.0237398	-0.149477
115	0.386487	u*/ws	S	Fr	0.337307	-0.451738	-0.173218	0.298962
116	0.386487	u*/ws	Fr	S	0.337307	-0.451738	0.298962	-0.173218
117	0.386487	u*/ws	Fr	Cf	0.337373	-0.451756	-0.0474327	-0.173204
118	0.386487	u*/ws	Cf	Fr	0.337373	-0.451756	-0.173204	-0.0474327
119	0.385369	u*_skin/ws	Ca/S	tau_sk	1.14652	-0.577796	0.147405	0.0718679
120	0.385369	u*_skin/ws	tau_sk	Ca/S	1.14652	-0.577796	0.0718679	0.147405
121	0.385032	u*/ws	tau_sk	Cf	0.422133	-0.463039	0.0305617	-0.154564
122	0.385032	u*/ws	Cf	tau_sk	0.422133	-0.463039	-0.154564	0.0305617
123	0.384859	u*_skin/ws	Ca/S	tau	1.06993	-0.506551	0.146592	-0.0507779
124	0.384859	u*_skin/ws	tau	Ca/S	1.06993	-0.506551	-0.0507779	0.146592
125	0.384849	u*/ws	Ca	Cf	0.439853	-0.448027	0.00795238	-0.156291
126	0.384849	u*/ws	Cf	Ca	0.439853	-0.448027	-0.156291	0.00795238
127	0.384411	u*/ws	S	tau_sk	0.480694	-0.587683	-0.107296	0.200025
128	0.384411	u*/ws	tau_sk	S	0.480694	-0.587683	0.200025	-0.107296
129	0.384152	u*_skin/ws	Ca/S	Rp	1.33233	-0.575316	0.143761	-0.0856314
130	0.384152	u*_skin/ws	Rp	Ca/S	1.33233	-0.575316	-0.0856314	0.143761
131	0.383974	u*/ws	Rp_skin	Cf	0.377231	-0.441292	0.00926678	-0.163515
132	0.383974	u*/ws	Cf	Rp_skin	0.377231	-0.441292	-0.163515	0.00926678
133	0.38394	u*/ws	Cf	Cf	0.389078	-0.446098	0.618471	-0.780607
134	0.38394	u*/ws	Cf	u*/ws	0.389082	0.509585	-0.162137	-0.955698
135	0.38394	u*/ws	u*/ws	Cf	0.389082	0.509585	-0.955698	-0.162137
136	0.382012	u*/ws	Rp_skin	Ca/S	1.28269	-0.507896	-0.0366313	0.0778729
137	0.382012	u*/ws	Ca/S	Rp_skin	1.28269	-0.507896	0.0778729	-0.0366313
138	0.381811	u*/ws	Rp	Ca/S	1.10393	-0.480881	0.0256311	0.084343
139	0.381811	u*/ws	Ca/S	Rp	1.10393	-0.480881	0.084343	0.0256311
140	0.381587	u*/ws	Ca/S	tau	1.17217	-0.484116	0.0788457	-0.0100258
141	0.381587	u*/ws	tau	Ca/S	1.17217	-0.484116	-0.0100258	0.0788457
142	0.381454	u*/ws	tau_sk	Ca/S	1.18	-0.49194	0.00394219	0.0788494
143	0.381454	u*/ws	Ca/S	tau_sk	1.18	-0.49194	0.0788494	0.00394219
144	0.381438	u*/ws	Ca/S	u*/ws	1.17596	-0.960998	0.0795429	0.470909
145	0.381438	u*/ws	u*/ws	Ca/S	1.17596	-0.960998	0.470909	0.0795429
146	0.381438	u*/ws	Ca/S	Ca/S	1.17593	-0.490065	-0.070344	0.149899
147	0.381018	u*_skin/ws	Fr	Ca/S	1.00801	-0.535109	-0.040154	0.162603
148	0.381018	u*_skin/ws	Ca/S	Fr	1.00801	-0.535109	0.162603	-0.040154
149	0.380644	u*_skin/ws	Ca/S	u*_skin/ws	1.07376	0.0673421	0.153723	-0.601931
150	0.380644	u*_skin/ws	u*_skin/ws	Ca/S	1.07376	0.0673421	-0.601931	0.153723
151	0.380644	u*_skin/ws	Ca/S	Ca/S	1.0738	-0.534603	-0.0512909	0.205028
152	0.380225	u*_skin/ws	Rp_skin	Ca/S	1.02915	-0.522831	0.0108307	0.147782
153	0.380225	u*_skin/ws	Ca/S	Rp_skin	1.02915	-0.522831	0.147782	0.0108307
154	0.37687	u*_skin/ws	Rep	tau	1.33037	-0.641707	-0.317246	0.0373504
155	0.37687	u*_skin/ws	tau	Rep	1.33037	-0.641707	0.0373504	-0.317246
156	0.375689	u*_skin/ws	Rep	S	1.44597	-0.613983	-0.30136	0.0109723
157	0.375689	u*_skin/ws	S	Rep	1.44597	-0.613983	0.0109723	-0.30136
158	0.375183	u*_skin/ws	Rep	H/D50	1.24137	-0.610002	-0.295992	0.00381245
159	0.375183	u*_skin/ws	H/D50	Rep	1.24137	-0.610002	0.00381245	-0.295992
160	0.3751	u*_skin/ws	Rep	u*_skin/ws	1.29244	0.20188	-0.296985	-0.812342
161	0.3751	u*_skin/ws	u*_skin/ws	Rep	1.29244	0.20188	-0.812342	-0.296985
162	0.3751	u*_skin/ws	Rep	Rep	1.29241	-0.610446	-0.330598	0.033578
163	0.37294	u*/ws	H/D50	Rp	0.744423	-0.548856	0.0729638	-0.139653
164	0.37294	u*/ws	Rp	H/D50	0.744423	-0.548856	-0.139653	0.0729638
165	0.368397	u*_skin/ws	S	u*/ws	0.58366	0.291957	-0.0713847	-0.744874
166	0.368397	u*/ws	S	u*_skin/ws	0.58366	-0.744874	-0.0713847	0.291957
167	0.368397	u*_skin/ws	u*/ws	S	0.58366	0.291957	-0.744874	-0.0713847
168	0.368397	u*/ws	u*_skin/ws	S	0.58366	-0.744874	0.291957	-0.0713847
169	0.363119	u*/ws	S	H/D50	0.60113	-0.515519	0.188448	0.234611
170	0.363119	u*/ws	H/D50	S	0.60113	-0.515519	0.234611	0.188448
171	0.358406	u*/ws	H/D50	Rp_skin	0.633717	-0.519749	0.0654326	-0.0667446
172	0.358406	u*/ws	Rp_skin	H/D50	0.633717	-0.519749	-0.0667446	0.0654326
173	0.357021	u*/ws	H/D50	tau	0.502141	-0.501153	0.0730086	0.0211491
174	0.357021	u*/ws	tau	H/D50	0.502141	-0.501153	0.0211491	0.0730086
175	0.356467	u*/ws	u*/ws	H/D50	0.523443	-0.497189	0.00991867	0.0682406
176	0.356467	u*/ws	H/D50	u*/ws	0.523443	-0.497189	0.0682406	0.00991867
177	0.356467	u*/ws	H/D50	H/D50	0.523508	-0.487284	0.569257	-0.50103
178	0.355868	u*/ws	Rp	S	0.885391	-0.518202	-0.110144	-0.0480604
179	0.355868	u*/ws	S	Rp	0.885391	-0.518202	-0.0480604	-0.110144
180	0.35523	u*/ws	Fr	Ca	1.7204	-0.510952	-0.247576	0.0851026
181	0.35523	u*/ws	Ca	Fr	1.7204	-0.510952	0.0851026	-0.247576
182	0.354504	u*_skin/ws	u*/ws	Fr	0.94013	0.450942	-0.898685	-0.142898
183	0.354504	u*_skin/ws	Fr	u*/ws	0.94013	0.450942	-0.142898	-0.898685
184	0.354504	u*/ws	Fr	u*_skin/ws	0.94013	-0.898685	-0.142898	0.450942
185	0.354504	u*/ws	u*_skin/ws	Fr	0.94013	-0.898685	0.450942	-0.142898
186	0.353157	u*/ws	Rp_skin	tau_sk	1.79396	-0.615341	-0.174156	0.125357
187	0.353157	u*/ws	tau_sk	Rp_skin	1.79396	-0.615341	0.125357	-0.174156
188	0.35243	u*/ws	Rp	tau_sk	1.53763	-0.55439	-0.115014	0.0827122
189	0.35243	u*/ws	tau_sk	Rp	1.53763	-0.55439	0.0827122	-0.115014
190	0.350607	u*/ws	tau_sk	tau	1.13861	-0.475223	0.119616	-0.0844692
191	0.350607	u*/ws	tau	tau_sk	1.13861	-0.475223	-0.0844692	0.119616
192	0.347164	u*/ws	Fr	tau_sk	1.03532	-0.560481	-0.0994118	0.16051
193	0.347164	u*/ws	tau_sk	Fr	1.03532	-0.560481	0.16051	-0.0994118
194	0.346804	u*/ws	Rp_skin	S	0.684707	-0.489027	-0.0360271	-0.0514617
195	0.346804	u*/ws	S	Rp_skin	0.684707	-0.489027	-0.0514617	-0.0360271
196	0.346731	u*/ws	S	tau	0.576113	-0.483918	-0.0610492	0.0195964
197	0.346731	u*/ws	tau	S	0.576113	-0.483918	0.0195964	-0.0610492
198	0.346695	u*/ws	Ca	Rp	1.58212	-0.507531	0.0149441	-0.102067
199	0.346695	u*/ws	Rp	Ca	1.58212	-0.507531	-0.102067	0.0149441
200	0.346307	u*/ws	S	S	0.604251	-0.471681	0.448424	-0.503859
201	0.346307	u*/ws	S	u*/ws	0.604226	-0.627639	-0.0554346	0.155979
202	0.346307	u*/ws	u*/ws	S	0.604226	-0.627639	0.155979	-0.0554346
203	0.346018	u*_skin/ws	Rp_skin	Rp	1.2888	-0.481788	0.613259	-0.684188
204	0.346018	u*_skin/ws	Rp	Rp_skin	1.2888	-0.481788	-0.684188	0.613259
205	0.346018	u*/ws	Rp_skin	Rp	1.28887	-0.481801	0.131447	-0.202394
206	0.346018	u*/ws	Rp	Rp_skin	1.28887	-0.481801	-0.202394	0.131447
207	0.346018	u*/ws	Rp	u*_skin/ws	1.28878	-0.61326	-0.0709288	0.131472
208	0.346018	u*/ws	u*_skin/ws	Rp	1.28878	-0.61326	0.131472	-0.0709288
209	0.346018	u*_skin/ws	u*/ws	Rp	1.28878	0.131472	-0.61326	-0.0709288
210	0.346018	u*_skin/ws	Rp	u*/ws	1.28878	0.131472	-0.0709288	-0.61326
211	0.346018	u*_skin/ws	Rp_skin	u*/ws	1.28872	0.202437	-0.0709059	-0.684207
212	0.346018	u*_skin/ws	u*/ws	Rp_skin	1.28872	0.202437	-0.684207	-0.0709059
213	0.346018	u*/ws	Rp_skin	u*_skin/ws	1.28872	-0.684207	-0.0709059	0.202437
214	0.346018	u*/ws	u*_skin/ws	Rp_skin	1.28872	-0.684207	0.202437	-0.0709059
215	0.34583	u*/ws	u*_skin/ws	tau_sk	1.12861	-0.633729	0.158902	0.0479195
216	0.34583	u*_skin/ws	tau_sk	u*/ws	1.12861	0.158902	0.0479195	-0.633729
217	0.34583	u*/ws	tau_sk	u*_skin/ws	1.12861	-0.633729	0.0479195	0.158902
218	0.34583	u*_skin/ws	u*/ws	tau_sk	1.12861	0.158902	-0.633729	0.0479195
219	0.344347	u*/ws	Ca	Rp_skin	1.73127	-0.521568	0.0244028	-0.111626
220	0.344347	u*/ws	Rp_skin	Ca	1.73127	-0.521568	-0.111626	0.0244028
221	0.344217	u*_skin/ws	tau	u*/ws	1.08205	0.209782	-0.0158378	-0.646313
222	0.344217	u*_skin/ws	u*/ws	tau	1.08205	0.209782	-0.646313	-0.0158378
223	0.344217	u*/ws	u*_skin/ws	tau	1.08205	-0.646313	0.209782	-0.0158378
224	0.344217	u*/ws	tau	u*_skin/ws	1.08205	-0.646313	-0.0158378	0.209782
225	0.344111	u*_skin/ws	u*/ws	Ca	1.146	0.190917	-0.638888	0.0055384
226	0.344111	u*_skin/ws	Ca	u*/ws	1.146	0.190917	0.0055384	-0.638888
227	0.344111	u*/ws	Ca	u*_skin/ws	1.146	-0.638888	0.0055384	0.190917
228	0.344111	u*/ws	u*_skin/ws	Ca	1.146	-0.638888	0.190917	0.0055384
229	0.343861	u*_skin/ws	u*_skin/ws	u*/ws	1.08918	0.0139114	0.205581	-0.664355
230	0.343861	u*_skin/ws	u*/ws	u*_skin/ws	1.08918	0.0139114	-0.664355	0.205581
231	0.343861	u*/ws	u*_skin/ws	u*_skin/ws	1.08918	-0.664355	0.0139114	0.205581
232	0.343861	u*_skin/ws	u*/ws	u*/ws	1.08915	0.219479	0.0537803	-0.718098
233	0.343861	u*/ws	u*_skin/ws	u*/ws	1.08915	0.0537803	0.219479	-0.718098
234	0.343861	u*/ws	u*/ws	u*_skin/ws	1.08915	0.0537803	-0.718098	0.219479
235	0.343849	u*/ws	Rp	Fr	1.41207	-0.51827	-0.128669	-0.0139331
236	0.343849	u*/ws	Fr	Rp	1.41207	-0.51827	-0.0139331	-0.128669
237	0.343632	u*/ws	Rp	tau	1.42686	-0.515062	-0.124205	0.00118883
238	0.343632	u*/ws	tau	Rp	1.42686	-0.515062	0.00118883	-0.124205
239	0.34363	u*/ws	Rp	Rp	1.42387	-0.514088	0.450887	-0.574434
240	0.34363	u*/ws	u*/ws	Rp	1.42386	-0.47255	-0.0415509	-0.123527
241	0.34363	u*/ws	Rp	u*/ws	1.42386	-0.47255	-0.123527	-0.0415509
242	0.343204	u*/ws	Ca	tau	1.32815	-0.434621	0.0261899	-0.0545435
243	0.343204	u*/ws	tau	Ca	1.32815	-0.434621	-0.0545435	0.0261899
244	0.342451	u*/ws	Ca	tau_sk	1.23108	-0.4987	0.0111418	0.0668793
245	0.342451	u*/ws	tau_sk	Ca	1.23108	-0.4987	0.0668793	0.0111418
246	0.34125	u*/ws	u*/ws	tau_sk	1.11926	-0.770273	0.260984	0.0904984
247	0.34125	u*/ws	tau_sk	u*/ws	1.11926	-0.770273	0.0904984	0.260984
248	0.34125	u*/ws	tau_sk	tau_sk	1.11929	-0.509285	0.170515	-0.0800051
249	0.338833	u*/ws	Ca	u*/ws	1.29471	0.0186958	0.0230067	-0.483933
250	0.338833	u*/ws	u*/ws	Ca	1.29471	0.0186958	-0.483933	0.0230067
251	0.338833	u*/ws	Ca	Ca	1.29469	-0.46523	0.508485	-0.485477
252	0.336274	u*/ws	Fr	Rp_skin	1.38065	-0.512225	0.0301746	-0.109911
253	0.336274	u*/ws	Rp_skin	Fr	1.38065	-0.512225	-0.109911	0.0301746
254	0.33573	u*/ws	Rp_skin	tau	1.23369	-0.49259	-0.0859331	-0.0206794
255	0.33573	u*/ws	tau	Rp_skin	1.23369	-0.49259	-0.0206794	-0.0859331
256	0.33518	u*/ws	Rp_skin	u*/ws	1.28531	-0.174331	-0.101025	-0.337664
257	0.33518	u*/ws	u*/ws	Rp_skin	1.28531	-0.174331	-0.337664	-0.101025
258	0.33518	u*/ws	Rp_skin	Rp_skin	1.28544	-0.512018	-0.186211	0.0851492
259	0.333887	u*/ws	Fr	tau	1.04067	-0.432247	0.0278381	-0.0438226
260	0.333887	u*/ws	tau	Fr	1.04067	-0.432247	-0.0438226	0.0278381
261	0.33296	u*/ws	u*/ws	tau	0.994962	2.75173	-3.19065	-0.0390183
262	0.33296	u*/ws	tau	u*/ws	0.994962	2.75173	-0.0390183	-3.19065
263	0.33296	u*/ws	tau	tau	0.995009	-0.438941	-0.0847331	0.0457214
264	0.331071	u*/ws	Fr	u*/ws	1.03314	-2.01468	0.0185727	1.55608
265	0.331071	u*/ws	u*/ws	Fr	1.03314	-2.01468	1.55608	0.0185727
266	0.331071	u*/ws	Fr	Fr	1.0332	-0.458583	-0.00908819	0.0276941
267	0.323083	u*_skin/ws	Rp	tau_sk	2.72792	-0.767383	-0.373401	0.244738
268	0.323083	u*_skin/ws	tau_sk	Rp	2.72792	-0.767383	0.244738	-0.373401
269	0.321387	u*_skin/ws	tau_sk	tau	1.07282	-0.48751	0.292671	-0.222593
270	0.321387	u*_skin/ws	tau	tau_sk	1.07282	-0.48751	-0.222593	0.292671
271	0.314693	u*_skin/ws	Ca	tau	1.66153	-0.38687	0.0660239	-0.140831
272	0.314693	u*_skin/ws	tau	Ca	1.66153	-0.38687	-0.140831	0.0660239
273	0.313097	u*_skin/ws	Ca	Rp	2.81292	-0.579142	0.056053	-0.243877
274	0.313097	u*_skin/ws	Rp	Ca	2.81292	-0.579142	-0.243877	0.056053
275	0.294056	u*_skin/ws	Fr	tau	1.07758	-0.349304	0.178002	-0.130563
276	0.294056	u*_skin/ws	tau	Fr	1.07758	-0.349304	-0.130563	0.178002
277	0.286334	u*_skin/ws	Fr	Rp	1.45755	-0.478942	0.195004	-0.101799
278	0.286334	u*_skin/ws	Rp	Fr	1.45755	-0.478942	-0.101799	0.195004
279	0.283132	u*_skin/ws	Ca	Rp_skin	1.9879	-0.490555	0.0678984	-0.0903034
280	0.283132	u*_skin/ws	Rp_skin	Ca	1.9879	-0.490555	-0.0903034	0.0678984
281	0.282696	u*_skin/ws	Ca	tau_sk	1.45496	-0.476029	0.052183	0.0673344
282	0.282696	u*_skin/ws	tau_sk	Ca	1.45496	-0.476029	0.0673344	0.052183
283	0.280155	u*_skin/ws	Ca	Fr	1.56818	-0.443597	0.0694587	-0.0279969
284	0.280155	u*_skin/ws	Fr	Ca	1.56818	-0.443597	-0.0279969	0.0694587
285	0.280106	u*_skin/ws	S	tau_sk	0.424671	-0.558691	-0.0878069	0.265044
286	0.280106	u*_skin/ws	tau_sk	S	0.424671	-0.558691	0.265044	-0.0878069
287	0.279919	u*_skin/ws	Ca	Ca	1.52131	-0.440232	0.646534	-0.584364
288	0.279919	u*_skin/ws	Ca	u*_skin/ws	1.52118	-0.369866	0.0621597	-0.0703693
289	0.279919	u*_skin/ws	u*_skin/ws	Ca	1.52118	-0.369866	-0.0703693	0.0621597
290	0.275758	u*_skin/ws	Rp	tau	1.37029	-0.481868	-0.221736	-0.0635728
291	0.275758	u*_skin/ws	tau	Rp	1.37029	-0.481868	-0.0635728	-0.221736
292	0.274946	u*_skin/ws	H/D50	tau_sk	0.456702	-0.548858	0.0725819	0.24189
293	0.274946	u*_skin/ws	tau_sk	H/D50	0.456702	-0.548858	0.24189	0.0725819
294	0.274651	u*_skin/ws	H/D50	Rp	1.20249	-0.54375	0.0270605	-0.278583
295	0.274651	u*_skin/ws	Rp	H/D50	1.20249	-0.54375	-0.278583	0.0270605
296	0.270615	u*_skin/ws	Rp	S	1.46863	-0.538598	-0.273574	-0.00615865
297	0.270615	u*_skin/ws	S	Rp	1.46863	-0.538598	-0.00615865	-0.273574
298	0.270431	u*_skin/ws	Rp	u*_skin/ws	1.57654	-1.24055	-0.278085	0.699237
299	0.270431	u*_skin/ws	u*_skin/ws	Rp	1.57654	-1.24055	0.699237	-0.278085
300	0.270431	u*_skin/ws	Rp	Rp	1.57639	-0.541303	-0.0978454	-0.180208
301	0.26952	u*_skin/ws	Fr	Rp_skin	1.46409	-0.469566	0.210744	-0.126475
302	0.26952	u*_skin/ws	Rp_skin	Fr	1.46409	-0.469566	-0.126475	0.210744
303	0.267072	u*_skin/ws	tau_sk	Fr	1.03483	-0.444269	0.068914	0.138868
304	0.267072	u*_skin/ws	Fr	tau_sk	1.03483	-0.444269	0.138868	0.068914
305	0.264006	u*_skin/ws	Fr	u*_skin/ws	1.02805	0.0581433	0.173931	-0.460021
306	0.264006	u*_skin/ws	u*_skin/ws	Fr	1.02805	0.0581433	-0.460021	0.173931
307	0.264006	u*_skin/ws	Fr	Fr	1.02806	-0.401902	-0.00777923	0.181716
308	0.25834	u*_skin/ws	Rp_skin	tau	0.665185	-0.297361	0.0518296	-0.128151
309	0.25834	u*_skin/ws	tau	Rp_skin	0.665185	-0.297361	-0.128151	0.0518296
310	0.257567	u*_skin/ws	Rp_skin	tau_sk	1.27978	-0.600367	-0.148338	0.219371
311	0.257567	u*_skin/ws	tau_sk	Rp_skin	1.27978	-0.600367	0.219371	-0.148338
312	0.255117	u*_skin/ws	H/D50	tau	0.703473	-0.325859	0.00583033	-0.123494
313	0.255117	u*_skin/ws	tau	H/D50	0.703473	-0.325859	-0.123494	0.00583033
314	0.254985	u*_skin/ws	tau	S	0.779434	-0.326551	-0.125533	0.00433552
315	0.254985	u*_skin/ws	S	tau	0.779434	-0.326551	0.00433552	-0.125533
316	0.25494	u*_skin/ws	u*_skin/ws	tau	0.74665	0.0923044	-0.416369	-0.126695
317	0.25494	u*_skin/ws	tau	u*_skin/ws	0.74665	0.0923044	-0.126695	-0.416369
318	0.25494	u*_skin/ws	tau	tau	0.746663	-0.324103	-0.178945	0.0522177
319	0.251149	u*_skin/ws	u*_skin/ws	tau_sk	0.86262	0.46237	-0.948338	0.159389
320	0.251149	u*_skin/ws	tau_sk	u*_skin/ws	0.86262	0.46237	0.159389	-0.948338
321	0.251149	u*_skin/ws	tau_sk	tau_sk	0.862625	-0.485968	0.49852	-0.339134
322	0.235018	u*_skin/ws	Rp_skin	S	0.373966	-0.320959	0.110972	-0.0434151
323	0.235018	u*_skin/ws	S	Rp_skin	0.373966	-0.320959	-0.0434151	0.110972
324	0.233091	u*_skin/ws	Rp_skin	H/D50	0.437481	-0.340843	0.0762631	0.0327508
325	0.233091	u*_skin/ws	H/D50	Rp_skin	0.437481	-0.340843	0.0327508	0.0762631
326	0.230698	u*_skin/ws	H/D50	u*_skin/ws	0.550539	-0.124427	0.0265585	-0.253379
327	0.230698	u*_skin/ws	u*_skin/ws	H/D50	0.550539	-0.124427	-0.253379	0.0265585
328	0.230698	u*_skin/ws	H/D50	H/D50	0.550526	-0.3778	0.44216	-0.415599
329	0.230695	u*_skin/ws	S	S	0.551666	-0.375561	-0.648218	0.620146
330	0.230695	u*_skin/ws	u*_skin/ws	S	0.551677	-0.653376	0.277793	-0.0280722
331	0.230695	u*_skin/ws	S	u*_skin/ws	0.551677	-0.653376	-0.0280722	0.277793
332	0.230212	u*_skin/ws	H/D50	S	0.580026	-0.383005	0.0371534	0.0161582
333	0.230212	u*_skin/ws	S	H/D50	0.580026	-0.383005	0.0161582	0.0371534
334	0.227433	u*_skin/ws	Rp_skin	Rp_skin	0.6555	-0.354967	-0.547996	0.590162
335	0.227433	u*_skin/ws	Rp_skin	u*_skin/ws	0.655481	-1.20286	0.042172	0.847906
336	0.227433	u*_skin/ws	u*_skin/ws	Rp_skin	0.655481	-1.20286	0.847906	0.042172

## Sheet: Entrainment_1parameter
ranking	rsquared	parameter	A	e1
1	0.610078	u*_skin/ws	4.24449e-05	1.932
2	0.451327	tau_sk	0.000686865	1.59914
3	0.425368	Rp	0.0238342	-1.91796
4	0.392387	Rep	0.00141751	-1.19788
5	0.323503	u*/ws	3.69962e-05	1.4299
6	0.303932	Fr	0.00712886	1.53215
7	0.20521	Rp_skin	0.00499714	-1.55173
8	0.122521	Cf	5.10589e-06	-0.767942
9	0.107233	S	0.0285495	0.452112
10	0.0990567	H/D50	0.0258537	-0.410579
11	0.0727691	tau	0.000253514	0.5934
12	0.0672847	Di/D50	0.000286532	-0.873372

## Sheet: Entrainment_2parameter
ranking	rsquared	parameter1	parameter2	A	e1	e2
1	0.790978	u*_skin/ws	Fr	0.000498888	1.75147	1.19941
2	0.743156	u*/ws	Fr	0.000741852	1.68672	1.82267
3	0.7312	u*_skin/ws	H/D50	0.00410182	1.96838	-0.454409
4	0.72882	u*_skin/ws	u*/ws	0.000157232	3.80954	-2.09573
5	0.72882	u*/ws	u*_skin/ws	0.000157232	-2.09573	3.80954
6	0.716018	u*_skin/ws	S	0.00295811	1.92995	0.449382
7	0.678217	u*_skin/ws	Di/D50	3.68391e-05	2.4157	1.09817
8	0.65144	u*_skin/ws	tau_sk	8.90116e-05	1.48307	0.648848
9	0.645542	u*_skin/ws	Rep	0.000104195	1.57235	-0.454968
10	0.632545	u*_skin/ws	Cf	6.88779e-06	1.83095	-0.340843
11	0.629791	u*_skin/ws	Rp	0.000221102	1.58374	-0.584706
12	0.621587	u*_skin/ws	Rp_skin	1.40967e-05	2.1785	0.501563
13	0.610278	u*_skin/ws	tau	4.28662e-05	1.94559	-0.0333653
14	0.523491	u*/ws	Rep	0.000206803	0.98037	-0.921015
15	0.5227	u*/ws	tau_sk	0.000166189	0.777059	1.22913
16	0.51365	u*/ws	H/D50	0.00926054	1.65149	-0.580348
17	0.503643	u*/ws	Rp	0.00223388	0.812614	-1.44199
18	0.481616	u*/ws	Cf	2.23896e-07	1.51152	-0.875316
19	0.474398	u*/ws	S	0.00506943	1.53159	0.539209
20	0.422583	u*/ws	Di/D50	1.29403e-05	2.46041	1.74009
21	0.331091	u*/ws	Rp_skin	0.000101477	1.22405	-0.409523
22	0.323791	u*/ws	tau	3.67046e-05	1.45455	-0.0431191

## Sheet: Entrainment_3parameter
ranking	rsquared	parameter1	parameter2	parameter3	A	e1	e2	e3
1	0.803496	u*_skin/ws	Fr	Rp_skin	0.00264949	1.43176	1.37322	-0.597258
2	0.803496	u*_skin/ws	Rp_skin	Fr	0.00264949	1.43176	-0.597258	1.37322
3	0.801427	u*_skin/ws	Fr	Rp	0.00157954	1.50083	1.17308	-0.427463
4	0.801427	u*_skin/ws	Rp	Fr	0.00157954	1.50083	-0.427463	1.17308
5	0.801198	u*_skin/ws	Di/D50	H/D50	0.00368	2.45896	1.11309	-0.457898
6	0.801198	u*_skin/ws	H/D50	Di/D50	0.00368	2.45896	-0.457898	1.11309
7	0.799396	u*/ws	Fr	Rep	0.00130787	1.39772	1.5758	-0.52076
8	0.799396	u*/ws	Rep	Fr	0.00130787	1.39772	-0.52076	1.5758
9	0.795082	u*_skin/ws	Di/D50	Fr	0.000390956	1.90188	0.307541	1.10004
10	0.795082	u*_skin/ws	Fr	Di/D50	0.000390956	1.90188	1.10004	0.307541
11	0.792138	u*_skin/ws	Fr	S	0.00030673	1.73172	1.33297	-0.0805622
12	0.792138	u*_skin/ws	S	Fr	0.00030673	1.73172	-0.0805622	1.33297
13	0.792138	u*_skin/ws	Cf	S	0.00030676	1.73172	-0.666478	0.585929
14	0.792138	u*_skin/ws	S	Cf	0.00030676	1.73172	0.585929	-0.666478
15	0.792138	u*_skin/ws	Fr	Cf	0.000306742	1.73172	1.17184	-0.080553
16	0.792138	u*_skin/ws	Cf	Fr	0.000306742	1.73172	-0.080553	1.17184
17	0.791616	u*_skin/ws	Fr	tau	0.00050971	1.77547	1.20123	-0.0596301
18	0.791616	u*_skin/ws	tau	Fr	0.00050971	1.77547	-0.0596301	1.20123
19	0.791073	u*_skin/ws	Fr	H/D50	0.000431391	1.74347	1.24032	0.0228089
20	0.791073	u*_skin/ws	H/D50	Fr	0.000431391	1.74347	0.0228089	1.24032
21	0.790978	u*_skin/ws	Fr	u*_skin/ws	0.000498865	0.222363	1.19937	1.52911
22	0.790978	u*_skin/ws	u*_skin/ws	Fr	0.000498865	0.222363	1.52911	1.19937
23	0.790978	u*_skin/ws	Fr	Fr	0.000498848	1.75148	-0.428551	1.62792
24	0.789515	u*_skin/ws	Fr	tau_sk	0.000352079	1.86474	1.12878	-0.200813
25	0.789515	u*_skin/ws	tau_sk	Fr	0.000352079	1.86474	-0.200813	1.12878
26	0.789356	u*/ws	Fr	Rp	0.00446973	1.43751	1.8757	-0.592213
27	0.789356	u*/ws	Rp	Fr	0.00446973	1.43751	-0.592213	1.8757
28	0.789343	u*_skin/ws	Rep	Fr	0.000810102	1.7025	-0.0471312	1.3903
29	0.789343	u*_skin/ws	Fr	Rep	0.000810102	1.7025	1.3903	-0.0471312
30	0.789051	u*_skin/ws	S	u*/ws	0.00336454	3.45365	0.350522	-1.70027
31	0.789051	u*/ws	S	u*_skin/ws	0.00336454	-1.70027	0.350522	3.45365
32	0.789051	u*_skin/ws	u*/ws	S	0.00336454	3.45365	-1.70027	0.350522
33	0.789051	u*/ws	u*_skin/ws	S	0.00336454	-1.70027	3.45365	0.350522
34	0.789003	u*/ws	Cf	S	3.05089e-05	1.70624	-1.311	0.817182
35	0.789003	u*/ws	S	Cf	3.05089e-05	1.70624	0.817182	-1.311
36	0.789003	u*/ws	Fr	Cf	3.05068e-05	1.70623	1.63436	-0.493829
37	0.789003	u*/ws	Cf	Fr	3.05068e-05	1.70623	-0.493829	1.63436
38	0.789003	u*/ws	Fr	S	3.05082e-05	1.70623	2.62202	-0.493825
39	0.789003	u*/ws	S	Fr	3.05082e-05	1.70623	-0.493825	2.62202
40	0.788903	u*_skin/ws	H/D50	Rep	0.0205257	1.50851	-0.49944	-0.586302
41	0.788903	u*_skin/ws	Rep	H/D50	0.0205257	1.50851	-0.586302	-0.49944
42	0.788792	u*_skin/ws	Fr	u*/ws	0.000548359	1.54202	1.30969	0.215783
43	0.788792	u*/ws	Fr	u*_skin/ws	0.000548359	0.215783	1.30969	1.54202
44	0.788792	u*_skin/ws	u*/ws	Fr	0.000548359	1.54202	0.215783	1.30969
45	0.788792	u*/ws	u*_skin/ws	Fr	0.000548359	0.215783	1.54202	1.30969
46	0.788449	u*_skin/ws	Rep	S	0.0250071	1.40182	-0.667604	0.535877
47	0.788449	u*_skin/ws	S	Rep	0.0250071	1.40182	0.535877	-0.667604
48	0.786888	u*/ws	Cf	H/D50	4.95941e-05	1.83058	-1.1881	-0.759271
49	0.786888	u*/ws	H/D50	Cf	4.95941e-05	1.83058	-0.759271	-1.1881
50	0.785844	u*_skin/ws	H/D50	Cf	0.000485626	1.82333	-0.524792	-0.531273
51	0.785844	u*_skin/ws	Cf	H/D50	0.000485626	1.82333	-0.531273	-0.524792
52	0.785677	u*_skin/ws	Di/D50	S	0.0026426	2.41904	1.11039	0.452608
53	0.785677	u*_skin/ws	S	Di/D50	0.0026426	2.41904	0.452608	1.11039
54	0.78491	u*/ws	Fr	Rp_skin	0.00972728	1.21073	1.92549	-0.975806
55	0.78491	u*/ws	Rp_skin	Fr	0.00972728	1.21073	-0.975806	1.92549
56	0.774778	u*_skin/ws	Cf	u*/ws	0.0378045	5.635	0.82078	-3.86167
57	0.774778	u*/ws	Cf	u*_skin/ws	0.0378045	-3.86167	0.82078	5.635
58	0.774778	u*_skin/ws	u*/ws	Cf	0.0378045	5.635	-3.86167	0.82078
59	0.774778	u*/ws	u*_skin/ws	Cf	0.0378045	-3.86167	5.635	0.82078
60	0.764252	u*/ws	Fr	H/D50	8.28657e-05	1.64045	2.37889	0.326484
61	0.764252	u*/ws	H/D50	Fr	8.28657e-05	1.64045	0.326484	2.37889
62	0.76365	u*/ws	Fr	tau	0.000788642	1.90949	1.90094	-0.370471
63	0.76365	u*/ws	tau	Fr	0.000788642	1.90949	-0.370471	1.90094
64	0.757099	u*_skin/ws	Rp	S	0.0143795	1.46129	-0.721185	0.39858
65	0.757099	u*_skin/ws	S	Rp	0.0143795	1.46129	0.39858	-0.721185
66	0.752536	u*_skin/ws	u*/ws	tau	0.000186035	4.05789	-2.55713	0.405191
67	0.752536	u*/ws	u*_skin/ws	tau	0.000186035	-2.55713	4.05789	0.405191
68	0.752536	u*_skin/ws	tau	u*/ws	0.000186035	4.05789	0.405191	-2.55713
69	0.752536	u*/ws	tau	u*_skin/ws	0.000186035	-2.55713	0.405191	4.05789
70	0.747783	u*/ws	Di/D50	Fr	0.000542361	1.73105	0.13873	1.67604
71	0.747783	u*/ws	Fr	Di/D50	0.000542361	1.73105	1.67604	0.13873
72	0.746994	u*_skin/ws	H/D50	tau	0.0076089	2.09936	-0.506664	-0.311286
73	0.746994	u*_skin/ws	tau	H/D50	0.0076089	2.09936	-0.311286	-0.506664
74	0.744889	u*_skin/ws	S	tau	0.00964077	2.11022	0.560559	-0.443781
75	0.744889	u*_skin/ws	tau	S	0.00964077	2.11022	-0.443781	0.560559
76	0.743466	u*/ws	Fr	tau_sk	0.000673408	1.76261	1.86737	-0.14088
77	0.743466	u*/ws	tau_sk	Fr	0.000673408	1.76261	-0.14088	1.86737
78	0.743156	u*/ws	Fr	Fr	0.000741889	1.68672	2.15524	-0.332549
79	0.743047	u*/ws	Fr	u*/ws	0.000699115	-0.308712	1.79431	1.99762
80	0.743047	u*/ws	u*/ws	Fr	0.000699115	-0.308712	1.99762	1.79431
81	0.741573	u*/ws	H/D50	Rep	0.0658946	1.10216	-0.579488	-1.01035
82	0.741573	u*/ws	Rep	H/D50	0.0658946	1.10216	-1.01035	-0.579488
83	0.737518	u*_skin/ws	u*/ws	tau_sk	0.000198755	3.41018	-1.89388	0.31584
84	0.737518	u*/ws	u*_skin/ws	tau_sk	0.000198755	-1.89388	3.41018	0.31584
85	0.737518	u*_skin/ws	tau_sk	u*/ws	0.000198755	3.41018	0.31584	-1.89388
86	0.737518	u*/ws	tau_sk	u*_skin/ws	0.000198755	-1.89388	0.31584	3.41018
87	0.73627	u*/ws	Rep	S	0.100059	1.03167	-1.06613	0.647742
88	0.73627	u*/ws	S	Rep	0.100059	1.03167	0.647742	-1.06613
89	0.733401	u*_skin/ws	H/D50	tau_sk	0.00359919	1.84882	-0.422228	0.169093
90	0.733401	u*_skin/ws	tau_sk	H/D50	0.00359919	1.84882	0.169093	-0.422228
91	0.731253	u*_skin/ws	H/D50	S	0.00353105	1.96726	-0.552261	-0.120974
92	0.731253	u*_skin/ws	S	H/D50	0.00353105	1.96726	-0.120974	-0.552261
93	0.73124	u*_skin/ws	H/D50	Rp_skin	0.00373369	1.98351	-0.451874	0.0311865
94	0.73124	u*_skin/ws	Rp_skin	H/D50	0.00373369	1.98351	0.0311865	-0.451874
95	0.7312	u*_skin/ws	H/D50	u*_skin/ws	0.00410198	1.59924	-0.454413	0.369165
96	0.7312	u*_skin/ws	u*_skin/ws	H/D50	0.00410198	1.59924	0.369165	-0.454413
97	0.729974	u*_skin/ws	Rp	u*/ws	0.000106887	4.01136	0.162667	-2.21286
98	0.729974	u*/ws	Rp	u*_skin/ws	0.000106887	-2.21286	0.162667	4.01136
99	0.729974	u*_skin/ws	u*/ws	Rp	0.000106887	4.01136	-2.21286	0.162667
100	0.729974	u*/ws	u*_skin/ws	Rp	0.000106887	-2.21286	4.01136	0.162667
101	0.728886	u*_skin/ws	Rep	u*/ws	0.000153199	3.85897	0.0239388	-2.12976
102	0.728886	u*_skin/ws	u*/ws	Rep	0.000153199	3.85897	-2.12976	0.0239388
103	0.728886	u*/ws	u*_skin/ws	Rep	0.000153199	-2.12976	3.85897	0.0239388
104	0.728886	u*/ws	Rep	u*_skin/ws	0.000153199	-2.12976	0.0239388	3.85897
105	0.728849	u*_skin/ws	Di/D50	u*/ws	0.000152979	3.79154	0.0340748	-2.05887
106	0.728849	u*/ws	Di/D50	u*_skin/ws	0.000152979	-2.05887	0.0340748	3.79154
107	0.728849	u*_skin/ws	u*/ws	Di/D50	0.000152979	3.79154	-2.05887	0.0340748
108	0.728849	u*/ws	u*_skin/ws	Di/D50	0.000152979	-2.05887	3.79154	0.0340748
109	0.72882	u*_skin/ws	u*/ws	u*/ws	0.000157229	3.80952	0.333577	-2.42927
110	0.72882	u*/ws	u*_skin/ws	u*/ws	0.000157229	0.333577	3.80952	-2.42927
111	0.72882	u*/ws	u*/ws	u*_skin/ws	0.000157229	0.333577	-2.42927	3.80952
112	0.72882	u*_skin/ws	u*_skin/ws	u*/ws	0.000157233	2.11569	1.6938	-2.09568
113	0.72882	u*_skin/ws	u*/ws	u*_skin/ws	0.000157233	2.11569	-2.09568	1.6938
114	0.72882	u*/ws	u*_skin/ws	u*_skin/ws	0.000157233	-2.09568	2.11569	1.6938
115	0.718621	u*_skin/ws	Rp_skin	S	0.00761525	1.79714	-0.269915	0.486697
116	0.718621	u*_skin/ws	S	Rp_skin	0.00761525	1.79714	0.486697	-0.269915
117	0.71794	u*_skin/ws	H/D50	H/D50	0.016878	2.04436	1.79484	-2.3938
118	0.717593	u*_skin/ws	S	tau_sk	0.00255518	1.82751	0.415958	0.148288
119	0.717593	u*_skin/ws	tau_sk	S	0.00255518	1.82751	0.148288	0.415958
120	0.716018	u*_skin/ws	S	S	0.00295806	1.92996	0.951943	-0.502561
121	0.716018	u*_skin/ws	S	u*_skin/ws	0.00295798	1.16806	0.449376	0.761882
122	0.716018	u*_skin/ws	u*_skin/ws	S	0.00295798	1.16806	0.761882	0.449376
123	0.710796	u*_skin/ws	tau_sk	Di/D50	7.19097e-05	1.98524	0.578242	1.02916
124	0.710796	u*_skin/ws	Di/D50	tau_sk	7.19097e-05	1.98524	1.02916	0.578242
125	0.706671	u*_skin/ws	Rep	tau_sk	0.000334654	0.915798	-0.58011	0.805945
126	0.706671	u*_skin/ws	tau_sk	Rep	0.000334654	0.915798	0.805945	-0.58011
127	0.699298	u*/ws	Rp	S	3.28798	0.885043	-1.61658	0.744273
128	0.699298	u*/ws	S	Rp	3.28798	0.885043	0.744273	-1.61658
129	0.697614	u*/ws	Di/D50	H/D50	0.00786979	3.14839	2.43895	-0.71796
130	0.697614	u*/ws	H/D50	Di/D50	0.00786979	3.14839	-0.71796	2.43895
131	0.695823	u*_skin/ws	Rp	tau_sk	0.00151495	0.790235	-0.919218	0.858971
132	0.695823	u*_skin/ws	tau_sk	Rp	0.00151495	0.790235	0.858971	-0.919218
133	0.69326	u*_skin/ws	Di/D50	tau	3.2268e-05	2.40293	1.37224	0.32777
134	0.69326	u*_skin/ws	tau	Di/D50	3.2268e-05	2.40293	0.32777	1.37224
135	0.69113	u*_skin/ws	Rp_skin	Rep	1.49147e-05	1.91742	1.11504	-0.711618
136	0.69113	u*_skin/ws	Rep	Rp_skin	1.49147e-05	1.91742	-0.711618	1.11504
137	0.687212	u*_skin/ws	Di/D50	Rp_skin	1.39201e-05	2.62543	1.07895	0.443954
138	0.687212	u*_skin/ws	Rp_skin	Di/D50	1.39201e-05	2.62543	0.443954	1.07895
139	0.686838	u*_skin/ws	Di/D50	Cf	0.000218042	2.74101	1.60413	0.345512
140	0.686838	u*_skin/ws	Cf	Di/D50	0.000218042	2.74101	0.345512	1.60413
141	0.684157	u*_skin/ws	Di/D50	Rep	1.63335e-05	2.96183	1.66498	0.375014
142	0.684157	u*_skin/ws	Rep	Di/D50	1.63335e-05	2.96183	0.375014	1.66498
143	0.678807	u*/ws	Rep	tau_sk	0.000651877	0.448741	-0.819989	1.09375
144	0.678807	u*/ws	tau_sk	Rep	0.000651877	0.448741	1.09375	-0.819989
145	0.678634	u*_skin/ws	Di/D50	Rp	4.8619e-05	2.33832	1.05258	-0.0962158
146	0.678634	u*_skin/ws	Rp	Di/D50	4.8619e-05	2.33832	-0.0962158	1.05258
147	0.678217	u*_skin/ws	Di/D50	Di/D50	3.68394e-05	2.4157	2.31325	-1.2151
148	0.678217	u*_skin/ws	Di/D50	u*_skin/ws	3.68406e-05	1.81691	1.09816	0.598769
149	0.678217	u*_skin/ws	u*_skin/ws	Di/D50	3.68406e-05	1.81691	0.598769	1.09816
150	0.67366	u*/ws	Rp	tau_sk	0.00644277	0.25755	-1.32465	1.13955
151	0.67366	u*/ws	tau_sk	Rp	0.00644277	0.25755	1.13955	-1.32465
152	0.669886	u*_skin/ws	tau_sk	Cf	1.64729e-05	1.41254	0.618083	-0.309629
153	0.669886	u*_skin/ws	Cf	tau_sk	1.64729e-05	1.41254	-0.309629	0.618083
154	0.66945	u*_skin/ws	H/D50	u*/ws	0.0226906	1.47211	-0.656439	0.575252
155	0.66945	u*/ws	H/D50	u*_skin/ws	0.0226906	0.575252	-0.656439	1.47211
156	0.66945	u*_skin/ws	u*/ws	H/D50	0.0226906	1.47211	0.575252	-0.656439
157	0.66945	u*/ws	u*_skin/ws	H/D50	0.0226906	0.575252	1.47211	-0.656439
158	0.664956	u*_skin/ws	tau_sk	tau	0.000120142	1.4809	0.832161	-0.306067
159	0.664956	u*_skin/ws	tau	tau_sk	0.000120142	1.4809	-0.306067	0.832161
160	0.658967	u*_skin/ws	H/D50	Rp	0.0185121	2.24479	-0.70755	0.379556
161	0.658967	u*_skin/ws	Rp	H/D50	0.0185121	2.24479	0.379556	-0.70755
162	0.655705	u*_skin/ws	Rep	tau	0.000129419	1.33802	-0.606895	0.280422
163	0.655705	u*_skin/ws	tau	Rep	0.000129419	1.33802	0.280422	-0.606895
164	0.65171	u*_skin/ws	Rp_skin	tau_sk	0.000114734	1.40943	-0.0954487	0.687459
165	0.65171	u*_skin/ws	tau_sk	Rp_skin	0.000114734	1.40943	0.687459	-0.0954487
166	0.65144	u*_skin/ws	tau_sk	tau_sk	8.90133e-05	1.48307	4.36761	-3.71875
167	0.65144	u*_skin/ws	u*_skin/ws	tau_sk	8.90154e-05	-0.506593	1.98963	0.648887
168	0.65144	u*_skin/ws	tau_sk	u*_skin/ws	8.90154e-05	-0.506593	0.648887	1.98963
169	0.646225	u*/ws	Rp_skin	Rp	9.29201e-05	1.69358	1.97298	-2.15517
170	0.646225	u*/ws	Rp	Rp_skin	9.29201e-05	1.69358	-2.15517	1.97298
171	0.645681	u*_skin/ws	Rp	Rep	8.94862e-05	1.59099	0.0790838	-0.490956
172	0.645681	u*_skin/ws	Rep	Rp	8.94862e-05	1.59099	-0.490956	0.0790838
173	0.645542	u*_skin/ws	Rep	Rep	0.000104197	1.57234	-4.07906	3.62409
174	0.645542	u*_skin/ws	u*_skin/ws	Rep	0.000104196	2.1402	-0.567858	-0.454976
175	0.645542	u*_skin/ws	Rep	u*_skin/ws	0.000104196	2.1402	-0.454976	-0.567858
176	0.645531	u*_skin/ws	Cf	tau	1.81811e-06	1.61645	-0.570536	0.359395
177	0.645531	u*_skin/ws	tau	Cf	1.81811e-06	1.61645	0.359395	-0.570536
178	0.643818	u*_skin/ws	Rp_skin	Cf	2.33567e-06	2.07545	0.496455	-0.339045
179	0.643818	u*_skin/ws	Cf	Rp_skin	2.33567e-06	2.07545	-0.339045	0.496455
180	0.63746	u*_skin/ws	Rp	Cf	3.19505e-05	1.6543	-0.348062	-0.237386
181	0.63746	u*_skin/ws	Cf	Rp	3.19505e-05	1.6543	-0.237386	-0.348062
182	0.634045	u*_skin/ws	Rp	tau	0.000327445	1.41727	-0.742529	0.178016
183	0.634045	u*_skin/ws	tau	Rp	0.000327445	1.41727	0.178016	-0.742529
184	0.632545	u*_skin/ws	Cf	u*_skin/ws	6.88786e-06	6.58107	-0.340845	-4.75014
185	0.632545	u*_skin/ws	u*_skin/ws	Cf	6.88786e-06	6.58107	-4.75014	-0.340845
186	0.632545	u*_skin/ws	Cf	Cf	6.88801e-06	1.83094	2.04857	-2.38941
187	0.629791	u*_skin/ws	Rp	Rp	0.000221108	1.58376	-4.90565	4.32093
188	0.629791	u*_skin/ws	Rp	u*_skin/ws	0.000221101	0.015584	-0.584703	1.56817
189	0.629791	u*_skin/ws	u*_skin/ws	Rp	0.000221101	0.015584	1.56817	-0.584703
190	0.623124	u*_skin/ws	Rp_skin	tau	1.32152e-05	2.23788	0.543737	-0.0949019
191	0.623124	u*_skin/ws	tau	Rp_skin	1.32152e-05	2.23788	-0.0949019	0.543737
192	0.621587	u*_skin/ws	Rp_skin	Rp_skin	1.40953e-05	2.17852	-0.180357	0.681965
193	0.621587	u*_skin/ws	Rp_skin	u*_skin/ws	1.4096e-05	0.888702	0.501585	1.28981
194	0.621587	u*_skin/ws	u*_skin/ws	Rp_skin	1.4096e-05	0.888702	1.28981	0.501585
195	0.61456	u*/ws	Di/D50	S	0.00170045	2.77551	2.1342	0.557434
196	0.61456	u*/ws	S	Di/D50	0.00170045	2.77551	0.557434	2.1342
197	0.613797	u*_skin/ws	Rp_skin	u*/ws	5.31474e-06	2.5004	0.904952	-0.0174637
198	0.613797	u*/ws	Rp_skin	u*_skin/ws	5.31474e-06	-0.0174637	0.904952	2.5004
199	0.613797	u*_skin/ws	u*/ws	Rp_skin	5.31474e-06	2.5004	-0.0174637	0.904952
200	0.613797	u*/ws	u*_skin/ws	Rp_skin	5.31474e-06	-0.0174637	2.5004	0.904952
201	0.610278	u*_skin/ws	tau	tau	4.28667e-05	1.94563	1.40778	-1.44117
202	0.610278	u*_skin/ws	u*_skin/ws	tau	4.28666e-05	-2.94117	4.88676	-0.0333652
203	0.610278	u*_skin/ws	tau	u*_skin/ws	4.28666e-05	-2.94117	-0.0333652	4.88676
204	0.599233	u*_skin/ws	Rep	Cf	0.00447101	1.5635	-0.830871	0.583836
205	0.599233	u*_skin/ws	Cf	Rep	0.00447101	1.5635	0.583836	-0.830871
206	0.597073	u*/ws	Cf	tau_sk	3.09444e-06	0.965999	-0.631414	0.984263
207	0.597073	u*/ws	tau_sk	Cf	3.09444e-06	0.965999	0.984263	-0.631414
208	0.591264	u*/ws	Di/D50	tau_sk	6.45509e-05	1.57714	1.20168	1.05526
209	0.591264	u*/ws	tau_sk	Di/D50	6.45509e-05	1.57714	1.05526	1.20168
210	0.587696	u*/ws	tau_sk	Rp_skin	0.00525639	0.000534287	1.48441	-1.27521
211	0.587696	u*/ws	Rp_skin	tau_sk	0.00525639	0.000534287	-1.27521	1.48441
212	0.580578	u*/ws	tau_sk	H/D50	0.00288612	0.94845	1.00082	-0.317239
213	0.580578	u*/ws	H/D50	tau_sk	0.00288612	0.94845	-0.317239	1.00082
214	0.567647	u*/ws	tau_sk	tau	0.000203461	0.978094	1.48231	-0.58701
215	0.567647	u*/ws	tau	tau_sk	0.000203461	0.978094	-0.58701	1.48231
216	0.565796	u*/ws	Rp_skin	Rep	4.99524e-05	1.07522	1.02875	-1.32214
217	0.565796	u*/ws	Rep	Rp_skin	4.99524e-05	1.07522	-1.32214	1.02875
218	0.565396	u*/ws	H/D50	tau	0.0327042	2.07294	-0.725215	-0.640624
219	0.565396	u*/ws	tau	H/D50	0.0327042	2.07294	-0.640624	-0.725215
220	0.563882	u*/ws	Rep	tau	0.000335568	0.555864	-1.12452	0.568928
221	0.563882	u*/ws	tau	Rep	0.000335568	0.555864	0.568928	-1.12452
222	0.560215	u*_skin/ws	Rp_skin	Rp	4.33818e-05	1.78746	-0.383591	0.355946
223	0.560215	u*_skin/ws	Rp	Rp_skin	4.33818e-05	1.78746	0.355946	-0.383591
224	0.547399	u*/ws	S	tau_sk	0.000598664	0.958412	0.182824	0.869187
225	0.547399	u*/ws	tau_sk	S	0.000598664	0.958412	0.869187	0.182824
226	0.538535	u*/ws	S	tau	0.0147885	1.95035	0.670811	-0.698597
227	0.538535	u*/ws	tau	S	0.0147885	1.95035	-0.698597	0.670811
228	0.5379	u*/ws	Rp	tau	0.00580125	0.385089	-1.74409	0.521686
229	0.5379	u*/ws	tau	Rp	0.00580125	0.385089	0.521686	-1.74409
230	0.537192	u*/ws	H/D50	Rp_skin	0.0747484	1.29657	-0.61095	-0.729349
231	0.537192	u*/ws	Rp_skin	H/D50	0.0747484	1.29657	-0.729349	-0.61095
232	0.536915	u*/ws	Rp_skin	S	0.410594	0.921183	-1.26677	0.678723
233	0.536915	u*/ws	S	Rp_skin	0.410594	0.921183	0.678723	-1.26677
234	0.534883	u*/ws	Cf	tau	3.91609e-08	1.14518	-1.1958	0.69323
235	0.534883	u*/ws	tau	Cf	3.91609e-08	1.14518	0.69323	-1.1958
236	0.529365	u*/ws	Rep	Cf	2.93802e-05	1.10243	-0.722659	-0.270929
237	0.529365	u*/ws	Cf	Rep	2.93802e-05	1.10243	-0.270929	-0.722659
238	0.529014	u*/ws	Rp	Rep	0.000844133	0.858103	-0.766804	-0.511496
239	0.529014	u*/ws	Rep	Rp	0.000844133	0.858103	-0.511496	-0.766804
240	0.524263	u*/ws	Rp	Cf	4.5606e-05	1.05419	-0.973095	-0.438408
241	0.524263	u*/ws	Cf	Rp	4.5606e-05	1.05419	-0.438408	-0.973095
242	0.523491	u*/ws	Rep	u*/ws	0.000206802	1.09333	-0.921008	-0.112976
243	0.523491	u*/ws	u*/ws	Rep	0.000206802	1.09333	-0.112976	-0.921008
244	0.523491	u*/ws	Rep	Rep	0.000206794	0.980363	-1.8067	0.885698
245	0.5227	u*/ws	u*/ws	tau_sk	0.000166192	1.01307	-0.236018	1.22916
246	0.5227	u*/ws	tau_sk	u*/ws	0.000166192	1.01307	1.22916	-0.236018
247	0.5227	u*/ws	tau_sk	tau_sk	0.000166194	0.77704	2.61742	-1.38825
248	0.521345	u*/ws	H/D50	S	0.00777904	1.7153	-0.944424	-0.398796
249	0.521345	u*/ws	S	H/D50	0.00777904	1.7153	-0.398796	-0.944424
250	0.51365	u*/ws	H/D50	u*/ws	0.00926131	0.912444	-0.580355	0.739039
251	0.51365	u*/ws	u*/ws	H/D50	0.00926131	0.912444	0.739039	-0.580355
252	0.51365	u*/ws	H/D50	H/D50	0.00926094	1.65148	0.123446	-0.703798
253	0.513527	u*/ws	Di/D50	Rp	0.000237713	1.89569	1.43074	-0.975236
254	0.513527	u*/ws	Rp	Di/D50	0.000237713	1.89569	-0.975236	1.43074
255	0.503643	u*/ws	Rp	u*/ws	0.00223372	0.204565	-1.44196	0.608053
256	0.503643	u*/ws	u*/ws	Rp	0.00223372	0.204565	0.608053	-1.44196
257	0.503643	u*/ws	Rp	Rp	0.00223402	0.812578	0.680942	-2.12293
258	0.487718	u*/ws	Di/D50	Cf	3.68409e-07	1.83124	0.562473	-0.731772
259	0.487718	u*/ws	Cf	Di/D50	3.68409e-07	1.83124	-0.731772	0.562473
260	0.483267	u*/ws	Rp_skin	Cf	1.14597e-07	1.61548	0.201313	-0.905093
261	0.483267	u*/ws	Cf	Rp_skin	1.14597e-07	1.61548	-0.905093	0.201313
262	0.481616	u*/ws	Cf	u*/ws	2.23909e-07	4.18427	-0.875311	-2.67275
263	0.481616	u*/ws	u*/ws	Cf	2.23909e-07	4.18427	-2.67275	-0.875311
264	0.481616	u*/ws	Cf	Cf	2.23929e-07	1.51151	2.78778	-3.66308
265	0.474398	u*/ws	S	S	0.00507011	1.53157	1.95025	-1.41103
266	0.474398	u*/ws	S	u*/ws	0.00507007	2.0598	0.539224	-0.528197
267	0.474398	u*/ws	u*/ws	S	0.00507007	2.0598	-0.528197	0.539224
268	0.434054	u*/ws	H/D50	Rp	1.03399	1.7145	-1.01275	-0.148999
269	0.434054	u*/ws	Rp	H/D50	1.03399	1.7145	-0.148999	-1.01275
270	0.430556	u*/ws	Di/D50	tau	1.24843e-05	2.40387	1.86835	0.231292
271	0.430556	u*/ws	tau	Di/D50	1.24843e-05	2.40387	0.231292	1.86835
272	0.422583	u*/ws	Di/D50	u*/ws	1.29404e-05	-1.68897	1.74005	4.14935
273	0.422583	u*/ws	u*/ws	Di/D50	1.29404e-05	-1.68897	4.14935	1.74005
274	0.422536	u*/ws	Di/D50	Di/D50	1.32519e-05	2.43675	2.04671	-0.344173
275	0.421749	u*/ws	Di/D50	Rp_skin	2.0957e-05	2.2742	1.56376	-0.149618
276	0.421749	u*/ws	Rp_skin	Di/D50	2.0957e-05	2.2742	-0.149618	1.56376
277	0.333293	u*/ws	Di/D50	Rep	3.48027e-06	3.50719	3.4073	0.250445
278	0.333293	u*/ws	Rep	Di/D50	3.48027e-06	3.50719	0.250445	3.4073
279	0.33145	u*/ws	Rp_skin	tau	0.000112579	1.17489	-0.447789	0.0523963
280	0.33145	u*/ws	tau	Rp_skin	0.000112579	1.17489	0.0523963	-0.447789
281	0.331091	u*/ws	Rp_skin	u*/ws	0.000101469	-3.91094	-0.409491	5.13502
282	0.331091	u*/ws	u*/ws	Rp_skin	0.000101469	-3.91094	5.13502	-0.409491
283	0.331091	u*/ws	Rp_skin	Rp_skin	0.000101468	1.22408	-4.87055	4.46107
284	0.323791	u*/ws	u*/ws	tau	3.67051e-05	1.24903	0.205493	-0.0430817
285	0.323791	u*/ws	tau	u*/ws	3.67051e-05	1.24903	-0.0430817	0.205493
286	0.323791	u*/ws	tau	tau	3.67068e-05	1.45452	-1.23357	1.19047
